# Supplementary material for: Transcriptomic Analyses of the Adenoma-Carcinoma Sequence Identify Hallmarks Associated With the Onset of Colorectal Cancer
Source: Front Oncol. 2021 Aug 11;11:704531. doi: 10.3389/fonc.2021.704531 (PMC8387103; doi:10.3389/fonc.2021.704531)
Supplement: Supplementary file 2 [file Table_1.xlsx]

## Sheet: Clinic information
Patient ID	Gender	Age of Diagnosis of Primary Tumor	Size of pimary tumor at diagnosis(cm)	Primary Site	Metastasis site	Stage of diagnosis of primary tumor(TNM stage)	Pathology of primary tumor	Pathology of metastasis tumor	Diameter of adenomas(cm)	Pathology of adenomas	Resection	Chemotheray after resection	Radiotherapy	Date of Death	Data of Metastasis	CMS of primary tumor	CMS of of adenomas
P1	male	69	4*3	ileocecum	liver	T3N0M1	Adenocarcinoma, grade 2 differentiation	adenocarcinoma	0.8	Tubular adenoma with low grade intraepithelial neoplasia	Hepatotomy and enterotomy	Yes	No	alive	synchronous	NA	CMS3
P2	female	62	3.5*3	rectum	NA	T3N0M0	Adenocarcinoma, grade 2 differentiation		0.6	Tubular adenoma with low grade intraepithelial neoplasia	Enterotomy	NA	No	NA	NA	CMS2	CMS3
P3	male	55	4*3	rectum	liver	T3N0M1	Adenocarcinoma, grade 3 differentiation, partly mucinous adenocarcinoma	adenocarcinoma	0.8	Tubular adenoma with low grade intraepithelial neoplasia	Hepatotomy and enterotomy	Yes	No	NA	synchronous	CMS3	CMS3
P4	male	54	6*4	rectum	pulmonary	T3N2aM	Adenocarcinoma, grade 2-3 differentiation		0.8	Tubular adenoma with low grade intraepithelial neoplasia	Enterotomy	Yes	No	alive	2016.9	CMS4	CMS3
P5	male	67	5*4	rectum	liver	T3N0M1	Adenocarcinoma, grade 2 differentiation	adenocarcinoma	0.4	Tubulovillous adenoma with low grade intraepithelial neoplasia	Hepatotomy and enterotomy	Yes	No	alive	synchronous	CMS2	CMS3

## Sheet: Sheet1
Patient ID	P1	P2	P3	P4	P5
Gender	male	female	male	male	male
Age of Diagnosis of Primary Tumor	69	62	55	54	67
Size of pimary tumor at diagnosis(cm)	4*3	3.5*3	4*3	6*4	5*4
Primary Site	ileocecum	rectum	rectum	rectum	rectum
Metastasis site	liver	NA	liver	pulmonary	liver
Stage of diagnosis of primary tumor(TNM stage)	T3N0M1	T3N0M0	T3N0M1	T3N2aM	T3N0M1
Pathology of primary tumor	Adenocarcinoma, grade 2 differentiation	Adenocarcinoma, grade 2 differentiation	Adenocarcinoma, grade 3 differentiation, partly mucinous adenocarcinoma	Adenocarcinoma, grade 2-3 differentiation	Adenocarcinoma, grade 2 differentiation
Pathology of metastasis tumor	adenocarcinoma		adenocarcinoma		adenocarcinoma
Pathology of adenomas	Tubular adenoma with low grade intraepithelial neoplasia	Tubular adenoma with low grade intraepithelial neoplasia	Tubular adenoma with low grade intraepithelial neoplasia	Tubular adenoma with low grade intraepithelial neoplasia	Tubulovillous adenoma with low grade intraepithelial neoplasia
Resection	Hepatotomy and enterotomy	Enterotomy	Hepatotomy and enterotomy	Enterotomy	Hepatotomy and enterotomy
Chemotheray after resection	Yes	NA	Yes	Yes	Yes
Radiotherapy	No	No	No	No	No
Date of Death	alive	NA	NA	alive	alive
Data of Metastasis	synchronous	NA	synchronous	2016.9	synchronous
CMS of primary tumor	NA	CMS2	CMS3	CMS4	CMS2
CMS of of adenomas	CMS3	CMS3	CMS3	CMS3	CMS3
