# Supplementary material for: Transcriptomic Analyses of the Adenoma-Carcinoma Sequence Identify Hallmarks Associated With the Onset of Colorectal Cancer
Source: Front Oncol. 2021 Aug 11;11:704531. doi: 10.3389/fonc.2021.704531 (PMC8387103; doi:10.3389/fonc.2021.704531)
Supplement: Supplementary file 4 [file Table_3.xlsx]

## Sheet: TA
	ENSEMBL	gene_name	gene_biotype	baseMean	log2FoldChange	lfcSE	stat	pvalue	padj	PA1	PA2	PA3	PA4	PA5	PT1	PT2	PT3	PT4	PT5
19158	ENSG00000107954	NEURL1	protein_coding	345.306	-4.31476	0.37459	-11.5186	1.06285e-30	2.12666e-26	477.338	182.73	394.14	600.453	560.34	8.82765	12.4085	31.298	33.1696	32.1862
5331	ENSG00000146205	ANO7	protein_coding	446.682	-4.94731	0.445874	-11.0958	1.31549e-28	1.31608e-24	815.314	586.228	724.346	1089.55	662.752	7.35638	12.4085	64.9433	37.7223	29.7104
3929	ENSG00000168874	ATOH8	protein_coding	277.037	-4.91592	0.526526	-9.33653	9.95464e-21	6.63941e-17	1389.46	204.359	217.093	272.388	1318.19	28.6899	3.72254	21.1261	20.1619	24.7586
2476	ENSG00000143333	RGS16	protein_coding	104.302	5.20177	0.571102	9.1083	8.36857e-20	4.18617e-16	5.84155	8.95004	6.3231	7.7091	4.38909	159.633	393.969	143.188	604.207	94.0829
30491	ENSG00000275395	FCGBP	protein_coding	25490.8	-4.82826	0.541638	-8.91418	4.9144e-19	1.96665e-15	57138.7	14468.5	13012.9	25674.7	67638.8	641.476	160.069	2162.69	1062.73	5352.82
26852	ENSG00000141756	FKBP10	protein_coding	556.981	2.75717	0.312433	8.82483	1.0963e-18	3.65599e-15	171.909	168.559	103.98	208.146	272.123	762.121	1207.34	1245.66	1326.13	1713.3
11402	ENSG00000186340	THBS2	protein_coding	445.342	5.11919	0.592857	8.63477	5.88433e-18	1.68199e-14	19.1937	35.8002	14.0513	21.4142	13.1673	1811.88	2400.42	94.6764	2044.81	91.607
10989	ENSG00000123500	COL10A1	protein_coding	145.717	8.61345	1.01441	8.49106	2.04755e-17	5.01684e-14	0	1.49167	0	0.856567	1.46303	406.072	1092.57	15.649	656.238	9.90346
18154	ENSG00000182667	NTM	protein_coding	59.5787	6.67602	0.787289	8.47976	2.25656e-17	5.01684e-14	1.66902	1.49167	0.702567	2.5697	0	190.53	258.096	31.298	286.819	14.8552
8100	ENSG00000145423	SFRP2	protein_coding	158.2	6.75257	0.802764	8.41165	4.04279e-17	8.08922e-14	4.17254	3.72918	0	2.5697	0	457.567	393.349	2.34735	731.032	12.3793
11854	ENSG00000122641	INHBA	protein_coding	230.445	5.56068	0.663948	8.37518	5.51412e-17	1.00302e-13	6.67606	30.5793	4.91797	8.56567	5.85212	400.923	1912.77	182.311	796.721	79.2277
15451	ENSG00000137077	CCL21	protein_coding	276.81	4.33329	0.529263	8.18741	2.6691e-16	4.4505e-13	2.50352	8.20421	7.02567	21.4142	20.4824	233.933	307.11	59.4662	407.791	113.89
30661	ENSG00000273777	CEACAM20	protein_coding	31.2742	-25.2275	3.16041	-7.98234	1.4358e-15	2.20992e-12	0	0.745837	0.702567	0.856567	5.85212	0	0	0	0	0
14893	ENSG00000164932	CTHRC1	protein_coding	190.09	5.24596	0.66145	7.931	2.17387e-15	2.98554e-12	6.67606	51.4627	9.13337	17.1313	0	735.638	681.846	113.455	1168.74	29.7104
19584	ENSG00000059804	SLC2A3	protein_coding	210.116	3.40739	0.429825	7.92738	2.23815e-15	2.98554e-12	22.5317	57.4294	24.5898	60.8162	42.4278	193.473	804.69	440.519	797.371	198.069
8589	ENSG00000164283	ESM1	protein_coding	46.09	5.18856	0.683496	7.5912	3.16946e-14	3.9636e-11	6.67606	6.71253	1.40513	0.856567	5.85212	111.817	165.033	167.444	151.539	71.8001
5910	ENSG00000007402	CACNA2D2	protein_coding	88.48	-2.74506	0.362142	-7.58006	3.45383e-14	4.06516e-11	110.155	128.284	176.344	232.986	165.322	22.0691	13.0289	22.691	43.5757	19.8069
4563	ENSG00000236841	AC007750.1	antisense	36.7071	5.64604	0.747938	7.5488	4.39271e-14	4.87639e-11	5.84155	0	0.702567	2.5697	0	134.622	107.954	20.3437	251.699	0
19493	ENSG00000130035	GALNT8	protein_coding	199.505	-3.89157	0.51599	-7.54193	4.63049e-14	4.87639e-11	715.173	198.393	381.494	447.128	424.278	4.41383	19.8536	39.9049	27.9665	49.5173
7616	ENSG00000124882	EREG	protein_coding	134.583	5.35087	0.710595	7.53012	5.06935e-14	5.07163e-11	8.34508	4.47502	35.1283	0.856567	11.7042	60.3223	667.576	345.843	253.65	391.187
16528	ENSG00000198788	MUC2	protein_coding	8167.39	-3.77476	0.504348	-7.48445	7.18483e-14	6.84577e-11	19952.2	3394.3	10589.1	15199.8	18343.5	197.151	318.898	2084.45	926.797	2059.92
27910	ENSG00000265933	LINC00668	lincRNA	480.589	-2.56381	0.344054	-7.45177	9.20932e-14	8.37588e-11	978.878	1240.33	1176.8	1033.88	1328.43	261.151	212.185	184.658	165.848	143.6
17820	ENSG00000235505	AP002004.1	transcribed_unprocessed_pseudogene	97.4711	-2.79335	0.376424	-7.42075	1.16456e-13	1.01312e-10	156.053	213.309	106.79	209.002	231.159	20.5979	14.2697	36.7751	27.3161	34.6621
13838	ENSG00000171388	APLN	protein_coding	32.2481	4.32727	0.595195	7.27033	3.58604e-13	2.98971e-10	0	9.69588	5.62053	10.2788	0	26.483	140.216	89.9817	176.904	19.8069
1333	ENSG00000016490	CLCA1	protein_coding	16444	-7.29713	1.00574	-7.25548	4.00226e-13	3.20325e-10	31625.3	21390.6	44964.3	89046.1	2996.28	25.7473	17.3719	435.042	138.532	401.09
16419	ENSG00000184709	LRRC26	protein_coding	226.165	-4.55014	0.629548	-7.22763	4.91489e-13	3.78239e-10	535.754	132.759	390.627	278.384	692.013	1.47128	6.82466	71.2029	14.3085	37.138
31661	ENSG00000099953	MMP11	protein_coding	734.374	4.16329	0.576799	7.21792	5.27892e-13	3.91207e-10	79.2782	126.046	53.3951	52.2506	130.21	2101.72	2270.75	509.375	5182.91	267.393
16418	ENSG00000176884	GRIN1	protein_coding	51.9499	-3.91632	0.545351	-7.18129	6.90552e-13	4.93473e-10	65.9261	71.6003	68.8515	88.2264	111.19	3.67819	1.86127	13.3016	4.55269	4.95173
29213	ENSG00000197457	STMN3	protein_coding	177.618	3.01627	0.423787	7.11743	1.09962e-12	7.58698e-10	29.2078	49.2252	42.8566	71.095	45.3539	358.991	748.231	117.367	465.025	336.718
11811	ENSG00000106483	SFRP4	protein_coding	189.061	6.86311	0.967256	7.09544	1.28939e-12	8.5998e-10	0.834508	2.23751	4.2154	0	1.46303	818.765	590.643	37.5576	1324.83	7.42759
12557	ENSG00000105989	WNT2	protein_coding	44.9948	6.77698	0.956129	7.08794	1.36125e-12	8.78621e-10	1.66902	5.96669	0	0	0	139.771	155.106	57.9013	291.372	19.8069
22734	ENSG00000197249	SERPINA1	protein_coding	3004.06	-3.12867	0.444798	-7.03392	2.00813e-12	1.25565e-09	7893.61	2226.32	4629.91	7513.8	4349.59	728.281	452.909	555.539	421.449	643.725
11265	ENSG00000146469	VIP	protein_coding	58.6369	5.30814	0.7635	6.95237	3.59201e-12	2.17796e-09	2.50352	4.47502	0	1.71313	0	105.196	19.2331	50.8592	106.663	37.138
28508	ENSG00000171867	PRNP	protein_coding	369.157	1.58415	0.228173	6.94275	3.84549e-12	2.26307e-09	115.162	225.989	149.647	161.891	165.322	387.681	527.981	366.969	606.158	579.352
7604	ENSG00000169429	CXCL8	protein_coding	480.098	5.27404	0.768771	6.86035	6.869e-12	3.92691e-09	15.8556	36.546	10.5385	27.4101	36.5757	330.301	4101	502.333	1886.11	175.786
7722	ENSG00000118785	SPP1	protein_coding	348.829	6.61015	0.969519	6.81796	9.23402e-12	5.13232e-09	0	49.9711	0	6.85253	7.31515	1341.8	961.036	182.311	2498.13	51.9932
27129	ENSG00000167080	B4GALNT2	protein_coding	123.175	-5.38141	0.805209	-6.68325	2.33705e-11	1.26384e-08	302.092	378.885	136.298	492.526	90.7078	1.47128	0	10.1718	9.10538	17.3311
2221	ENSG00000158859	ADAMTS4	protein_coding	87.4816	4.30836	0.647618	6.65263	2.87897e-11	1.51593e-08	5.84155	15.6626	5.62053	10.2788	10.2412	75.7707	444.844	144.753	405.189	47.0414
860	ENSG00000117016	RIMS3	protein_coding	74.9899	-2.57785	0.389237	-6.62283	3.52391e-11	1.74978e-08	117.666	179.001	86.4157	101.931	178.49	7.35638	24.8169	35.2102	20.1619	24.7586
4496	ENSG00000123610	TNFAIP6	protein_coding	29.9951	6.66746	1.00767	6.61671	3.67288e-11	1.74978e-08	0	2.23751	0	0.856567	0	35.3106	228.316	10.9543	150.889	4.95173
4564	ENSG00000078098	FAP	protein_coding	95.5295	4.89252	0.739393	6.61694	3.66715e-11	1.74978e-08	4.17254	17.9001	2.1077	5.1394	2.92606	270.715	478.347	43.8172	554.778	2.47586
15802	ENSG00000106819	ASPN	protein_coding	110.079	5.15326	0.77788	6.62475	3.47848e-11	1.74978e-08	4.17254	16.4084	7.02567	7.7091	1.46303	107.403	512.47	76.6801	687.456	27.2345
29787	ENSG00000039987	BEST2	protein_coding	130.18	-5.29039	0.80825	-6.54549	5.93002e-11	2.72679e-08	198.613	75.3295	469.314	247.548	207.75	0	1.24085	8.60695	11.0565	37.138
31882	ENSG00000198125	MB	protein_coding	101.913	-4.42064	0.675543	-6.54383	5.99623e-11	2.72679e-08	332.134	58.9211	125.057	131.911	348.201	3.67819	0	21.1261	14.3085	14.8552
16382	ENSG00000177984	LCN15	protein_coding	208.077	-6.59203	1.01649	-6.48508	8.86834e-11	3.94326e-08	439.786	20.1376	1835.1	131.055	226.77	7.35638	0	1.5649	0	14.8552
3033	ENSG00000168243	GNG4	protein_coding	59.7195	4.32829	0.668404	6.47557	9.44552e-11	4.1086e-08	10.0141	4.47502	6.3231	7.7091	1.46303	130.944	210.944	12.5192	87.1515	279.773
8933	ENSG00000175426	PCSK1	protein_coding	183.44	-4.30658	0.665671	-6.46953	9.83063e-11	4.18513e-08	291.243	267.755	388.519	1326.82	133.136	105.932	41.5684	8.60695	10.4061	9.90346
6235	ENSG00000163515	RETNLB	protein_coding	137.534	-5.64502	0.87369	-6.46112	1.03929e-10	4.24393e-08	84.2853	434.823	491.797	791.468	51.206	2.94255	39.0867	1.5649	5.85346	4.95173
20241	ENSG00000161638	ITGA5	protein_coding	306.425	2.55475	0.395267	6.46337	1.024e-10	4.24393e-08	66.7606	167.813	54.8002	105.358	117.042	440.647	1033.01	401.397	1035.41	257.49
19848	ENSG00000174236	REP15	protein_coding	212.826	-4.10461	0.636762	-6.44606	1.14799e-10	4.59401e-08	584.155	239.414	503.74	738.361	117.042	4.41383	14.8902	66.5082	27.9665	17.3311
1473	ENSG00000060718	COL11A1	protein_coding	166.947	5.65683	0.879577	6.43131	1.26507e-10	4.96331e-08	3.33803	19.3918	8.4308	2.5697	4.38909	875.409	921.329	29.7331	608.76	17.3311
8948	ENSG00000174136	RGMB	protein_coding	629.883	-3.25428	0.510195	-6.3785	1.7883e-10	6.88118e-08	632.557	831.608	2591.77	2782.99	332.108	101.518	304.628	304.373	109.915	22.2828
8049	ENSG00000151617	EDNRA	protein_coding	90.2803	3.30503	0.518424	6.37514	1.82797e-10	6.90111e-08	11.6831	70.1087	11.9436	20.5576	8.77818	114.759	545.973	97.8062	224.383	131.221
32445	ENSG00000159263	SIM2	protein_coding	40.7258	3.56892	0.560784	6.36415	1.9637e-10	7.27624e-08	10.0141	7.45837	3.51283	5.1394	19.0194	64.7361	184.266	78.245	97.5576	111.414
21391	ENSG00000133110	POSTN	protein_coding	1309.04	3.44624	0.541933	6.35917	2.02848e-10	7.37962e-08	39.2219	751.804	156.672	465.116	59.9842	2064.93	6958.05	540.673	5939.96	297.104
19658	ENSG00000173391	OLR1	protein_coding	22.3038	5.37364	0.84809	6.33617	2.35544e-10	8.38603e-08	0.834508	3.72918	0.702567	0.856567	0	51.4946	147.04	15.649	107.313	2.47586
19847	ENSG00000256377	AC009509.1	antisense	167.627	-4.68281	0.739315	-6.33399	2.38894e-10	8.38603e-08	390.55	204.359	462.289	627.007	54.1321	5.14946	6.82466	57.9013	24.7146	0
382	ENSG00000117122	MFAP2	protein_coding	69.0753	3.4906	0.55153	6.32894	2.46844e-10	8.5157e-08	12.5176	20.1376	18.2667	5.99597	13.1673	228.048	169.996	94.6764	362.264	44.5656
17868	ENSG00000204381	LAYN	protein_coding	29.0195	3.37048	0.533748	6.31475	2.70596e-10	9.17689e-08	6.67606	8.95004	2.81027	12.8485	0	69.1499	72.5896	40.6874	101.46	14.8552
24403	ENSG00000167964	RAB26	protein_coding	125.545	-3.14604	0.498421	-6.31201	2.75429e-10	9.18511e-08	184.426	85.7712	115.221	107.927	242.863	19.1266	1.24085	21.9086	15.6092	47.0414
19286	ENSG00000066468	FGFR2	protein_coding	137.376	-2.37812	0.378554	-6.28211	3.34006e-10	1.09559e-07	237	173.78	310.534	310.934	121.431	36.0462	40.948	46.1645	81.9484	19.8069
454	ENSG00000076864	RAP1GAP	protein_coding	265.338	-3.06712	0.488945	-6.27293	3.54307e-10	1.14344e-07	350.493	223.751	731.372	711.807	327.719	34.575	8.68593	116.585	68.9407	74.2759
170	ENSG00000069424	KCNAB2	protein_coding	136.07	2.03226	0.324125	6.26999	3.61073e-10	1.14678e-07	29.2078	120.08	30.2104	65.0991	45.3539	218.484	235.761	115.02	318.688	222.828
13165	ENSG00000184368	MAP7D2	protein_coding	24.6702	5.4366	0.867807	6.26475	3.73416e-10	1.16745e-07	0	2.23751	2.1077	0.856567	0	11.7702	71.9691	28.1682	110.565	69.3242
1880	ENSG00000143387	CTSK	protein_coding	481.806	2.71425	0.435885	6.22699	4.7547e-10	1.45078e-07	85.9543	405.735	177.047	220.994	26.3345	1202.03	1281.8	823.137	2008.39	173.311
21730	ENSG00000198542	ITGBL1	protein_coding	41.0777	5.99507	0.962911	6.22598	4.78541e-10	1.45078e-07	1.66902	0.745837	0.702567	1.71313	0	172.875	107.954	5.47715	304.38	0
17933	ENSG00000110244	APOA4	protein_coding	393.571	-23.0948	3.71745	-6.21252	5.21408e-10	1.55714e-07	0	0	0	0	17.5564	0	0	0	0	0
2977	ENSG00000244137	AL512328.1	antisense	57.7599	-5.33405	0.864339	-6.17125	6.77512e-10	1.99358e-07	158.556	24.6126	68.8515	96.7921	162.396	0	0	4.6947	20.8123	0
8434	ENSG00000113361	CDH6	protein_coding	21.7006	3.62637	0.588354	6.16358	7.1117e-10	2.06229e-07	2.50352	4.47502	2.81027	8.56567	1.46303	50.0234	92.4431	30.5155	63.0873	12.3793
5004	ENSG00000115414	FN1	protein_coding	3450.24	3.4441	0.559487	6.15583	7.46873e-10	2.1301e-07	312.106	495.982	684.3	805.173	125.821	7524.1	25957.3	2372.39	8836.12	428.325
6183	ENSG00000144810	COL8A1	protein_coding	191.829	5.34932	0.869565	6.15172	7.66491e-10	2.1301e-07	2.50352	24.6126	18.9693	17.9879	0	638.534	939.321	169.792	957.365	54.469
7252	ENSG00000170801	HTRA3	protein_coding	281.297	3.58344	0.582365	6.15325	7.59126e-10	2.1301e-07	51.7395	32.8168	19.6719	30.8364	119.968	350.899	482.069	384.183	1449.71	304.531
26675	ENSG00000275385	CCL18	protein_coding	75.9665	3.40685	0.554311	6.14609	7.94147e-10	2.17673e-07	0.834508	11.9334	9.13337	25.697	17.5564	54.4372	405.137	81.3748	139.833	64.3725
4398	ENSG00000178162	FAR2P2	transcribed_unprocessed_pseudogene	29.4515	-5.10905	0.833647	-6.12856	8.86781e-10	2.39778e-07	2.50352	29.8335	61.1233	85.6567	117.042	0.735638	0	5.47715	1.30077	0
15112	ENSG00000160932	LY6E	protein_coding	579.775	2.64842	0.433017	6.1162	9.58347e-10	2.55674e-07	131.018	204.359	62.5284	114.78	272.123	333.98	805.31	1234.71	1387.27	1619.22
7769	ENSG00000172955	ADH6	protein_coding	142.677	-3.95101	0.650079	-6.07774	1.21888e-09	3.20902e-07	233.662	199.138	188.288	182.449	263.345	1.47128	2.48169	53.2066	18.2108	17.3311
3754	ENSG00000169604	ANTXR1	protein_coding	485.169	3.3539	0.553129	6.0635	1.3319e-09	3.46103e-07	31.7113	280.435	61.1233	119.919	40.9648	1400.65	2213.05	378.706	1968.06	138.648
1326	ENSG00000142871	CYR61	protein_coding	287.743	3.85912	0.637489	6.05363	1.41619e-09	3.63289e-07	11.6831	41.021	29.5078	62.5294	20.4824	421.52	599.329	593.097	1296.87	94.0829
794	ENSG00000183317	EPHA10	protein_coding	351.356	-2.43828	0.403253	-6.04654	1.47994e-09	3.74837e-07	358.004	431.094	363.227	355.475	640.807	47.0808	53.9769	199.525	51.3803	101.51
21122	ENSG00000214039	LINC02418	lincRNA	19.7851	6.99832	1.15789	6.04403	1.50308e-09	3.75938e-07	0	0.745837	0.702567	0	0	93.426	132.771	18.7788	42.9254	7.42759
3729	ENSG00000143995	MEIS1	protein_coding	74.336	3.67368	0.610398	6.0185	1.76037e-09	4.3425e-07	4.17254	20.1376	5.62053	7.7091	7.31515	141.978	243.827	64.9433	283.567	7.42759
17813	ENSG00000137745	MMP13	protein_coding	25.468	6.47154	1.07559	6.01674	1.77963e-09	4.3425e-07	0	0.745837	1.40513	0	0	44.8739	172.478	15.649	139.182	2.47586
4159	ENSG00000115616	SLC9A2	protein_coding	253.673	-2.49303	0.414651	-6.01235	1.82857e-09	4.40817e-07	393.888	457.944	519.899	610.732	234.085	60.3223	110.435	160.402	32.5192	64.3725
24320	ENSG00000116176	TPSG1	protein_coding	162.935	-3.48163	0.581249	-5.98992	2.09945e-09	5.00093e-07	464.821	70.8545	313.345	238.126	181.416	5.8851	4.96339	46.947	38.3727	37.138
9552	ENSG00000135083	CCNJL	protein_coding	110.739	-2.38951	0.399211	-5.98557	2.15628e-09	5.04828e-07	211.13	69.3628	108.195	197.867	194.583	23.5404	26.6782	21.1261	38.3727	34.6621
21731	ENSG00000102466	FGF14	protein_coding	29.3972	5.49948	0.918946	5.98456	2.16978e-09	5.04828e-07	3.33803	0.745837	0	1.71313	0	124.323	64.5241	4.6947	217.228	0
2748	ENSG00000123689	G0S2	protein_coding	101.493	3.80729	0.637447	5.97273	2.3332e-09	5.30512e-07	6.67606	23.8668	33.7232	22.2707	8.77818	66.2074	351.78	182.311	386.328	190.642
6336	ENSG00000163430	FSTL1	protein_coding	926.873	2.38017	0.398413	5.97412	2.31342e-09	5.30512e-07	181.088	575.786	311.237	545.633	158.007	2018.59	3162.92	1524.21	3426.87	398.614
11610	ENSG00000122691	TWIST1	protein_coding	20.0506	4.05171	0.678863	5.96838	2.3962e-09	5.38714e-07	1.66902	8.20421	1.40513	3.42627	0	27.9542	118.501	10.1718	118.37	4.95173
28668	ENSG00000101463	SYNDIG1	protein_coding	16.7649	4.44079	0.744339	5.96609	2.43001e-09	5.40245e-07	0.834508	5.22086	0	2.5697	1.46303	29.4255	45.2909	15.649	97.5576	9.90346
2978	ENSG00000135773	CAPN9	protein_coding	248.403	-3.96949	0.66762	-5.94573	2.75236e-09	6.05186e-07	505.712	165.576	397.653	555.055	475.484	4.41383	1.24085	76.6801	65.0384	34.6621
24076	ENSG00000182054	IDH2	protein_coding	1489.65	-1.29064	0.217776	-5.92645	3.0955e-09	6.73237e-07	2206.44	1442.45	2298.1	1823.63	2364.26	753.293	755.056	1011.71	604.857	1022.53
27169	ENSG00000108821	COL1A1	protein_coding	4567.09	3.21092	0.543104	5.91217	3.37629e-09	7.2641e-07	398.06	1555.07	612.638	989.335	1448.4	10816.8	19076.2	3301.94	22226.9	1797.48
26378	ENSG00000072210	ALDH3A2	protein_coding	637.892	-1.32432	0.224676	-5.89434	3.76178e-09	8.00739e-07	1112.4	980.775	1071.41	690.393	892.448	455.36	419.406	481.989	282.267	284.724
17627	ENSG00000254988	AP002498.1	antisense	32.199	-3.85572	0.654757	-5.88878	3.89056e-09	8.19434e-07	84.2853	29.0876	30.9129	40.2586	73.1515	0	1.86127	7.8245	3.9023	7.42759
473	ENSG00000133216	EPHB2	protein_coding	1249.61	-1.51142	0.256967	-5.88176	4.05917e-09	8.44707e-07	2297.4	1807.91	1718.48	1947.83	3018.23	706.212	711.006	634.567	706.968	1005.2
1508	ENSG00000116299	KIAA1324	protein_coding	1189.74	-2.9225	0.497141	-5.87861	4.1372e-09	8.44707e-07	1682.37	1469.3	4025	3361.17	1056.31	111.817	259.958	864.607	453.968	84.1794
5123	ENSG00000171951	SCG2	protein_coding	27.6114	4.689	0.797614	5.87879	4.13279e-09	8.44707e-07	0.834508	0	2.1077	1.71313	0	42.667	19.8536	21.1261	46.8277	4.95173
1083	ENSG00000157184	CPT2	protein_coding	348.386	-1.71188	0.291304	-5.87661	4.18753e-09	8.46346e-07	525.74	454.215	477.745	413.722	409.648	136.093	139.595	261.338	135.93	71.8001
18802	ENSG00000122861	PLAU	protein_coding	371.692	3.04299	0.518106	5.8733	4.27212e-09	8.54809e-07	80.9473	176.018	50.5848	87.3698	119.968	518.625	1462.34	856	1564.17	277.297
9735	ENSG00000087116	ADAMTS2	protein_coding	143.873	3.9496	0.673	5.86864	4.39375e-09	8.70441e-07	2.50352	34.3085	9.83593	31.693	33.6497	252.324	751.953	117.367	720.626	37.138
10416	ENSG00000124664	SPDEF	protein_coding	331.96	-3.32567	0.566988	-5.8655	4.47786e-09	8.78406e-07	675.951	134.996	424.35	356.332	652.511	8.82765	9.30636	143.971	78.0461	56.9449
11586	ENSG00000006468	ETV1	protein_coding	38.0266	2.28856	0.390896	5.85466	4.77998e-09	9.28569e-07	16.6902	28.3418	9.83593	12.8485	7.31515	86.8052	117.26	70.4205	82.5988	12.3793
16329	ENSG00000130635	COL5A1	protein_coding	663.519	2.45125	0.419548	5.84258	5.13971e-09	9.8885e-07	90.1268	403.498	214.985	310.934	172.637	1382.26	2373.74	741.763	2580.07	319.387
11212	ENSG00000203727	SAMD5	protein_coding	287.523	-3.22604	0.552478	-5.83922	5.24447e-09	9.90142e-07	334.638	496.727	654.089	705.811	526.691	78.7132	9.92678	218.304	22.7634	64.3725
26824	ENSG00000108244	KRT23	protein_coding	65.0385	4.07727	0.698259	5.83919	5.24539e-09	9.90142e-07	23.3662	1.49167	4.91797	33.4061	1.46303	257.473	14.2697	173.704	161.946	302.055
1170	ENSG00000240563	L1TD1	protein_coding	326.385	-4.16638	0.71382	-5.83674	5.32308e-09	9.95416e-07	811.976	732.412	456.668	2202.23	280.902	38.2532	86.8593	136.146	6.50384	14.8552
9854	ENSG00000198721	ECI2	protein_coding	399.852	-1.44554	0.247806	-5.83335	5.43268e-09	1.00424e-06	562.458	388.581	537.463	425.714	510.597	155.22	119.121	259.773	203.57	180.738
12698	ENSG00000085662	AKR1B1	protein_coding	252.141	1.62676	0.278928	5.83218	5.47062e-09	1.00424e-06	61.7536	134.996	80.7952	113.923	87.7818	223.634	402.035	228.475	281.616	324.338
31790	ENSG00000099985	OSM	protein_coding	31.7121	6.95411	1.19542	5.8173	5.9805e-09	1.08785e-06	0	1.49167	0	1.71313	0	13.9771	158.828	56.3364	201.619	22.2828
25788	ENSG00000129993	CBFA2T3	protein_coding	93.7115	-2.63204	0.45438	-5.7926	6.93065e-09	1.23817e-06	157.722	88.0088	86.4157	160.178	168.248	16.184	11.788	47.7294	13.6581	19.8069
30967	ENSG00000186474	KLK12	protein_coding	47.5525	-4.76742	0.822874	-5.79362	6.88852e-09	1.23817e-06	253.69	7.45837	122.247	203.863	49.743	11.0346	0.620424	22.691	0	0
6265	ENSG00000091986	CCDC80	protein_coding	234.532	2.82906	0.489129	5.78387	7.30004e-09	1.28901e-06	11.6831	57.4294	35.8309	57.39	16.0933	267.772	393.969	122.845	716.723	24.7586
24045	ENSG00000157766	ACAN	protein_coding	24.1249	4.20182	0.726599	5.78286	7.34404e-09	1.28901e-06	1.66902	5.22086	1.40513	4.28283	5.85212	44.1383	139.595	16.4314	98.8584	32.1862
9489	ENSG00000113140	SPARC	protein_coding	3979.52	2.78415	0.481684	5.78004	7.46816e-09	1.2994e-06	519.064	1944.4	824.813	1266.86	779.795	10102.5	14734.4	4060.13	18952.8	1416.19
6745	ENSG00000180044	C3orf80	protein_coding	13.9728	4.60926	0.799666	5.76398	8.21529e-09	1.41707e-06	0	3.72918	0.702567	1.71313	1.46303	24.276	66.3853	16.4314	63.7376	7.42759
14236	ENSG00000168453	HR	protein_coding	484.134	-2.07088	0.359715	-5.75701	8.56167e-09	1.45178e-06	944.663	482.556	387.817	525.932	1366.47	158.898	118.501	154.143	113.167	344.145
15919	ENSG00000119508	NR4A3	protein_coding	21.1174	4.4545	0.773566	5.7584	8.49129e-09	1.45178e-06	1.66902	2.23751	0	4.28283	2.92606	11.7702	124.705	25.8208	87.1515	12.3793
4944	ENSG00000118257	NRP2	protein_coding	114.989	2.73317	0.474899	5.75527	8.65037e-09	1.4545e-06	25.0352	42.5127	19.6719	34.2627	30.7236	324.416	355.503	107.196	444.863	39.6138
19807	ENSG00000060982	BCAT1	protein_coding	69.5424	3.58153	0.624017	5.73947	9.49726e-09	1.58359e-06	3.33803	31.3251	6.3231	6.85253	10.2412	164.783	315.175	67.2907	215.928	22.2828
2721	ENSG00000162892	IL24	protein_coding	50.8232	3.9437	0.687363	5.73743	9.61216e-09	1.5895e-06	1.66902	5.22086	6.3231	9.42224	2.92606	30.1611	312.073	16.4314	239.992	19.8069
9765	ENSG00000131459	GFPT2	protein_coding	30.4466	4.10234	0.715448	5.73394	9.81239e-09	1.60931e-06	3.33803	3.72918	4.2154	5.1394	0	55.1728	156.347	9.3894	152.19	4.95173
31176	ENSG00000095752	IL11	protein_coding	61.6634	5.02878	0.878461	5.72453	1.03722e-08	1.68729e-06	2.50352	5.22086	2.1077	4.28283	1.46303	5.8851	429.333	81.3748	369.418	14.8552
31639	ENSG00000133519	ZDHHC8P1	transcribed_unprocessed_pseudogene	119.294	-3.84626	0.672342	-5.72069	1.06092e-08	1.71192e-06	76.7747	55.1919	124.354	173.883	383.314	3.67819	3.10212	22.691	13.6581	14.8552
6564	ENSG00000114107	CEP70	protein_coding	152.654	-1.74178	0.304623	-5.7178	1.0791e-08	1.72734e-06	233.662	178.255	337.232	241.552	215.065	51.4946	52.736	97.8062	68.9407	94.0829
12265	ENSG00000164692	COL1A2	protein_coding	5471.09	2.99257	0.523741	5.71383	1.10461e-08	1.74396e-06	437.282	2631.31	1047.53	1383.36	1054.84	14983.5	22419.6	4322.25	23463.9	1666.26
18336	ENSG00000165995	CACNB2	protein_coding	79.1314	-2.50007	0.437593	-5.71322	1.1086e-08	1.74396e-06	123.507	105.163	132.083	197.01	122.894	36.0462	21.7148	28.9506	34.4704	9.90346
30955	ENSG00000142515	KLK3	protein_coding	49.8441	-4.98005	0.871836	-5.71214	1.11563e-08	1.74396e-06	99.3064	33.5627	158.077	101.931	89.2448	0.735638	1.24085	2.34735	9.75576	7.42759
2338	ENSG00000007908	SELE	protein_coding	31.5464	5.65824	0.998567	5.66636	1.45865e-08	2.26249e-06	0.834508	3.72918	1.40513	2.5697	0	20.5979	189.229	57.1188	169.1	12.3793
1128	ENSG00000233271	AL590440.1	antisense	20.0593	-3.67658	0.649915	-5.65702	1.5402e-08	2.37061e-06	56.7465	12.6792	30.2104	43.6849	16.0933	1.47128	1.24085	7.04205	3.25192	0
28300	ENSG00000141655	TNFRSF11A	protein_coding	382.507	-2.055	0.364577	-5.63666	1.73375e-08	2.64814e-06	542.43	682.441	799.521	723.799	358.442	189.059	203.499	268.38	93.6553	54.469
11636	ENSG00000136244	IL6	protein_coding	67.2998	6.52318	1.15779	5.63415	1.75925e-08	2.66672e-06	0	0.745837	1.40513	4.28283	0	5.8851	406.998	25.0384	537.868	17.3311
1264	ENSG00000117069	ST6GALNAC5	protein_coding	17.3549	5.17044	0.921101	5.61332	1.98476e-08	2.98594e-06	0.834508	0.745837	2.1077	0.856567	0	47.8164	88.7206	10.1718	55.933	4.95173
18721	ENSG00000107719	PALD1	protein_coding	100.839	3.11094	0.554381	5.61155	2.00517e-08	2.99413e-06	18.3592	54.4461	66.0413	37.6889	4.38909	274.393	295.322	207.349	247.796	143.6
4788	ENSG00000204262	COL5A2	protein_coding	876.531	2.90349	0.517792	5.60743	2.05348e-08	3.04357e-06	85.9543	607.857	158.077	293.802	122.894	1700.79	4740.66	856.783	2996.32	354.049
18172	ENSG00000255545	AP004608.1	processed_transcript	217.871	-1.87308	0.334223	-5.6043	2.09094e-08	3.07629e-06	249.518	416.923	383.601	579.896	348.201	99.3111	201.017	92.3291	119.671	47.0414
16927	ENSG00000187479	C11orf96	protein_coding	184.274	2.79794	0.499435	5.60222	2.11619e-08	3.09072e-06	39.2219	38.7835	16.159	46.2546	48.28	81.6558	382.181	291.071	672.497	163.407
15740	ENSG00000180447	GAS1	protein_coding	21.495	5.98093	1.06798	5.60024	2.14059e-08	3.1037e-06	0	0.745837	0.702567	1.71313	0	49.2877	138.354	4.6947	103.411	2.47586
18936	ENSG00000185745	IFIT1	protein_coding	79.3263	2.72397	0.486965	5.59377	2.22196e-08	3.19851e-06	9.17959	59.6669	23.1847	21.4142	5.85212	27.2186	222.112	209.697	236.089	51.9932
7160	ENSG00000068078	FGFR3	protein_coding	425.63	-2.76878	0.496176	-5.58024	2.40193e-08	3.43288e-06	527.409	261.043	385.006	357.188	898.3	34.575	16.131	133.016	45.5269	299.58
8831	ENSG00000113296	THBS4	protein_coding	78.9803	5.05574	0.906961	5.57437	2.48428e-08	3.52539e-06	7.51057	5.22086	4.2154	1.71313	0	102.989	201.017	12.5192	800.623	12.3793
17195	ENSG00000168539	CHRM1	protein_coding	19.9823	-4.02962	0.723201	-5.57192	2.51948e-08	3.55017e-06	43.3944	6.71253	52.6925	37.6889	39.5018	3.67819	0	7.04205	0.650384	0
20602	ENSG00000139329	LUM	protein_coding	1732.03	2.96946	0.53344	5.56662	2.59734e-08	3.63427e-06	154.384	1272.4	529.033	494.239	93.6339	4436.63	6211.68	2073.49	6538.31	666.008
7523	ENSG00000171476	HOPX	protein_coding	71.2739	3.26648	0.589673	5.53947	3.03395e-08	4.21572e-06	15.0211	10.4417	14.0513	15.4182	11.7042	216.277	243.827	53.2066	348.606	22.2828
4272	ENSG00000125538	IL1B	protein_coding	106.491	3.61516	0.65403	5.52751	3.24817e-08	4.47974e-06	28.3733	27.596	19.6719	13.7051	11.7042	66.943	518.674	183.093	392.182	86.6553
21288	ENSG00000180730	SHISA2	protein_coding	21.9543	5.9662	1.07958	5.5264	3.26874e-08	4.47974e-06	0	6.71253	0	0.856567	0	125.794	44.6705	14.0841	125.524	4.95173
7607	ENSG00000163739	CXCL1	protein_coding	668.267	2.31514	0.420547	5.50507	3.69017e-08	5.0229e-06	287.071	349.797	161.59	297.229	509.134	1271.92	1631.09	1030.49	1897.17	1844.52
13113	ENSG00000198759	EGFL6	protein_coding	21.5114	4.5373	0.824875	5.5006	3.78508e-08	5.11727e-06	1.66902	17.9001	0.702567	0	2.92606	60.3223	103.611	44.5996	65.6888	22.2828
11648	ENSG00000136235	GPNMB	protein_coding	578.398	2.75846	0.501708	5.49814	3.83809e-08	5.15412e-06	38.3874	337.118	155.97	91.6527	54.1321	1175.55	1052.86	426.435	1525.8	195.593
20685	ENSG00000238105	GOLGA2P5	transcribed_unprocessed_pseudogene	234.937	-1.59957	0.291027	-5.49628	3.87895e-08	5.17426e-06	372.19	355.764	256.437	373.463	286.754	86.0696	109.815	118.932	94.9561	143.6
26493	ENSG00000179761	PIPOX	protein_coding	28.4706	4.62006	0.841009	5.49348	3.94098e-08	5.22219e-06	1.66902	1.49167	1.40513	0.856567	2.92606	18.3909	44.0501	2.34735	56.5834	247.586
14613	ENSG00000137573	SULF1	protein_coding	944.697	3.82193	0.698057	5.4751	4.37261e-08	5.75602e-06	12.5176	396.039	148.242	173.883	38.0388	3127.93	5162.55	823.92	3627.19	141.124
26217	ENSG00000006740	ARHGAP44	protein_coding	330.958	-2.28648	0.418094	-5.46882	4.53042e-08	5.92479e-06	227.821	466.894	618.259	501.092	352.59	51.4946	166.274	106.413	63.0873	59.4207
29014	ENSG00000196562	SULF2	protein_coding	755.267	1.69659	0.31037	5.46635	4.59393e-08	5.96883e-06	216.972	710.783	389.924	394.877	282.365	1647.83	2050.5	704.205	1382.07	718.001
2605	ENSG00000249007	AL691482.3	sense_intronic	34.2002	3.09383	0.566681	5.45956	4.77317e-08	6.10214e-06	5.00705	8.95004	13.3488	9.42224	2.92606	110.346	58.9402	57.1188	81.298	42.0897
27939	ENSG00000168461	RAB31	protein_coding	274.322	2.82939	0.518245	5.45957	4.77287e-08	6.10214e-06	40.8909	158.117	77.9849	71.095	27.7976	571.59	1170.12	280.9	1110.86	84.1794
31136	ENSG00000186818	LILRB4	protein_coding	89.596	2.3104	0.423227	5.45901	4.78803e-08	6.10214e-06	12.5176	43.2585	21.7796	32.5495	24.8715	218.484	121.603	110.325	163.897	71.8001
1332	ENSG00000137975	CLCA2	protein_coding	15.0735	-6.28713	1.15741	-5.43206	5.5707e-08	7.01033e-06	40.0564	21.6293	28.1027	71.095	2.92606	0	0.620424	0	0	2.47586
5022	ENSG00000115457	IGFBP2	protein_coding	1354.32	-2.8105	0.517302	-5.433	5.54145e-08	7.01033e-06	6014.3	1297.01	1052.44	1864.75	5884.3	930.582	53.3564	587.62	334.297	586.78
11053	ENSG00000146374	RSPO3	protein_coding	16.0867	5.01113	0.923252	5.42769	5.70869e-08	7.1284e-06	0.834508	0.745837	0.702567	0.856567	0	40.4601	40.948	7.04205	48.1284	0
13089	ENSG00000011201	ANOS1	protein_coding	37.5471	3.88676	0.716209	5.42685	5.73578e-08	7.1284e-06	3.33803	14.9167	4.2154	2.5697	2.92606	104.461	219.63	32.0804	157.393	2.47586
6579	ENSG00000114115	RBP1	protein_coding	123.915	2.46723	0.454813	5.42471	5.80475e-08	7.16958e-06	57.581	27.596	27.4001	19.701	29.2606	214.806	94.9248	439.737	259.503	69.3242
18545	ENSG00000204175	GPRIN2	protein_coding	154.141	-2.31418	0.428365	-5.40236	6.57692e-08	8.07347e-06	125.176	122.317	141.216	89.9395	326.256	6.62074	29.1599	70.4205	20.1619	69.3242
1284	ENSG00000137959	IFI44L	protein_coding	92.281	3.51279	0.651377	5.39287	6.93409e-08	8.46001e-06	6.67606	61.9045	11.9436	5.99597	11.7042	22.0691	381.561	268.38	251.048	61.8966
17601	ENSG00000166391	MOGAT2	protein_coding	679.396	-2.1585	0.400602	-5.38815	7.11876e-08	8.63268e-06	696.814	757.024	825.516	679.258	655.437	149.334	64.5241	192.483	199.668	230.255
30952	ENSG00000167748	KLK1	protein_coding	1021.36	-3.35999	0.624016	-5.38446	7.26607e-08	8.75824e-06	1977.78	362.477	1665.79	740.074	2803.16	68.4143	11.1676	280.117	316.087	314.435
2533	ENSG00000090104	RGS1	protein_coding	421.783	4.26772	0.794596	5.37094	7.83285e-08	9.38488e-06	11.6831	29.0876	28.1027	94.2224	21.9454	1180.7	578.235	1275.39	1134.27	155.979
11535	ENSG00000236609	ZNF853	protein_coding	31.4688	2.58492	0.481607	5.36728	7.9931e-08	9.51988e-06	3.33803	6.71253	14.7539	8.56567	8.77818	27.2186	50.8747	71.9854	76.0949	22.2828
16438	ENSG00000260996	BX255925.1	sense_overlapping	33.7874	-2.61316	0.487127	-5.36443	8.1206e-08	9.6145e-06	48.4014	43.2585	29.5078	23.9839	76.0775	6.62074	1.86127	7.04205	7.80461	17.3311
10511	ENSG00000124731	TREM1	protein_coding	16.804	4.44603	0.832016	5.34368	9.10786e-08	1.072e-05	6.67606	2.23751	0	2.5697	2.92606	35.3106	75.6917	33.6453	63.0873	24.7586
17344	ENSG00000174807	CD248	protein_coding	195.758	3.00061	0.56261	5.33337	9.64087e-08	1.1281e-05	26.7042	37.2918	25.2924	16.2748	100.949	242.025	416.925	146.318	669.896	131.221
11002	ENSG00000178033	CALHM5	protein_coding	27.1213	3.22472	0.60562	5.32465	1.01146e-07	1.17665e-05	3.33803	4.47502	6.3231	16.2748	1.46303	46.3452	98.6474	34.4278	117.72	7.42759
17139	ENSG00000134824	FADS2	protein_coding	128.828	3.10097	0.584056	5.30937	1.10006e-07	1.27232e-05	27.5388	49.9711	23.8873	35.1192	17.5564	108.139	179.923	121.28	397.385	732.856
17449	ENSG00000172927	MYEOV	protein_coding	67.6511	2.9425	0.554393	5.30761	1.1107e-07	1.27725e-05	30.0423	50.7169	4.91797	5.99597	29.2606	92.6903	271.746	169.792	152.19	141.124
23079	ENSG00000182636	NDN	protein_coding	99.7491	2.10164	0.396047	5.30654	1.11725e-07	1.27743e-05	16.6902	38.7835	63.231	36.8324	5.85212	97.1042	128.428	110.325	213.326	76.7518
14282	ENSG00000159167	STC1	protein_coding	71.9244	4.40475	0.8315	5.29735	1.17493e-07	1.33575e-05	9.17959	17.1542	2.81027	6.85253	16.0933	89.0122	420.027	97.0238	335.598	24.7586
12702	ENSG00000122786	CALD1	protein_coding	1180.65	2.64102	0.498776	5.29501	1.19011e-07	1.34537e-05	111.824	695.866	389.222	535.354	153.618	2543.84	4352.89	1535.17	4328.96	433.276
30760	ENSG00000197380	DACT3	protein_coding	33.6904	2.82662	0.534061	5.29269	1.20529e-07	1.35486e-05	2.50352	11.9334	8.4308	9.42224	4.38909	38.9888	80.0347	30.5155	106.663	14.8552
22261	ENSG00000168229	PTGDR	protein_coding	62.4321	-3.38295	0.640934	-5.27816	1.30489e-07	1.45863e-05	50.0705	105.909	207.96	226.99	33.6497	2.20691	17.9923	56.3364	3.9023	4.95173
21880	ENSG00000165794	SLC39A2	protein_coding	16.6856	-5.12222	0.97146	-5.27271	1.34427e-07	1.49431e-05	5.84155	5.22086	161.59	33.4061	17.5564	0.735638	0	5.47715	0	0
486	ENSG00000204219	TCEA3	protein_coding	1397.36	-2.54719	0.483271	-5.27073	1.35885e-07	1.49905e-05	1438.69	727.191	1342.6	930.232	3217.2	166.99	45.9114	528.936	266.007	601.635
9448	ENSG00000183111	ARHGEF37	protein_coding	160.363	-1.74354	0.330837	-5.2701	1.36352e-07	1.49905e-05	176.081	223.005	184.775	190.158	355.516	53.7016	55.8381	88.4168	76.0949	42.0897
24486	ENSG00000262370	AC108134.3	lincRNA	39.339	3.5488	0.673734	5.26736	1.38399e-07	1.51323e-05	2.50352	10.4417	6.3231	11.9919	5.85212	208.185	86.2389	10.1718	85.8507	81.7035
5274	ENSG00000115648	MLPH	protein_coding	1180.58	-2.17172	0.412623	-5.26321	1.41564e-07	1.53943e-05	3354.72	947.213	1627.85	1469.87	3231.83	808.466	307.73	578.231	317.387	272.345
20603	ENSG00000011465	DCN	protein_coding	1314.73	2.53248	0.481727	5.25709	1.46353e-07	1.58291e-05	80.1127	854.729	392.735	567.047	89.2448	2473.95	2863.26	1345.81	4450.58	354.049
23926	ENSG00000140379	BCL2A1	protein_coding	33.0923	3.0285	0.576792	5.2506	1.51607e-07	1.63091e-05	8.34508	11.9334	5.62053	18.8445	2.92606	55.9085	87.4797	66.5082	78.0461	44.5656
1517	ENSG00000174151	CYB561D1	protein_coding	159.614	-1.17801	0.22532	-5.22816	1.71203e-07	1.83187e-05	216.138	240.905	222.011	208.146	212.139	90.4834	91.8227	118.15	81.9484	108.938
28663	ENSG00000170373	CST1	protein_coding	236.911	4.39232	0.843022	5.2102	1.88633e-07	2.00764e-05	15.0211	7.45837	16.159	8.56567	43.8909	2526.18	190.47	590.75	59.185	89.1311
9212	ENSG00000226306	NPY6R	transcribed_processed_pseudogene	51.9342	-4.97408	0.955907	-5.20351	1.95556e-07	2.07031e-05	35.0493	59.6669	40.7489	119.063	179.953	2.20691	0	11.7367	0.650384	7.42759
16713	ENSG00000148926	ADM	protein_coding	179.172	1.73487	0.33387	5.19625	2.03351e-07	2.1415e-05	100.975	87.2629	66.0413	77.091	74.6145	243.496	346.817	369.316	282.917	163.407
26582	ENSG00000141314	RHBDL3	protein_coding	17.221	-4.87623	0.939847	-5.18832	2.12194e-07	2.22293e-05	25.0352	16.4084	17.5642	139.62	13.1673	0.735638	0.620424	2.34735	0.650384	0
17153	ENSG00000255126	AP003064.1	antisense	70.6355	-3.27213	0.630912	-5.18635	2.14453e-07	2.23489e-05	177.75	84.2796	75.8772	148.186	149.229	10.2989	11.1676	58.6837	16.91	0
6141	ENSG00000206538	VGLL3	protein_coding	21.0699	3.92851	0.758116	5.18193	2.19598e-07	2.27665e-05	0.834508	5.22086	4.2154	5.1394	0	51.4946	94.9248	46.1645	53.9819	4.95173
32649	ENSG00000210154	MT-TD	Mt_tRNA	21.9585	-3.22011	0.624695	-5.15469	2.54057e-07	2.62032e-05	30.8768	23.1209	11.2411	25.697	21.9454	2.20691	3.10212	3.1298	2.60154	0
18412	ENSG00000165757	JCAD	protein_coding	57.5383	2.87728	0.558508	5.15172	2.58111e-07	2.64848e-05	9.17959	32.8168	7.72823	22.2707	5.85212	94.1616	223.353	47.7294	286.169	12.3793
2349	ENSG00000116132	PRRX1	protein_coding	109.311	3.46952	0.674612	5.14298	2.70414e-07	2.76057e-05	5.84155	23.8668	24.5898	12.8485	20.4824	275.128	637.175	35.2102	468.927	44.5656
17151	ENSG00000162174	ASRGL1	protein_coding	210.446	-2.40192	0.467828	-5.1342	2.83341e-07	2.87785e-05	347.99	285.656	286.647	484.817	339.423	27.2186	58.9402	232.388	56.5834	47.0414
16941	ENSG00000019505	SYT13	protein_coding	514.868	-1.58697	0.309258	-5.13154	2.87376e-07	2.90409e-05	741.043	366.206	533.951	447.984	1147.01	165.518	170.617	217.521	192.514	274.821
21236	ENSG00000150457	LATS2	protein_coding	58.3387	2.32057	0.453395	5.11821	3.08447e-07	3.10136e-05	18.3592	41.7669	25.2924	29.1233	7.31515	138.3	217.148	75.8976	129.426	54.469
18028	ENSG00000154096	THY1	protein_coding	656.303	2.44496	0.477966	5.11534	3.13173e-07	3.13314e-05	130.183	392.31	162.293	214.142	463.78	1424.93	1793.02	799.664	2849.98	403.566
30781	ENSG00000197405	C5AR1	protein_coding	61.0151	2.41899	0.473382	5.11001	3.22135e-07	3.20676e-05	20.8627	25.3585	16.8616	45.398	4.38909	108.139	156.347	104.848	162.596	49.5173
2237	ENSG00000143226	FCGR2A	protein_coding	141.565	2.17839	0.42658	5.10663	3.27955e-07	3.24854e-05	25.0352	128.284	40.0463	64.2425	27.7976	380.325	311.453	140.059	342.752	99.0346
16733	ENSG00000050165	DKK3	protein_coding	388.67	2.25558	0.44255	5.09677	3.45493e-07	3.38871e-05	65.0916	318.472	133.488	119.063	169.711	726.81	1250.15	618.918	1196.71	235.207
24122	ENSG00000258647	LINC00930	lincRNA	17.0166	-5.80416	1.13872	-5.09708	3.44941e-07	3.38871e-05	69.2641	32.071	11.9436	50.5374	20.4824	0	0	0.78245	0	4.95173
32640	ENSG00000210112	MT-TM	Mt_tRNA	27.931	-4.07435	0.800148	-5.09199	3.54321e-07	3.45835e-05	33.3803	26.8501	18.2667	18.8445	70.2254	0	1.24085	3.1298	7.15423	0
593	ENSG00000142765	SYTL1	protein_coding	458.857	-2.53325	0.497853	-5.08835	3.61189e-07	3.50827e-05	1237.57	297.589	491.094	404.3	1566.9	203.036	22.9557	176.834	93.0049	212.924
14503	ENSG00000196711	ALKAL1	protein_coding	15.916	4.0629	0.799175	5.08386	3.69835e-07	3.57489e-05	3.33803	2.23751	5.62053	0.856567	0	105.932	39.7071	31.298	43.5757	2.47586
9208	ENSG00000152377	SPOCK1	protein_coding	50.3111	4.15109	0.818289	5.07289	3.91813e-07	3.76241e-05	5.84155	19.3918	2.81027	5.99597	0	133.886	268.643	21.1261	243.894	2.47586
10715	ENSG00000112280	COL9A1	protein_coding	65.3918	2.95064	0.581713	5.07232	3.92995e-07	3.76241e-05	7.51057	17.1542	18.2667	30.8364	13.1673	371.497	89.341	74.3327	271.21	32.1862
18932	ENSG00000138135	CH25H	protein_coding	48.4665	2.55988	0.505235	5.06671	4.04749e-07	3.85649e-05	7.51057	19.3918	7.72823	24.8404	13.1673	61.7936	55.2177	168.227	126.825	42.0897
11076	ENSG00000164484	TMEM200A	protein_coding	91.6819	3.03399	0.599492	5.06093	4.1722e-07	3.95647e-05	5.00705	43.2585	57.6105	27.4101	0	74.2994	374.736	172.921	129.426	66.8483
19045	ENSG00000155265	GOLGA7B	protein_coding	61.1311	1.88524	0.373293	5.05031	4.41104e-07	4.16323e-05	43.3944	17.9001	33.0206	21.4142	27.7976	164.047	74.4508	82.9397	74.7942	146.076
17034	ENSG00000149131	SERPING1	protein_coding	532.556	2.04224	0.40481	5.04493	4.53696e-07	4.26198e-05	93.4649	360.239	127.165	256.113	112.653	1056.38	655.167	618.135	1577.83	207.973
8056	ENSG00000071205	ARHGAP10	protein_coding	44.4428	2.11945	0.420533	5.03992	4.65726e-07	4.35454e-05	4.17254	13.4251	18.2667	20.5576	14.6303	58.851	53.3564	41.4698	106.013	39.6138
19346	ENSG00000148848	ADAM12	protein_coding	56.6914	3.58119	0.710798	5.03827	4.69768e-07	4.3719e-05	8.34508	8.20421	4.91797	14.5616	4.38909	278.071	248.169	15.649	221.131	4.95173
15266	ENSG00000197646	PDCD1LG2	protein_coding	13.931	3.51524	0.698877	5.02984	4.90881e-07	4.52628e-05	1.66902	4.47502	0	5.99597	0	36.0462	30.4008	11.7367	29.2673	7.42759
29721	ENSG00000130176	CNN1	protein_coding	215.343	3.12472	0.621146	5.03058	4.89008e-07	4.52628e-05	8.34508	23.1209	56.9079	24.8404	59.9842	254.531	281.052	135.364	1025.66	54.469
5900	ENSG00000114378	HYAL1	protein_coding	105.165	-2.93279	0.5833	-5.02793	4.9581e-07	4.55076e-05	347.99	249.11	97.6568	66.8122	383.314	13.9771	6.82466	39.1225	18.8611	118.841
23991	ENSG00000166503	HDGFL3	protein_coding	107.49	2.44707	0.487662	5.01797	5.22215e-07	4.77123e-05	15.8556	57.4294	64.6361	55.6768	11.7042	147.863	289.738	136.146	206.172	185.69
30841	ENSG00000174951	FUT1	protein_coding	23.7842	2.84226	0.566857	5.01406	5.32925e-07	4.84695e-05	15.8556	5.96669	2.81027	2.5697	10.2412	33.8393	39.7071	61.0311	27.3161	101.51
21824	ENSG00000184497	TMEM255B	protein_coding	52.1539	2.37836	0.474895	5.00819	5.49438e-07	4.97452e-05	18.3592	26.8501	5.62053	14.5616	21.9454	127.265	52.736	23.4735	195.115	126.269
23789	ENSG00000129038	LOXL1	protein_coding	67.6943	2.46677	0.493041	5.00316	5.63979e-07	5.08318e-05	7.51057	32.8168	16.8616	29.1233	24.8715	130.208	125.326	89.9817	331.696	32.1862
15747	ENSG00000135047	CTSL	protein_coding	503.947	1.48467	0.297396	4.99224	5.96835e-07	5.35519e-05	226.986	410.21	299.293	268.962	231.159	798.167	1011.91	640.044	1389.22	378.807
6301	ENSG00000185565	LSAMP	protein_coding	52.2777	2.44203	0.489339	4.99047	6.02324e-07	5.3564e-05	10.0141	58.9211	14.0513	19.701	8.77818	141.242	192.952	68.8556	173.002	17.3311
16294	ENSG00000170827	CELP	transcribed_unprocessed_pseudogene	53.8568	3.5893	0.719183	4.9908	6.01313e-07	5.3564e-05	1.66902	0.745837	5.62053	1.71313	39.5018	78.7132	22.3353	25.8208	35.1207	225.304
9254	ENSG00000283288	SMIM33	protein_coding	37.9875	-3.42925	0.688043	-4.98406	6.22644e-07	5.5126e-05	84.2853	49.9711	31.6155	43.6849	79.0036	1.47128	0	11.7367	7.80461	19.8069
31864	ENSG00000100234	TIMP3	protein_coding	633.682	2.55847	0.513518	4.98225	6.28507e-07	5.54e-05	60.9191	231.955	276.811	265.536	109.727	1572.06	1493.36	580.578	2918.27	326.814
21347	ENSG00000102802	MEDAG	protein_coding	24.3847	4.38836	0.882245	4.97408	6.55583e-07	5.75332e-05	0	5.96669	0.702567	10.2788	0	19.8622	112.917	15.649	157.393	9.90346
10508	ENSG00000095970	TREM2	protein_coding	33.5875	4.66451	0.938017	4.97274	6.60146e-07	5.76806e-05	0.834508	2.98335	0.702567	2.5697	4.38909	64.7361	30.4008	18.7788	120.321	39.6138
11919	ENSG00000146674	IGFBP3	protein_coding	829.96	2.43451	0.490248	4.96588	6.83893e-07	5.92381e-05	218.641	409.464	177.749	388.025	141.914	3842.97	555.9	1278.52	2336.83	378.807
23173	ENSG00000166923	GREM1	protein_coding	396.98	3.96708	0.798794	4.96633	6.82311e-07	5.92381e-05	9.17959	21.6293	106.79	41.9718	57.0581	962.95	1878.02	240.212	1395.72	37.138
12403	ENSG00000106366	SERPINE1	protein_coding	127.215	3.84039	0.774023	4.96159	6.99182e-07	6.00426e-05	4.17254	25.3585	15.4565	36.8324	7.31515	197.887	773.048	238.647	470.878	17.3311
29377	ENSG00000099860	GADD45B	protein_coding	164.234	2.3112	0.465795	4.96184	6.98275e-07	6.00426e-05	69.2641	66.3795	47.7745	32.5495	87.7818	205.243	277.95	239.43	416.246	304.531
17862	ENSG00000196167	COLCA1	antisense	94.3889	-2.84349	0.573722	-4.95622	7.18768e-07	6.14608e-05	190.268	407.227	46.3694	375.176	40.9648	16.184	35.3641	50.8592	18.2108	4.95173
7143	ENSG00000159674	SPON2	protein_coding	522.654	2.10244	0.424365	4.95432	7.2583e-07	6.18006e-05	174.412	239.414	167.913	168.744	292.606	921.018	903.957	597.009	1934.24	403.566
18049	ENSG00000255248	MIR100HG	processed_transcript	47.9052	3.39512	0.685693	4.95136	7.36954e-07	6.24818e-05	0.834508	14.1709	16.159	6.85253	4.38909	135.357	108.574	28.1682	181.457	17.3311
32499	ENSG00000183486	MX2	protein_coding	106.795	2.61766	0.528763	4.95053	7.40098e-07	6.24836e-05	20.0282	88.7546	16.8616	31.693	20.4824	70.6212	348.058	207.349	248.447	96.5587
305	ENSG00000162493	PDPN	protein_coding	158.892	2.72365	0.550738	4.94546	7.59631e-07	6.38632e-05	20.8627	83.5337	32.3181	94.2224	57.0581	348.692	527.36	263.686	621.117	180.738
6090	ENSG00000187098	MITF	protein_coding	33.9066	3.01211	0.609234	4.9441	7.64967e-07	6.40428e-05	4.17254	34.3085	3.51283	9.42224	0	83.1271	105.472	25.0384	96.9072	7.42759
20697	ENSG00000256870	SLC5A8	protein_coding	15.1487	-6.20159	1.25626	-4.93655	7.95178e-07	6.6172e-05	31.7113	46.9877	1.40513	35.1192	20.4824	0	0	0.78245	0.650384	0
26613	ENSG00000108691	CCL2	protein_coding	118.883	2.95026	0.597691	4.9361	7.97014e-07	6.6172e-05	6.67606	46.9877	46.3694	110.497	0	105.932	213.426	239.43	482.585	74.2759
13418	ENSG00000067445	TRO	protein_coding	30.091	2.18404	0.443421	4.92544	8.41714e-07	6.95944e-05	9.17959	21.6293	9.13337	11.9919	7.31515	54.4372	80.6551	33.6453	102.761	12.3793
26065	ENSG00000072778	ACADVL	protein_coding	4637.55	-1.373	0.279591	-4.91073	9.07401e-07	7.47168e-05	7624.06	4399.69	4936.94	4474.71	8033.49	2956.53	1616.2	2397.43	2031.15	2282.75
23795	ENSG00000129009	ISLR	protein_coding	343.766	3.25849	0.664127	4.90642	9.27526e-07	7.6061e-05	27.5388	67.1253	26.6975	29.9798	166.785	712.097	428.713	183.093	1231.83	128.745
25384	ENSG00000039523	RIPOR1	protein_coding	171.837	1.24419	0.253797	4.9023	9.47203e-07	7.73575e-05	98.4719	132.013	89.226	110.497	83.3927	206.714	280.432	175.269	301.778	269.869
11856	ENSG00000106571	GLI3	protein_coding	18.195	4.05983	0.828283	4.9015	9.51085e-07	7.73588e-05	0	0.745837	1.40513	9.42224	0	24.276	67.0058	8.60695	55.2826	9.90346
16033	ENSG00000196739	COL27A1	protein_coding	188.34	1.92407	0.393201	4.89334	9.91394e-07	8.00332e-05	21.6972	137.234	51.2874	77.9476	118.505	175.817	380.32	294.984	408.441	170.835
32500	ENSG00000157601	MX1	protein_coding	336.302	2.47937	0.506694	4.89323	9.91966e-07	8.00332e-05	93.4649	290.876	85.0106	83.087	65.8363	192.001	1122.35	869.302	800.623	267.393
8191	ENSG00000237125	HAND2-AS1	antisense	14.0149	5.97507	1.2225	4.88758	1.02081e-06	8.20294e-05	0	0.745837	0	0	0	23.5404	29.1599	0.78245	50.73	4.95173
4053	ENSG00000155066	PROM2	protein_coding	225.025	-3.04196	0.622603	-4.88588	1.02969e-06	8.24126e-05	489.856	303.556	418.027	497.665	244.326	26.483	3.72254	159.62	39.023	74.2759
32638	ENSG00000210100	MT-TI	Mt_tRNA	46.3629	-3.47113	0.710589	-4.88486	1.03504e-06	8.25104e-05	72.6022	50.7169	15.4565	35.1192	111.19	7.35638	3.72254	3.91225	7.80461	0
8066	ENSG00000181541	MAB21L2	protein_coding	48.114	2.7352	0.560544	4.87955	1.06327e-06	8.44247e-05	3.33803	26.8501	10.5385	18.8445	5.85212	101.518	67.0058	44.5996	243.244	19.8069
31508	ENSG00000244486	SCARF2	protein_coding	57.5409	2.47033	0.506948	4.87294	1.09951e-06	8.69572e-05	11.6831	23.1209	18.2667	16.2748	20.4824	83.8627	145.179	52.4241	243.894	27.2345
5949	ENSG00000010318	PHF7	protein_coding	49.0431	-1.83288	0.376453	-4.86881	1.12273e-06	8.80965e-05	38.3874	80.5504	72.3644	92.5092	59.9842	8.82765	33.5029	14.8665	24.0642	17.3311
17915	ENSG00000166741	NNMT	protein_coding	360.978	2.80816	0.576744	4.869	1.12167e-06	8.80965e-05	70.0986	58.1753	39.3437	59.1031	204.824	524.51	490.755	366.187	883.222	344.145
9457	ENSG00000113721	PDGFRB	protein_coding	351.735	2.47667	0.510845	4.84819	1.24593e-06	9.71355e-05	35.8838	235.684	82.2003	186.732	65.8363	621.614	1190.59	356.015	1529.05	160.931
19195	ENSG00000150593	PDCD4	protein_coding	1983.2	-1.23883	0.255567	-4.8474	1.2509e-06	9.71355e-05	1584.73	1618.47	2305.12	1885.3	1846.34	819.5	509.988	1147.85	779.811	698.194
25128	ENSG00000171208	NETO2	protein_coding	115.59	-2.05648	0.424266	-4.84715	1.25248e-06	9.71355e-05	221.979	171.542	315.452	320.356	197.509	62.5292	49.0135	133.799	37.0719	37.138
2749	ENSG00000117594	HSD11B1	protein_coding	16.2074	4.30048	0.887983	4.84298	1.27907e-06	9.81638e-05	0	2.23751	2.1077	5.99597	0	19.8622	83.7572	24.2559	78.0461	4.95173
5138	ENSG00000169047	IRS1	protein_coding	125.095	2.23694	0.461781	4.84416	1.27147e-06	9.81638e-05	16.6902	60.4128	70.2567	71.9516	19.0194	153.013	312.694	240.212	354.459	76.7518
16293	ENSG00000170835	CEL	protein_coding	25.0975	2.39118	0.493764	4.84276	1.28046e-06	9.81638e-05	15.0211	5.96669	9.13337	10.2788	8.77818	114.759	30.4008	71.2029	18.2108	49.5173
701	ENSG00000225828	FAM229A	protein_coding	167.743	-1.92109	0.396813	-4.84128	1.29003e-06	9.85197e-05	169.405	77.567	91.3337	114.78	352.59	32.3681	17.3719	39.1225	55.933	56.9449
31150	ENSG00000022556	NLRP2	protein_coding	43.1165	3.85392	0.796796	4.83678	1.31962e-06	0.000100396	1.66902	14.9167	1.40513	0.856567	5.85212	10.2989	224.593	0.78245	73.4934	160.931
28197	ENSG00000078043	PIAS2	protein_coding	171.043	-1.41137	0.292243	-4.82943	1.36923e-06	0.000103776	241.173	252.093	267.678	250.974	220.917	86.8052	114.778	89.1993	83.8995	89.1311
19231	ENSG00000099204	ABLIM1	protein_coding	1317.55	-1.10655	0.22927	-4.8264	1.39022e-06	0.00010497	2180.57	1663.22	1731.12	1772.24	2453.5	1210.86	1050.38	755.064	636.726	955.684
6561	ENSG00000158186	MRAS	protein_coding	39.7551	2.19235	0.454766	4.82083	1.4296e-06	0.000107537	20.0282	27.596	14.0513	12.8485	8.77818	81.6558	119.121	45.3821	143.735	22.2828
2324	ENSG00000143196	DPT	protein_coding	195.773	3.50672	0.728032	4.81671	1.45945e-06	0.000109371	2.50352	2.23751	1.40513	6.85253	10.2412	46.3452	44.0501	7.04205	167.149	17.3311
25351	ENSG00000172828	CES3	protein_coding	947.023	-1.96385	0.408289	-4.80995	1.50966e-06	0.000112712	1253.43	1002.4	611.233	840.292	1468.88	116.966	176.2	400.614	373.32	354.049
30456	ENSG00000269190	FBXO17	protein_coding	16.1659	3.01002	0.626412	4.80518	1.54613e-06	0.000115005	1.66902	2.98335	6.3231	7.7091	0	21.3335	21.7148	22.691	68.9407	12.3793
6757	ENSG00000169255	B3GALNT1	protein_coding	14.9619	3.8661	0.804909	4.80315	1.56191e-06	0.000115749	2.50352	16.4084	0	0.856567	1.46303	50.0234	42.1888	14.8665	38.3727	9.90346
26163	ENSG00000133026	MYH10	protein_coding	80.5284	2.34028	0.487397	4.80159	1.57407e-06	0.00011622	21.6972	57.4294	42.8566	32.5495	5.85212	179.496	269.884	93.894	225.033	44.5656
16900	ENSG00000179241	LDLRAD3	protein_coding	32.5287	2.40306	0.500662	4.79977	1.58849e-06	0.000116853	7.51057	25.3585	16.159	11.9919	2.92606	54.4372	180.543	46.1645	44.2261	32.1862
9479	ENSG00000197043	ANXA6	protein_coding	748.791	1.25938	0.262535	4.797	1.61057e-06	0.000118044	297.919	670.507	444.022	574.756	335.034	1122.58	1406.5	943.635	1657.83	534.787
20890	ENSG00000135111	TBX3	protein_coding	306.474	-2.9618	0.618339	-4.78992	1.66847e-06	0.000121841	956.346	601.145	537.463	883.12	405.259	69.8856	58.3198	295.766	59.8353	37.138
7652	ENSG00000156234	CXCL13	protein_coding	26.4584	4.38355	0.916103	4.785	1.70987e-06	0.00012441	0.834508	4.47502	0	3.42627	0	97.8398	17.9923	24.2559	16.91	4.95173
4680	ENSG00000128656	CHN1	protein_coding	49.3282	2.4481	0.512295	4.77869	1.7644e-06	0.000126783	59.25	20.1376	14.7539	23.9839	1.46303	110.346	167.514	67.2907	189.262	19.8069
9518	ENSG00000135077	HAVCR2	protein_coding	50.136	2.54866	0.533301	4.77902	1.76149e-06	0.000126783	5.84155	44.7502	10.5385	19.701	2.92606	116.231	70.7283	81.3748	114.468	19.8069
14095	ENSG00000164816	DEFA5	protein_coding	1937.18	-12.4302	2.60139	-4.7783	1.76782e-06	0.000126783	1152.46	2875.2	14.7539	120.776	99.486	0	0	76.6801	0	0
22628	ENSG00000211448	DIO2	protein_coding	91.0931	2.95049	0.61725	4.78006	1.75247e-06	0.000126783	32.5458	46.9877	9.83593	14.5616	42.4278	288.37	240.724	104.848	400.637	101.51
1127	ENSG00000143001	TMEM61	protein_coding	31.5302	-3.73609	0.783285	-4.76977	1.84435e-06	0.000130864	80.9473	19.3918	42.154	85.6567	14.6303	1.47128	0	16.4314	6.50384	0
8453	ENSG00000151388	ADAMTS12	protein_coding	108.063	4.05625	0.850382	4.76991	1.84307e-06	0.000130864	1.66902	37.2918	8.4308	9.42224	7.31515	202.3	591.884	57.1188	654.286	29.7104
24391	ENSG00000183971	NPW	protein_coding	148.293	-4.74864	0.995474	-4.77023	1.84018e-06	0.000130864	339.645	20.1376	45.6668	41.9718	1378.17	0	2.48169	14.8665	1.95115	47.0414
17435	ENSG00000069482	GAL	protein_coding	65.8109	3.45223	0.725887	4.75588	1.97584e-06	0.000139698	27.5388	2.98335	6.3231	7.7091	27.7976	18.3909	63.9036	242.559	77.3957	438.228
2239	ENSG00000203747	FCGR3A	protein_coding	172.735	2.74494	0.577395	4.75401	1.99423e-06	0.000140009	17.5247	143.201	19.6719	102.788	19.0194	573.797	278.57	165.097	634.775	175.786
7857	ENSG00000138798	EGF	protein_coding	18.5764	-4.26903	0.897922	-4.75434	1.99093e-06	0.000140009	17.5247	67.8712	67.4464	42.8283	19.0194	0	3.72254	5.47715	4.55269	0
13995	ENSG00000198910	L1CAM	protein_coding	32.651	4.47023	0.941549	4.74775	2.05697e-06	0.000143909	0	1.49167	1.40513	7.7091	0	5.8851	109.815	3.91225	122.272	29.7104
16862	ENSG00000184937	WT1	protein_coding	8.73997	5.96953	1.25999	4.73775	2.16104e-06	0.000150663	0.834508	0.745837	0	0	0	13.2415	21.0944	31.298	53.9819	9.90346
1688	ENSG00000134240	HMGCS2	protein_coding	2991.84	-3.22429	0.681031	-4.73442	2.19679e-06	0.000152096	7870.24	3219.03	8849.53	2478.05	3856.54	3098.51	156.967	636.132	389.58	94.0829
23422	ENSG00000179362	HMGN2P46	transcribed_processed_pseudogene	51.5857	-1.70035	0.359144	-4.73444	2.19657e-06	0.000152096	96.8029	88.0088	57.6105	65.9556	70.2254	35.3106	19.2331	21.1261	17.5604	24.7586
7082	ENSG00000161267	BDH1	protein_coding	729.931	-1.33229	0.28188	-4.72645	2.28483e-06	0.000157645	1275.13	827.879	923.875	782.902	1302.1	553.935	299.665	316.892	416.896	448.131
20137	ENSG00000123358	NR4A1	protein_coding	944.595	2.46086	0.521059	4.7228	2.32614e-06	0.000159944	208.627	149.167	208.662	451.411	381.851	1424.19	1713.61	1780.07	3050.95	623.918
16299	ENSG00000175164	ABO	protein_coding	886.494	-1.41589	0.299899	-4.72124	2.34414e-06	0.000160486	1568.87	1311.18	1265.32	1606.06	637.881	1091.69	493.857	495.291	351.207	237.683
26058	ENSG00000174326	SLC16A11	protein_coding	13.7775	-3.38293	0.716613	-4.72072	2.35006e-06	0.000160486	26.7042	25.3585	35.1283	21.4142	21.9454	1.47128	0.620424	5.47715	5.20307	2.47586
12396	ENSG00000087085	ACHE	protein_coding	118.982	2.03662	0.4317	4.71768	2.38546e-06	0.000162349	33.3803	7.45837	26.6975	26.5536	42.4278	121.38	139.595	95.4589	72.843	108.938
741	ENSG00000187513	GJA4	protein_coding	37.8053	2.37632	0.504691	4.70846	2.49592e-06	0.000169291	6.67606	23.8668	3.51283	16.2748	23.4085	75.035	87.4797	45.3821	118.37	29.7104
23097	ENSG00000206190	ATP10A	protein_coding	30.5808	2.61882	0.556447	4.70632	2.52232e-06	0.000170504	7.51057	14.9167	7.72823	11.1354	5.85212	66.2074	76.3121	23.4735	145.036	17.3311
15361	ENSG00000147889	CDKN2A	protein_coding	20.0059	2.85826	0.607814	4.70253	2.5696e-06	0.000173115	5.00705	9.69588	8.4308	0.856567	1.46303	53.7016	47.7726	19.5612	40.3238	14.8552
1239	ENSG00000050628	PTGER3	protein_coding	14.7319	4.43956	0.944512	4.70038	2.59679e-06	0.000173776	0.834508	4.47502	0.702567	0.856567	0	44.1383	53.9769	6.2596	59.8353	0
25765	ENSG00000225614	ZNF469	protein_coding	23.5048	4.22583	0.899029	4.70043	2.59609e-06	0.000173776	1.66902	4.47502	2.81027	1.71313	1.46303	31.6324	166.894	21.9086	77.3957	4.95173
18325	ENSG00000026025	VIM	protein_coding	2617.71	1.93757	0.412597	4.69603	2.65269e-06	0.000176925	443.124	2186.79	734.885	1286.56	800.277	5205.37	4749.34	3095.37	7697.3	1094.33
6354	ENSG00000114013	CD86	protein_coding	51.4493	2.23123	0.475531	4.69209	2.7043e-06	0.000179769	10.8486	40.2752	14.7539	10.2788	11.7042	84.5983	94.9248	90.7642	98.208	24.7586
3231	ENSG00000115756	HPCAL1	protein_coding	479.95	-0.990204	0.211698	-4.67743	2.90497e-06	0.000192262	894.592	539.24	506.551	766.627	653.974	401.658	350.539	299.678	312.184	307.007
7473	ENSG00000163071	SPATA18	protein_coding	66.0038	-1.91649	0.409771	-4.67697	2.91146e-06	0.000192262	117.666	146.93	124.354	137.907	95.0969	75.035	39.0867	41.4698	24.7146	12.3793
5384	ENSG00000134107	BHLHE40	protein_coding	583.116	2.37945	0.509203	4.67289	2.96997e-06	0.000194844	142.701	374.41	231.144	238.126	153.618	1210.86	1780	1176.8	1590.84	460.511
13977	ENSG00000182492	BGN	protein_coding	674.273	3.04626	0.652021	4.67202	2.98245e-06	0.000194844	72.6022	231.209	66.7438	89.083	474.021	1488.2	1777.51	335.671	3226.56	403.566
16556	ENSG00000130600	H19	processed_transcript	53.4166	4.5389	0.971607	4.67154	2.98951e-06	0.000194844	0.834508	11.9334	2.81027	0	4.38909	134.622	172.478	32.0804	408.441	2.47586
21313	ENSG00000183463	URAD	protein_coding	219.282	-6.65043	1.4235	-4.6719	2.98423e-06	0.000194844	636.729	170.051	0	248.404	601.305	0	6.82466	0.78245	2.60154	7.42759
9768	ENSG00000037280	FLT4	protein_coding	37.7927	2.66545	0.571316	4.66546	3.07929e-06	0.000200044	6.67606	23.8668	3.51283	10.2788	4.38909	60.3223	67.0058	38.34	122.272	14.8552
23742	ENSG00000166173	LARP6	protein_coding	19.6484	3.35078	0.718399	4.66424	3.09763e-06	0.000200584	5.84155	0.745837	4.2154	1.71313	8.77818	30.8968	52.736	19.5612	67.6399	44.5656
6411	ENSG00000250218	ALDH1L1-AS1	antisense	74.0462	-4.76869	1.02462	-4.65411	3.2538e-06	0.000210017	307.099	44.0044	13.3488	24.8404	453.539	25.7473	0	4.6947	1.30077	0
21977	ENSG00000157227	MMP14	protein_coding	1373.48	2.02118	0.434417	4.65264	3.27715e-06	0.000210844	403.067	984.505	661.115	809.456	292.606	2615.19	4837.44	1524.21	5496.4	569.449
3827	ENSG00000163017	ACTG2	protein_coding	566.445	2.45846	0.528617	4.65075	3.30735e-06	0.000212105	45.8979	182.73	243.088	130.198	117.042	845.248	583.819	604.834	2874.05	158.455
1910	ENSG00000143416	SELENBP1	protein_coding	9861.15	-2.65201	0.570442	-4.64904	3.33485e-06	0.000213185	16553.3	14717.6	14300	10746.5	17919.2	2064.2	933.117	2284.75	1130.37	9611.31
29039	ENSG00000124216	SNAI1	protein_coding	16.0431	4.77317	1.02691	4.64809	3.35028e-06	0.00021349	0	7.45837	0.702567	2.5697	0	19.1266	78.7938	27.3857	66.9896	22.2828
29875	ENSG00000074181	NOTCH3	protein_coding	188.812	2.43041	0.522969	4.64734	3.36248e-06	0.000213587	33.3803	160.355	38.6412	97.6486	19.0194	345.014	787.938	173.704	710.219	64.3725
2251	ENSG00000162745	OLFML2B	protein_coding	102.939	2.48909	0.537316	4.63246	3.61352e-06	0.000227854	19.1937	56.6836	18.9693	35.1192	42.4278	256.738	277.329	79.0274	530.713	51.9932
12365	ENSG00000085514	PILRA	protein_coding	28.3161	2.06586	0.445993	4.63205	3.62069e-06	0.000227854	6.67606	17.1542	7.02567	16.2748	5.85212	50.0234	53.3564	21.9086	80.6476	19.8069
19752	ENSG00000111341	MGP	protein_coding	469.113	2.40941	0.520164	4.63201	3.62125e-06	0.000227854	99.3064	134.996	54.8002	129.342	117.042	783.454	346.817	438.172	2284.15	200.545
4787	ENSG00000168542	COL3A1	protein_coding	7352.92	2.65824	0.573985	4.6312	3.63549e-06	0.000228033	541.596	5334.23	1812.62	2941.45	478.411	15810.3	37441.9	5926.28	29240	1322.11
30270	ENSG00000105707	HPN	protein_coding	28.0953	-4.57427	0.987849	-4.63054	3.64721e-06	0.000228053	166.902	26.1043	82.2003	59.9597	30.7236	0	0	11.7367	7.15423	2.47586
19492	ENSG00000255474	AC005833.1	lincRNA	100.975	-2.5032	0.542279	-4.61607	3.91074e-06	0.000242814	237.835	175.272	285.945	209.859	65.8363	40.4601	30.4008	43.8172	30.5681	19.8069
20978	ENSG00000122971	ACADS	protein_coding	1977.2	-2.18835	0.47412	-4.6156	3.91969e-06	0.000242814	1427.84	574.294	571.889	487.387	4329.1	194.944	120.983	331.759	178.205	547.166
25931	ENSG00000277200	AC005696.4	lincRNA	20.9881	-3.85608	0.835445	-4.6156	3.91957e-06	0.000242814	38.3874	6.71253	21.7796	23.9839	43.8909	1.47128	0.620424	10.9543	0	0
22796	ENSG00000168350	DEGS2	protein_coding	545.899	-2.27066	0.492267	-4.61266	3.97547e-06	0.00024551	726.022	210.326	328.801	315.217	1386.95	95.6329	35.3641	244.907	118.37	99.0346
19749	ENSG00000182993	C12orf60	protein_coding	148.858	2.77798	0.60246	4.61106	4.00613e-06	0.000246642	43.3944	61.9045	28.8052	48.8243	2.92606	325.887	153.865	187.788	868.913	7.42759
2521	ENSG00000073756	PTGS2	protein_coding	98.3727	3.43232	0.744861	4.608	4.06552e-06	0.000248398	11.6831	40.2752	11.2411	37.6889	8.77818	14.7128	446.085	265.251	449.415	54.469
7361	ENSG00000169851	PCDH7	protein_coding	51.8627	2.5739	0.558611	4.60768	4.07189e-06	0.000248398	5.00705	23.8668	26.6975	9.42224	1.46303	79.4489	134.012	41.4698	120.971	12.3793
22432	ENSG00000198133	TMEM229B	protein_coding	106.406	-1.6917	0.367147	-4.6077	4.07148e-06	0.000248398	133.521	70.1087	72.3644	110.497	298.458	34.575	16.131	42.2523	43.5757	64.3725
4451	ENSG00000121966	CXCR4	protein_coding	303.683	1.98623	0.431465	4.60345	4.15541e-06	0.000252722	93.4649	145.438	60.4207	202.15	61.4472	584.096	354.882	509.375	613.963	185.69
29271	ENSG00000070404	FSTL3	protein_coding	165.368	2.40756	0.523325	4.6005	4.21477e-06	0.000255555	75.9402	13.4251	42.8566	34.2627	144.84	272.186	261.819	121.28	451.367	225.304
12637	ENSG00000128591	FLNC	protein_coding	115.079	2.05832	0.447509	4.5995	4.23497e-06	0.000256005	30.0423	35.8002	37.236	30.8364	45.3539	207.45	148.281	88.4168	347.305	49.5173
11316	ENSG00000164694	FNDC1	protein_coding	59.5658	4.56691	0.993408	4.59721	4.28187e-06	0.000256515	0.834508	12.6792	7.02567	0.856567	1.46303	197.151	209.083	23.4735	344.704	4.95173
21698	ENSG00000088386	SLC15A1	protein_coding	243.135	3.55203	0.772619	4.59739	4.27824e-06	0.000256515	2.50352	1.49167	17.5642	0.856567	1.46303	38.2532	29.1599	87.6344	17.5604	19.8069
30443	ENSG00000171747	LGALS4	protein_coding	16482.8	-1.5102	0.328475	-4.59762	4.27349e-06	0.000256515	19978.1	10764.7	17510.8	9363.13	21677.7	4394.7	4084.87	9806.45	3907.51	6972.03
26141	ENSG00000179094	PER1	protein_coding	190	1.35338	0.294459	4.59617	4.30331e-06	0.00025703	50.905	86.5171	58.313	82.2304	55.5951	262.623	204.74	159.62	186.01	79.2277
14191	ENSG00000038945	MSR1	protein_coding	83.0199	2.96116	0.644544	4.5942	4.34419e-06	0.000258699	3.33803	62.6503	32.3181	12.8485	5.85212	144.185	210.324	88.4168	316.737	22.2828
18826	ENSG00000156113	KCNMA1	protein_coding	207.508	-2.20474	0.480879	-4.58481	4.54394e-06	0.000269791	436.448	111.876	241.683	216.711	411.111	98.5754	31.0212	28.1682	143.085	24.7586
15191	ENSG00000167701	GPT	protein_coding	1048.69	-3.28125	0.716116	-4.58201	4.60524e-06	0.000272077	871.226	669.016	196.719	167.031	2204.79	19.1266	14.8902	278.552	67.6399	311.959
16728	ENSG00000110328	GALNT18	protein_coding	41.5699	2.21181	0.482736	4.58181	4.60963e-06	0.000272077	20.0282	33.5627	19.6719	16.2748	8.77818	65.4718	60.1811	149.448	74.1438	69.3242
17833	ENSG00000152402	GUCY1A2	protein_coding	10.465	3.52849	0.770866	4.57731	4.70994e-06	0.00027718	0	4.47502	1.40513	6.85253	0	16.9197	47.7726	12.5192	31.8688	12.3793
8868	ENSG00000038427	VCAN	protein_coding	493.438	3.05524	0.667707	4.57572	4.74576e-06	0.000277932	29.2078	454.215	80.0926	169.6	20.4824	859.225	2513.96	479.642	1854.25	138.648
16319	ENSG00000160293	VAV2	protein_coding	281.784	1.465	0.320183	4.57551	4.7505e-06	0.000277932	103.479	150.659	161.59	77.091	152.155	245.703	460.975	345.843	371.369	339.193
1618	ENSG00000188761	BCL2L15	protein_coding	462.081	-1.54745	0.338252	-4.57484	4.76575e-06	0.000278011	550.775	956.163	604.91	570.474	626.177	390.624	141.457	258.208	125.524	302.055
16144	ENSG00000136859	ANGPTL2	protein_coding	177.827	2.32807	0.50981	4.56654	4.95845e-06	0.000288412	27.5388	99.9421	54.0976	71.095	55.5951	314.117	644.62	193.265	807.777	61.8966
8463	ENSG00000039560	RAI14	protein_coding	163.857	1.7524	0.384117	4.56214	5.06355e-06	0.000293671	67.5951	105.163	90.6311	73.6647	83.3927	231.726	661.992	228.475	399.336	91.607
24356	ENSG00000260989	AL133297.2	antisense	14.7937	-6.57833	1.44539	-4.55124	5.33317e-06	0.000308414	70.9332	10.4417	7.02567	5.1394	49.743	0	0.620424	0	0	0
27270	ENSG00000108387	2020-09-04	protein_coding	50.494	1.9201	0.422204	4.5478	5.42102e-06	0.000312591	13.3521	35.0543	10.5385	25.697	20.4824	73.5638	73.8304	58.6837	145.036	51.9932
31881	ENSG00000100302	RASD2	protein_coding	89.7414	-1.77144	0.389841	-4.54401	5.51946e-06	0.000317353	175.247	93.2296	93.4414	147.329	175.564	22.8048	44.6705	47.7294	48.7788	34.6621
10645	ENSG00000170915	PAQR8	protein_coding	785.399	-1.66058	0.36572	-4.54057	5.61027e-06	0.00032165	1344.39	1330.57	1028.56	820.591	936.339	267.772	237.622	585.273	217.879	428.325
16442	ENSG00000188833	ENTPD8	protein_coding	869.021	-2.17341	0.479066	-4.53677	5.71217e-06	0.000326557	731.863	229.718	342.15	496.809	1050.45	62.5292	26.6782	230.823	171.701	309.483
8190	ENSG00000164107	HAND2	protein_coding	17.2188	4.36391	0.96233	4.53473	5.76761e-06	0.000328787	0.834508	0.745837	0	3.42627	0	30.8968	16.7514	1.5649	79.9972	2.47586
32161	ENSG00000075234	TTC38	protein_coding	754.26	-1.36801	0.301777	-4.53318	5.81029e-06	0.000330279	1189.17	660.811	663.925	560.195	1252.35	276.6	307.73	465.558	230.236	363.952
28090	ENSG00000170558	CDH2	protein_coding	12.9583	5.08478	1.12268	4.52915	5.92208e-06	0.00033568	2.50352	0	0	0.856567	0	30.8968	54.5973	1.5649	44.2261	2.47586
14221	ENSG00000036565	SLC18A1	protein_coding	29.5399	-3.70457	0.818053	-4.52852	5.93977e-06	0.000335731	83.4508	7.45837	9.13337	137.051	54.1321	1.47128	2.48169	10.9543	5.85346	0
28919	ENSG00000149596	JPH2	protein_coding	34.1233	2.79291	0.616908	4.52727	5.97499e-06	0.000336771	0.834508	4.47502	11.9436	6.85253	17.5564	37.5175	65.1445	23.4735	102.11	22.2828
7034	ENSG00000145113	MUC4	protein_coding	1812.24	-1.90849	0.421719	-4.52551	6.0251e-06	0.000338641	2076.26	5972.66	1752.2	3547.04	1923.88	879.087	447.325	888.863	611.361	772.47
14413	ENSG00000077782	FGFR1	protein_coding	139.414	1.7147	0.379395	4.51958	6.19638e-06	0.000347293	40.8909	116.351	61.8259	86.5133	26.3345	222.898	228.936	166.662	407.791	64.3725
27609	ENSG00000070526	ST6GALNAC1	protein_coding	1680.72	-2.13283	0.472563	-4.51333	6.38171e-06	0.00035668	2228.14	1768.38	4933.42	4457.57	850.02	425.934	776.15	1164.29	532.665	274.821
26199	ENSG00000264016	AC015908.3	lincRNA	19.8855	-3.05169	0.676786	-4.50909	6.51065e-06	0.000362873	21.6972	9.69588	3.51283	18.8445	46.8169	2.94255	0.620424	0.78245	4.55269	0
9097	ENSG00000064651	SLC12A2	protein_coding	2936.35	-1.65702	0.36777	-4.50558	6.61923e-06	0.000367879	6096.08	5216.38	6505.77	7485.54	3847.77	2812.34	3188.36	2115.74	954.764	1096.81
22843	ENSG00000156381	ANKRD9	protein_coding	747.806	-1.42442	0.316186	-4.505	6.63723e-06	0.000367879	862.881	693.628	703.972	477.108	1702.97	198.622	318.277	377.141	271.861	445.656
29067	ENSG00000101115	SALL4	protein_coding	56.6891	3.18729	0.707943	4.50219	6.72574e-06	0.000371755	26.7042	9.69588	8.4308	11.1354	24.8715	211.128	330.686	79.0274	93.6553	37.138
1932	ENSG00000143365	RORC	protein_coding	218.978	-1.51523	0.33708	-4.49516	6.95181e-06	0.000383192	255.359	195.409	375.873	256.97	383.314	98.5754	84.3776	112.673	161.295	54.469
18098	ENSG00000149557	FEZ1	protein_coding	37.329	1.85791	0.413615	4.49188	7.05959e-06	0.000388064	19.1937	20.1376	18.9693	11.1354	10.2412	43.4026	67.6262	53.989	109.915	27.2345
19298	ENSG00000166033	HTRA1	protein_coding	403.225	2.17937	0.485403	4.48981	7.12861e-06	0.000390785	95.1339	222.259	89.9285	105.358	295.532	751.822	892.169	326.282	1321.58	299.58
14658	ENSG00000121005	CRISPLD1	protein_coding	14.4854	5.35715	1.19538	4.48153	7.41104e-06	0.000405157	0.834508	2.23751	0	0	0	87.5409	27.9191	2.34735	84.5499	0
8118	ENSG00000145431	PDGFC	protein_coding	87.6656	2.19771	0.490808	4.47773	7.54403e-06	0.000410431	20.8627	60.4128	21.7796	49.6809	20.4824	205.243	189.85	156.49	338.85	27.2345
23264	ENSG00000128928	IVD	protein_coding	563.534	-0.9969	0.222641	-4.4776	7.54854e-06	0.000410431	944.663	632.47	760.88	683.54	920.245	364.876	370.393	466.34	310.233	472.89
12193	ENSG00000075213	SEMA3A	protein_coding	43.6112	2.28979	0.511886	4.47325	7.7039e-06	0.000417743	30.8768	41.7669	14.0513	17.9879	4.38909	75.7707	131.53	48.5119	137.881	56.9449
31596	ENSG00000185686	PRAME	protein_coding	12.4687	6.44267	1.44068	4.47197	7.75009e-06	0.000419112	0	0.745837	0	0.856567	0	25.0117	0	84.5046	18.2108	56.9449
29834	ENSG00000132016	C19orf57	protein_coding	75.9513	-1.63813	0.366483	-4.46988	7.82644e-06	0.0004221	127.68	101.434	106.088	118.206	156.544	41.9313	46.5318	36.7751	54.6323	12.3793
7452	ENSG00000145244	CORIN	protein_coding	12.6336	4.79094	1.07232	4.46785	7.90112e-06	0.000424982	0	1.49167	0.702567	1.71313	0	97.1042	31.6416	0.78245	50.73	2.47586
131	ENSG00000197921	HES5	protein_coding	45.8914	-4.17366	0.934865	-4.46445	8.02753e-06	0.000430624	137.694	19.3918	15.4565	35.9758	166.785	1.47128	2.48169	2.34735	5.20307	4.95173
14065	ENSG00000147364	FBXO25	protein_coding	343.833	-1.32623	0.29716	-4.46302	8.0812e-06	0.000432344	423.095	273.722	442.617	333.205	574.97	153.748	116.019	221.433	154.141	170.835
8899	ENSG00000175745	NR2F1	protein_coding	49.645	2.5825	0.578917	4.46092	8.161e-06	0.000435449	20.0282	20.1376	11.9436	34.2627	1.46303	51.4946	69.4875	98.5887	213.326	22.2828
2725	ENSG00000162896	PIGR	protein_coding	63424.4	-3.7204	0.83474	-4.45696	8.31308e-06	0.000442229	88919.3	67391.6	34928.1	52249.7	127715	692.971	104.231	31517.9	7675.83	21646.5
30803	ENSG00000105499	PLA2G4C	protein_coding	44.5199	2.24835	0.504514	4.45646	8.33227e-06	0.000442229	14.1866	15.6626	15.4565	14.5616	1.46303	34.575	83.1368	79.0274	69.5911	29.7104
16241	ENSG00000148344	PTGES	protein_coding	65.5409	2.05513	0.461357	4.45454	8.4073e-06	0.000445031	21.6972	11.1876	12.6462	27.4101	46.8169	55.9085	82.5163	64.1609	215.928	54.469
13747	ENSG00000101938	CHRDL1	protein_coding	38.6691	4.60426	1.0341	4.45241	8.49119e-06	0.000447106	0	0.745837	2.81027	2.5697	0	58.1154	28.5395	18.7788	176.904	0
26753	ENSG00000161381	PLXDC1	protein_coding	116.502	2.16828	0.486976	4.45254	8.48604e-06	0.000447106	11.6831	90.2463	33.0206	53.1071	35.1127	244.967	235.141	104.066	400.637	54.469
7617	ENSG00000109321	AREG	protein_coding	249.48	2.52671	0.56871	4.44287	8.87654e-06	0.00046495	83.4508	76.0754	120.841	41.1152	131.673	178.76	324.482	970.238	309.583	886.36
22006	ENSG00000100842	EFS	protein_coding	26.8977	2.74542	0.617879	4.4433	8.85901e-06	0.00046495	3.33803	20.1376	4.91797	3.42627	1.46303	41.9313	39.0867	41.4698	71.5423	4.95173
11729	ENSG00000136193	SCRN1	protein_coding	215.825	2.37228	0.534129	4.44141	8.93731e-06	0.00046691	34.2148	120.826	101.872	83.9436	30.7236	166.99	1316.54	266.033	463.724	143.6
8115	ENSG00000061918	GUCY1B1	protein_coding	56.2985	2.79953	0.630989	4.43674	9.1332e-06	0.000475902	7.51057	31.3251	22.4821	20.5576	1.46303	122.116	220.25	48.5119	226.984	14.8552
5219	ENSG00000115468	EFHD1	protein_coding	10.8713	3.75573	0.84725	4.43285	9.29976e-06	0.000483322	0.834508	2.23751	1.40513	0.856567	1.46303	25.0117	18.6127	11.7367	39.6734	2.47586
24351	ENSG00000131634	TMEM204	protein_coding	90.2901	2.05173	0.463818	4.42356	9.7086e-06	0.000503263	32.5458	58.1753	26.6975	47.9677	21.9454	221.427	135.873	129.104	278.364	64.3725
21655	ENSG00000184564	SLITRK6	protein_coding	115.409	-3.83942	0.869833	-4.41398	1.01489e-05	0.000524728	166.902	189.443	219.903	595.314	80.4666	37.5175	6.82466	112.673	5.20307	2.47586
7289	ENSG00000109705	NKX3-2	protein_coding	10.1043	5.31085	1.20451	4.40915	1.03776e-05	0.000533879	0	0.745837	0.702567	0.856567	0	33.8393	19.8536	7.8245	57.2338	0
25971	ENSG00000167741	GGT6	protein_coding	825.51	-1.8744	0.42512	-4.40912	1.03793e-05	0.000533879	945.497	883.817	788.28	567.904	1224.56	240.554	58.9402	428	228.285	386.235
23321	ENSG00000159337	PLA2G4D	protein_coding	11.1414	-3.45406	0.783516	-4.4084	1.04135e-05	0.000534265	10.8486	58.9211	18.2667	59.1031	2.92606	2.20691	6.82466	1.5649	1.95115	0
9442	ENSG00000249669	CARMN	lincRNA	225.184	1.69498	0.38454	4.40782	1.04416e-05	0.000534336	64.2571	110.384	92.0362	113.923	77.5405	325.887	294.081	164.314	684.854	141.124
12962	ENSG00000181652	ATG9B	protein_coding	52.3561	2.76527	0.627567	4.40633	1.05136e-05	0.000536651	11.6831	16.4084	4.2154	20.5576	39.5018	208.185	177.441	59.4662	95.6065	37.138
19134	ENSG00000156398	SFXN2	protein_coding	102.78	-1.32922	0.301934	-4.40234	1.07088e-05	0.000545224	206.123	90.9921	125.759	120.776	231.159	62.5292	36.605	45.3821	79.3469	76.7518
2181	ENSG00000162734	PEA15	protein_coding	539.405	1.114	0.25352	4.39411	1.11227e-05	0.000564858	371.356	449.74	440.509	403.443	351.127	1164.51	925.672	721.419	1211.02	514.98
1205	ENSG00000118473	SGIP1	protein_coding	48.0773	2.84278	0.647077	4.39326	1.11663e-05	0.000565639	5.84155	42.5127	4.91797	27.4101	4.38909	112.553	174.959	57.9013	178.856	29.7104
12779	ENSG00000258227	CLEC5A	protein_coding	17.8925	4.87725	1.11143	4.38826	1.14261e-05	0.000577333	0	3.72918	2.1077	0	2.92606	50.0234	106.713	11.7367	72.1926	7.42759
22272	ENSG00000073712	FERMT2	protein_coding	146.66	2.17174	0.495515	4.38279	1.17169e-05	0.000590537	14.1866	107.401	69.5541	104.501	14.6303	234.668	446.085	223.781	442.261	54.469
8255	ENSG00000154553	PDLIM3	protein_coding	140.09	2.62097	0.598351	4.38032	1.18503e-05	0.000594381	2.50352	69.3628	80.0926	52.2506	11.7042	180.967	433.676	183.876	539.819	29.7104
23435	ENSG00000166147	FBN1	protein_coding	406.662	2.47204	0.564356	4.38028	1.18526e-05	0.000594381	40.0564	446.756	103.277	156.752	19.0194	958.536	1731.6	343.496	1173.94	113.89
22915	ENSG00000185567	AHNAK2	protein_coding	95.4184	2.69801	0.616185	4.37857	1.1946e-05	0.000597568	15.8556	23.8668	16.159	8.56567	112.653	238.347	163.792	95.4589	258.853	51.9932
3916	ENSG00000152292	SH2D6	protein_coding	57.3243	-4.15252	0.948755	-4.37681	1.20428e-05	0.000600907	38.3874	120.826	16.8616	26.5536	162.396	5.14946	1.24085	9.3894	0.650384	2.47586
12960	ENSG00000055118	KCNH2	protein_coding	44.1073	2.36624	0.541136	4.37273	1.22702e-05	0.000610731	9.17959	14.9167	23.1847	10.2788	7.31515	99.3111	104.231	25.8208	101.46	17.3311
2135	ENSG00000183853	KIRREL1	protein_coding	119.852	2.31728	0.530116	4.37127	1.23526e-05	0.00061179	16.6902	102.18	66.0413	65.9556	10.2412	208.185	378.458	184.658	349.907	96.5587
6533	ENSG00000154928	EPHB1	protein_coding	14.4572	4.40451	1.00751	4.37168	1.23296e-05	0.00061179	5.00705	0.745837	2.1077	0	2.92606	35.3106	97.4065	25.0384	40.3238	2.47586
21427	ENSG00000102760	RGCC	protein_coding	82.9474	2.03041	0.465033	4.36616	1.26451e-05	0.000624729	39.2219	62.6503	25.2924	48.8243	14.6303	130.944	124.085	122.062	384.377	49.5173
10749	ENSG00000111799	COL12A1	protein_coding	1126.1	2.71421	0.622004	4.36366	1.27906e-05	0.000628811	71.7677	947.959	187.585	315.217	193.12	2540.89	6663.97	850.523	3759.22	465.463
23717	ENSG00000137809	ITGA11	protein_coding	104.13	2.64293	0.605623	4.36399	1.27713e-05	0.000628811	18.3592	58.1753	25.2924	27.4101	27.7976	280.278	439.26	73.5503	461.773	12.3793
32174	ENSG00000219438	FAM19A5	protein_coding	27.3899	2.68515	0.615435	4.36302	1.28282e-05	0.000629116	2.50352	8.20421	7.72823	8.56567	11.7042	75.035	34.7437	39.1225	104.712	17.3311
13215	ENSG00000147027	TMEM47	protein_coding	66.279	1.78257	0.409256	4.35563	1.32686e-05	0.000649123	25.8697	38.7835	23.8873	38.5455	14.6303	108.139	196.054	69.638	152.84	19.8069
20918	ENSG00000171435	KSR2	protein_coding	28.8846	-2.25975	0.519035	-4.35376	1.33825e-05	0.000653097	57.581	25.3585	63.231	106.214	30.7236	5.8851	9.30636	15.649	16.91	12.3793
27454	ENSG00000108950	FAM20A	protein_coding	21.8667	2.74167	0.630142	4.35088	1.35594e-05	0.000660122	2.50352	18.6459	1.40513	6.85253	5.85212	46.3452	48.393	14.8665	76.7453	19.8069
32639	ENSG00000210107	MT-TQ	Mt_tRNA	128.775	-3.02181	0.695846	-4.34265	1.40774e-05	0.000683677	161.895	120.826	76.5798	136.194	324.792	22.0691	40.948	10.9543	20.1619	0
25895	ENSG00000132386	SERPINF1	protein_coding	356.879	1.86166	0.428806	4.34149	1.41522e-05	0.000685646	55.912	199.138	233.955	256.113	52.6691	708.419	557.14	589.185	1126.47	108.938
19190	ENSG00000138166	DUSP5	protein_coding	128.725	2.03633	0.469597	4.33633	1.4488e-05	0.000696851	43.3944	63.3961	23.8873	32.5495	48.28	96.3685	169.996	187.006	230.886	131.221
20972	ENSG00000110917	MLEC	protein_coding	3436.68	-1.14203	0.263347	-4.33659	1.44711e-05	0.000696851	5172.28	4845.7	4877.92	5452.05	5701.42	1803.05	2236.63	3809.75	1547.91	2886.86
21385	ENSG00000120693	SMAD9	protein_coding	104.232	-2.05083	0.472912	-4.3366	1.44705e-05	0.000696851	146.039	219.276	232.55	487.387	51.206	67.6787	71.3487	33.6453	46.1773	32.1862
4941	ENSG00000163599	CTLA4	protein_coding	31.0023	2.07313	0.478687	4.33087	1.48523e-05	0.000712215	27.5388	7.45837	4.91797	16.2748	13.1673	77.9776	32.8825	61.8135	33.82	47.0414
19092	ENSG00000095539	SEMA4G	protein_coding	668.267	-1.46607	0.338548	-4.33048	1.48786e-05	0.000712215	674.282	704.07	781.957	794.894	949.506	282.485	224.593	472.6	309.583	143.6
27344	ENSG00000011028	MRC2	protein_coding	367.933	2.20158	0.508741	4.32751	1.50806e-05	0.000720163	86.7888	190.934	90.6311	89.083	141.914	548.786	732.72	379.488	1194.11	158.455
14839	ENSG00000164920	OSR2	protein_coding	21.7994	5.31139	1.22784	4.32579	1.51983e-05	0.000724053	0	0.745837	0	0	0	11.0346	5.58381	31.298	16.2596	0
8318	ENSG00000145506	NKD2	protein_coding	85.9673	2.44735	0.565929	4.32448	1.52895e-05	0.000724947	79.2782	11.9334	21.7796	6.85253	150.692	175.082	165.033	117.367	180.156	282.249
8483	ENSG00000079215	SLC1A3	protein_coding	23.9175	3.97894	0.920051	4.3247	1.52741e-05	0.000724947	0.834508	2.98335	1.40513	3.42627	1.46303	113.288	116.019	13.3016	42.275	0
17091	ENSG00000166927	MS4A7	protein_coding	127.32	2.07256	0.479418	4.32308	1.53865e-05	0.000727822	15.8556	96.9588	36.5335	48.8243	5.85212	145.656	152.624	165.097	162.596	61.8966
4594	ENSG00000172318	B3GALT1	protein_coding	83.3483	-3.50568	0.811275	-4.32119	1.55187e-05	0.000732342	107.651	87.2629	95.5491	47.1112	127.284	2.20691	1.86127	36.7751	8.45499	19.8069
26472	ENSG00000109113	RAB34	protein_coding	149.753	1.68388	0.390289	4.31444	1.60006e-05	0.000753309	34.2148	64.142	38.6412	70.2385	98.023	181.703	162.551	138.494	364.865	118.841
2070	ENSG00000132718	SYT11	protein_coding	60.6376	2.04884	0.475238	4.31118	1.62387e-05	0.000762725	27.5388	64.142	16.8616	25.697	8.77818	121.38	152.624	79.0274	201.619	22.2828
25694	ENSG00000135709	KIAA0513	protein_coding	185.085	-1.1342	0.263186	-4.3095	1.63622e-05	0.000766725	155.218	261.789	192.503	202.15	177.027	92.6903	89.341	75.1152	89.1026	101.51
27143	ENSG00000064300	NGFR	protein_coding	13.4626	3.81224	0.885556	4.30491	1.67056e-05	0.000780985	0.834508	0.745837	0	4.28283	0	4.41383	8.68593	9.3894	48.1284	9.90346
17140	ENSG00000149485	FADS1	protein_coding	73.207	3.02927	0.705664	4.2928	1.76438e-05	0.000822923	6.67606	48.4794	17.5642	23.9839	14.6303	57.3797	213.426	77.4625	262.105	279.773
14491	ENSG00000019549	SNAI2	protein_coding	59.6238	1.98539	0.462574	4.29205	1.77031e-05	0.000823772	15.0211	48.4794	16.8616	32.5495	5.85212	107.403	175.58	36.7751	134.63	24.7586
15679	ENSG00000165092	ALDH1A1	protein_coding	721.244	-2.67169	0.623016	-4.28832	1.80032e-05	0.000835791	1262.61	742.854	1431.83	1337.96	381.851	94.8973	80.0347	582.925	147.637	51.9932
5994	ENSG00000114251	WNT5A	protein_coding	193.972	2.21116	0.515769	4.28711	1.81012e-05	0.000838397	77.6092	229.718	48.4771	75.3779	51.206	242.025	776.15	414.698	537.868	143.6
10891	ENSG00000057657	PRDM1	protein_coding	161.687	2.23722	0.521945	4.28631	1.81667e-05	0.000839486	39.2219	181.984	26.6975	57.39	21.9454	222.898	366.05	241.777	338.85	89.1311
8116	ENSG00000151790	TDO2	protein_coding	19.4492	4.68946	1.09458	4.28425	1.83356e-05	0.000845337	4.17254	8.20421	0	1.71313	0	20.5979	79.4142	74.3327	40.9742	4.95173
28037	ENSG00000266010	GATA6-AS1	lincRNA	79.3798	-1.44828	0.338252	-4.28166	1.85504e-05	0.000853275	148.542	70.1087	120.841	120.776	93.6339	42.667	49.6339	49.2943	36.4215	24.7586
28248	ENSG00000041353	RAB27B	protein_coding	87.2317	-2.06149	0.481584	-4.28065	1.86345e-05	0.000855178	83.4508	170.051	221.308	203.863	54.1321	37.5175	25.4374	93.894	27.9665	12.3793
14009	ENSG00000196924	FLNA	protein_coding	3087.41	1.77068	0.413816	4.27892	1.87806e-05	0.000859909	652.585	1261.21	962.516	950.789	1926.81	2919.75	4569.42	2556.26	7506.73	1975.74
18278	ENSG00000151468	CCDC3	protein_coding	78.0459	1.80598	0.42217	4.27784	1.88711e-05	0.000862084	33.3803	49.2252	10.5385	54.8203	62.9103	198.622	118.501	133.016	139.182	101.51
4620	ENSG00000222033	LINC01124	lincRNA	13.12	-3.14413	0.735436	-4.2752	1.90968e-05	0.000870406	44.2289	11.9334	29.5078	38.5455	36.5757	3.67819	0.620424	9.3894	3.9023	4.95173
15054	ENSG00000104415	WISP1	protein_coding	61.6188	3.57119	0.837157	4.26586	1.99136e-05	0.00090557	9.17959	20.1376	2.81027	23.9839	14.6303	140.507	307.11	82.1572	252.349	29.7104
29790	ENSG00000171223	JUNB	protein_coding	1647.41	1.94421	0.455873	4.26481	2.00076e-05	0.000907784	903.772	509.407	472.827	727.225	914.393	1668.43	2431.44	3313.68	3927.67	2629.37
951	ENSG00000222009	BTBD19	protein_coding	33.1996	2.35595	0.552568	4.26364	2.01124e-05	0.000910474	6.67606	29.0876	7.02567	11.9919	7.31515	46.3452	125.946	27.3857	112.516	17.3311
17428	ENSG00000110721	CHKA	protein_coding	321.684	-1.31112	0.307575	-4.26278	2.019e-05	0.000911924	634.226	402.006	464.397	410.296	386.24	151.541	199.156	251.166	266.007	96.5587
14817	ENSG00000169439	SDC2	protein_coding	230.081	1.99426	0.467927	4.26191	2.02689e-05	0.000913425	50.905	211.818	82.2003	95.9355	61.4472	486.257	581.337	295.766	788.266	86.6553
8403	ENSG00000183580	FBXL7	protein_coding	33.6726	2.35668	0.553929	4.25448	2.0954e-05	0.000942175	5.00705	20.8834	7.72823	11.9919	4.38909	25.0117	80.6551	39.9049	104.712	12.3793
9414	ENSG00000164266	SPINK1	protein_coding	1829.3	-1.73661	0.408297	-4.25329	2.10657e-05	0.000945076	4424.56	1246.29	2387.32	2037.77	5525.86	953.386	539.769	1137.68	303.079	1767.77
30866	ENSG00000130529	TRPM4	protein_coding	1896.27	-1.77788	0.418203	-4.25123	2.12597e-05	0.000951646	2652.07	1485.71	2147.75	1674.59	3650.26	677.522	557.14	971.803	543.071	510.028
5027	ENSG00000079308	TNS1	protein_coding	312.162	2.19893	0.517916	4.24571	2.17899e-05	0.000972322	40.8909	195.409	127.165	119.063	35.1127	426.67	836.331	286.377	1178.5	79.2277
9841	ENSG00000137266	SLC22A23	protein_coding	587.214	-1.22149	0.287719	-4.24542	2.18188e-05	0.000972322	718.511	677.22	855.726	994.474	457.928	401.658	292.22	367.751	230.886	292.152
2109	ENSG00000132688	NES	protein_coding	268.797	1.3581	0.320282	4.24034	2.23179e-05	0.000992355	101.81	126.792	110.303	107.927	209.213	177.289	320.759	345.06	420.148	420.897
2479	ENSG00000135838	NPL	protein_coding	67.8851	1.32754	0.313359	4.23648	2.27056e-05	0.00100735	50.905	77.567	36.5335	25.697	19.0194	150.07	130.909	68.0731	96.9072	61.8966
11088	ENSG00000118523	CTGF	protein_coding	389.09	2.61218	0.616904	4.23433	2.29235e-05	0.00101477	45.0634	98.4505	134.19	127.628	57.0581	838.627	1145.3	616.571	1368.41	96.5587
27651	ENSG00000184557	SOCS3	protein_coding	278.317	3.74123	0.88649	4.22028	2.44e-05	0.00107775	10.8486	108.146	33.0206	101.075	14.6303	186.116	938.701	685.426	990.535	232.731
3108	ENSG00000223519	KIF28P	transcribed_unitary_pseudogene	11.1574	-2.65235	0.62857	-4.21966	2.44672e-05	0.00107834	35.8838	17.9001	9.83593	40.2586	10.2412	3.67819	3.10212	3.1298	4.55269	2.47586
4832	ENSG00000138411	HECW2	protein_coding	29.6872	3.52217	0.835336	4.21647	2.48155e-05	0.00109128	4.17254	32.8168	2.81027	4.28283	0	44.8739	134.632	32.8629	65.0384	24.7586
10427	ENSG00000146197	SCUBE3	protein_coding	21.9718	4.17531	0.990752	4.21428	2.50572e-05	0.00109949	1.66902	2.98335	3.51283	0.856567	5.85212	130.944	53.3564	25.0384	20.8123	9.90346
5253	ENSG00000188042	ARL4C	protein_coding	210.081	1.89164	0.44935	4.20972	2.55693e-05	0.00111951	53.4085	94.7213	67.4464	101.931	124.357	370.761	363.568	406.874	546.323	86.6553
32571	ENSG00000230061	TRPM2-AS	antisense	34.967	4.89455	1.16294	4.20879	2.56745e-05	0.00112166	3.33803	0	0	0.856567	156.544	28.6899	69.4875	60.2486	99.5088	101.51
31641	ENSG00000234928	LINC01659	lincRNA	8.67536	-4.72226	1.12367	-4.20252	2.63957e-05	0.00115066	0.834508	10.4417	20.3744	37.6889	8.77818	0	0	0	2.60154	0
6844	ENSG00000114450	GNB4	protein_coding	111.84	1.66723	0.397477	4.19453	2.73439e-05	0.0011894	33.3803	116.351	39.3437	83.9436	17.5564	164.047	276.709	120.497	248.447	66.8483
20075	ENSG00000167566	NCKAP5L	protein_coding	57.7329	1.50671	0.360436	4.18025	2.91188e-05	0.00126386	28.3733	60.4128	24.5898	50.5374	13.1673	105.932	122.844	65.7258	186.66	29.7104
20436	ENSG00000197301	AC090673.1	antisense	9.06551	5.64424	1.35094	4.17802	2.94053e-05	0.00127353	0.834508	0	1.40513	0	1.46303	26.483	18.6127	0.78245	27.3161	24.7586
3875	ENSG00000115363	EVA1A	protein_coding	29.5268	3.24793	0.777555	4.17711	2.9524e-05	0.00127591	10.8486	2.23751	7.02567	23.1273	0	54.4372	96.1657	47.7294	119.671	17.3311
6115	ENSG00000113805	CNTN3	protein_coding	19.7759	-3.89782	0.933691	-4.17464	2.98458e-05	0.00128704	10.0141	82.0421	94.1439	29.9798	4.38909	2.94255	1.24085	11.7367	0.650384	0
12636	ENSG00000128596	CCDC136	protein_coding	18.6995	2.81427	0.674801	4.17051	3.03918e-05	0.00130776	4.17254	10.4417	2.1077	2.5697	1.46303	58.851	26.0578	9.3894	39.023	19.8069
8205	ENSG00000150630	VEGFC	protein_coding	15.9071	2.7657	0.663594	4.16776	3.07607e-05	0.00132079	3.33803	9.69588	0.702567	12.8485	0	31.6324	36.605	20.3437	49.4292	4.95173
11885	ENSG00000106624	AEBP1	protein_coding	1118.51	2.54674	0.611322	4.16596	3.1005e-05	0.00132844	152.715	376.648	194.611	240.695	558.877	2326.82	1886.71	668.212	3424.92	309.483
14357	ENSG00000104687	GSR	protein_coding	502.354	-1.42957	0.343215	-4.16523	3.11039e-05	0.00132982	513.222	710.037	913.337	848.001	411.111	303.818	158.828	425.653	228.935	173.311
28868	ENSG00000149633	KIAA1755	protein_coding	66.9406	2.10104	0.50454	4.16427	3.12349e-05	0.00133258	21.6972	33.5627	5.62053	27.4101	38.0388	81.6558	89.9614	102.501	243.244	49.5173
25865	ENSG00000167693	NXN	protein_coding	75.1255	2.03601	0.490536	4.15058	3.31639e-05	0.00141186	26.7042	29.8335	12.6462	41.1152	32.1866	110.346	147.661	71.9854	248.447	27.2345
15765	ENSG00000213694	S1PR3	protein_coding	33.4357	3.65986	0.882415	4.14755	3.36059e-05	0.00142765	1.66902	22.3751	6.3231	6.85253	0	113.288	120.362	40.6874	115.768	9.90346
2260	ENSG00000162733	DDR2	protein_coding	186.612	2.34183	0.564707	4.14698	3.36886e-05	0.00142773	18.3592	132.013	68.149	99.3618	5.85212	286.163	773.048	135.364	530.713	37.138
32528	ENSG00000160191	PDE9A	protein_coding	669.671	-1.68313	0.40591	-4.14656	3.37507e-05	0.00142773	740.208	180.493	168.616	155.039	1018.27	113.288	49.0135	96.2413	156.092	148.552
15434	ENSG00000164970	FAM219A	protein_coding	93.5446	1.34197	0.323884	4.14338	3.42226e-05	0.00144464	43.3944	111.13	44.2617	73.6647	32.1866	172.875	314.555	78.245	156.092	86.6553
28435	ENSG00000125895	TMEM74B	protein_coding	60.314	2.17003	0.523836	4.14257	3.43433e-05	0.00144668	15.0211	25.3585	4.91797	11.1354	55.5951	63.2648	55.8381	86.8519	38.3727	284.724
25047	ENSG00000150281	CTF1	protein_coding	9.16624	3.72308	0.898852	4.14204	3.44233e-05	0.00144701	0.834508	0	2.81027	0.856567	1.46303	19.1266	7.44508	11.7367	37.7223	4.95173
8826	ENSG00000152413	HOMER1	protein_coding	16.2968	2.80584	0.677535	4.14125	3.45414e-05	0.00144893	7.51057	11.9334	2.1077	4.28283	4.38909	36.0462	73.8304	20.3437	20.8123	44.5656
19066	ENSG00000014919	COX15	protein_coding	325.791	-0.894624	0.216162	-4.13868	3.49307e-05	0.00146219	403.067	362.477	462.289	346.053	498.893	189.795	235.141	175.269	227.634	292.152
16240	ENSG00000167157	PRRX2	protein_coding	14.5353	2.83077	0.6852	4.1313	3.60723e-05	0.00150683	7.51057	0.745837	2.81027	1.71313	8.77818	30.1611	23.5761	13.3016	50.73	22.2828
25319	ENSG00000140937	CDH11	protein_coding	231.425	2.32096	0.562064	4.12936	3.63769e-05	0.00151639	25.8697	175.272	68.8515	180.736	13.1673	646.626	766.844	276.205	911.188	39.6138
19218	ENSG00000197893	NRAP	protein_coding	44.0901	-3.36056	0.814558	-4.12563	3.69727e-05	0.00153802	21.6972	9.69588	35.1283	38.5455	43.8909	2.20691	0	7.8245	1.95115	4.95173
25570	ENSG00000166816	LDHD	protein_coding	337.373	-3.12087	0.756639	-4.12464	3.71313e-05	0.00154141	310.437	278.943	179.154	100.218	491.578	11.7702	3.10212	100.936	32.5192	126.269
14627	ENSG00000178860	MSC	protein_coding	38.0985	1.97794	0.480453	4.11682	3.84135e-05	0.00159106	8.34508	23.1209	14.0513	17.1313	21.9454	61.7936	84.3776	58.6837	127.475	17.3311
18803	ENSG00000222047	C10orf55	protein_coding	76.5806	3.55404	0.863388	4.11638	3.84864e-05	0.00159106	4.17254	46.2419	11.2411	14.5616	1.46303	89.0122	397.692	160.402	349.907	0
15800	ENSG00000106809	OGN	protein_coding	36.4663	5.34806	1.29966	4.11496	3.87243e-05	0.0015976	0	0.745837	0	0	0	8.09201	10.5472	0	52.6811	7.42759
10300	ENSG00000204388	HSPA1B	protein_coding	779.782	1.68488	0.410009	4.10936	3.96759e-05	0.00162679	513.222	355.764	363.227	299.798	639.344	803.316	1260.7	885.733	3136.15	1691.02
21348	ENSG00000120694	HSPH1	protein_coding	844.86	1.43297	0.348707	4.10939	3.96709e-05	0.00162679	821.156	673.491	609.828	601.31	342.349	2193.67	2010.17	914.684	1120.61	2052.49
28991	ENSG00000101017	CD40	protein_coding	83.301	1.5667	0.381224	4.10966	3.96238e-05	0.00162679	22.5317	58.1753	25.995	45.398	30.7236	88.2765	121.603	123.627	160.645	47.0414
25213	ENSG00000087245	MMP2	protein_coding	1443.88	2.07838	0.505845	4.10873	3.97843e-05	0.0016279	348.824	1077.73	434.889	494.239	544.247	3394.97	3897.5	1351.29	6042.72	359
485	ENSG00000271420	AL109936.2	lincRNA	19.6502	-3.63262	0.885214	-4.10367	4.06654e-05	0.00165718	25.8697	2.98335	17.5642	8.56567	67.2993	1.47128	0.620424	0.78245	1.30077	4.95173
26656	ENSG00000270885	RASL10B	protein_coding	16.9087	5.19349	1.26557	4.10367	4.06654e-05	0.00165718	4.17254	0	3.51283	0	1.46303	5.14946	65.1445	60.2486	33.82	64.3725
15979	ENSG00000188959	C9orf152	protein_coding	428.83	-1.2279	0.299418	-4.10095	4.11465e-05	0.00167338	707.663	621.282	786.172	726.369	474.021	289.106	284.774	376.358	288.771	195.593
17943	ENSG00000149591	TAGLN	protein_coding	2358.91	2.44185	0.595709	4.09905	4.14841e-05	0.00168368	305.43	660.066	807.249	419.718	910.004	3845.91	3832.36	1963.17	9433.82	423.373
29114	ENSG00000124225	PMEPA1	protein_coding	880.478	2.07836	0.507454	4.09567	4.20954e-05	0.00170503	404.736	443.773	233.955	313.503	809.055	2974.92	3182.15	759.759	1253.94	982.918
8497	ENSG00000164318	EGFLAM	protein_coding	21.6426	2.29811	0.561268	4.0945	4.23073e-05	0.00170671	8.34508	8.20421	5.62053	4.28283	11.7042	61.7936	35.9846	30.5155	61.7865	7.42759
18753	ENSG00000138308	PLA2G12B	protein_coding	22.5288	6.24289	1.52455	4.09491	4.22333e-05	0.00170671	0	0	1.40513	0	0	0	19.8536	6.2596	18.2108	61.8966
8447	ENSG00000113389	NPR3	protein_coding	7.62572	5.20712	1.27463	4.0852	4.40397e-05	0.00177302	0.834508	0	0	0.856567	0	39.7244	23.5761	3.1298	32.5192	0
18842	ENSG00000165424	ZCCHC24	protein_coding	140.619	1.69732	0.415629	4.08375	4.43149e-05	0.00178052	40.0564	73.8379	44.9643	48.8243	84.8557	228.048	208.462	122.062	315.436	81.7035
21011	ENSG00000175727	MLXIP	protein_coding	2006.26	-1.26391	0.30979	-4.07988	4.50588e-05	0.00180678	2218.12	2649.96	2800.43	2727.31	2384.74	801.109	1403.4	1263.66	1162.89	777.421
6644	ENSG00000018408	WWTR1	protein_coding	144.088	1.55785	0.381944	4.07873	4.52815e-05	0.00181208	81.7818	125.301	31.6155	80.5173	76.0775	313.382	226.455	171.357	418.847	86.6553
9620	ENSG00000120129	DUSP1	protein_coding	878.057	3.40414	0.835465	4.07454	4.6105e-05	0.00184135	100.975	87.2629	102.575	280.954	36.5757	397.98	1906.56	2064.1	2333.58	334.242
28867	ENSG00000198959	TGM2	protein_coding	490.78	2.63905	0.647788	4.07394	4.62236e-05	0.00184241	60.9191	249.11	150.349	162.748	52.6691	683.407	1012.53	995.276	1025.01	391.187
4235	ENSG00000172965	MIR4435-2HG	lincRNA	85.0271	1.54369	0.379117	4.0718	4.66504e-05	0.00185204	38.3874	55.9378	58.313	59.1031	52.6691	140.507	187.988	115.02	239.341	106.462
7635	ENSG00000156219	ART3	protein_coding	25.8966	-3.24307	0.796425	-4.07204	4.66033e-05	0.00185204	36.7183	52.2086	69.5541	158.465	14.6303	0	21.7148	5.47715	9.10538	7.42759
2223	ENSG00000158869	FCER1G	protein_coding	141.991	1.70001	0.417643	4.07048	4.69165e-05	0.00185615	21.6972	117.096	81.4977	59.1031	35.1127	222.163	172.478	205.002	318.038	69.3242
17574	ENSG00000054938	CHRDL2	protein_coding	30.393	3.87893	0.952968	4.07037	4.69395e-05	0.00185615	0	8.95004	5.62053	4.28283	0	33.1037	56.4586	28.1682	275.112	12.3793
17723	ENSG00000086991	NOX4	protein_coding	15.531	4.1313	1.01553	4.06814	4.73909e-05	0.0018703	4.17254	1.49167	0	0.856567	10.2412	50.0234	38.4663	11.7367	91.7042	4.95173
5353	ENSG00000204099	NEU4	protein_coding	452.365	-2.18285	0.537505	-4.06109	4.88448e-05	0.00192011	103.479	146.184	184.072	252.687	883.67	8.82765	9.92678	145.536	124.874	146.076
8869	ENSG00000249835	VCAN-AS1	antisense	60.3661	3.10979	0.765752	4.0611	4.88425e-05	0.00192011	5.00705	44.0044	7.02567	19.701	1.46303	119.173	215.907	74.3327	262.105	0
9117	ENSG00000164400	CSF2	protein_coding	10.8956	6.52401	1.60805	4.0571	4.9685e-05	0.00194931	0.834508	0	0	0	0	0	94.9248	5.47715	50.0796	9.90346
27948	ENSG00000154864	PIEZO2	protein_coding	14.8045	3.60982	0.890053	4.05573	4.99771e-05	0.00195693	0	8.95004	1.40513	1.71313	0	16.184	37.2254	6.2596	65.6888	7.42759
7610	ENSG00000163735	CXCL5	protein_coding	246.659	7.07867	1.74798	4.04962	5.13007e-05	0.00200483	0.834508	0.745837	18.9693	8.56567	0	44.1383	1218.51	1525	680.302	29.7104
1328	ENSG00000171502	COL24A1	protein_coding	16.9266	2.7989	0.691327	4.04859	5.15274e-05	0.00200977	0.834508	12.6792	2.81027	5.1394	1.46303	39.7244	101.749	7.8245	28.6169	7.42759
28545	ENSG00000125869	LAMP5	protein_coding	16.6472	3.18547	0.786916	4.04804	5.16488e-05	0.00201059	4.17254	7.45837	1.40513	0	1.46303	27.2186	9.30636	19.5612	61.1361	19.8069
9436	ENSG00000157510	AFAP1L1	protein_coding	32.1643	2.75286	0.680247	4.04685	5.19111e-05	0.00201687	5.00705	51.4627	5.62053	16.2748	0	57.3797	93.684	53.2066	90.4034	32.1862
27534	ENSG00000170190	SLC16A5	protein_coding	264.99	-1.41195	0.349057	-4.04505	5.23126e-05	0.00202461	457.31	282.672	210.77	155.895	778.332	130.208	100.509	104.066	81.9484	264.918
31640	ENSG00000248409	AP000344.2	unprocessed_pseudogene	11.9733	-3.98098	0.984148	-4.0451	5.22997e-05	0.00202461	2.50352	32.8168	38.6412	72.8082	8.77818	2.20691	0.620424	0.78245	3.25192	0
3191	ENSG00000134321	RSAD2	protein_coding	54.9015	2.18103	0.539642	4.04162	5.30842e-05	0.00204946	24.2007	40.2752	9.13337	5.1394	19.0194	27.9542	146.42	118.932	102.11	54.469
23361	ENSG00000237289	CKMT1B	protein_coding	530.689	-1.62408	0.401872	-4.04128	5.31594e-05	0.00204946	1105.72	427.365	361.119	377.746	980.23	350.164	60.8015	210.479	149.588	341.669
25727	ENSG00000103241	FOXF1	protein_coding	124.038	1.54925	0.383418	4.04064	5.33061e-05	0.00205116	42.5599	105.909	58.313	72.8082	38.0388	147.128	207.222	235.517	346.655	51.9932
20933	ENSG00000152137	HSPB8	protein_coding	36.4308	2.4573	0.608491	4.03835	5.38285e-05	0.00206728	0.834508	16.4084	12.6462	13.7051	5.85212	43.4026	66.3853	32.8629	165.198	7.42759
9514	ENSG00000170624	SGCD	protein_coding	43.2434	2.46489	0.610498	4.03751	5.40225e-05	0.00207076	8.34508	41.021	18.9693	12.8485	0	48.5521	143.938	39.9049	170.401	24.7586
5224	ENSG00000182600	SNORC	protein_coding	748.869	-2.57986	0.639596	-4.03359	5.49322e-05	0.00209759	1281.8	261.789	278.919	275.815	3422.03	100.782	44.6705	179.181	98.8584	406.042
12379	ENSG00000224729	PCOLCE-AS1	antisense	65.2861	2.54774	0.631562	4.03403	5.4828e-05	0.00209759	5.84155	47.7336	21.077	27.4101	5.85212	162.576	168.135	74.3327	272.511	2.47586
3332	ENSG00000084710	EFR3B	protein_coding	14.9726	-2.28606	0.566877	-4.03272	5.51339e-05	0.00209909	34.2148	59.6669	24.5898	45.398	7.31515	2.94255	13.0289	3.91225	11.0565	4.95173
11018	ENSG00000198523	PLN	protein_coding	37.181	2.96153	0.734412	4.03252	5.51811e-05	0.00209909	1.66902	11.9334	15.4565	13.7051	0	68.4143	69.4875	40.6874	124.874	9.90346
27911	ENSG00000264127	SCML2P1	processed_pseudogene	98.9025	-2.70573	0.671228	-4.03102	5.55358e-05	0.00210857	70.9332	391.564	366.74	284.38	74.6145	51.4946	75.6917	55.5539	46.8277	0
2644	ENSG00000188783	PRELP	protein_coding	62.3733	3.15066	0.781834	4.02983	5.58181e-05	0.00211527	0.834508	5.96669	9.83593	1.71313	8.77818	70.6212	27.2986	12.5192	198.367	9.90346
17703	ENSG00000151376	ME3	protein_coding	241.738	-1.37741	0.342035	-4.0271	5.64694e-05	0.00212958	466.49	277.451	559.243	449.698	270.66	111.817	168.135	244.124	182.758	103.986
24540	ENSG00000168140	VASN	protein_coding	71.6249	1.93134	0.479564	4.02728	5.64252e-05	0.00212958	20.8627	44.0044	21.077	24.8404	55.5951	104.461	129.669	89.9817	216.578	79.2277
26782	ENSG00000108342	CSF3	protein_coding	30.2581	3.77481	0.937397	4.02691	5.65148e-05	0.00212958	7.51057	0	1.40513	10.2788	4.38909	5.8851	133.391	32.0804	239.341	14.8552
30953	ENSG00000174562	KLK15	protein_coding	34.6335	-3.75805	0.93343	-4.02606	5.67185e-05	0.00213323	105.148	8.20421	84.308	25.697	71.6884	2.20691	2.48169	7.8245	5.85346	4.95173
6234	ENSG00000241777	AC092185.1	unprocessed_pseudogene	6.35755	-6.25291	1.55357	-4.02486	5.70085e-05	0.00213611	25.8697	5.22086	4.2154	14.5616	11.7042	0	0	0	0	0
10222	ENSG00000137331	IER3	protein_coding	996.226	2.21923	0.551327	4.02525	5.69157e-05	0.00213611	451.469	199.138	264.868	347.766	953.895	2237.07	2613.22	2287.88	2464.96	589.256
6410	ENSG00000144908	ALDH1L1	protein_coding	289.51	-3.01278	0.748973	-4.02255	5.75714e-05	0.00215317	940.49	667.524	252.221	406.013	896.837	313.382	2.48169	157.272	29.9177	54.469
6077	ENSG00000172340	SUCLG2	protein_coding	1227.4	-0.887398	0.220731	-4.02027	5.81326e-05	0.0021701	1230.9	1450.65	1955.95	1468.16	1199.68	961.478	671.919	929.551	793.469	591.732
20239	ENSG00000139572	GPR84	protein_coding	6.30556	4.11033	1.02323	4.01701	5.89412e-05	0.00219619	0	2.23751	2.1077	0.856567	0	8.82765	19.8536	17.9963	33.1696	7.42759
17408	ENSG00000167799	NUDT8	protein_coding	218.043	-1.97504	0.491987	-4.01441	5.95946e-05	0.00221641	286.236	94.7213	85.0106	79.6607	912.93	34.575	14.8902	48.5119	55.933	230.255
30747	ENSG00000169515	CCDC8	protein_coding	27.3156	2.75901	0.688208	4.00897	6.09834e-05	0.00226385	2.50352	6.71253	2.81027	5.1394	11.7042	41.1957	51.4952	8.60695	66.3392	9.90346
17244	ENSG00000168065	SLC22A11	protein_coding	18.8269	-3.37158	0.841227	-4.00793	6.1252e-05	0.00226961	56.7465	76.8212	51.2874	39.4021	23.4085	0	4.34297	8.60695	4.55269	14.8552
21770	ENSG00000134871	COL4A2	protein_coding	1274.16	1.81003	0.45227	4.0021	6.27829e-05	0.00232204	335.472	1099.36	480.556	812.882	520.838	2705.68	3277.7	2131.39	4408.95	547.166
9986	ENSG00000272168	CASC15	lincRNA	15.996	2.84086	0.710152	4.00035	6.3248e-05	0.00233492	1.66902	8.95004	0	6.85253	13.1673	37.5175	55.2177	15.649	48.1284	9.90346
15973	ENSG00000095203	EPB41L4B	protein_coding	780.038	-1.01829	0.25485	-3.99567	6.45128e-05	0.00237723	917.124	941.992	1247.76	813.739	841.242	500.969	550.316	528.936	370.719	410.994
16193	ENSG00000167123	CERCAM	protein_coding	192.29	2.35337	0.589639	3.99121	6.57381e-05	0.00241793	28.3733	132.759	37.9386	32.5495	100.949	354.577	423.749	145.536	693.309	81.7035
17150	ENSG00000255118	AP003306.2	antisense	25.1134	-2.81444	0.705441	-3.98962	6.618e-05	0.00242972	30.8768	41.021	50.5848	85.6567	30.7236	3.67819	10.5472	27.3857	9.10538	0
12253	ENSG00000188175	HEPACAM2	protein_coding	340.063	-3.93233	0.985908	-3.98853	6.64833e-05	0.00243584	254.525	354.273	1364.38	1101.54	38.0388	2.20691	1.24085	103.283	30.5681	22.2828
31642	ENSG00000227755	AP000344.1	transcribed_processed_pseudogene	16.849	-4.54341	1.13923	-3.98815	6.65903e-05	0.00243584	8.34508	0.745837	16.8616	41.1152	54.1321	0	0.620424	0	6.50384	0
24046	ENSG00000140511	HAPLN3	protein_coding	95.9028	2.06754	0.518962	3.984	6.77662e-05	0.00247433	41.7254	58.9211	18.9693	37.6889	95.0969	215.542	176.821	166.662	226.984	76.7518
5090	ENSG00000175084	DES	protein_coding	1786.62	2.75398	0.691556	3.9823	6.8252e-05	0.00248753	85.1198	12.6792	244.493	96.7921	730.052	445.061	554.659	383.4	5028.12	507.552
24140	ENSG00000182175	RGMA	protein_coding	28.0358	2.88825	0.726093	3.9778	6.95572e-05	0.00253049	0.834508	15.6626	4.2154	5.99597	1.46303	50.0234	39.7071	19.5612	79.9972	7.42759
9105	ENSG00000198108	CHSY3	protein_coding	9.77025	3.02028	0.759517	3.97657	6.99153e-05	0.0025389	2.50352	6.71253	1.40513	5.1394	0	30.1611	46.5318	10.1718	33.82	4.95173
1780	ENSG00000131781	FMO5	protein_coding	254.834	-1.66764	0.419538	-3.97495	7.03952e-05	0.00254708	142.701	237.176	415.217	345.196	158.007	55.1728	128.428	107.978	55.933	61.8966
27958	ENSG00000141401	IMPA2	protein_coding	400.329	-1.3363	0.336149	-3.97531	7.02872e-05	0.00254708	695.145	428.11	583.13	477.964	670.067	249.381	186.127	372.446	167.149	195.593
28565	ENSG00000101230	ISM1	protein_coding	6.05356	4.95682	1.24849	3.97025	7.17962e-05	0.00258841	0	1.49167	0	0.856567	0	27.2186	27.2986	1.5649	26.6657	4.95173
31682	ENSG00000099998	GGT5	protein_coding	214.28	2.06165	0.519248	3.97046	7.17338e-05	0.00258841	50.905	88.7546	40.0463	38.5455	80.4666	219.22	289.117	197.96	444.863	103.986
9526	ENSG00000135074	ADAM19	protein_coding	161.049	1.87609	0.472699	3.96889	7.22084e-05	0.00259859	45.0634	165.576	61.1233	95.0789	26.3345	386.945	487.033	187.006	407.791	79.2277
25283	ENSG00000140859	KIFC3	protein_coding	135.047	2.28377	0.575855	3.96588	7.31268e-05	0.00262606	22.5317	72.3462	22.4821	55.6768	45.3539	199.358	335.029	188.57	308.932	66.8483
27184	ENSG00000049283	EPN3	protein_coding	285.41	-2.24419	0.565924	-3.96553	7.32341e-05	0.00262606	471.497	187.951	212.878	173.027	715.421	116.966	18.6127	75.8976	37.0719	126.269
2791	ENSG00000162772	ATF3	protein_coding	327.829	2.64913	0.668423	3.96325	7.39351e-05	0.00264645	77.6092	26.8501	73.0669	104.501	68.7624	141.242	498.2	674.472	1006.14	257.49
5023	ENSG00000115461	IGFBP5	protein_coding	991.323	2.19555	0.554631	3.95857	7.53995e-05	0.00269405	72.6022	529.544	499.525	662.126	83.3927	1474.22	2929.64	904.512	4053.19	230.255
2368	ENSG00000230630	DNM3OS	antisense	32.8226	2.5768	0.652358	3.94997	7.81597e-05	0.00278769	0	23.1209	11.2411	23.1273	2.92606	98.5754	70.1079	34.4278	76.0949	27.2345
7613	ENSG00000081041	CXCL2	protein_coding	224.694	2.3114	0.586189	3.94309	8.04388e-05	0.00286388	92.6304	72.3462	65.3387	114.78	121.431	153.748	654.547	410.004	550.225	552.118
21381	ENSG00000133104	SPART	protein_coding	95.3984	1.88619	0.478481	3.94203	8.0795e-05	0.00287145	16.6902	67.8712	40.0463	62.5294	13.1673	114.024	418.166	114.238	167.799	29.7104
386	ENSG00000117115	PADI2	protein_coding	1177.51	-2.40814	0.611228	-3.93984	8.15367e-05	0.0028868	574.141	517.611	1143.08	457.407	1405.97	107.403	28.5395	337.236	173.002	185.69
2656	ENSG00000143845	ETNK2	protein_coding	10.394	2.8965	0.735278	3.93932	8.17133e-05	0.0028868	1.66902	5.22086	2.1077	0.856567	1.46303	27.2186	9.92678	17.2139	15.6092	12.3793
17876	ENSG00000109846	CRYAB	protein_coding	105.004	2.07815	0.527576	3.93905	8.18041e-05	0.0028868	16.6902	43.2585	20.3744	16.2748	38.0388	107.403	104.852	71.2029	301.778	54.469
25502	ENSG00000172137	CALB2	protein_coding	32.1326	4.72081	1.19816	3.94004	8.14686e-05	0.0028868	0	0.745837	0.702567	0	1.46303	47.8164	13.6493	1.5649	9.75576	9.90346
12100	ENSG00000049540	ELN	protein_coding	237.878	2.47739	0.629183	3.93747	8.23442e-05	0.00290075	24.2007	88.0088	78.6875	98.5052	79.0036	904.834	127.187	302.026	924.196	84.1794
25300	ENSG00000103034	NDRG4	protein_coding	20.0907	2.00564	0.509461	3.9368	8.25757e-05	0.00290379	4.17254	6.71253	11.2411	8.56567	8.77818	10.2989	32.262	31.298	49.4292	44.5656
3430	ENSG00000162949	CAPN13	protein_coding	163.824	-2.42882	0.618323	-3.92807	8.56308e-05	0.0030044	69.2641	35.8002	354.796	190.158	140.451	0.735638	16.131	64.9433	27.9665	49.5173
17142	ENSG00000167994	RAB3IL1	protein_coding	69.2932	1.8757	0.4776	3.92735	8.58872e-05	0.0030044	10.8486	29.0876	18.9693	17.1313	21.9454	56.6441	75.6917	42.2523	127.475	64.3725
19563	ENSG00000182326	C1S	protein_coding	1330.42	1.92128	0.489156	3.92775	8.57436e-05	0.0030044	157.722	1176.93	608.423	971.347	174.1	2522.5	2617.57	1910.74	4334.16	408.518
4473	ENSG00000169554	ZEB2	protein_coding	192.931	1.38061	0.351595	3.92672	8.61139e-05	0.00300707	68.4296	146.93	76.5798	122.489	24.8715	197.887	452.289	170.574	282.267	69.3242
19100	ENSG00000107821	KAZALD1	protein_coding	273.734	-2.17994	0.555516	-3.92418	8.70272e-05	0.00302839	672.613	164.83	159.483	185.018	839.779	39.7244	37.2254	86.8519	80.6476	264.918
19565	ENSG00000159403	C1R	protein_coding	1234.55	1.6357	0.416827	3.92418	8.7027e-05	0.00302839	281.229	750.312	452.453	654.417	577.897	2152.48	1363.07	1424.84	2922.83	718.001
24890	ENSG00000184730	APOBR	protein_coding	1839.36	-1.89177	0.48222	-3.92304	8.74388e-05	0.00303744	2075.42	1171.71	1476.79	1158.08	3337.17	359.727	206.601	798.099	617.865	703.146
4771	ENSG00000188738	FSIP2	protein_coding	73.5513	-1.85609	0.473317	-3.92145	8.80189e-05	0.00305229	147.708	189.443	61.1233	98.5052	76.0775	37.5175	23.5761	48.5119	20.8123	27.2345
27525	ENSG00000167861	HID1	protein_coding	508.748	-1.28366	0.327485	-3.91974	8.86432e-05	0.00306862	887.082	433.331	536.761	716.946	816.37	769.477	162.551	251.166	155.442	247.586
23322	ENSG00000168907	PLA2G4F	protein_coding	265.484	-1.57243	0.40145	-3.91687	8.9705e-05	0.00310001	443.958	437.806	207.257	324.639	305.773	159.633	155.106	93.894	76.7453	94.0829
340	ENSG00000173641	HSPB7	protein_coding	22.3265	2.75655	0.704088	3.91507	9.03788e-05	0.00311791	0.834508	2.23751	5.62053	5.99597	11.7042	33.8393	39.7071	11.7367	84.5499	7.42759
25079	ENSG00000140678	ITGAX	protein_coding	138.198	1.92322	0.492229	3.90717	9.33846e-05	0.00321606	19.1937	137.234	37.236	98.5052	39.5018	219.956	282.913	174.486	322.591	86.6553
27611	ENSG00000182534	MXRA7	protein_coding	244.862	1.64584	0.421382	3.90583	9.39041e-05	0.0032284	90.9613	120.826	174.237	121.632	86.3187	478.164	598.088	217.521	714.772	94.0829
31368	ENSG00000206159	GYG2P1	transcribed_unprocessed_pseudogene	34.3673	-2.51472	0.644354	-3.90271	9.51235e-05	0.00326471	77.6092	0	56.2053	44.5415	77.5405	8.09201	0.620424	26.6033	1.95115	14.8552
7005	ENSG00000172061	LRRC15	protein_coding	22.8238	3.56437	0.91357	3.90158	9.55662e-05	0.00327265	0	13.4251	3.51283	5.1394	7.31515	82.3914	109.195	12.5192	85.2003	4.95173
26232	ENSG00000109099	PMP22	protein_coding	425.572	1.72935	0.443277	3.90129	9.56819e-05	0.00327265	77.6092	199.138	135.595	162.748	102.412	521.567	544.732	452.256	801.273	155.979
32196	ENSG00000073146	MOV10L1	protein_coding	7.44528	4.99207	1.28026	3.89927	9.64814e-05	0.00329436	0	0.745837	0	2.5697	0	19.8622	19.2331	3.1298	26.0154	4.95173
5543	ENSG00000182247	UBE2E2	protein_coding	32.5047	1.76579	0.45299	3.89808	9.69588e-05	0.00330502	15.8556	22.3751	11.2411	10.2788	10.2412	55.9085	45.9114	46.1645	92.3545	12.3793
4853	ENSG00000115896	PLCL1	protein_coding	11.4092	2.69027	0.690374	3.89684	9.74579e-05	0.00331639	2.50352	5.22086	4.91797	5.99597	0	19.1266	23.5761	12.5192	35.7711	24.7586
9270	ENSG00000113070	HBEGF	protein_coding	202.188	2.67948	0.688507	3.89172	9.95354e-05	0.00338133	68.4296	36.546	21.7796	41.1152	84.8557	175.082	318.898	738.633	349.907	203.021
17531	ENSG00000168010	ATG16L2	protein_coding	416.855	-1.08286	0.278346	-3.89035	0.000100099	0.00338897	465.655	537.748	392.032	491.669	485.726	200.829	220.25	249.602	290.722	155.979
32099	ENSG00000128274	A4GALT	protein_coding	54.4936	1.7903	0.460173	3.8905	0.000100036	0.00338897	23.3662	17.1542	9.83593	25.697	51.206	55.1728	105.472	46.947	160.645	76.7518
19353	ENSG00000180745	CLRN3	protein_coding	661.205	-1.47509	0.379734	-3.88452	0.000102531	0.00345959	1494.6	519.102	575.402	698.959	977.304	371.497	203.499	287.942	223.082	438.228
27595	ENSG00000176170	SPHK1	protein_coding	84.8711	2.45108	0.630982	3.88455	0.00010252	0.00345959	58.4155	13.4251	5.62053	25.697	80.4666	100.047	233.9	50.0768	332.997	74.2759
32118	ENSG00000188677	PARVB	protein_coding	151.129	2.23346	0.575256	3.88254	0.000103371	0.00348206	26.7042	49.9711	23.1847	16.2748	49.743	66.2074	42.8092	318.457	134.63	623.918
6933	ENSG00000244405	ETV5	protein_coding	43.101	2.12573	0.547655	3.8815	0.000103812	0.00349105	15.0211	21.6293	7.02567	14.5616	24.8715	105.932	40.3275	112.673	74.1438	24.7586
20545	ENSG00000175183	CSRP2	protein_coding	45.3858	2.00267	0.516793	3.87518	0.000106548	0.00357703	20.0282	49.2252	17.5642	22.2707	2.92606	94.8973	74.4508	117.367	125.524	7.42759
10213	ENSG00000146112	PPP1R18	protein_coding	206.267	1.54745	0.399659	3.87192	0.000107982	0.00361912	56.7465	163.338	103.277	142.19	89.2448	473.015	424.37	244.124	509.251	118.841
19084	ENSG00000075826	SEC31B	protein_coding	143.252	-1.347	0.347944	-3.87131	0.000108253	0.00362212	170.24	183.476	183.37	179.879	204.824	103.725	47.7726	66.5082	123.573	37.138
1782	ENSG00000226015	CCT8P1	processed_pseudogene	14.4302	-3.11984	0.806561	-3.86807	0.000109698	0.00365825	8.34508	25.3585	40.0463	39.4021	17.5564	5.14946	5.58381	1.5649	2.60154	2.47586
7400	ENSG00000163683	SMIM14	protein_coding	525.147	-1.28403	0.331941	-3.86823	0.000109628	0.00365825	670.944	645.895	1040.5	938.797	336.497	227.312	390.867	449.126	245.845	185.69
16898	ENSG00000179431	FJX1	protein_coding	14.6797	3.86066	0.998652	3.86587	0.000110695	0.00368535	1.66902	13.4251	0.702567	0.856567	2.92606	27.9542	44.6705	39.1225	70.8919	9.90346
12649	ENSG00000128602	SMO	protein_coding	56.0363	1.53827	0.397964	3.86535	0.000110929	0.00368701	19.1937	47.7336	16.159	41.9718	11.7042	52.2303	89.9614	104.848	154.791	14.8552
6789	ENSG00000188306	LRRIQ4	protein_coding	11.1664	-2.68767	0.695574	-3.86396	0.000111563	0.00370194	29.2078	18.6459	32.3181	40.2586	17.5564	2.20691	3.10212	8.60695	6.50384	2.47586
25690	ENSG00000103196	CRISPLD2	protein_coding	193.065	1.4511	0.375608	3.86333	0.000111853	0.00370541	79.2782	101.434	57.6105	106.214	89.2448	257.473	235.141	265.251	422.099	71.8001
5911	ENSG00000271858	CYB561D2	antisense	31.0278	-2.10264	0.544437	-3.86204	0.000112443	0.00371881	17.5247	20.1376	37.236	46.2546	71.6884	8.82765	2.48169	11.7367	7.80461	7.42759
27291	ENSG00000062716	VMP1	protein_coding	2243.58	1.12445	0.291604	3.85606	0.000115227	0.00380459	1346.06	1403.66	1389.68	1512.7	1776.12	4285.09	2848.99	3125.11	3168.67	3018.08
24020	ENSG00000136383	ALPK3	protein_coding	42.5158	1.97023	0.511445	3.85227	0.000117026	0.00385761	21.6972	31.3251	27.4001	11.1354	36.5757	86.8052	55.8381	94.6764	91.7042	128.745
13836	ENSG00000102038	SMARCA1	protein_coding	72.6504	1.78629	0.464054	3.84931	0.000118451	0.00389818	14.1866	54.4461	42.154	34.2627	21.9454	165.518	156.967	114.238	151.539	24.7586
21764	ENSG00000185950	IRS2	protein_coding	496.843	2.33356	0.606445	3.84793	0.000119118	0.00391369	115.997	131.267	85.0106	85.6567	191.657	1600.01	760.639	331.759	337.549	287.2
17942	ENSG00000149577	SIDT2	protein_coding	425.493	-0.966433	0.251419	-3.84391	0.000121089	0.00397192	468.993	374.41	381.494	319.499	772.479	182.438	266.782	199.525	210.074	272.345
29535	ENSG00000125726	CD70	protein_coding	6.58539	3.91059	1.0182	3.84068	0.000122692	0.00401135	1.66902	0	0.702567	1.71313	0	27.2186	7.44508	2.34735	26.6657	7.42759
32054	ENSG00000100417	PMM1	protein_coding	424.738	-1.47434	0.38385	-3.84093	0.000122568	0.00401135	572.472	211.818	407.489	309.221	987.545	114.759	114.778	215.174	180.807	235.207
5519	ENSG00000131378	RFTN1	protein_coding	160.887	1.99638	0.519923	3.83976	0.000123153	0.00401984	20.8627	161.847	52.6925	130.198	23.4085	354.577	318.277	233.953	523.559	74.2759
2238	ENSG00000173110	HSPA6	protein_coding	27.3021	2.19629	0.572165	3.83856	0.000123758	0.00403302	13.3521	13.4251	3.51283	17.1313	2.92606	41.1957	34.1233	23.4735	133.329	17.3311
4757	ENSG00000115252	PDE1A	protein_coding	16.4635	2.73018	0.71199	3.83458	0.000125779	0.00407895	0.834508	7.45837	7.02567	1.71313	1.46303	30.1611	29.1599	15.649	53.9819	2.47586
9319	ENSG00000272674	PCDHB16	protein_coding	8.37509	4.33179	1.12961	3.83477	0.000125684	0.00407895	4.17254	0.745837	0.702567	0	0	27.9542	8.68593	8.60695	62.4369	4.95173
28557	ENSG00000224961	LINC01752	lincRNA	36.165	-3.42092	0.892016	-3.83505	0.000125541	0.00407895	88.4578	31.3251	37.236	24.8404	96.5599	2.20691	1.24085	19.5612	4.55269	9.90346
4785	ENSG00000144366	GULP1	protein_coding	49.4884	2.30678	0.601771	3.83332	0.000126426	0.0040894	11.6831	29.8335	3.51283	23.9839	8.77818	94.8973	131.53	61.0311	113.817	9.90346
22848	ENSG00000166126	AMN	protein_coding	2306.91	-1.70551	0.444937	-3.83316	0.00012651	0.0040894	2061.23	995.692	1250.57	802.603	4021.87	325.152	306.489	1035.96	519.657	510.028
1116	ENSG00000184313	MROH7	protein_coding	52.2723	-2.77499	0.725	-3.82757	0.000129413	0.00416654	47.5669	25.3585	28.8052	8.56567	182.879	9.56329	3.10212	3.91225	3.9023	12.3793
4546	ENSG00000153250	RBMS1	protein_coding	147.539	1.88856	0.493362	3.82794	0.00012922	0.00416654	15.8556	120.826	49.1797	70.2385	36.5757	275.864	271.125	156.49	294.624	69.3242
17208	ENSG00000188070	C11orf95	protein_coding	103.114	1.43787	0.37568	3.82737	0.000129521	0.00416654	43.3944	95.4671	63.231	101.075	36.5757	97.1042	234.52	151.795	234.138	163.407
708	ENSG00000162522	KIAA1522	protein_coding	1171.64	-1.07501	0.280962	-3.82618	0.000130149	0.00416663	1429.51	1094.89	1168.37	1061.29	2184.3	595.867	725.896	729.243	507.95	661.056
21125	ENSG00000250208	FZD10-DT	processed_transcript	16.2653	3.99178	1.04326	3.82628	0.000130096	0.00416663	0	2.23751	0.702567	1.71313	1.46303	91.2191	38.4663	10.1718	5.85346	0
32570	ENSG00000142185	TRPM2	protein_coding	310.901	2.30206	0.601544	3.82692	0.000129758	0.00416663	60.0846	36.546	17.5642	14.5616	806.129	186.852	222.112	350.538	267.308	933.401
23559	ENSG00000103569	AQP9	protein_coding	19.6026	3.46518	0.905958	3.82488	0.000130837	0.00418199	5.00705	6.71253	0	26.5536	0	25.0117	119.121	32.8629	47.478	27.2345
14274	ENSG00000134013	LOXL2	protein_coding	253.479	2.00373	0.52403	3.82369	0.000131471	0.00419555	82.6163	275.214	77.2823	112.21	118.505	454.624	845.017	446.779	962.568	108.938
24534	ENSG00000126603	GLIS2	protein_coding	43.1566	2.00636	0.524874	3.82256	0.000132074	0.00420807	14.1866	25.3585	21.077	30.8364	7.31515	102.989	93.0636	50.8592	181.457	12.3793
5889	ENSG00000001617	SEMA3F	protein_coding	373.194	-1.75047	0.458071	-3.8214	0.000132699	0.00421455	912.117	296.097	516.386	477.964	1091.42	143.449	145.179	259.773	205.521	108.938
9781	ENSG00000146054	TRIM7	protein_coding	92.5707	-2.82386	0.738914	-3.82164	0.000132569	0.00421455	171.909	142.455	99.0619	28.2667	330.645	16.9197	7.44508	75.1152	19.5115	7.42759
23296	ENSG00000187446	CHP1	protein_coding	1187.64	-0.935076	0.244782	-3.82004	0.000133431	0.0042244	1689.04	1337.29	1085.47	918.24	1783.43	621.614	596.848	913.902	595.101	812.084
26325	ENSG00000176974	SHMT1	protein_coding	230.386	-1.03979	0.272189	-3.82012	0.000133387	0.0042244	329.631	240.159	296.483	339.2	296.995	139.036	94.9248	143.188	169.75	193.117
28306	ENSG00000081913	PHLPP1	protein_coding	123.454	-1.41451	0.370467	-3.81818	0.000134439	0.00424958	139.363	165.576	257.139	216.711	133.136	69.8856	96.7861	73.5503	48.1284	59.4207
30541	ENSG00000167601	AXL	protein_coding	175.577	1.64375	0.43078	3.81576	0.000135766	0.00428478	29.2078	108.892	54.0976	73.6647	83.3927	183.174	218.389	166.662	379.174	94.0829
31283	ENSG00000178935	ZNF552	protein_coding	84.1967	-1.24873	0.327453	-3.81348	0.000137023	0.00431763	115.162	154.388	168.616	133.624	67.2993	69.8856	78.1734	45.3821	38.3727	42.0897
11394	ENSG00000164488	DACT2	protein_coding	24.3599	-3.01569	0.790922	-3.81288	0.000137354	0.00432126	40.0564	6.71253	49.1797	35.1192	23.4085	2.94255	0	18.7788	1.30077	4.95173
700	ENSG00000162526	TSSK3	protein_coding	39.6164	-1.96315	0.51527	-3.80995	0.000138996	0.00435921	68.4296	45.496	61.1233	68.5253	62.9103	30.1611	14.2697	31.298	17.5604	0
18247	ENSG00000123243	ITIH5	protein_coding	216.41	1.71674	0.450589	3.80998	0.000138977	0.00435921	34.2148	53.7003	40.0463	58.2465	96.5599	161.105	81.8959	268.38	275.763	101.51
21768	ENSG00000187498	COL4A1	protein_coding	1188.68	2.27195	0.596636	3.80793	0.000140133	0.00438799	198.613	1279.86	382.196	719.516	122.894	2296.66	5126.56	2115.74	3976.45	418.421
11715	ENSG00000272568	AC005162.3	antisense	6.14866	-4.20364	1.1047	-3.80525	0.000141663	0.00441546	17.5247	13.4251	7.72823	7.7091	1.46303	0.735638	0	1.5649	0	0
19850	ENSG00000230519	HMGB1P49	processed_pseudogene	16.7918	-4.7321	1.24358	-3.80523	0.000141673	0.00441546	43.3944	2.23751	7.02567	11.1354	20.4824	0	0	0	0	9.90346
23627	ENSG00000035664	DAPK2	protein_coding	329.242	-1.18317	0.310902	-3.80561	0.000141458	0.00441546	680.124	330.406	400.463	424.857	545.71	166.99	322.62	162.75	150.889	257.49
920	ENSG00000142949	PTPRF	protein_coding	2018.18	-1.08688	0.285815	-3.80273	0.000143108	0.00445328	2249.83	2481.4	2756.17	2227.93	2730.01	1251.32	1420.15	1654.88	796.07	888.835
7422	ENSG00000154277	UCHL1	protein_coding	33.3861	2.76866	0.728343	3.80131	0.000143932	0.00446765	10.0141	5.22086	1.40513	2.5697	5.85212	58.851	46.5318	9.3894	65.0384	12.3793
14086	ENSG00000091879	ANGPT2	protein_coding	37.9711	2.11759	0.55709	3.80117	0.000144017	0.00446765	18.3592	31.3251	4.91797	22.2707	16.0933	52.9659	117.88	67.2907	129.426	19.8069
17315	ENSG00000172638	EFEMP2	protein_coding	250.959	1.93895	0.510474	3.79833	0.000145675	0.00451208	79.2782	99.9421	51.9899	62.5294	178.49	409.015	298.424	254.296	610.711	178.262
29142	ENSG00000087495	PHACTR3	protein_coding	17.6052	3.49108	0.919991	3.79469	0.000147826	0.00457165	3.33803	0.745837	5.62053	1.71313	0	30.1611	169.996	8.60695	22.1131	2.47586
20355	ENSG00000178498	DTX3	protein_coding	89.4919	1.36406	0.359713	3.79209	0.000149386	0.00461274	48.4014	56.6836	35.8309	60.8162	19.0194	144.185	114.778	88.4168	233.488	29.7104
3110	ENSG00000227953	LINC01341	processed_transcript	20.3554	-2.39277	0.631885	-3.78672	0.000152648	0.00469897	88.4578	31.3251	10.5385	48.8243	32.1866	12.5058	1.24085	5.47715	11.0565	7.42759
13052	ENSG00000198223	CSF2RA	protein_coding	66.0159	1.81492	0.479276	3.78679	0.000152606	0.00469897	5.00705	35.8002	16.159	49.6809	13.1673	73.5638	83.1368	52.4241	119.671	34.6621
18345	ENSG00000238246	AC069549.1	antisense	5.30529	-4.44077	1.17323	-3.78508	0.000153662	0.00472292	14.1866	3.72918	14.7539	2.5697	5.85212	0	0	0.78245	0.650384	0
76	ENSG00000162576	MXRA8	protein_coding	356.795	1.89953	0.502857	3.77748	0.000158424	0.00485849	110.155	183.476	135.595	132.768	160.933	668.695	586.3	302.808	1176.54	138.648
7398	ENSG00000109814	UGDH	protein_coding	495.676	-1.18183	0.312879	-3.77727	0.000158558	0.00485849	834.508	707.053	711.7	553.342	387.703	175.817	342.474	536.761	225.683	203.021
1066	ENSG00000116157	GPX7	protein_coding	24.3329	2.2783	0.603469	3.77534	0.000159788	0.00488867	10.0141	25.3585	10.5385	5.99597	2.92606	65.4718	32.8825	55.5539	83.8995	7.42759
7636	ENSG00000169245	CXCL10	protein_coding	67.5347	3.16783	0.839215	3.77475	0.000160168	0.0048922	5.84155	29.0876	11.2411	12.8485	10.2412	125.058	158.208	173.704	232.187	32.1862
23660	ENSG00000103710	RASL12	protein_coding	54.9873	1.78791	0.473695	3.7744	0.000160392	0.0048922	12.5176	34.3085	11.2411	23.1273	16.0933	47.0808	60.8015	32.0804	185.359	42.0897
7727	ENSG00000138646	HERC5	protein_coding	31.1224	2.38896	0.633838	3.76903	0.000163883	0.00499107	4.17254	28.3418	9.83593	3.42627	0	29.4255	52.1156	51.6417	48.7788	7.42759
1421	ENSG00000143036	SLC44A3	protein_coding	562.943	-0.98981	0.262708	-3.76771	0.000164749	0.00500221	917.959	508.661	907.716	603.88	1180.66	406.072	330.065	556.322	328.444	423.373
12183	ENSG00000234456	MAGI2-AS3	processed_transcript	37.6995	2.03213	0.539311	3.76801	0.000164553	0.00500221	8.34508	29.8335	14.0513	24.8404	1.46303	55.9085	102.37	31.298	106.013	17.3311
4319	ENSG00000019169	MARCO	protein_coding	32.8162	4.46095	1.18419	3.76709	0.000165163	0.0050072	0	3.72918	0	0	1.46303	47.8164	42.1888	0	39.023	9.90346
2739	ENSG00000203709	MIR29B2CHG	lincRNA	73.2268	-1.56924	0.416648	-3.76635	0.000165651	0.00501438	113.493	163.338	94.1439	144.76	58.5212	69.1499	34.7437	21.1261	22.1131	51.9932
899	ENSG00000117394	SLC2A1	protein_coding	395.386	1.68654	0.448102	3.76375	0.000167385	0.00505531	232.828	210.326	200.934	182.449	282.365	1432.29	914.504	622.048	362.914	745.235
6977	ENSG00000163347	CLDN1	protein_coding	269.132	2.89708	0.769922	3.76283	0.000168004	0.00505531	91.7959	150.659	58.313	49.6809	64.3733	1034.31	1185.01	263.686	665.343	373.856
21442	ENSG00000120658	ENOX1	protein_coding	6.6858	3.914	1.04001	3.76342	0.000167603	0.00505531	0	1.49167	0	2.5697	0	8.82765	14.2697	4.6947	40.3238	0
22813	ENSG00000214548	MEG3	lincRNA	486.238	2.10869	0.560403	3.76281	0.000168014	0.00505531	34.2148	278.943	115.221	215.855	141.914	573.797	910.162	273.857	1101.1	158.455
1957	ENSG00000163220	S100A9	protein_coding	205.332	2.07433	0.551405	3.76191	0.000168621	0.00505838	50.905	111.876	18.9693	184.162	155.081	488.463	245.688	438.172	246.496	797.228
27343	ENSG00000274565	AC080038.1	antisense	4.82324	4.46063	1.1857	3.76203	0.000168542	0.00505838	0	0	0.702567	0.856567	0	10.2989	5.58381	3.91225	18.8611	2.47586
22252	ENSG00000139926	FRMD6	protein_coding	78.1461	1.82454	0.485149	3.76079	0.000169377	0.00507346	12.5176	71.6003	33.0206	51.394	7.31515	122.116	302.146	75.1152	215.277	9.90346
5472	ENSG00000163520	FBLN2	protein_coding	179.771	2.82065	0.75073	3.75721	0.000171818	0.00513392	0	54.4461	34.4258	59.1031	30.7236	330.301	500.682	79.0274	651.034	34.6621
20881	ENSG00000135094	SDS	protein_coding	65.5349	2.18781	0.582316	3.75708	0.000171909	0.00513392	5.84155	39.5294	9.13337	10.2788	30.7236	8.82765	125.946	99.3711	181.457	54.469
21439	ENSG00000133106	EPSTI1	protein_coding	268.585	1.70333	0.453421	3.75661	0.000172228	0.00513579	88.4578	191.68	127.165	163.604	130.21	662.81	711.006	295.766	611.361	282.249
3434	ENSG00000013016	EHD3	protein_coding	28.0369	2.11964	0.564405	3.75553	0.000172972	0.0051503	6.67606	29.8335	9.83593	18.8445	2.92606	50.759	76.9325	42.2523	91.0538	17.3311
11383	ENSG00000146521	LINC01558	lincRNA	35.8782	2.45505	0.653952	3.75417	0.000173917	0.00517075	5.84155	5.22086	19.6719	5.99597	10.2412	36.0462	189.229	14.8665	37.0719	47.0414
17608	ENSG00000254933	AP000785.1	antisense	19.433	3.3878	0.902864	3.75228	0.000175236	0.00519735	0.834508	2.98335	9.83593	6.85253	0	20.5979	86.8593	20.3437	123.573	2.47586
32312	ENSG00000154654	NCAM2	protein_coding	7.40762	3.68578	0.982315	3.75214	0.000175332	0.00519735	1.66902	0.745837	0.702567	0.856567	0	18.3909	16.7514	1.5649	26.6657	2.47586
19976	ENSG00000139211	AMIGO2	protein_coding	86.8089	1.99867	0.533055	3.74946	0.000177219	0.00524552	25.0352	35.0543	34.4258	48.8243	20.4824	341.336	269.884	75.8976	263.406	17.3311
28838	ENSG00000101335	MYL9	protein_coding	1876.07	2.21485	0.59117	3.74656	0.000179277	0.00529859	204.454	256.568	232.55	159.321	1076.79	1458.03	1078.3	654.128	3504.27	1029.96
20742	ENSG00000171310	CHST11	protein_coding	65.9251	1.99156	0.531624	3.74618	0.000179546	0.00529873	10.8486	76.0754	19.6719	29.1233	13.1673	126.53	168.755	80.5923	159.994	37.138
8738	ENSG00000131711	MAP1B	protein_coding	64.6508	1.70228	0.454499	3.74541	0.000180103	0.00529882	46.7324	61.9045	9.83593	32.5495	2.92606	67.6787	166.274	48.5119	148.288	22.2828
12134	ENSG00000127946	HIP1	protein_coding	94.2429	1.4184	0.378756	3.74491	0.000180462	0.00529882	25.0352	121.571	51.2874	51.394	35.1127	128.001	222.112	103.283	204.221	84.1794
19606	ENSG00000166523	CLEC4E	protein_coding	7.49535	3.98926	1.06531	3.7447	0.000180609	0.00529882	0.834508	0	2.1077	1.71313	0	22.8048	34.7437	16.4314	9.10538	4.95173
31959	ENSG00000185022	MAFF	protein_coding	168.281	1.4203	0.379261	3.7449	0.000180465	0.00529882	95.9684	85.0254	94.8465	105.358	103.875	206.714	311.453	321.587	322.591	188.166
32330	ENSG00000154734	ADAMTS1	protein_coding	207.029	3.15753	0.844437	3.73922	0.000184594	0.00540783	2.50352	58.1753	37.9386	81.3739	8.77818	156.691	447.325	408.439	543.071	74.2759
8949	ENSG00000246763	RGMB-AS1	antisense	45.7512	-3.27284	0.875923	-3.73645	0.000186638	0.0054597	7.51057	76.8212	172.831	232.13	30.7236	2.20691	45.2909	7.8245	6.50384	2.47586
3893	ENSG00000224879	AC011754.1	sense_overlapping	515.434	-9.49631	2.54563	-3.73043	0.000191151	0.00558357	130.183	744.345	3.51283	8.56567	24.8715	1.47128	0	215.174	0	0
11482	ENSG00000146535	GNA12	protein_coding	173.389	1.19336	0.320073	3.72839	0.000192705	0.00562076	115.162	191.68	111.006	146.473	49.743	258.209	437.399	198.742	386.979	131.221
6472	ENSG00000163913	IFT122	protein_coding	312.747	-1.23125	0.33037	-3.72687	0.000193876	0.00564666	295.416	280.435	267.678	317.786	652.511	107.403	107.333	165.097	143.085	242.635
15300	ENSG00000107186	MPDZ	protein_coding	44.5219	2.56663	0.689132	3.72444	0.00019575	0.00569298	8.34508	64.142	8.4308	23.9839	0	86.0696	148.902	55.5539	133.979	14.8552
2597	ENSG00000198892	SHISA4	protein_coding	31.3564	2.34531	0.630092	3.72217	0.000197515	0.00573596	6.67606	23.1209	16.159	8.56567	0	58.851	55.8381	28.9506	90.4034	24.7586
11045	ENSG00000135547	HEY2	protein_coding	10.3139	2.4686	0.663931	3.71816	0.000200678	0.00581938	4.17254	9.69588	2.1077	5.99597	0	30.1611	33.5029	14.8665	33.82	2.47586
18020	ENSG00000076706	MCAM	protein_coding	363.957	1.98951	0.535607	3.7145	0.000203608	0.00588926	61.7536	370.681	89.9285	272.388	89.2448	718.718	1005.09	625.178	1243.53	165.883
29903	ENSG00000186115	CYP4F2	protein_coding	84.402	4.06079	1.09325	3.71441	0.000203677	0.00588926	5.00705	14.1709	9.13337	2.5697	2.92606	25.7473	61.4219	16.4314	197.717	173.311
7822	ENSG00000168743	NPNT	protein_coding	347.635	-2.20588	0.593963	-3.71383	0.000204145	0.00589428	610.025	553.411	687.813	771.767	332.108	218.484	76.3121	330.194	109.915	54.469
11041	ENSG00000146373	RNF217	protein_coding	57.6611	2.1394	0.576364	3.71189	0.000205718	0.0059226	36.7183	58.9211	7.02567	16.2748	5.85212	185.381	233.279	46.1645	86.5011	4.95173
16980	ENSG00000134574	DDB2	protein_coding	305.426	-1.14957	0.309692	-3.71197	0.000205651	0.0059226	509.884	243.143	309.129	371.75	738.83	253.059	138.975	140.059	189.262	200.545
17289	ENSG00000173727	AP000769.1	transcribed_unprocessed_pseudogene	22.2332	2.28504	0.615848	3.71039	0.000206937	0.00594915	0.834508	3.72918	3.51283	2.5697	2.92606	8.09201	9.92678	4.6947	20.8123	37.138
26677	ENSG00000277632	CCL3	protein_coding	49.6193	2.43992	0.657737	3.70957	0.000207612	0.00595513	12.5176	11.1876	13.3488	3.42627	27.7976	24.276	129.669	63.3784	128.776	17.3311
29073	ENSG00000182463	TSHZ2	protein_coding	26.0441	1.9758	0.532644	3.70941	0.000207741	0.00595513	6.67606	23.8668	8.4308	13.7051	8.77818	61.7936	43.4297	13.3016	117.72	34.6621
27987	ENSG00000168675	LDLRAD4	protein_coding	170.305	-1.27532	0.344213	-3.70503	0.000211367	0.00605042	428.102	225.989	329.504	282.667	238.474	162.576	160.69	160.402	117.069	54.469
25335	ENSG00000140931	CMTM3	protein_coding	126.308	1.81356	0.489554	3.70453	0.000211785	0.00605371	48.4014	62.6503	47.7745	24.8404	81.9296	267.036	181.784	111.108	344.053	71.8001
18929	ENSG00000107796	ACTA2	protein_coding	1810.84	2.19985	0.593888	3.70415	0.000212105	0.00605421	225.317	710.037	826.921	576.469	557.414	3753.22	3325.47	2585.21	6284.01	146.076
16045	ENSG00000041982	TNC	protein_coding	441.852	2.83022	0.764292	3.70306	0.000213018	0.00606298	37.5528	209.58	110.303	121.632	58.5212	674.58	2680.23	336.453	1837.99	81.7035
17900	ENSG00000270179	AP002840.2	sense_intronic	13.8985	-2.33711	0.631106	-3.70319	0.000212902	0.00606298	35.8838	9.69588	15.4565	18.8445	40.9648	2.94255	3.10212	6.2596	2.60154	9.90346
17101	ENSG00000183134	PTGDR2	protein_coding	29.5045	-2.33777	0.631496	-3.70195	0.000213947	0.00608076	14.1866	37.2918	51.9899	56.5334	30.7236	4.41383	1.86127	13.3016	11.7069	7.42759
2536	ENSG00000116741	RGS2	protein_coding	247.911	2.15332	0.581763	3.70137	0.000214435	0.006086	42.5599	85.0254	77.9849	133.624	36.5757	109.61	429.333	609.529	624.369	103.986
5931	ENSG00000248487	ABHD14A	protein_coding	142.542	-1.18753	0.320909	-3.70051	0.000215164	0.00609803	119.335	155.134	210.067	135.338	253.104	61.7936	80.0347	96.2413	79.3469	49.5173
27888	ENSG00000177337	DLGAP1-AS1	antisense	85.9103	-1.18376	0.320092	-3.6982	0.000217135	0.0061452	231.993	86.5171	108.195	113.067	174.1	120.645	34.7437	53.2066	50.73	59.4207
8574	ENSG00000213949	ITGA1	protein_coding	459.999	1.34681	0.364229	3.69769	0.000217566	0.00614871	141.866	477.336	243.791	388.025	171.174	698.856	1335.15	572.753	868.913	277.297
12380	ENSG00000106333	PCOLCE	protein_coding	343.373	1.91492	0.518215	3.69522	0.000219699	0.00620023	90.1268	123.809	75.8772	112.21	204.824	595.131	457.252	212.826	834.443	227.78
16788	ENSG00000173432	SAA1	protein_coding	90.5891	2.98774	0.808902	3.69358	0.000221118	0.00623149	24.2007	8.20421	0	14.5616	86.3187	203.772	67.0058	30.5155	154.141	272.345
26489	ENSG00000167536	DHRS13	protein_coding	75.7904	-1.91619	0.518875	-3.69298	0.000221644	0.00623752	178.585	73.092	99.7645	51.394	178.49	36.0462	21.7148	42.2523	35.7711	7.42759
23218	ENSG00000134138	MEIS2	protein_coding	25.5226	2.08377	0.564697	3.69007	0.000224189	0.00630027	16.6902	11.9334	4.91797	2.5697	1.46303	41.9313	31.0212	17.9963	63.7376	7.42759
22541	ENSG00000119711	ALDH6A1	protein_coding	158.905	-1.57661	0.427367	-3.68913	0.000225024	0.00631488	171.074	295.351	276.811	286.95	98.023	89.7478	52.736	106.413	92.3545	37.138
23579	ENSG00000259674	AC092868.1	processed_pseudogene	43.3048	-2.43337	0.659726	-3.68846	0.000225614	0.00632256	17.5247	125.301	57.6105	57.39	23.4085	5.8851	0.620424	25.8208	10.4061	9.90346
7772	ENSG00000248144	ADH1C	protein_coding	1312.78	-2.6979	0.731915	-3.68609	0.000227729	0.00637292	1000.57	1167.23	1452.91	901.965	967.062	30.8968	3.72254	828.615	257.552	257.49
6135	ENSG00000169855	ROBO1	protein_coding	96.6834	2.45524	0.666375	3.68448	0.000229171	0.00637758	15.8556	68.617	27.4001	81.3739	4.38909	145.656	330.686	169.792	234.789	49.5173
8218	ENSG00000151718	WWC2	protein_coding	40.8511	2.27249	0.616728	3.68475	0.000228925	0.00637758	5.84155	43.2585	15.4565	16.2748	4.38909	96.3685	189.229	50.0768	89.753	12.3793
21031	ENSG00000130787	HIP1R	protein_coding	682.271	-1.04868	0.28454	-3.68552	0.000228238	0.00637758	908.779	802.52	714.51	752.066	1170.42	422.992	543.491	461.645	338.85	309.483
29643	ENSG00000105088	OLFM2	protein_coding	21.2054	3.18116	0.86338	3.68454	0.000229115	0.00637758	0	10.4417	4.2154	5.1394	4.38909	12.5058	77.553	57.9013	107.313	2.47586
614	ENSG00000130768	SMPDL3B	protein_coding	268.118	-1.41896	0.38545	-3.6813	0.000232048	0.00643083	413.916	244.634	409.596	189.301	430.131	111.817	67.0058	206.567	115.768	141.124
1114	ENSG00000162391	FAM151A	protein_coding	194.593	-1.81701	0.493538	-3.68159	0.000231784	0.00643083	426.433	151.405	153.862	147.329	291.143	105.932	68.2466	79.8099	66.3392	4.95173
26343	ENSG00000108448	TRIM16L	protein_coding	54.2686	-1.31525	0.357224	-3.68186	0.000231543	0.00643083	119.335	40.2752	87.1183	100.218	89.2448	47.0808	17.3719	23.4735	45.5269	44.5656
21025	ENSG00000182782	HCAR2	protein_coding	8.15857	3.43993	0.934785	3.67991	0.000233315	0.00645698	0.834508	4.47502	1.40513	2.5697	0	13.9771	58.3198	14.0841	8.45499	4.95173
21604	ENSG00000204899	MZT1	protein_coding	130.739	1.19381	0.324527	3.67862	0.000234502	0.00648087	146.039	101.434	92.7388	109.641	57.0581	287.634	232.659	178.399	186.01	237.683
7081	ENSG00000272989	LINC02012	lincRNA	15.0286	-2.59416	0.705305	-3.67808	0.000235001	0.00648569	17.5247	18.6459	12.6462	38.5455	42.4278	3.67819	0.620424	9.3894	7.80461	0
22539	ENSG00000187097	ENTPD5	protein_coding	668.027	-1.30019	0.353738	-3.67558	0.000237311	0.00654044	603.349	806.25	976.568	705.811	547.173	350.164	315.796	584.49	329.745	86.6553
14307	ENSG00000120915	EPHX2	protein_coding	458.523	-1.6741	0.455603	-3.67448	0.000238335	0.00654285	539.927	594.432	790.387	408.582	387.703	265.565	53.3564	259.773	120.971	178.262
20547	ENSG00000067798	NAV3	protein_coding	4.69991	4.01357	1.0923	3.67443	0.00023838	0.00654285	1.66902	0.745837	0	0.856567	0	17.6553	17.9923	3.1298	13.0077	2.47586
28252	ENSG00000196628	TCF4	protein_coding	260.994	1.35291	0.368167	3.67473	0.000238102	0.00654285	64.2571	261.789	73.0669	167.887	105.338	299.405	473.383	255.861	420.148	168.359
1830	ENSG00000150337	FCGR1A	protein_coding	31.8804	2.1482	0.584893	3.67281	0.000239901	0.00657558	6.67606	11.9334	5.62053	12.8485	17.5564	75.035	31.0212	40.6874	57.2338	27.2345
23117	ENSG00000104059	FAM189A1	protein_coding	30.9596	-2.28796	0.623322	-3.6706	0.000241984	0.0066236	44.2289	34.3085	44.2617	55.6768	40.9648	46.3452	6.20424	5.47715	3.9023	4.95173
18724	ENSG00000138316	ADAMTS14	protein_coding	90.1558	1.98722	0.541451	3.67018	0.000242378	0.00662534	14.1866	92.4838	28.1027	41.9718	32.1866	144.921	197.915	111.108	257.552	61.8966
12654	ENSG00000240204	SMKR1	protein_coding	4.87918	5.15308	1.40441	3.66923	0.000243285	0.00664104	1.66902	0	0	0	0	5.14946	6.20424	6.2596	6.50384	44.5656
27971	ENSG00000141385	AFG3L2	protein_coding	910.351	-1.56486	0.426623	-3.66802	0.000244439	0.00666345	1501.28	900.971	1066.5	859.137	1828.79	484.785	393.969	693.251	397.385	128.745
17081	ENSG00000134827	TCN1	protein_coding	77.5162	-3.17094	0.864715	-3.66704	0.000245374	0.00667986	370.521	77.567	56.2053	443.702	36.5757	85.334	0.620424	72.7678	9.10538	7.42759
14164	ENSG00000079459	FDFT1	protein_coding	1176.3	-1.09615	0.299127	-3.6645	0.000247824	0.00673737	1543	1830.28	1774.68	1661.74	1858.05	1015.92	425.611	1060.22	647.783	1064.62
18017	ENSG00000172367	PDZD3	protein_coding	373.205	-1.27615	0.348395	-3.66294	0.00024934	0.00676939	188.599	266.264	374.468	197.867	411.111	55.9085	78.1734	327.064	128.776	84.1794
2793	ENSG00000123685	BATF3	protein_coding	15.1148	2.17191	0.593486	3.65957	0.000252636	0.00683821	5.84155	5.96669	9.13337	2.5697	2.92606	36.7819	11.788	28.1682	35.1207	12.3793
4644	ENSG00000091409	ITGA6	protein_coding	2338.9	-1.40138	0.382964	-3.65931	0.0002529	0.00683821	4756.69	4709.21	4046.08	5777.54	2086.28	2326.82	2901.1	1556.29	1255.24	789.801
10748	ENSG00000156535	CD109	protein_coding	36.0974	2.14164	0.585208	3.65961	0.000252594	0.00683821	5.84155	66.3795	7.72823	22.2707	2.92606	48.5521	132.771	49.2943	88.4522	19.8069
28455	ENSG00000198053	SIRPA	protein_coding	178.315	1.69851	0.464274	3.65843	0.000253762	0.00685225	16.6902	132.759	54.8002	109.641	68.7624	177.289	211.564	190.918	305.03	284.724
7219	ENSG00000072840	EVC	protein_coding	29.9871	2.67163	0.730419	3.65767	0.000254516	0.0068611	1.66902	23.8668	7.02567	10.2788	1.46303	56.6441	135.252	14.8665	112.516	7.42759
12449	ENSG00000128606	LRRC17	protein_coding	14.0628	2.26961	0.620608	3.65707	0.000255118	0.0068611	2.50352	8.20421	3.51283	2.5697	2.92606	19.8622	16.131	11.7367	32.5192	12.3793
30784	ENSG00000105419	MEIS3	protein_coding	56.5749	2.11295	0.577755	3.65718	0.000255006	0.0068611	13.3521	20.1376	12.6462	9.42224	26.3345	65.4718	73.8304	43.0347	128.776	32.1862
30676	ENSG00000130203	APOE	protein_coding	2519.75	1.99944	0.546838	3.65637	0.000255809	0.00687045	360.507	277.451	326.693	351.192	1120.68	2171.6	1260.08	761.324	3166.72	1406.29
2164	ENSG00000272668	AL590560.2	antisense	45.9257	-1.48763	0.407349	-3.65199	0.000260219	0.00693465	95.9684	90.9921	25.2924	31.693	80.4666	41.9313	38.4663	3.1298	18.8611	19.8069
3815	ENSG00000163013	FBXO41	protein_coding	80.7131	1.20401	0.329656	3.65232	0.000259883	0.00693465	46.7324	66.3795	49.8822	111.354	43.8909	189.059	156.347	115.803	138.532	116.366
5352	ENSG00000224272	AC131097.3	antisense	248.305	-2.39628	0.655864	-3.65363	0.000258562	0.00693465	231.993	83.5337	112.411	170.457	708.106	22.0691	31.6416	47.7294	62.4369	51.9932
11609	ENSG00000048052	HDAC9	protein_coding	41.8567	1.52619	0.417864	3.65235	0.000259849	0.00693465	15.8556	41.021	7.02567	12.8485	16.0933	36.7819	132.771	36.7751	51.3803	14.8552
15341	ENSG00000260912	AL158206.1	sense_overlapping	56.8461	-1.9041	0.521252	-3.65294	0.000259259	0.00693465	209.461	37.2918	85.7131	92.5092	64.3733	32.3681	28.5395	29.7331	18.2108	17.3311
31099	ENSG00000170909	OSCAR	protein_coding	21.026	2.05655	0.563141	3.65193	0.000260279	0.00693465	14.1866	5.96669	4.91797	6.85253	5.85212	53.7016	18.6127	22.691	39.023	27.2345
173	ENSG00000226944	AL031847.1	antisense	9.57528	-3.42663	0.938936	-3.64948	0.000262771	0.00697188	22.5317	5.22086	6.3231	5.1394	32.1866	0	1.24085	1.5649	0.650384	2.47586
6935	ENSG00000058866	DGKG	protein_coding	7.17676	3.04739	0.835055	3.64933	0.000262928	0.00697188	3.33803	3.72918	0.702567	2.5697	1.46303	18.3909	22.3353	10.9543	15.6092	17.3311
7767	ENSG00000246090	AP002026.1	antisense	18.6487	-1.78471	0.489116	-3.64885	0.000263418	0.00697188	28.3733	40.2752	40.7489	38.5455	13.1673	9.56329	7.44508	16.4314	13.0077	2.47586
9201	ENSG00000120708	TGFBI	protein_coding	2643.9	1.22177	0.334714	3.6502	0.00026204	0.00697188	2618.69	1913.07	1910.28	1864.75	1375.25	13323.9	4589.89	3790.97	3925.72	1889.08
15455	ENSG00000137094	DNAJB5	protein_coding	25.7501	2.27611	0.623732	3.64918	0.000263078	0.00697188	15.0211	13.4251	8.4308	3.42627	5.85212	40.4601	60.8015	25.0384	97.5576	9.90346
1404	ENSG00000223745	CCDC18-AS1	processed_transcript	154.414	-1.03885	0.284739	-3.64845	0.000263829	0.00697351	151.046	223.005	214.283	245.835	159.47	106.667	89.341	125.974	99.5088	59.4207
30260	ENSG00000271109	AC008555.5	lincRNA	8.99898	-2.68259	0.735526	-3.64717	0.000265144	0.00699903	25.0352	5.96669	21.077	23.1273	10.2412	8.82765	1.24085	0.78245	4.55269	0
12026	ENSG00000169902	TPST1	protein_coding	36.8133	1.91426	0.524945	3.6466	0.000265738	0.00700546	14.1866	25.3585	8.4308	25.697	8.77818	69.8856	88.7206	50.8592	130.727	9.90346
13274	ENSG00000147113	CXorf36	protein_coding	48.3548	1.61078	0.442256	3.6422	0.000270321	0.00711114	13.3521	33.5627	14.7539	44.5415	10.2412	50.759	88.7206	57.1188	128.126	24.7586
22574	ENSG00000170345	FOS	protein_coding	2805.15	2.96498	0.814092	3.64207	0.000270457	0.00711114	259.532	215.547	347.77	1320.83	226.77	986.49	3157.34	7274.44	5478.84	1594.46
29918	ENSG00000127528	KLF2	protein_coding	132.624	1.5686	0.431542	3.63487	0.000278117	0.00730294	35.8838	84.2796	23.8873	70.2385	55.5951	164.047	133.391	190.135	239.341	84.1794
17607	ENSG00000085741	WNT11	protein_coding	151.574	2.53942	0.699708	3.62925	0.000284243	0.00745403	35.0493	9.69588	44.2617	40.2586	235.548	141.978	467.179	111.89	819.484	91.607
14093	ENSG00000164822	DEFA6	protein_coding	1389.07	-8.51072	2.34817	-3.6244	0.000289634	0.00758545	701.821	993.455	229.037	940.51	42.4278	2.20691	2.48169	15.649	0	0
30474	ENSG00000128016	ZFP36	protein_coding	860.632	2.58552	0.713851	3.62194	0.000292405	0.00764801	181.923	349.797	352.688	464.259	27.7976	777.569	1714.23	1913.09	1833.43	443.18
25269	ENSG00000102970	CCL17	protein_coding	5.77806	4.3588	1.20368	3.62124	0.000293192	0.00764862	0	0	0.702567	1.71313	1.46303	11.0346	5.58381	9.3894	13.0077	9.90346
25529	ENSG00000140830	TXNL4B	protein_coding	115.3	-1.01342	0.279844	-3.62137	0.00029305	0.00764862	206.123	119.334	168.616	151.612	200.435	77.242	76.9325	107.978	86.5011	59.4207
15069	ENSG00000147724	FAM135B	protein_coding	7.65786	-3.76067	1.03937	-3.61822	0.000296633	0.00771825	7.51057	23.8668	7.02567	9.42224	5.85212	0	0	3.1298	0.650384	0
25244	ENSG00000205358	MT1H	protein_coding	482.24	-1.55937	0.430958	-3.61837	0.000296468	0.00771825	40.0564	31.3251	171.426	68.5253	152.155	4.41383	9.30636	64.9433	54.6323	66.8483
22792	ENSG00000066629	EML1	protein_coding	44.8514	1.8751	0.518662	3.61526	0.000300042	0.0077968	9.17959	31.3251	24.5898	25.697	10.2412	36.0462	143.318	55.5539	111.216	39.6138
22882	ENSG00000088808	PPP1R13B	protein_coding	255.971	-0.795244	0.220247	-3.61069	0.000305379	0.0079252	264.539	274.468	308.427	292.946	377.462	197.887	112.297	214.391	158.043	205.497
16954	ENSG00000165905	LARGE2	protein_coding	83.5357	1.91927	0.531805	3.60897	0.000307415	0.00795286	40.8909	35.8002	78.6875	109.641	8.77818	266.301	290.979	226.128	97.5576	37.138
18627	ENSG00000122870	BICC1	protein_coding	59.688	2.00089	0.554451	3.60878	0.000307637	0.00795286	36.7183	47.7336	29.5078	40.2586	0	153.013	201.017	61.0311	209.424	7.42759
22700	ENSG00000140092	FBLN5	protein_coding	96.3134	1.87951	0.520736	3.60934	0.000306975	0.00795286	13.3521	54.4461	77.2823	46.2546	4.38909	164.783	129.669	132.234	191.213	42.0897
13425	ENSG00000187601	MAGEH1	protein_coding	60.6634	1.65114	0.4583	3.60276	0.000314858	0.00811855	16.6902	49.9711	39.3437	52.2506	8.77818	93.426	94.9248	71.9854	174.303	42.0897
15911	ENSG00000204291	COL15A1	protein_coding	234.534	1.91118	0.530445	3.60296	0.000314611	0.00811855	64.2571	173.034	47.072	140.477	55.5951	254.531	1140.96	197.177	634.775	69.3242
27501	ENSG00000196169	KIF19	protein_coding	44.2749	-2.52044	0.700091	-3.60016	0.000318024	0.00818964	41.7254	29.8335	19.6719	138.764	33.6497	20.5979	1.24085	13.3016	3.25192	2.47586
5044	ENSG00000018280	SLC11A1	protein_coding	55.3079	2.66819	0.742473	3.59365	0.000326082	0.00838451	15.0211	28.3418	0.702567	23.1273	32.1866	93.426	240.724	43.8172	182.758	69.3242
15004	ENSG00000170873	MTSS1	protein_coding	125.683	-1.58546	0.441219	-3.59337	0.00032643	0.00838451	168.571	161.101	259.247	253.544	122.894	185.381	60.1811	57.9013	59.185	17.3311
21098	ENSG00000081760	AACS	protein_coding	272.892	-0.73226	0.203866	-3.59186	0.000328321	0.00842227	448.131	413.194	385.709	357.188	310.162	243.496	241.345	232.388	195.766	237.683
624	ENSG00000270605	AL353622.1	antisense	48.7123	-1.44722	0.403001	-3.5911	0.000329289	0.00843629	87.6233	69.3628	65.3387	66.8122	64.3733	49.2877	11.1676	22.691	24.0642	29.7104
3098	ENSG00000162849	KIF26B	protein_coding	27.187	3.2192	0.896645	3.59027	0.000330335	0.00845228	3.33803	15.6626	0.702567	4.28283	11.7042	79.4489	125.946	32.0804	108.614	2.47586
8898	ENSG00000237187	NR2F1-AS1	antisense	14.689	2.49691	0.6957	3.58906	0.000331869	0.00845913	5.00705	14.9167	2.81027	8.56567	0	19.1266	32.262	21.1261	57.2338	12.3793
15070	ENSG00000169436	COL22A1	protein_coding	6.66376	4.07729	1.13603	3.58906	0.000331872	0.00845913	0	0.745837	1.40513	2.5697	0	13.2415	29.1599	3.91225	42.275	0
19170	ENSG00000065621	GSTO2	protein_coding	270.354	-1.57463	0.438718	-3.58917	0.000331736	0.00845913	548.272	199.884	361.119	253.544	655.437	82.3914	56.4586	169.009	98.8584	413.469
1868	ENSG00000143382	ADAMTSL4	protein_coding	54.5107	1.55113	0.432459	3.58676	0.000334813	0.00852325	21.6972	35.8002	18.2667	19.701	5.85212	77.242	101.749	42.2523	73.4934	12.3793
16120	ENSG00000185585	OLFML2A	protein_coding	78.4946	1.47206	0.410492	3.5861	0.000335664	0.00853406	35.0493	104.417	29.5078	46.2546	23.4085	89.0122	202.258	91.5466	190.563	49.5173
12493	ENSG00000253276	CCDC71L	protein_coding	164.694	1.21776	0.339973	3.58192	0.000341072	0.00866054	132.687	122.317	137	100.218	76.0775	303.818	371.634	146.318	407.791	153.504
19718	ENSG00000178878	APOLD1	protein_coding	169.678	2.21489	0.618507	3.58103	0.000342248	0.00867939	40.0564	46.9877	60.4207	53.9637	149.229	411.957	295.322	406.092	161.295	69.3242
20356	ENSG00000240771	ARHGEF25	protein_coding	71.1576	2.04372	0.57084	3.5802	0.000343334	0.00869592	5.00705	48.4794	37.9386	34.2627	2.92606	122.116	106.713	68.0731	228.935	4.95173
23793	ENSG00000167178	ISLR2	protein_coding	4.76776	5.04614	1.41086	3.57664	0.00034804	0.00880395	0	0	0.702567	0	0	14.7128	1.86127	5.47715	23.4138	4.95173
23359	ENSG00000166963	MAP1A	protein_coding	53.0025	1.88237	0.52702	3.57173	0.000354631	0.00895937	22.5317	40.2752	11.2411	16.2748	16.0933	86.8052	140.216	40.6874	124.874	24.7586
11836	ENSG00000241127	YAE1D1	protein_coding	105.443	1.29628	0.363095	3.57009	0.000356861	0.00900432	112.659	64.142	79.39	86.5133	32.1866	242.025	254.374	100.154	221.781	113.89
28038	ENSG00000141448	GATA6	protein_coding	296.596	-1.18593	0.33244	-3.56735	0.000360605	0.00908735	509.884	297.589	412.407	431.71	485.726	191.266	214.046	349.755	120.321	126.269
19974	ENSG00000139209	SLC38A4	protein_coding	24.6069	-2.82843	0.793206	-3.56582	0.000362716	0.00912903	51.7395	44.7502	84.308	17.1313	61.4472	33.1037	26.0578	1.5649	1.95115	2.47586
22561	ENSG00000119630	PGF	protein_coding	58.8026	1.8413	0.516629	3.56408	0.000365141	0.00917852	25.0352	12.6792	10.5385	22.2707	73.1515	59.5867	81.8959	50.8592	166.498	56.9449
26254	ENSG00000011295	TTC19	protein_coding	500.801	-0.919753	0.258118	-3.56331	0.000366206	0.00919375	889.585	498.965	672.356	597.027	751.997	484.785	300.905	343.496	347.955	326.814
16408	ENSG00000107281	NPDC1	protein_coding	1961.43	-2.01166	0.565007	-3.56042	0.000370258	0.00928382	4760.87	961.384	1691.08	1331.96	8454.85	1039.46	371.634	572.753	643.88	752.663
23488	ENSG00000128872	TMOD2	protein_coding	54.0529	2.11415	0.594043	3.55891	0.00037239	0.0093256	5.00705	49.2252	15.4565	29.9798	2.92606	96.3685	182.405	32.8629	64.388	39.6138
1081	ENSG00000162383	SLC1A7	protein_coding	13.4723	3.62637	1.01922	3.55798	0.000373716	0.00934711	5.00705	2.98335	6.3231	0	0	13.9771	26.6782	7.8245	68.2903	14.8552
7849	ENSG00000138794	CASP6	protein_coding	355.416	-0.966549	0.271783	-3.55632	0.000376079	0.0093927	506.546	410.21	626.689	506.231	424.278	224.369	220.25	353.667	217.879	257.49
27846	ENSG00000158270	COLEC12	protein_coding	43.8076	1.92467	0.541239	3.55605	0.000376478	0.0093927	3.33803	20.8834	9.83593	18.8445	4.38909	75.035	37.2254	30.5155	64.388	9.90346
14212	ENSG00000156006	NAT2	protein_coding	65.5622	-1.65294	0.464964	-3.55498	0.000378009	0.00941914	138.528	94.7213	101.17	83.087	64.3733	33.8393	18.6127	74.3327	16.2596	24.7586
17252	ENSG00000171219	CDC42BPG	protein_coding	365.695	-1.13451	0.319179	-3.55448	0.000378724	0.00942523	373.025	355.764	376.576	374.32	512.06	137.564	188.609	247.254	120.971	227.78
30623	ENSG00000011422	PLAUR	protein_coding	275.878	1.62646	0.458077	3.55062	0.00038432	0.00955263	239.504	155.134	90.6311	89.083	266.271	419.313	627.248	434.26	631.523	363.952
28365	ENSG00000180011	ZADH2	protein_coding	280.836	-0.990138	0.278948	-3.54955	0.00038589	0.00957973	328.796	408.719	507.956	402.586	264.808	251.588	244.447	215.174	142.434	138.648
7248	ENSG00000163995	ABLIM2	protein_coding	103.329	1.72299	0.485801	3.54671	0.000390079	0.00967173	75.1057	25.3585	42.154	22.2707	162.396	146.392	212.185	140.059	184.059	240.159
18694	ENSG00000122862	SRGN	protein_coding	369.252	1.56443	0.441528	3.54322	0.000395279	0.00978854	86.7888	348.306	171.426	273.245	79.0036	628.235	455.391	684.644	673.798	267.393
22684	ENSG00000133943	DGLUCY	protein_coding	370.563	-1.2977	0.366379	-3.54197	0.000397157	0.0098229	522.402	667.524	620.366	548.203	324.792	99.3111	150.143	417.046	258.853	205.497
11601	ENSG00000106541	AGR2	protein_coding	8312.72	-1.43612	0.406257	-3.53501	0.000407762	0.0100727	16270.4	3523.33	7494.98	12025.3	20122.5	3929.78	2203.74	8001.33	2871.45	5256.26
28307	ENSG00000171791	BCL2	protein_coding	106.102	-1.12267	0.317751	-3.53318	0.000410594	0.0101302	88.4578	160.355	141.918	203.006	74.6145	71.3569	55.8381	61.8135	59.8353	49.5173
26198	ENSG00000263400	TMEM220-AS1	antisense	27.4777	-2.73785	0.775636	-3.52981	0.000415856	0.0102474	17.5247	17.9001	11.2411	29.9798	35.1127	0	1.24085	7.04205	8.45499	0
30973	ENSG00000129450	SIGLEC9	protein_coding	14.8638	2.16881	0.61469	3.52829	0.000418251	0.0102937	2.50352	11.9334	5.62053	9.42224	2.92606	32.3681	22.3353	22.691	29.2673	19.8069
11256	ENSG00000131016	AKAP12	protein_coding	106.314	2.16679	0.614276	3.52738	0.000419693	0.0103059	6.67606	59.6669	36.5335	37.6889	26.3345	212.599	232.038	146.318	308.282	29.7104
24688	ENSG00000166780	C16orf45	protein_coding	49.8883	1.44336	0.409193	3.52733	0.000419777	0.0103059	26.7042	43.2585	24.5898	23.9839	19.0194	123.587	57.6994	50.8592	133.329	34.6621
27675	ENSG00000173894	CBX2	protein_coding	33.2496	2.10839	0.59803	3.52555	0.000422604	0.0103626	24.2007	23.8668	11.2411	17.9879	11.7042	109.61	93.684	47.7294	24.0642	96.5587
29844	ENSG00000141854	MISP3	protein_coding	516.442	-2.04479	0.580363	-3.52329	0.000426219	0.0104385	1393.63	340.102	358.309	500.235	1638.59	230.255	136.493	154.925	172.352	190.642
6278	ENSG00000072858	SIDT1	protein_coding	240.643	-1.60766	0.456609	-3.52086	0.000430142	0.0105217	146.873	213.309	266.975	260.396	269.197	86.8052	55.2177	119.715	60.4857	34.6621
8950	ENSG00000279232	AC008522.1	antisense	376.234	-3.25279	0.924317	-3.51913	0.000432963	0.0105756	89.2923	651.861	1805.6	1851.04	27.7976	93.426	207.842	187.006	59.185	0
16719	ENSG00000072952	MRVI1	protein_coding	168.934	1.45919	0.414678	3.51886	0.000433405	0.0105756	42.5599	217.039	59.7182	122.489	64.3733	376.646	387.765	174.486	383.076	86.6553
30196	ENSG00000121297	TSHZ3	protein_coding	26.1568	2.11807	0.602064	3.51802	0.000434781	0.0105963	3.33803	21.6293	3.51283	23.1273	4.38909	37.5175	68.867	26.6033	78.6965	12.3793
6496	ENSG00000198585	NUDT16	protein_coding	547.771	-0.768276	0.218424	-3.51736	0.000435862	0.0106097	615.867	589.957	481.258	609.876	684.698	375.911	290.979	335.671	374.621	373.856
227	ENSG00000171621	SPSB1	protein_coding	139.906	1.436	0.408512	3.5152	0.000439426	0.0106835	55.912	91.7379	53.3951	77.091	84.8557	226.576	226.455	133.016	414.295	79.2277
8004	ENSG00000170153	RNF150	protein_coding	28.0029	2.74559	0.781378	3.51378	0.000441782	0.0107277	0	5.22086	7.02567	8.56567	1.46303	30.1611	33.5029	14.8665	76.0949	0
7749	ENSG00000172238	ATOH1	protein_coding	140.266	-3.66269	1.04352	-3.50993	0.000448225	0.0108709	189.433	197.647	303.509	541.35	45.3539	0	25.4374	53.989	1.95115	14.8552
5086	ENSG00000054356	PTPRN	protein_coding	14.4463	3.98292	1.13506	3.50898	0.000449831	0.0108967	5.00705	0.745837	0.702567	0	0	47.8164	16.7514	7.04205	25.365	2.47586
29159	ENSG00000130703	OSBPL2	protein_coding	577.625	0.918175	0.262281	3.50073	0.000463983	0.0112259	422.261	429.602	473.53	413.722	392.092	764.328	1142.2	483.554	777.209	940.829
7530	ENSG00000163453	IGFBP7	protein_coding	1834.96	2.01868	0.576748	3.50011	0.000465071	0.0112387	368.018	1685.59	842.377	1187.2	188.731	4239.48	3815.61	3916.94	7953.55	349.097
24761	ENSG00000166743	ACSM1	protein_coding	19.001	-2.10934	0.602719	-3.49972	0.000465756	0.0112416	13.3521	30.5793	46.3694	33.4061	26.3345	5.8851	1.24085	30.5155	6.50384	2.47586
15041	ENSG00000153317	ASAP1	protein_coding	115.283	2.28065	0.651952	3.49818	0.00046844	0.0112928	17.5247	103.671	52.6925	85.6567	4.38909	344.278	357.984	184.658	190.563	106.462
19821	ENSG00000123094	RASSF8	protein_coding	29.9367	3.02541	0.864963	3.49773	0.000469227	0.0112982	4.17254	20.1376	3.51283	16.2748	0	41.9313	163.171	27.3857	99.5088	4.95173
30568	ENSG00000086548	CEACAM6	protein_coding	4819.9	1.64725	0.471077	3.49678	0.000470917	0.0113252	3352.22	4341.52	1646.82	3247.24	2160.89	19829.1	13708.9	4095.34	5650.54	7373.12
6321	ENSG00000144843	ADPRH	protein_coding	45.9001	1.21326	0.347002	3.49642	0.000471551	0.0113269	31.7113	38.0377	22.4821	23.9839	29.2606	77.242	50.8747	70.4205	91.7042	47.0414
14219	ENSG00000104613	INTS10	protein_coding	415.279	-0.991903	0.283766	-3.4955	0.00047317	0.0113521	757.733	450.485	511.468	356.332	731.515	317.795	202.879	283.247	241.293	359
23849	ENSG00000173546	CSPG4	protein_coding	119.646	1.69567	0.485158	3.49509	0.000473908	0.0113562	40.0564	58.9211	18.9693	31.693	140.451	150.07	179.923	110.325	208.773	86.6553
8113	ENSG00000164116	GUCY1A1	protein_coding	59.3299	3.07915	0.881552	3.49288	0.00047785	0.011437	0.834508	42.5127	16.8616	11.9919	1.46303	112.553	322.62	36.7751	221.131	12.3793
31634	ENSG00000128266	GNAZ	protein_coding	20.3449	2.30116	0.659146	3.49113	0.000480989	0.0114983	4.17254	2.23751	1.40513	4.28283	4.38909	8.09201	6.20424	7.8245	18.2108	94.0829
6378	ENSG00000065534	MYLK	protein_coding	463.285	2.22014	0.636119	3.49013	0.000482786	0.0115275	20.8627	405.735	250.114	273.245	16.0933	665.752	1299.79	658.823	1339.14	96.5587
13742	ENSG00000068366	ACSL4	protein_coding	244.789	1.48804	0.426489	3.48904	0.000484758	0.0115608	106.817	321.456	95.5491	175.596	73.1515	622.349	650.824	225.346	436.408	262.442
1084	ENSG00000236723	AL606760.2	antisense	134.406	-1.73117	0.496415	-3.48735	0.000487835	0.0116203	217.807	223.005	187.585	211.572	80.4666	82.3914	61.4219	137.711	72.843	2.47586
22262	ENSG00000261208	AL365475.1	processed_pseudogene	8.46565	-3.95907	1.1354	-3.48692	0.000488611	0.011625	2.50352	25.3585	29.5078	45.398	2.92606	0	2.48169	3.1298	0	0
27527	ENSG00000109089	CDR2L	protein_coding	51.946	1.4525	0.416742	3.48537	0.000491452	0.0116787	52.574	35.0543	25.995	23.9839	30.7236	81.6558	113.538	66.5082	126.825	59.4207
31891	ENSG00000100336	APOL4	protein_coding	36.8225	2.00913	0.577027	3.48187	0.000497928	0.0118186	6.67606	41.021	11.9436	22.2707	8.77818	67.6787	27.9191	146.318	67.6399	37.138
7220	ENSG00000072832	CRMP1	protein_coding	32.7969	1.91263	0.54974	3.47916	0.000502989	0.0119245	6.67606	28.3418	9.83593	12.8485	17.5564	86.8052	62.0424	46.1645	79.9972	24.7586
1275	ENSG00000162614	NEXN	protein_coding	56.0819	2.3133	0.664988	3.47871	0.000503835	0.0119305	8.34508	29.0876	31.6155	29.9798	2.92606	102.989	147.04	83.7221	212.676	9.90346
17764	ENSG00000166025	AMOTL1	protein_coding	74.3708	2.0481	0.589163	3.4763	0.000508392	0.0120241	6.67606	63.3961	19.6719	30.8364	26.3345	78.7132	210.944	116.585	220.48	39.6138
20359	ENSG00000135454	B4GALNT1	protein_coding	17.7936	2.66269	0.766386	3.47434	0.000512108	0.0120977	1.66902	5.22086	1.40513	8.56567	10.2412	39.7244	33.5029	10.1718	45.5269	4.95173
15480	ENSG00000198467	TPM2	protein_coding	1829.76	1.87915	0.540923	3.47396	0.000512831	0.0121005	684.296	360.239	362.524	404.3	1448.4	2198.82	1753.94	1333.29	4623.58	1458.28
7611	ENSG00000163734	CXCL3	protein_coding	342.583	2.15365	0.620008	3.47358	0.000513569	0.0121037	166.067	261.043	146.836	196.154	127.284	726.81	775.53	675.254	771.356	774.946
8098	ENSG00000137462	TLR2	protein_coding	54.7318	2.11841	0.610365	3.47073	0.000519046	0.0122184	2.50352	61.9045	17.5642	25.697	5.85212	138.3	133.391	68.8556	96.9072	24.7586
23234	ENSG00000137801	THBS1	protein_coding	1058.85	1.648	0.475364	3.46682	0.000526661	0.012383	215.303	720.478	932.306	573.043	251.641	1188.79	3564.33	1037.53	2370.65	609.063
4493	ENSG00000115963	RND3	protein_coding	236.277	1.51224	0.436357	3.46561	0.000529027	0.0124241	103.479	126.792	144.729	162.748	83.3927	325.887	460.354	408.439	435.107	205.497
5301	ENSG00000233608	TWIST2	protein_coding	9.12222	3.52136	1.01628	3.46496	0.000530316	0.0124397	0	0.745837	2.81027	1.71313	0	1.47128	39.7071	7.8245	32.5192	0
5986	ENSG00000016391	CHDH	protein_coding	431.399	-1.34342	0.3878	-3.4642	0.000531802	0.0124566	544.934	442.281	961.814	783.759	740.293	146.392	450.428	271.51	370.069	155.979
27512	ENSG00000186407	CD300E	protein_coding	18.3031	3.69663	1.06717	3.46396	0.000532281	0.0124566	0	3.72918	1.40513	21.4142	0	8.82765	107.333	8.60695	71.5423	24.7586
9229	ENSG00000120738	EGR1	protein_coding	728.828	2.27206	0.656272	3.46207	0.00053603	0.0125005	189.433	155.134	334.422	424.001	219.454	384.003	1418.91	1507	1923.84	1242.88
16089	ENSG00000095303	PTGS1	protein_coding	253.982	-1.30288	0.376263	-3.46267	0.000534838	0.0125005	347.155	591.449	171.426	334.918	428.668	110.346	120.983	143.188	280.316	89.1311
27186	ENSG00000006282	SPATA20	protein_coding	618.301	-1.08113	0.312261	-3.46226	0.000535656	0.0125005	1020.6	776.416	944.249	723.799	989.008	444.325	341.233	465.558	463.724	398.614
20983	ENSG00000241388	HNF1A-AS1	processed_transcript	608.828	-2.31495	0.668947	-3.46058	0.00053901	0.0125553	351.328	219.276	288.755	262.109	989.008	55.9085	63.2832	89.1993	42.9254	106.462
10591	ENSG00000237686	AL109615.3	antisense	22.4577	2.14893	0.621143	3.45965	0.000540884	0.0125843	10.8486	13.4251	3.51283	3.42627	40.9648	44.8739	68.867	14.8665	31.8688	91.607
13839	ENSG00000122121	XPNPEP2	protein_coding	195.734	3.6156	1.04535	3.45875	0.00054268	0.0126115	4.17254	1.49167	7.02567	0	13.1673	39.7244	94.3044	12.5192	113.817	39.6138
29045	ENSG00000172216	CEBPB	protein_coding	322.188	1.61326	0.466602	3.45746	0.000545301	0.0126577	221.979	128.284	171.426	179.022	229.696	451.682	918.227	442.867	848.101	366.428
18873	ENSG00000122378	FAM213A	protein_coding	514.114	-1.09567	0.317007	-3.4563	0.000547641	0.0126973	835.342	419.16	539.571	405.156	1167.5	228.783	217.769	241.777	386.328	415.945
17540	ENSG00000054967	RELT	protein_coding	57.4925	1.24541	0.360407	3.45556	0.000549148	0.0127175	31.7113	50.7169	35.1283	31.693	40.9648	69.8856	108.574	96.2413	122.923	54.469
30331	ENSG00000011600	TYROBP	protein_coding	296.62	1.23506	0.357452	3.45518	0.000549928	0.0127208	82.6163	173.78	89.226	99.3618	143.377	265.565	163.792	309.85	373.32	277.297
9459	ENSG00000011083	SLC6A7	protein_coding	123.166	-1.60572	0.464783	-3.45477	0.00055077	0.0127256	265.373	96.213	92.0362	125.059	156.544	59.5867	37.2254	68.0731	27.9665	47.0414
2757	ENSG00000082497	SERTAD4	protein_coding	47.047	-1.83918	0.532482	-3.45398	0.000552386	0.0127335	57.581	126.792	118.734	149.899	35.1127	30.8968	16.131	51.6417	38.3727	2.47586
5394	ENSG00000071282	LMCD1	protein_coding	92.1189	1.62006	0.469008	3.45423	0.000551872	0.0127335	60.9191	43.2585	56.2053	45.398	36.5757	179.496	254.374	135.364	254.3	24.7586
8700	ENSG00000183323	CCDC125	protein_coding	207.227	-1.06046	0.307104	-3.4531	0.000554193	0.0127605	284.567	243.143	284.539	268.105	215.065	160.369	92.4431	185.441	60.4857	160.931
2668	ENSG00000133056	PIK3C2B	protein_coding	432.184	-0.747995	0.216718	-3.45147	0.000557539	0.012808	665.937	569.074	509.361	643.282	574.97	392.095	442.983	259.773	370.719	319.387
19213	ENSG00000148737	TCF7L2	protein_coding	327.954	-0.888798	0.257501	-3.45163	0.000557218	0.012808	661.765	404.989	241.683	304.081	397.944	258.944	181.164	218.304	176.254	210.448
18056	ENSG00000166250	CLMP	protein_coding	77.048	1.82076	0.527594	3.45106	0.000558385	0.0128128	16.6902	52.9544	44.9643	40.2586	11.7042	100.782	228.936	86.8519	228.285	19.8069
23170	ENSG00000166922	SCG5	protein_coding	69.6863	-1.60156	0.464616	-3.44707	0.000566712	0.0129889	168.571	114.113	80.0926	97.6486	71.6884	39.7244	47.7726	44.5996	26.6657	17.3311
14741	ENSG00000156103	MMP16	protein_coding	7.2716	3.77695	1.0964	3.44485	0.000571369	0.0130807	0	7.45837	0	0.856567	0	13.9771	34.1233	0.78245	31.2184	4.95173
5697	ENSG00000114812	VIPR1	protein_coding	593.797	-1.18358	0.343691	-3.44373	0.000573746	0.0131051	307.099	424.381	670.951	653.561	406.722	177.289	230.798	309.85	203.57	131.221
20746	ENSG00000136010	ALDH1L2	protein_coding	31.0591	2.46109	0.714614	3.44395	0.000573283	0.0131051	5.00705	43.2585	12.6462	6.85253	1.46303	45.6095	109.815	22.691	88.4522	32.1862
19644	ENSG00000110848	CD69	protein_coding	46.8764	3.31408	0.963459	3.43978	0.000582189	0.0132828	4.17254	10.4417	9.13337	14.5616	0	38.2532	50.8747	80.5923	76.0949	29.7104
775	ENSG00000116883	AL591845.1	antisense	30.7733	1.83763	0.534367	3.43888	0.000584116	0.0132881	15.8556	14.9167	14.0513	7.7091	13.1673	98.5754	29.7803	32.8629	81.298	17.3311
2885	ENSG00000143786	CNIH3	protein_coding	19.9559	2.21975	0.645558	3.4385	0.000584944	0.0132881	8.34508	8.20421	4.91797	7.7091	13.1673	62.5292	42.8092	22.691	70.8919	12.3793
3270	ENSG00000163032	VSNL1	protein_coding	123.104	1.62482	0.472553	3.43838	0.000585214	0.0132881	96.8029	55.9378	90.6311	87.3698	74.6145	205.243	328.825	189.353	453.968	198.069
17921	ENSG00000095110	NXPE1	protein_coding	438.307	-1.54178	0.448352	-3.43877	0.000584358	0.0132881	229.49	1041.19	804.439	1278	175.564	119.909	604.293	259.773	91.7042	128.745
18482	ENSG00000196693	ZNF33B	protein_coding	245.402	-0.931894	0.271047	-3.43813	0.000585743	0.0132881	278.726	373.664	484.771	394.021	258.956	213.335	210.324	161.967	171.051	178.262
24124	ENSG00000260337	AC091544.4	processed_transcript	11.8267	-3.11954	0.907689	-3.43679	0.000588648	0.0133389	14.1866	25.3585	12.6462	53.9637	4.38909	5.8851	3.10212	1.5649	1.95115	0
4133	ENSG00000115526	CHST10	protein_coding	17.3641	1.98863	0.578737	3.43615	0.000590036	0.0133552	1.66902	5.22086	7.72823	5.99597	7.31515	28.6899	17.3719	19.5612	24.7146	17.3311
31660	ENSG00000250479	CHCHD10	protein_coding	1332.34	-2.23208	0.650214	-3.43284	0.000597293	0.0135042	1495.44	299.081	311.94	324.639	3632.7	135.357	63.2832	196.395	178.856	705.621
7334	ENSG00000109819	PPARGC1A	protein_coding	125.196	-1.50725	0.43918	-3.43197	0.000599218	0.0135324	118.5	206.597	156.672	138.764	86.3187	55.1728	39.7071	61.8135	17.5604	84.1794
20867	ENSG00000111344	RASAL1	protein_coding	155.908	-2.45017	0.71402	-3.43152	0.000600204	0.0135394	429.771	196.155	147.539	212.429	629.103	178.024	3.72254	100.936	62.4369	22.2828
23607	ENSG00000171914	TLN2	protein_coding	338.482	-0.929988	0.27105	-3.43106	0.000601229	0.0135473	379.701	365.46	541.679	503.661	421.352	169.932	329.445	308.285	186.66	207.973
612	ENSG00000130775	THEMIS2	protein_coding	136.412	1.54975	0.451914	3.42931	0.00060512	0.0136097	28.3733	112.621	76.5798	77.9476	26.3345	238.347	179.302	258.208	192.514	69.3242
25434	ENSG00000103056	SMPD3	protein_coding	454.251	-1.04018	0.303329	-3.4292	0.00060536	0.0136097	323.789	425.873	366.74	356.332	457.928	129.472	243.206	251.949	184.059	128.745
18161	ENSG00000166086	JAM3	protein_coding	107.976	1.28211	0.374002	3.42808	0.000607863	0.0136475	45.8979	120.08	43.5591	71.9516	42.4278	166.254	184.886	149.448	251.699	54.469
18631	ENSG00000165449	SLC16A9	protein_coding	126.992	-1.9356	0.564672	-3.42784	0.000608404	0.0136475	331.3	94.7213	241.683	101.931	127.284	40.4601	25.4374	87.6344	35.7711	51.9932
22679	ENSG00000165914	TTC7B	protein_coding	40.2672	2.03718	0.594498	3.42673	0.000610898	0.0136881	30.0423	26.8501	5.62053	23.9839	24.8715	53.7016	85.6185	28.9506	93.6553	160.931
264	ENSG00000009724	MASP2	protein_coding	24.5143	-2.01412	0.588208	-3.42416	0.000616708	0.0137874	33.3803	27.596	45.6668	47.1112	26.3345	18.3909	9.92678	5.47715	18.8611	0
27505	ENSG00000167851	CD300A	protein_coding	101.936	1.26512	0.36947	3.42416	0.000616707	0.0137874	39.2219	60.4128	34.4258	41.9718	26.3345	95.6329	75.6917	162.75	85.8507	76.7518
16183	ENSG00000106976	DNM1	protein_coding	130.032	1.56959	0.458479	3.42347	0.000618267	0.0138068	80.1127	50.7169	28.8052	47.9677	109.727	108.874	232.038	81.3748	319.989	163.407
21402	ENSG00000183722	LHFPL6	protein_coding	87.2084	1.65883	0.484678	3.42254	0.000620386	0.0138387	25.0352	97.7046	49.1797	72.8082	10.2412	180.967	179.923	126.757	264.056	34.6621
14237	ENSG00000168476	REEP4	protein_coding	312.171	-1.16356	0.340189	-3.42033	0.000625443	0.013936	416.419	196.901	266.975	304.081	588.138	138.3	94.3044	160.402	156.743	242.635
18983	ENSG00000138193	PLCE1	protein_coding	297.742	-1.19551	0.349613	-3.41953	0.00062729	0.0139616	237	482.556	443.32	310.934	260.419	105.196	80.6551	254.296	147.637	175.786
30968	ENSG00000268906	AC011473.3	antisense	14.6655	-4.12346	1.20599	-3.41916	0.000628153	0.0139652	40.0564	0	52.6925	80.5173	14.6303	1.47128	0	12.5192	0.650384	0
5271	ENSG00000163359	COL6A3	protein_coding	1809.57	2.02956	0.594029	3.4166	0.000634078	0.0140657	332.969	2153.98	649.874	943.937	215.065	3124.99	7999.12	1970.21	6557.82	522.407
28564	ENSG00000172296	SPTLC3	protein_coding	51.0678	-2.15964	0.632061	-3.41682	0.000633565	0.0140657	28.3733	49.9711	120.139	71.095	62.9103	8.09201	3.10212	61.8135	12.3573	12.3793
488	ENSG00000007968	E2F2	protein_coding	135.955	-1.56582	0.458454	-3.41545	0.000636778	0.01411	196.109	119.334	109.6	72.8082	266.271	27.9542	31.6416	71.2029	41.6246	121.317
15803	ENSG00000106823	ECM2	protein_coding	27.6985	2.79492	0.81878	3.41352	0.0006413	0.0141787	1.66902	28.3418	3.51283	7.7091	2.92606	44.8739	97.4065	22.691	94.9561	12.3793
31934	ENSG00000100097	LGALS1	protein_coding	1944	1.73061	0.506951	3.41376	0.000640735	0.0141787	846.191	835.337	514.279	434.279	1648.83	2703.47	2374.36	2114.18	5441.76	2188.66
8050	ENSG00000280219	AC093908.1	TEC	13.5221	3.37437	0.989279	3.41093	0.000647406	0.014298	2.50352	5.22086	2.81027	1.71313	0	15.4484	125.326	3.91225	11.0565	29.7104
23237	ENSG00000150667	FSIP1	protein_coding	83.6891	1.8506	0.542616	3.41051	0.00064842	0.0143046	18.3592	52.2086	55.5028	32.5495	24.8715	59.5867	207.222	45.3821	109.915	252.538
14896	ENSG00000164933	SLC25A32	protein_coding	126.197	1.34203	0.393609	3.40955	0.000650704	0.0143391	68.4296	160.355	103.277	68.5253	49.743	203.036	277.95	252.731	177.555	168.359
26794	ENSG00000131759	RARA	protein_coding	191.767	0.967373	0.283974	3.40656	0.000657871	0.0144652	114.328	124.555	96.9542	90.7961	143.377	225.105	225.834	269.945	250.398	131.221
28488	ENSG00000132622	HSPA12B	protein_coding	38.7217	1.59576	0.468409	3.40676	0.000657396	0.0144652	9.17959	27.596	11.2411	16.2748	19.0194	52.2303	50.2543	32.8629	72.843	42.0897
6455	ENSG00000169704	GP9	protein_coding	5.03646	-5.23656	1.53756	-3.40577	0.000659786	0.0144914	13.3521	4.47502	0.702567	7.7091	7.31515	0	0	0	0	0
26717	ENSG00000275410	HNF1B	protein_coding	153.511	-1.06696	0.31333	-3.40522	0.000661104	0.0145044	251.187	186.459	187.585	214.998	216.528	158.898	95.5452	102.501	66.3392	91.607
419	ENSG00000162542	TMCO4	protein_coding	204.55	-1.01376	0.29776	-3.40462	0.000662557	0.0145045	292.912	243.143	349.878	300.655	226.77	189.795	109.815	163.532	157.393	91.607
24061	ENSG00000166821	PEX11A	protein_coding	117.975	-1.22025	0.358379	-3.4049	0.000661882	0.0145045	211.965	139.471	208.662	129.342	127.284	61.7936	78.1734	86.8519	50.73	74.2759
32142	ENSG00000077942	FBLN1	protein_coding	952.145	1.89903	0.55834	3.40121	0.00067088	0.0146706	70.9332	271.485	152.457	183.305	232.622	1081.39	526.74	366.187	1318.33	205.497
2293	ENSG00000143195	ILDR2	protein_coding	10.6406	2.55511	0.751967	3.3979	0.000679065	0.0148334	5.00705	2.98335	5.62053	1.71313	2.92606	48.5521	26.0578	19.5612	25.365	0
19471	ENSG00000130038	CRACR2A	protein_coding	164.673	-1.17663	0.346314	-3.39758	0.000679849	0.0148343	348.824	184.222	281.729	309.221	100.949	213.335	81.8959	92.3291	87.8019	79.2277
16569	ENSG00000070985	TRPM5	protein_coding	86.3475	-2.47195	0.727795	-3.3965	0.000682534	0.0148767	181.923	99.1963	32.3181	31.693	419.889	15.4484	13.6493	31.298	54.6323	7.42759
10517	ENSG00000112559	MDFI	protein_coding	118.38	2.1429	0.631081	3.3956	0.00068478	0.0148792	75.9402	27.596	13.3488	11.1354	359.905	142.714	183.025	161.967	215.277	539.738
28482	ENSG00000088836	SLC4A11	protein_coding	48.3656	2.60731	0.767726	3.39614	0.00068343	0.0148792	46.7324	15.6626	8.4308	2.5697	65.8363	77.242	209.703	133.799	88.4522	22.2828
30053	ENSG00000213996	TM6SF2	protein_coding	22.698	4.23996	1.24868	3.39556	0.000684878	0.0148792	0	0	0	0	2.92606	8.82765	2.48169	7.04205	9.75576	4.95173
28839	ENSG00000118707	TGIF2	protein_coding	138.028	1.43223	0.421847	3.39514	0.000685934	0.014886	100.975	51.4627	53.3951	57.39	137.525	113.288	323.241	118.932	245.195	346.621
19	ENSG00000237973	MTCO1P12	unprocessed_pseudogene	968.738	-1.2006	0.353711	-3.39431	0.000688029	0.0149152	619.205	1178.42	1789.44	1510.98	1031.44	497.291	276.709	676.819	599.654	579.352
22198	ENSG00000165496	RPL10L	protein_coding	11.4567	-4.10684	1.21094	-3.39146	0.000695217	0.0150548	14.1866	1.49167	9.13337	13.7051	26.3345	0	0	2.34735	0.650384	2.47586
8308	ENSG00000112877	CEP72	protein_coding	40.874	1.7166	0.506402	3.38981	0.000699424	0.0151295	10.0141	34.3085	27.4001	40.2586	11.7042	63.2648	124.705	87.6344	85.2003	42.0897
5608	ENSG00000153558	FBXL2	protein_coding	13.4868	2.07863	0.613394	3.38872	0.000702184	0.0151652	6.67606	11.1876	7.02567	5.1394	5.85212	34.575	40.948	28.9506	30.5681	14.8552
16392	ENSG00000177943	MAMDC4	protein_coding	450.603	-1.53121	0.451877	-3.38857	0.000702593	0.0151652	617.536	262.535	327.396	364.041	779.795	175.082	111.676	158.837	132.678	185.69
25868	ENSG00000159842	ABR	protein_coding	1481.16	-0.81931	0.241827	-3.388	0.000704047	0.0151802	1841.76	2162.93	2312.15	1807.36	1717.6	1243.96	1901.6	901.382	1170.69	656.104
23777	ENSG00000067141	NEO1	protein_coding	712.531	-1.22389	0.361283	-3.38763	0.000704995	0.0151843	516.56	1098.62	1284.99	1608.63	534.006	419.313	688.67	458.516	305.03	274.821
7218	ENSG00000173040	EVC2	protein_coding	10.087	2.4623	0.726993	3.38697	0.000706703	0.0151901	1.66902	5.22086	3.51283	5.1394	0	22.0691	21.0944	13.3016	31.2184	2.47586
27662	ENSG00000035862	TIMP2	protein_coding	985.132	1.80974	0.534329	3.38694	0.00070678	0.0151901	242.842	507.915	230.442	251.831	665.678	1359.46	1871.82	657.258	2360.89	297.104
3534	ENSG00000231826	LINC01819	lincRNA	117.953	-3.66458	1.08219	-3.38626	0.00070851	0.0152109	31.7113	527.307	7.72823	8.56567	937.802	237.611	4.34297	1.5649	1.30077	4.95173
2040	ENSG00000185499	MUC1	protein_coding	3933.36	-2.6028	0.769432	-3.38276	0.000717618	0.0153899	3529.13	1689.32	701.161	1242.88	14184.1	574.533	71.9691	499.203	548.274	1433.53
11112	ENSG00000118515	SGK1	protein_coding	467.555	2.42173	0.716161	3.38154	0.000720797	0.0154416	74.2712	205.105	51.9899	140.477	7.31515	440.647	434.917	458.516	482.585	103.986
5824	ENSG00000114270	COL7A1	protein_coding	556.555	1.95009	0.576748	3.38117	0.000721766	0.0154458	235.331	302.064	77.2823	214.998	514.986	336.922	2169	457.733	2170.33	408.518
21716	ENSG00000043355	ZIC2	protein_coding	7.46679	3.83722	1.13564	3.37892	0.000727714	0.0155564	1.66902	0.745837	0	0.856567	1.46303	4.41383	35.3641	1.5649	6.50384	59.4207
23817	ENSG00000178802	MPI	protein_coding	572.626	-0.791993	0.234605	-3.37586	0.00073586	0.0157138	753.56	509.407	628.797	544.777	747.608	414.164	313.314	441.302	405.84	274.821
11067	ENSG00000196569	LAMA2	protein_coding	100.596	3.13442	0.928567	3.37554	0.000736704	0.0157151	7.51057	73.8379	52.6925	53.9637	0	92.6903	202.258	488.249	205.521	51.9932
14290	ENSG00000147459	DOCK5	protein_coding	297.714	-0.937232	0.277752	-3.37434	0.00073992	0.0157668	296.25	402.006	321.073	317.786	326.256	217.749	172.478	232.388	126.175	151.028
2637	ENSG00000133048	CHI3L1	protein_coding	107.005	2.13299	0.632231	3.37375	0.000741526	0.0157842	26.7042	215.547	30.9129	35.1192	20.4824	57.3797	652.065	291.854	138.532	108.938
1623	ENSG00000116774	OLFML3	protein_coding	173.412	1.51491	0.449255	3.37206	0.000746092	0.0158646	23.3662	93.2296	92.0362	60.8162	64.3733	183.174	142.697	173.704	321.94	89.1311
20047	ENSG00000167550	RHEBL1	protein_coding	9.70407	2.24227	0.665205	3.3708	0.000749491	0.0159004	3.33803	2.98335	10.5385	2.5697	1.46303	15.4484	7.44508	21.9086	24.0642	27.2345
22357	ENSG00000100625	SIX4	protein_coding	3.54662	4.53443	1.34531	3.37056	0.000750162	0.0159004	0	1.49167	0	0	0	13.2415	16.7514	0.78245	6.50384	7.42759
29538	ENSG00000125730	C3	protein_coding	1042.06	2.10881	0.625635	3.37067	0.000749852	0.0159004	80.1127	407.973	138.406	665.552	133.136	2852.07	942.424	447.561	2351.79	138.648
26089	ENSG00000169992	NLGN2	protein_coding	74.6859	1.49504	0.443635	3.36997	0.000751776	0.0159178	43.3944	67.1253	28.1027	46.2546	16.0933	113.288	145.179	89.9817	225.683	19.8069
14914	ENSG00000154188	ANGPT1	protein_coding	12.3933	3.61957	1.07468	3.36806	0.000756993	0.0160113	0.834508	20.1376	0.702567	1.71313	0	31.6324	29.7803	14.8665	33.82	2.47586
8358	ENSG00000078295	ADCY2	protein_coding	9.63919	3.67354	1.09092	3.36738	0.00075885	0.0160336	1.66902	2.98335	0.702567	0.856567	0	18.3909	21.0944	7.04205	40.3238	0
30702	ENSG00000125740	FOSB	protein_coding	345.173	2.71095	0.805298	3.36639	0.00076158	0.0160743	16.6902	13.4251	19.6719	214.998	77.5405	30.1611	595.607	576.666	682.253	299.58
9069	ENSG00000061455	PRDM6	protein_coding	8.99828	3.08767	0.918606	3.36126	0.000775881	0.0163589	0.834508	2.98335	2.1077	0.856567	2.92606	24.276	17.9923	3.1298	46.8277	2.47586
9585	ENSG00000184347	SLIT3	protein_coding	50.7788	1.516	0.451223	3.35975	0.000780124	0.0164138	8.34508	23.8668	9.13337	26.5536	5.85212	52.9659	54.5973	18.7788	94.3057	7.42759
9598	ENSG00000145936	KCNMB1	protein_coding	38.6536	1.5907	0.47342	3.36002	0.000779369	0.0164138	9.17959	24.6126	17.5642	13.7051	11.7042	68.4143	42.8092	49.2943	88.4522	7.42759
5930	ENSG00000114779	ABHD14B	protein_coding	1174.94	-1.36215	0.405513	-3.35907	0.000782052	0.0164249	1580.56	522.086	824.111	566.191	3559.55	448.739	216.528	423.305	390.23	1029.96
29644	ENSG00000080573	COL5A3	protein_coding	112.387	1.97432	0.587773	3.35898	0.000782296	0.0164249	25.0352	99.9421	16.159	50.5374	58.5212	169.197	364.189	135.364	288.12	19.8069
10480	ENSG00000112139	MDGA1	protein_coding	17.27	2.2316	0.664812	3.35673	0.000788688	0.0165418	3.33803	2.23751	4.2154	19.701	1.46303	17.6553	41.5684	13.3016	47.478	4.95173
9055	ENSG00000113083	LOX	protein_coding	76.2366	2.27096	0.676776	3.35555	0.000792065	0.0165952	17.5247	59.6669	21.077	35.9758	11.7042	158.162	342.474	66.5082	229.586	32.1862
29082	ENSG00000064787	BCAS1	protein_coding	875.975	-1.45432	0.433453	-3.3552	0.00079309	0.0165993	850.363	984.505	1348.93	1226.6	607.157	189.059	250.651	1107.17	323.241	247.586
1565	ENSG00000064886	CHI3L2	protein_coding	22.5608	2.53251	0.754974	3.35444	0.000795268	0.0166101	3.33803	0	0	6.85253	20.4824	25.0117	9.30636	9.3894	18.2108	22.2828
2263	ENSG00000117152	RGS4	protein_coding	15.4076	3.26753	0.974015	3.3547	0.000794503	0.0166101	1.66902	1.49167	4.91797	4.28283	1.46303	2.94255	89.341	18.7788	85.8507	9.90346
17209	ENSG00000168005	SPINDOC	protein_coding	74.381	1.05608	0.315061	3.35198	0.000802355	0.0167407	68.4296	57.4294	67.4464	63.3859	43.8909	102.989	123.464	122.062	175.604	101.51
23260	ENSG00000233041	PHGR1	protein_coding	12870.5	-1.94216	0.579549	-3.35115	0.000804768	0.0167735	12373.2	4043.93	5446.3	2084.88	26793.9	1123.32	1042.93	4405.19	1625.31	6135.19
10966	ENSG00000010810	FYN	protein_coding	139.939	1.34369	0.401094	3.35006	0.000807929	0.0168044	53.4085	97.7046	56.2053	174.74	16.0933	313.382	174.959	195.612	217.879	47.0414
31684	ENSG00000128262	POM121L9P	transcribed_unprocessed_pseudogene	6.39724	3.16544	0.944816	3.35032	0.000807174	0.0168044	0	5.96669	0.702567	2.5697	0	5.14946	16.131	7.8245	29.9177	9.90346
25466	ENSG00000181019	NQO1	protein_coding	1604.07	-1.57526	0.470521	-3.3479	0.000814269	0.0169187	5363.38	2268.09	1520.35	1580.37	4576.36	1373.44	412.582	575.883	903.384	1923.75
541	ENSG00000117640	MTFR1L	protein_coding	356.753	-0.917306	0.274139	-3.34614	0.000819454	0.0169833	352.997	379.631	340.745	280.954	599.842	220.691	169.376	175.269	243.894	193.117
10970	ENSG00000112769	LAMA4	protein_coding	544.61	1.48896	0.445001	3.34598	0.000819926	0.0169833	99.3064	555.648	230.442	386.312	307.236	845.248	1578.98	624.395	1501.09	284.724
13479	ENSG00000130054	FAM155B	protein_coding	8.96155	2.45031	0.732205	3.34648	0.000818455	0.0169833	12.5176	1.49167	1.40513	2.5697	4.38909	36.0462	29.1599	5.47715	18.8611	14.8552
7341	ENSG00000153012	LGI2	protein_coding	16.3992	2.6472	0.79157	3.34425	0.000825061	0.0170394	0.834508	11.1876	9.83593	7.7091	0	42.667	24.8169	43.8172	67.6399	2.47586
9123	ENSG00000233006	MIR3936HG	processed_transcript	43.7497	-1.35259	0.404391	-3.34476	0.000823547	0.0170394	21.6972	41.021	45.6668	44.5415	39.5018	14.7128	19.2331	14.8665	8.45499	19.8069
11261	ENSG00000120262	CCDC170	protein_coding	33.9816	2.48865	0.744276	3.34372	0.000826618	0.0170394	4.17254	17.9001	0.702567	7.7091	19.0194	53.7016	44.6705	41.4698	48.1284	27.2345
19284	ENSG00000278484	AC010998.3	lincRNA	34.4398	-2.91381	0.871457	-3.3436	0.000826975	0.0170394	30.8768	0.745837	18.9693	11.1354	49.743	2.20691	0	7.04205	2.60154	0
19939	ENSG00000015153	YAF2	protein_coding	68.7104	0.929163	0.277879	3.34377	0.00082649	0.0170394	56.7465	50.7169	43.5591	56.5334	35.1127	105.932	105.472	96.2413	77.3957	76.7518
27852	ENSG00000132199	ENOSF1	protein_coding	431.16	-1.28698	0.384936	-3.34335	0.00082774	0.0170394	504.877	804.012	954.085	883.977	206.287	288.37	290.358	542.238	237.39	81.7035
20136	ENSG00000161835	GRASP	protein_coding	77.1046	1.82025	0.544499	3.34299	0.000828818	0.017044	15.8556	26.1043	3.51283	17.9879	65.8363	66.2074	76.9325	53.989	113.817	54.469
19240	ENSG00000165863	C10orf82	protein_coding	14.68	-2.66291	0.796864	-3.34174	0.000832547	0.0170888	28.3733	14.1709	85.0106	29.1233	1.46303	4.41383	3.72254	3.91225	1.95115	7.42759
27598	ENSG00000129667	RHBDF2	protein_coding	153.641	0.88198	0.263932	3.34169	0.000832703	0.0170888	116.831	131.267	90.6311	112.21	109.727	303.083	196.054	121.28	237.39	220.352
22534	ENSG00000273711	AC005520.5	antisense	10.2769	-3.22922	0.966485	-3.3412	0.000834175	0.0171014	14.1866	4.47502	4.2154	5.99597	29.2606	0.735638	1.24085	3.1298	0	0
25762	ENSG00000261327	AC134312.5	lincRNA	4.62418	5.8832	1.76222	3.33852	0.000842248	0.0172493	0	0	0.702567	0	0	9.56329	13.6493	3.1298	29.9177	0
30475	ENSG00000090924	PLEKHG2	protein_coding	157.718	1.59823	0.478779	3.33814	0.000843417	0.0172556	45.0634	88.0088	23.8873	74.5213	153.618	145.656	277.95	172.921	298.526	84.1794
26907	ENSG00000126562	WNK4	protein_coding	403.692	-1.81552	0.543918	-3.33785	0.000844293	0.0172558	737.705	364.714	800.223	728.938	586.675	406.808	173.098	167.444	87.1515	108.938
18134	ENSG00000120471	TP53AIP1	protein_coding	3.27468	-4.44176	1.33087	-3.33749	0.000845392	0.0172607	10.0141	11.1876	2.81027	4.28283	11.7042	0	0.620424	0	0	2.47586
22351	ENSG00000254718	AL157756.1	antisense	7.13634	-3.50397	1.05008	-3.33686	0.000847309	0.0172822	14.1866	5.22086	2.81027	3.42627	16.0933	1.47128	0	0.78245	0.650384	0
13023	ENSG00000243479	MNX1-AS1	lincRNA	20.3016	1.68623	0.505634	3.33489	0.00085334	0.0173521	10.8486	0.745837	8.4308	9.42224	20.4824	21.3335	16.7514	17.2139	39.6734	51.9932
20059	ENSG00000135406	PRPH	protein_coding	38.5673	3.75288	1.12516	3.33543	0.000851682	0.0173521	0	0.745837	1.40513	0	0	11.7702	0.620424	3.1298	28.6169	2.47586
23116	ENSG00000034053	APBA2	protein_coding	36.6293	1.57414	0.472018	3.33491	0.000853271	0.0173521	15.0211	17.9001	10.5385	24.8404	29.2606	41.9313	80.0347	47.7294	100.159	27.2345
13663	ENSG00000158164	TMSB15A	protein_coding	5.33128	4.22865	1.26821	3.33434	0.000855011	0.0173607	0	1.49167	4.91797	0	0	9.56329	11.788	7.8245	29.2673	2.47586
26183	ENSG00000007237	GAS7	protein_coding	118.275	1.67813	0.503311	3.33418	0.000855498	0.0173607	15.8556	88.7546	44.2617	75.3779	17.5564	120.645	136.493	139.276	357.061	34.6621
12190	ENSG00000153956	CACNA2D1	protein_coding	29.1593	1.66932	0.500984	3.33209	0.000861963	0.0174742	7.51057	25.3585	4.91797	26.5536	7.31515	33.8393	70.7283	29.7331	80.6476	9.90346
17806	ENSG00000255282	WTAPP1	transcribed_processed_pseudogene	184.207	3.50493	1.05227	3.33082	0.000865901	0.0175362	7.51057	20.8834	20.3744	65.9556	1.46303	30.8968	1700.58	84.5046	777.209	2.47586
25843	ENSG00000181031	RPH3AL	protein_coding	157.676	-1.43694	0.431601	-3.32933	0.000870562	0.0176128	274.553	96.9588	124.354	108.784	424.278	66.943	44.6705	68.8556	59.8353	106.462
22610	ENSG00000100577	GSTZ1	protein_coding	336.412	-1.6436	0.493724	-3.32899	0.000871627	0.0176165	482.345	227.48	198.124	138.764	759.312	65.4718	39.7071	112.673	109.265	403.566
28912	ENSG00000101049	SGK2	protein_coding	290.17	-1.18523	0.356267	-3.3268	0.00087848	0.0177371	351.328	217.039	225.524	130.198	474.021	172.139	90.5819	101.718	68.9407	160.931
10589	ENSG00000112715	VEGFA	protein_coding	1182.76	1.71895	0.516988	3.32493	0.000884423	0.0178212	438.117	997.184	625.987	671.548	311.625	2498.23	5468.41	1201.84	2222.36	903.691
22840	ENSG00000022976	ZNF839	protein_coding	102.109	-1.20765	0.363189	-3.32513	0.00088377	0.0178212	146.039	125.301	151.754	150.756	87.7818	58.851	73.21	109.543	80.6476	9.90346
4106	ENSG00000075568	TMEM131	protein_coding	496.983	-0.754584	0.226997	-3.3242	0.00088672	0.0178495	542.43	727.191	637.228	597.884	463.78	487.728	410.72	296.549	314.786	284.724
19321	ENSG00000189319	FAM53B	protein_coding	405.586	-0.95008	0.285983	-3.32216	0.000893232	0.0179625	477.338	305.047	360.417	290.376	751.997	164.783	183.025	226.91	245.845	274.821
17597	ENSG00000149257	SERPINH1	protein_coding	1079.29	1.14871	0.346319	3.3169	0.000910221	0.0182857	1038.96	771.195	808.654	615.872	942.191	1818.5	2508.99	1499.17	3138.1	916.07
9634	ENSG00000113739	STC2	protein_coding	73.4709	2.91956	0.880485	3.31585	0.000913641	0.0183177	119.335	12.6792	2.1077	43.6849	52.6691	75.035	287.877	228.475	198.367	64.3725
31376	ENSG00000165246	NLGN4Y	protein_coding	10.1042	2.79053	0.841536	3.31599	0.000913175	0.0183177	0.834508	0	2.81027	3.42627	1.46303	17.6553	0	13.3016	42.9254	4.95173
1420	ENSG00000224081	SLC44A3-AS1	transcribed_processed_pseudogene	150.297	-1.42224	0.429053	-3.31484	0.000916952	0.0183416	237.835	90.9921	127.867	140.477	452.076	80.9201	44.6705	64.1609	58.5346	96.5587
18088	ENSG00000154133	ROBO4	protein_coding	73.6054	1.3481	0.406708	3.31465	0.000917582	0.0183416	25.8697	61.1586	18.9693	44.5415	52.6691	77.242	102.37	112.673	156.092	56.9449
22585	ENSG00000119699	TGFB3	protein_coding	57.9822	1.79673	0.542037	3.31477	0.000917176	0.0183416	15.8556	23.1209	66.0413	43.6849	5.85212	72.0925	142.077	61.0311	261.454	14.8552
28120	ENSG00000141441	GAREM1	protein_coding	86.8037	-1.16154	0.350534	-3.31363	0.000920922	0.0183899	164.398	90.9921	99.7645	127.628	108.264	51.4946	83.1368	57.9013	47.478	32.1862
6212	ENSG00000170017	ALCAM	protein_coding	338.456	-1.15586	0.34891	-3.31276	0.000923793	0.0184289	595.839	360.239	553.622	429.997	747.608	450.21	177.441	232.388	286.819	113.89
26264	ENSG00000175061	LRRC75A-AS1	processed_transcript	4353.57	-1.59562	0.481702	-3.31247	0.000924769	0.01843	8743.14	2000.33	4693.14	2927.75	14426.9	2627.7	904.578	2976.44	1629.21	1381.53
769	ENSG00000171812	COL8A2	protein_coding	36.0112	2.87089	0.867051	3.3111	0.00092929	0.0184833	0	13.4251	16.8616	12.8485	4.38909	133.886	49.0135	23.4735	167.799	4.95173
29872	ENSG00000105137	SYDE1	protein_coding	60.9077	1.90435	0.57514	3.31111	0.000929261	0.0184833	18.3592	29.8335	14.0513	17.1313	55.5951	92.6903	109.195	74.3327	180.807	14.8552
571	ENSG00000117676	RPS6KA1	protein_coding	897.407	-1.05245	0.318025	-3.30931	0.000935249	0.0185649	1393.63	719.733	736.29	582.465	1694.19	409.015	302.146	636.914	437.058	633.821
22122	ENSG00000165410	CFL2	protein_coding	64.2706	1.27977	0.386685	3.30959	0.000934323	0.0185649	26.7042	51.4627	43.5591	55.6768	19.0194	83.8627	99.2678	71.9854	189.262	47.0414
32614	ENSG00000142156	COL6A1	protein_coding	1487.57	1.45981	0.441174	3.30892	0.000936572	0.0185727	355.5	927.075	448.94	871.985	918.782	1505.85	2420.27	1241.75	4290.58	534.787
16406	ENSG00000180539	C9orf139	antisense	17.3517	-2.2791	0.688867	-3.30848	0.000938051	0.0185836	30.8768	12.6792	10.5385	16.2748	57.0581	5.8851	3.72254	4.6947	2.60154	4.95173
17536	ENSG00000260401	AP002761.4	sense_overlapping	61.9747	-1.64471	0.497202	-3.30794	0.000939844	0.0186007	82.6163	44.7502	40.7489	52.2506	118.505	10.2989	6.20424	46.1645	24.0642	34.6621
14267	ENSG00000173530	TNFRSF10D	protein_coding	103.014	-1.6327	0.493719	-3.30695	0.000943174	0.0186298	157.722	152.897	250.114	183.305	158.007	79.4489	52.1156	100.936	53.3315	34.6621
29001	ENSG00000158296	SLC13A3	protein_coding	7.8034	3.61116	1.09194	3.3071	0.00094268	0.0186298	1.66902	1.49167	0	0	4.38909	4.41383	58.9402	3.1298	22.7634	7.42759
12260	ENSG00000127920	GNG11	protein_coding	131.888	1.23504	0.37369	3.30498	0.000949838	0.0187329	71.7677	69.3628	54.0976	73.6647	64.3733	115.495	106.092	231.605	312.184	113.89
18018	ENSG00000248712	CCDC153	protein_coding	178.877	-1.90358	0.575997	-3.30485	0.000950265	0.0187329	144.37	40.2752	85.0106	45.398	339.423	10.2989	16.131	76.6801	39.023	42.0897
3348	ENSG00000084754	HADHA	protein_coding	2085.88	-0.66552	0.201465	-3.3034	0.000955195	0.0187945	2278.21	1844.45	2473.03	1508.41	2412.54	1421.25	954.212	1517.17	1204.51	1515.23
29203	ENSG00000075043	KCNQ2	protein_coding	37.7466	5.96853	1.8068	3.30338	0.00095527	0.0187945	0	0	0	0	1.46303	0	0	95.4589	1.95115	455.559
28467	ENSG00000088881	EBF4	protein_coding	54.3534	1.46554	0.443824	3.30208	0.000959695	0.018863	10.8486	26.8501	11.9436	30.8364	29.2606	39.7244	52.1156	55.5539	99.5088	42.0897
1523	ENSG00000116337	AMPD2	protein_coding	304.442	0.625614	0.189579	3.30002	0.000966765	0.018982	289.574	257.314	261.355	250.974	273.586	423.727	382.181	420.176	470.228	363.952
22433	ENSG00000054690	PLEKHH1	protein_coding	344.45	-0.965711	0.29266	-3.29977	0.000967649	0.018982	387.212	553.411	474.232	568.76	241.4	287.634	312.073	344.278	170.401	94.0829
32417	ENSG00000159200	RCAN1	protein_coding	332.022	1.20744	0.366046	3.29861	0.000971642	0.0190417	150.211	218.53	124.354	143.047	181.416	175.082	437.399	345.06	725.829	316.911
18863	ENSG00000133678	TMEM254	protein_coding	189.84	-1.20367	0.364931	-3.29833	0.000972602	0.0190419	282.898	249.11	359.012	295.516	210.676	80.9201	105.472	166.662	142.434	111.414
16673	ENSG00000183801	OLFML1	protein_coding	37.2386	2.06756	0.626989	3.2976	0.00097515	0.0190731	1.66902	32.8168	12.6462	10.2788	8.77818	42.667	57.6994	29.7331	119.02	17.3311
16454	ENSG00000148408	CACNA1B	protein_coding	3.47984	-4.69046	1.42293	-3.29632	0.000979586	0.0191412	6.67606	0.745837	9.83593	22.2707	4.38909	0	0	0	0.650384	0
546	ENSG00000158006	PAFAH2	protein_coding	212.787	-1.06265	0.322473	-3.2953	0.00098317	0.0191924	215.303	301.318	312.642	276.671	182.879	135.357	88.7206	169.009	117.069	108.938
2788	ENSG00000065600	TMEM206	protein_coding	44.344	1.51438	0.459635	3.29475	0.000985096	0.0192113	31.7113	26.8501	44.9643	47.1112	5.85212	92.6903	70.1079	70.4205	78.0461	81.7035
12336	ENSG00000160862	AZGP1	protein_coding	295.566	1.81144	0.550847	3.28846	0.00100735	0.0196262	315.444	121.571	66.7438	52.2506	307.236	1304.29	292.22	231.605	872.165	393.662
26843	ENSG00000128422	KRT17	protein_coding	108.46	3.22442	0.980924	3.28713	0.00101215	0.0197004	14.1866	2.98335	7.72823	0.856567	902.689	32.3681	212.185	211.261	169.1	51.9932
16455	ENSG00000159247	TUBBP5	transcribed_unprocessed_pseudogene	28.2621	-2.05443	0.625127	-3.28642	0.00101469	0.0197307	80.9473	0	85.7131	49.6809	43.8909	7.35638	0	54.7715	10.4061	4.95173
24416	ENSG00000261663	AC009065.8	antisense	42.1135	-2.13703	0.650626	-3.28458	0.00102135	0.019841	52.574	20.8834	14.7539	25.697	105.338	9.56329	1.24085	11.7367	5.85346	42.0897
9052	ENSG00000184838	PRR16	protein_coding	14.8689	2.73727	0.833566	3.28381	0.00102415	0.0198761	0.834508	17.1542	4.2154	6.85253	0	8.09201	71.9691	27.3857	61.1361	2.47586
9942	ENSG00000112149	CD83	protein_coding	62.1878	1.2102	0.368571	3.28351	0.00102525	0.019878	16.6902	44.0044	47.7745	66.8122	24.8715	64.0005	102.37	115.02	130.077	44.5656
11453	ENSG00000164850	GPER1	protein_coding	77.0944	-2.24407	0.68385	-3.28153	0.00103246	0.0199942	129.349	47.7336	68.149	25.697	171.174	7.35638	11.788	43.0347	20.1619	24.7586
30431	ENSG00000196218	RYR1	protein_coding	10.9598	2.69488	0.82128	3.28132	0.00103323	0.0199942	0	2.98335	1.40513	1.71313	1.46303	13.2415	6.82466	14.0841	4.55269	7.42759
20440	ENSG00000090376	IRAK3	protein_coding	65.0292	1.73745	0.52966	3.28031	0.00103692	0.0200462	17.5247	73.092	23.1847	26.5536	5.85212	260.416	154.485	49.2943	107.313	14.8552
26056	ENSG00000161940	BCL6B	protein_coding	42.1468	1.50881	0.460128	3.2791	0.00104137	0.0201128	14.1866	41.021	9.83593	26.5536	35.1127	40.4601	98.0269	53.2066	139.182	37.138
16643	ENSG00000166313	APBB1	protein_coding	78.2896	1.1098	0.33854	3.27819	0.00104475	0.0201496	22.5317	32.071	30.2104	47.9677	38.0388	75.7707	57.079	39.1225	122.272	81.7035
30844	ENSG00000105559	PLEKHA4	protein_coding	207.218	1.28953	0.393384	3.27804	0.00104529	0.0201496	76.7747	70.1087	103.98	47.9677	296.995	158.162	133.391	216.739	306.981	656.104
1564	ENSG00000162777	DENND2D	protein_coding	317.683	-0.865214	0.264048	-3.27672	0.00105019	0.020205	484.849	320.71	382.899	407.726	419.889	302.347	130.289	273.075	170.401	259.966
19102	ENSG00000107807	TLX1	protein_coding	16.425	3.69491	1.12757	3.27687	0.00104965	0.020205	11.6831	6.71253	0	0	13.1673	5.14946	71.9691	3.91225	50.73	74.2759
14114	ENSG00000253981	ALG1L13P	transcribed_unprocessed_pseudogene	13.2108	-2.13386	0.651303	-3.27628	0.00105182	0.0202171	45.8979	15.6626	13.3488	12.8485	36.5757	13.2415	8.06551	3.91225	1.95115	0
3048	ENSG00000198626	RYR2	protein_coding	13.1033	2.57636	0.786523	3.27564	0.00105425	0.0202442	2.50352	17.9001	2.1077	0.856567	4.38909	30.1611	53.9769	6.2596	34.4704	7.42759
5762	ENSG00000163817	SLC6A20	protein_coding	95.301	5.27949	1.61191	3.2753	0.00105551	0.020249	15.8556	23.1209	0	5.1394	13.1673	8.82765	362.327	31.298	367.467	205.497
20121	ENSG00000139629	GALNT6	protein_coding	917.594	-1.45854	0.445398	-3.27469	0.00105779	0.0202733	1678.2	691.391	595.074	482.247	4930.41	612.786	269.884	263.686	258.853	1020.06
796	ENSG00000185090	MANEAL	protein_coding	55.6688	-1.37196	0.420396	-3.26349	0.00110047	0.0209708	89.2923	107.401	85.7131	66.8122	84.8557	63.2648	35.3641	71.2029	11.0565	14.8552
3185	ENSG00000176887	SOX11	protein_coding	3.9648	5.42115	1.66052	3.26473	0.00109568	0.0209708	0	0.745837	0	0	0	20.5979	16.131	3.91225	15.6092	2.47586
5321	ENSG00000172478	C2orf54	protein_coding	73.8959	2.00639	0.614773	3.26362	0.00109999	0.0209708	0.834508	7.45837	33.7232	17.1313	64.3733	5.8851	161.31	35.9927	120.971	74.2759
9096	ENSG00000245937	LINC01184	lincRNA	170.31	-0.871109	0.266889	-3.26394	0.00109874	0.0209708	252.856	197.647	257.139	228.703	244.326	141.978	121.603	147.883	99.5088	131.221
23239	ENSG00000166073	GPR176	protein_coding	39.5007	2.2539	0.69043	3.26448	0.00109664	0.0209708	3.33803	27.596	10.5385	37.6889	7.31515	59.5867	199.776	44.5996	156.092	14.8552
26942	ENSG00000175832	ETV4	protein_coding	267.432	1.39267	0.426715	3.26369	0.0010997	0.0209708	523.236	40.2752	52.6925	82.2304	586.675	844.512	298.424	203.437	172.352	1047.29
2879	ENSG00000143753	DEGS1	protein_coding	155.431	1.19237	0.365505	3.26224	0.00110534	0.0210435	80.9473	167.067	81.4977	127.628	58.5212	234.668	295.942	259.773	301.778	99.0346
5122	ENSG00000152049	KCNE4	protein_coding	22.6882	2.6105	0.800536	3.26094	0.00111043	0.0211204	1.66902	26.1043	4.91797	3.42627	8.77818	49.2877	93.0636	24.2559	80.6476	9.90346
3427	ENSG00000213626	LBH	protein_coding	282.505	1.71007	0.524562	3.25999	0.00111416	0.0211712	58.4155	238.668	168.616	190.158	55.5951	611.315	760.019	520.329	749.242	91.607
21026	ENSG00000255398	HCAR3	protein_coding	6.17845	3.38265	1.03836	3.25767	0.00112332	0.021325	0	2.23751	1.40513	3.42627	0	13.2415	40.3275	14.0841	14.9588	0
4514	ENSG00000153234	NR4A2	protein_coding	121.959	1.96096	0.602079	3.25698	0.00112603	0.0213561	54.243	35.0543	44.2617	92.5092	24.8715	70.6212	314.555	273.075	381.125	76.7518
7149	ENSG00000163945	UVSSA	protein_coding	267.276	-0.865848	0.265877	-3.25658	0.00112763	0.0213663	298.754	432.585	281.729	424.857	310.162	145.656	343.715	174.486	165.848	153.504
7658	ENSG00000251442	LINC01094	lincRNA	6.91693	2.8581	0.87783	3.25587	0.00113047	0.0213997	0	4.47502	3.51283	2.5697	0	19.8622	17.9923	10.9543	26.6657	0
11710	ENSG00000153814	JAZF1	protein_coding	40.9265	1.31941	0.405477	3.25396	0.00113809	0.0215236	11.6831	38.7835	19.6719	27.4101	10.2412	52.2303	71.3487	36.7751	72.1926	24.7586
32660	ENSG00000210194	MT-TE	Mt_tRNA	76.4049	-2.06933	0.636037	-3.25347	0.00114006	0.0215405	34.2148	109.638	68.8515	117.35	92.1708	46.3452	16.131	40.6874	14.9588	0
28236	ENSG00000141646	SMAD4	protein_coding	384.66	-0.777586	0.239205	-3.25071	0.00115118	0.0217302	408.074	396.039	467.909	527.645	535.469	361.198	282.293	282.464	218.529	225.304
1191	ENSG00000162437	RAVER2	protein_coding	388.404	-1.05637	0.325309	-3.24727	0.00116518	0.0219529	477.338	466.148	588.048	549.059	351.127	200.093	237.622	320.804	181.457	230.255
21975	ENSG00000155465	SLC7A7	protein_coding	202.183	1.73634	0.53469	3.24737	0.00116475	0.0219529	31.7113	113.367	47.072	57.39	95.0969	187.588	257.476	155.708	388.279	195.593
2110	ENSG00000143320	CRABP2	protein_coding	11.3325	2.47845	0.763574	3.24586	0.00117098	0.0220002	6.67606	4.47502	2.1077	2.5697	1.46303	7.35638	33.5029	7.8245	54.6323	17.3311
10621	ENSG00000146070	PLA2G7	protein_coding	58.4534	1.62778	0.50144	3.24621	0.00116954	0.0220002	15.0211	64.8878	29.5078	25.697	21.9454	61.0579	97.4065	97.0238	132.028	61.8966
13076	ENSG00000101825	MXRA5	protein_coding	240.501	1.72849	0.532502	3.24598	0.00117046	0.0220002	40.8909	268.501	60.4207	137.051	84.8557	451.682	897.753	147.883	812.98	81.7035
19091	ENSG00000055950	MRPL43	protein_coding	492.084	-0.798768	0.246153	-3.24501	0.00117447	0.022045	686.8	507.915	601.397	544.777	744.682	301.611	277.95	384.183	387.629	435.752
22907	ENSG00000179627	ZBTB42	protein_coding	112.776	-1.15777	0.356866	-3.24427	0.00117754	0.0220818	136.025	86.5171	120.139	95.0789	280.902	52.2303	31.0212	79.8099	65.6888	76.7518
7634	ENSG00000138755	CXCL9	protein_coding	70.1963	2.45801	0.757942	3.24301	0.00118275	0.0221252	9.17959	72.3462	12.6462	36.8324	4.38909	219.22	67.6262	142.406	261.454	24.7586
18207	ENSG00000151632	AKR1C2	protein_coding	88.7111	-1.63847	0.505247	-3.24291	0.00118316	0.0221252	121.838	62.6503	65.3387	19.701	178.49	9.56329	22.3353	46.947	18.8611	34.6621
31499	ENSG00000236499	LINC00896	lincRNA	19.218	-2.05511	0.633678	-3.24315	0.00118217	0.0221252	40.8909	30.5793	16.8616	35.9758	38.0388	3.67819	4.34297	28.1682	8.45499	4.95173
21527	ENSG00000136147	PHF11	protein_coding	205.263	0.976351	0.301145	3.24214	0.00118638	0.0221645	134.356	164.83	192.503	144.76	147.766	412.693	418.166	209.697	279.665	287.2
28282	ENSG00000074657	ZNF532	protein_coding	117.232	1.73173	0.5342	3.24172	0.0011881	0.0221761	35.8838	149.913	66.0413	98.5052	10.2412	182.438	457.873	165.879	241.293	64.3725
31659	ENSG00000169314	C22orf15	protein_coding	177.779	-3.08867	0.953151	-3.24048	0.00119327	0.0222518	180.254	23.8668	20.3744	22.2707	440.372	11.0346	4.34297	19.5612	13.0077	0
1533	ENSG00000198758	EPS8L3	protein_coding	1540.99	-0.898123	0.277512	-3.23634	0.00121072	0.0225562	2220.63	1998.1	1938.38	1871.6	1746.86	1282.22	820.2	1489	781.762	1000.25
3746	ENSG00000119865	CNRIP1	protein_coding	52.6653	1.48266	0.458169	3.23606	0.00121193	0.0225577	8.34508	40.2752	13.3488	32.5495	7.31515	41.9313	51.4952	79.8099	82.5988	14.8552
6979	ENSG00000196083	IL1RAP	protein_coding	31.7207	2.03746	0.630341	3.23231	0.00122794	0.0227866	10.0141	19.3918	22.4821	14.5616	5.85212	68.4143	114.158	51.6417	56.5834	27.2345
14059	ENSG00000223508	RPL23AP53	transcribed_processed_pseudogene	7.43354	-2.13884	0.661735	-3.23217	0.00122852	0.0227866	25.8697	14.9167	8.4308	10.2788	13.1673	3.67819	5.58381	2.34735	3.25192	0
17148	ENSG00000124939	SCGB2A1	protein_coding	22.6688	-2.88555	0.89285	-3.23185	0.00122992	0.0227866	36.7183	16.4084	66.7438	4.28283	11.7042	0	0	15.649	4.55269	4.95173
22023	ENSG00000157326	DHRS4	protein_coding	529.56	-1.40182	0.433624	-3.23281	0.0012258	0.0227866	892.089	268.501	353.391	349.479	1565.44	181.703	109.815	303.591	236.74	344.145
24456	ENSG00000103355	PRSS33	protein_coding	14.8491	3.03519	0.939146	3.23186	0.00122987	0.0227866	0.834508	5.22086	1.40513	1.71313	10.2412	62.5292	31.0212	6.2596	16.91	64.3725
11350	ENSG00000112531	QKI	protein_coding	147.176	1.33469	0.413028	3.23147	0.00123157	0.0227949	68.4296	187.951	60.4207	103.645	24.8715	266.301	326.343	179.963	299.177	47.0414
14215	ENSG00000104611	SH2D4A	protein_coding	205.074	-1.24064	0.383953	-3.23122	0.00123265	0.0227949	304.595	299.081	314.75	239.839	419.889	250.852	50.2543	201.09	86.5011	128.745
8345	ENSG00000145536	ADAMTS16	protein_coding	3.76694	5.22043	1.61581	3.23084	0.00123427	0.0228039	0	0	0	0	0	7.35638	17.3719	0	14.9588	2.47586
16588	ENSG00000223756	TSSC2	transcribed_unprocessed_pseudogene	9.32585	3.02174	0.935471	3.23018	0.0012371	0.022814	2.50352	1.49167	0	0	4.38909	8.82765	17.9923	3.91225	20.8123	2.47586
20332	ENSG00000166866	MYO1A	protein_coding	1320.71	-1.31248	0.40629	-3.2304	0.00123615	0.022814	776.092	751.058	996.239	682.684	1528.87	289.106	106.713	680.731	310.233	779.897
11950	ENSG00000170419	VSTM2A	protein_coding	15.8418	-3.39833	1.05222	-3.22969	0.00123924	0.0228324	6.67606	18.6459	18.9693	46.2546	7.31515	0.735638	0	3.91225	1.30077	2.47586
22404	ENSG00000126822	PLEKHG3	protein_coding	406.795	-1.00402	0.310987	-3.2285	0.0012444	0.0229064	514.891	470.623	711.7	582.465	514.986	367.819	304.008	322.369	173.653	235.207
8594	ENSG00000164294	GPX8	protein_coding	87.3514	1.37361	0.425591	3.22753	0.00124865	0.0229303	57.581	70.8545	50.5848	80.5173	33.6497	186.116	243.206	129.104	256.902	37.138
15057	ENSG00000008513	ST3GAL1	protein_coding	137.641	1.74014	0.539175	3.22742	0.00124914	0.0229303	15.8556	135.742	54.8002	71.095	35.1127	280.278	257.476	176.834	232.187	71.8001
26503	ENSG00000264031	ABHD15-AS1	antisense	23.9587	-3.25679	1.00906	-3.22755	0.00124856	0.0229303	35.8838	4.47502	2.1077	10.2788	58.5212	1.47128	0.620424	4.6947	2.60154	0
31693	ENSG00000100031	GGT1	protein_coding	255.17	-1.74326	0.540255	-3.22674	0.0012521	0.0229636	336.307	230.464	192.503	176.453	204.824	56.6441	50.2543	151.795	69.5911	27.2345
1286	ENSG00000162618	ADGRL4	protein_coding	71.1855	1.46465	0.454033	3.22588	0.00125588	0.0230118	21.6972	78.3129	22.4821	68.5253	27.7976	81.6558	145.8	125.192	196.416	54.469
19013	ENSG00000095585	BLNK	protein_coding	168.868	-1.39297	0.431872	-3.22542	0.00125788	0.0230273	152.715	209.58	354.796	269.819	143.377	144.921	75.0713	86.8519	103.411	54.469
11026	ENSG00000152661	GJA1	protein_coding	209.225	1.55224	0.481293	3.22514	0.00125913	0.0230292	85.9543	173.034	93.4414	155.039	83.3927	236.875	562.724	510.94	499.495	108.938
16390	ENSG00000232434	AJM1	protein_coding	190.542	-1.22851	0.381093	-3.22364	0.00126571	0.0231284	204.454	177.509	245.898	214.998	393.555	164.047	61.4219	109.543	68.9407	108.938
6191	ENSG00000181458	TMEM45A	protein_coding	38.5676	1.84665	0.572981	3.22288	0.0012691	0.0231692	4.17254	39.5294	21.7796	14.5616	8.77818	57.3797	69.4875	64.9433	134.63	9.90346
14539	ENSG00000169122	FAM110B	protein_coding	10.0903	2.7454	0.852619	3.21996	0.0012821	0.0233852	3.33803	9.69588	0.702567	0	0	17.6553	24.1965	3.1298	29.9177	4.95173
13872	ENSG00000223749	MIR503HG	lincRNA	19.5236	2.57231	0.799208	3.21858	0.00128829	0.0234578	1.66902	12.6792	2.1077	5.99597	19.0194	69.8856	32.262	7.8245	49.4292	39.6138
14664	ENSG00000091656	ZFHX4	protein_coding	5.51502	5.53614	1.72007	3.21854	0.00128843	0.0234578	0	0.745837	0	0	0	17.6553	34.1233	0	21.4627	0
26678	ENSG00000275302	CCL4	protein_coding	41.9368	2.24655	0.698158	3.21783	0.00129166	0.0234954	19.1937	9.69588	14.7539	11.9919	19.0194	40.4601	87.4797	94.6764	91.0538	39.6138
23409	ENSG00000138606	SHF	protein_coding	115.22	-1.54278	0.479553	-3.21713	0.00129481	0.0235312	295.416	55.1919	91.3337	214.142	308.699	119.909	21.0944	45.3821	53.3315	61.8966
6632	ENSG00000163754	GYG1	protein_coding	177.266	0.90165	0.280314	3.21657	0.00129734	0.0235557	161.895	171.542	178.452	125.915	90.7078	350.164	274.227	261.338	234.138	225.304
3500	ENSG00000143891	GALM	protein_coding	650.918	-0.983572	0.305935	-3.21497	0.00130457	0.0236655	574.976	372.918	532.545	391.451	980.23	278.807	111.676	298.113	344.704	490.221
30897	ENSG00000169169	CPT1C	protein_coding	19.2586	2.62997	0.818387	3.2136	0.00131082	0.0237359	5.84155	6.71253	2.1077	0	7.31515	19.1266	33.5029	13.3016	68.2903	9.90346
30966	ENSG00000167757	KLK11	protein_coding	102.28	-3.04506	0.947507	-3.21376	0.0013101	0.0237359	318.782	29.8335	205.852	289.52	340.886	154.484	0	125.192	6.50384	9.90346
20988	ENSG00000135124	P2RX4	protein_coding	712.775	-1.19425	0.371878	-3.21141	0.00132087	0.0238962	654.254	410.956	443.32	373.463	1126.53	219.956	136.493	314.545	245.195	408.518
24775	ENSG00000175311	ANKS4B	protein_coding	617.097	-0.879208	0.274157	-3.20695	0.00134151	0.0242477	578.314	414.685	469.314	391.451	1054.84	231.726	223.353	302.808	343.403	423.373
112	ENSG00000142609	CFAP74	protein_coding	4.3546	4.91342	1.5327	3.20572	0.00134725	0.0243295	0	0	0	0	1.46303	1.47128	11.788	1.5649	38.3727	9.90346
11589	ENSG00000106511	MEOX2	protein_coding	7.21279	3.83852	1.19878	3.20202	0.0013647	0.0246223	0	5.22086	0.702567	0	0	5.8851	26.0578	0	35.7711	4.95173
6919	ENSG00000187068	C3orf70	protein_coding	50.5481	-1.66518	0.520121	-3.20152	0.00136704	0.0246424	49.236	105.163	77.2823	106.214	46.8169	27.9542	56.4586	22.691	27.9665	4.95173
26295	ENSG00000141026	MED9	protein_coding	143.873	-0.965194	0.301581	-3.20045	0.00137216	0.0247124	221.979	108.146	141.918	123.346	295.532	78.7132	70.7283	86.8519	81.9484	121.317
29238	ENSG00000171703	TCEA2	protein_coding	97.2877	1.44912	0.452925	3.19947	0.00137679	0.0247735	18.3592	32.071	31.6155	29.9798	70.2254	49.2877	75.6917	44.5996	135.93	257.49
21747	ENSG00000233532	LINC00460	lincRNA	7.81941	4.44906	1.39124	3.1979	0.0013843	0.0248864	0.834508	0.745837	0	0	5.85212	77.242	11.788	4.6947	13.6581	2.47586
4942	ENSG00000163600	ICOS	protein_coding	12.7231	2.21425	0.692679	3.19664	0.00139038	0.0249061	6.67606	8.95004	2.1077	6.85253	1.46303	16.184	18.6127	23.4735	22.1131	22.2828
10912	ENSG00000081087	OSTM1	protein_coding	139.135	0.93016	0.290961	3.19685	0.00138936	0.0249061	80.1127	149.913	92.0362	88.2264	62.9103	169.932	238.863	172.921	193.814	113.89
13896	ENSG00000129680	MAP7D3	protein_coding	36.9869	1.51046	0.472503	3.19673	0.00138996	0.0249061	15.0211	45.496	11.2411	18.8445	14.6303	42.667	47.7726	53.989	61.1361	71.8001
28016	ENSG00000266554	LINC01443	lincRNA	6.2428	-4.3147	1.34949	-3.19728	0.00138732	0.0249061	8.34508	14.9167	2.1077	26.5536	0	2.20691	0	0	0.650384	0
11466	ENSG00000236081	ELFN1-AS1	lincRNA	48.3896	2.47832	0.775519	3.1957	0.00139493	0.0249653	10.0141	0	21.077	2.5697	115.579	5.8851	64.5241	62.596	63.0873	304.531
5150	ENSG00000115009	CCL20	protein_coding	672.041	1.78718	0.559439	3.1946	0.00140026	0.0249958	329.631	407.973	155.97	228.703	217.991	2409.95	1201.76	344.278	1265.65	643.725
7467	ENSG00000109182	CWH43	protein_coding	96.7521	-2.84287	0.889907	-3.19457	0.00140038	0.0249958	129.349	188.697	147.539	69.3819	71.6884	8.09201	1.24085	50.0768	6.50384	39.6138
19307	ENSG00000196177	ACADSB	protein_coding	142.42	-1.438	0.450092	-3.1949	0.00139881	0.0249958	142.701	289.385	293.673	317.786	89.2448	103.725	119.121	69.638	68.2903	59.4207
14352	ENSG00000157110	RBPMS	protein_coding	218.104	1.10609	0.346327	3.19378	0.00140424	0.0250424	137.694	165.576	106.088	96.7921	201.898	322.945	320.759	304.373	426.652	158.455
2511	ENSG00000143341	HMCN1	protein_coding	34.4843	2.78868	0.873241	3.19348	0.00140568	0.0250457	0.834508	14.1709	9.13337	22.2707	0	82.3914	135.873	19.5612	136.581	7.42759
16680	ENSG00000166402	TUB	protein_coding	15.6153	2.55448	0.800537	3.19096	0.00141802	0.025243	0	15.6626	2.81027	10.2788	0	25.0117	27.9191	14.8665	42.9254	7.42759
4271	ENSG00000115008	IL1A	protein_coding	6.20673	3.06518	0.96115	3.18908	0.00142729	0.0253629	1.66902	1.49167	2.1077	0.856567	4.38909	6.62074	29.1599	25.0384	10.4061	9.90346
20254	ENSG00000135424	ITGA7	protein_coding	95.6602	1.23987	0.388764	3.18927	0.00142634	0.0253629	36.7183	60.4128	44.2617	49.6809	54.1321	107.403	158.208	61.8135	248.447	66.8483
13617	ENSG00000186310	NAP1L3	protein_coding	5.59347	4.11876	1.29209	3.18767	0.00143424	0.0254639	0	0.745837	0.702567	0.856567	0	17.6553	6.82466	3.1298	29.2673	2.47586
7904	ENSG00000172403	SYNPO2	protein_coding	194.021	1.73046	0.542974	3.187	0.00143758	0.025478	16.6902	153.642	97.6568	83.9436	23.4085	292.048	313.934	173.704	478.032	39.6138
25378	ENSG00000176387	HSD11B2	protein_coding	1572.05	-1.50019	0.470703	-3.18712	0.00143699	0.025478	2463.47	1389.49	1359.47	1406.48	1634.2	207.45	579.476	676.819	526.811	1346.87
21674	ENSG00000134874	DZIP1	protein_coding	28.9108	1.9237	0.603716	3.18643	0.00144038	0.0255049	6.67606	14.1709	14.7539	23.9839	4.38909	53.7016	87.4797	32.0804	96.9072	7.42759
18029	ENSG00000263873	AP003396.5	sense_intronic	233.956	2.68468	0.842773	3.18553	0.00144488	0.025562	24.2007	144.692	50.5848	104.501	79.0036	620.143	678.123	283.247	1223.37	0
4397	ENSG00000072135	PTPN18	protein_coding	1357.8	-1.19527	0.375514	-3.18303	0.00145745	0.0257615	1728.27	1151.57	847.998	1116.11	3310.84	877.616	362.948	555.539	723.878	792.277
20341	ENSG00000185633	NDUFA4L2	protein_coding	70.9078	1.53081	0.48102	3.18243	0.00146043	0.0257915	35.8838	41.021	9.13337	29.1233	77.5405	89.0122	81.2755	84.5046	159.994	106.462
19406	ENSG00000127884	ECHS1	protein_coding	2183.23	-1.25214	0.393534	-3.1818	0.00146364	0.0258254	3490.75	1008.37	1388.97	959.355	4561.73	863.639	368.532	755.064	745.991	2129.24
11121	ENSG00000118513	MYB	protein_coding	637.656	-1.05752	0.332591	-3.17965	0.00147451	0.0259896	1080.69	815.946	1204.9	1058.72	977.304	399.451	816.478	428	400.637	492.697
32579	ENSG00000175894	TSPEAR	protein_coding	7.11096	3.7538	1.18064	3.17945	0.00147555	0.0259896	0	0.745837	0.702567	5.99597	0	9.56329	12.4085	31.298	33.82	0
17599	ENSG00000171533	MAP6	protein_coding	6.30289	2.5988	0.817785	3.17785	0.00148371	0.0261104	1.66902	2.23751	1.40513	1.71313	0	10.2989	9.30636	5.47715	12.3573	4.95173
5105	ENSG00000114923	SLC4A3	protein_coding	9.58965	2.59122	0.816168	3.17486	0.0014991	0.026358	2.50352	6.71253	0.702567	0.856567	1.46303	13.2415	17.3719	11.7367	20.8123	7.42759
10629	ENSG00000153294	ADGRF4	protein_coding	19.066	2.43454	0.767162	3.17344	0.00150646	0.0264642	10.8486	2.98335	9.83593	5.1394	5.85212	54.4372	63.2832	35.9927	43.5757	12.3793
11512	ENSG00000011275	RNF216	protein_coding	243.375	0.932484	0.294174	3.16984	0.00152524	0.0267707	208.627	177.509	211.473	214.142	111.19	297.198	623.526	252.731	418.847	247.586
348	ENSG00000142632	ARHGEF19	protein_coding	104.88	-1.00476	0.317069	-3.16891	0.00153014	0.0268331	140.197	117.842	132.083	202.15	169.711	70.6212	43.4297	76.6801	124.223	74.2759
3268	ENSG00000197872	FAM49A	protein_coding	45.2751	1.51037	0.476758	3.168	0.00153489	0.0268929	12.5176	36.546	13.3488	35.1192	5.85212	59.5867	50.8747	39.9049	83.2492	34.6621
20255	ENSG00000258311	AC009779.3	protein_coding	13.5937	-1.65355	0.52201	-3.16766	0.00153669	0.0269009	18.3592	26.8501	21.7796	22.2707	10.2412	6.62074	4.96339	10.1718	5.20307	4.95173
1285	ENSG00000137965	IFI44	protein_coding	107.937	1.73879	0.549155	3.16631	0.00154386	0.0270027	35.0493	106.655	44.9643	75.3779	27.7976	94.1616	248.169	314.545	309.583	49.5173
21843	ENSG00000244306	AL589743.1	transcribed_processed_pseudogene	4.44276	4.46967	1.412	3.16549	0.00154823	0.0270554	0	0	0	0	1.46303	3.67819	5.58381	0.78245	46.1773	4.95173
17136	ENSG00000124920	MYRF	protein_coding	91.1786	-1.99843	0.631476	-3.1647	0.00155241	0.0271049	136.025	151.405	193.908	93.3658	147.766	16.184	8.68593	158.055	24.7146	39.6138
20677	ENSG00000166130	IKBIP	protein_coding	59.2388	1.41466	0.447065	3.16434	0.00155435	0.027115	20.8627	90.9921	39.3437	50.5374	13.1673	77.242	127.187	108.761	173.002	39.6138
7884	ENSG00000145349	CAMK2D	protein_coding	382.55	-0.955483	0.302017	-3.16367	0.00155795	0.0271182	392.219	482.556	518.494	509.657	345.275	221.427	207.842	362.274	222.431	168.359
14608	ENSG00000165084	C8orf34	protein_coding	4.72878	4.11096	1.29969	3.16304	0.0015613	0.0271182	0	0.745837	0	0	0	5.14946	5.58381	0.78245	6.50384	4.95173
14657	ENSG00000137558	PI15	protein_coding	31.9937	6.14968	1.94407	3.16329	0.00155995	0.0271182	0	0	0	0.856567	8.77818	11.7702	218.389	15.649	121.622	2.47586
20246	ENSG00000135447	PPP1R1A	protein_coding	9.52925	3.44102	1.08787	3.16307	0.00156114	0.0271182	0.834508	1.49167	0	2.5697	0	7.35638	0.620424	27.3857	11.7069	9.90346
30148	ENSG00000267934	AC010300.1	antisense	76.9635	-2.44876	0.774087	-3.16342	0.00155925	0.0271182	119.335	4.47502	21.7796	22.2707	86.3187	5.8851	3.10212	2.34735	4.55269	37.138
18026	ENSG00000245248	USP2-AS1	antisense	4.99077	3.35956	1.06222	3.16277	0.00156273	0.0271195	1.66902	1.49167	0.702567	0	0	0.735638	8.68593	11.7367	7.80461	24.7586
18067	ENSG00000110002	VWA5A	protein_coding	419.53	-1.24233	0.392889	-3.16203	0.00156674	0.0271654	418.088	687.662	824.813	776.906	272.123	375.911	212.185	338.018	311.534	91.607
24371	ENSG00000099769	IGFALS	protein_coding	12.2128	-2.89521	0.915951	-3.16088	0.00157295	0.0272496	38.3874	6.71253	11.2411	11.1354	27.7976	0	1.24085	3.91225	2.60154	9.90346
908	ENSG00000066056	TIE1	protein_coding	61.813	1.62748	0.514996	3.16017	0.00157675	0.027268	15.8556	55.1919	25.995	37.6889	13.1673	94.8973	116.019	90.7642	187.311	12.3793
16317	ENSG00000225756	DBH-AS1	antisense	10.5319	3.29742	1.04338	3.16031	0.001576	0.027268	0	2.98335	0.702567	5.1394	0	25.0117	3.10212	10.1718	19.5115	2.47586
6186	ENSG00000168386	FILIP1L	protein_coding	251.285	2.4668	0.780778	3.15941	0.00158087	0.0273158	11.6831	255.076	101.17	131.055	7.31515	579.682	830.747	405.309	781.762	54.469
3201	ENSG00000236008	LINC01814	lincRNA	22.6793	-1.51405	0.479366	-3.15844	0.00158618	0.0273838	25.0352	44.0044	56.2053	62.5294	20.4824	11.7702	21.7148	8.60695	13.6581	17.3311
5093	ENSG00000072195	SPEG	protein_coding	67.5161	2.00877	0.63621	3.1574	0.00159185	0.0274037	15.0211	6.71253	25.2924	7.7091	54.1321	79.4489	63.9036	43.0347	194.465	17.3311
6149	ENSG00000044524	EPHA3	protein_coding	31.5107	2.96175	0.938085	3.15723	0.00159274	0.0274037	0	17.1542	8.4308	13.7051	0	49.2877	86.8593	18.7788	102.11	7.42759
16473	ENSG00000185885	IFITM1	protein_coding	802.035	1.71968	0.544566	3.1579	0.00158913	0.0274037	711.001	735.395	416.622	741.787	128.747	1997.99	2571.66	1235.49	1287.11	965.587
29659	ENSG00000090339	ICAM1	protein_coding	276.661	1.96293	0.621726	3.15722	0.00159281	0.0274037	80.1127	131.267	49.1797	117.35	206.287	394.302	627.869	359.927	655.587	34.6621
15466	ENSG00000198722	UNC13B	protein_coding	584.312	-1.06128	0.336324	-3.15552	0.00160213	0.0275404	664.268	823.404	1095.3	1047.58	460.854	339.129	209.703	816.878	447.464	240.159
15397	ENSG00000086061	DNAJA1	protein_coding	1083.33	0.861678	0.273362	3.15215	0.00162071	0.0278359	916.289	1002.4	970.244	1020.17	677.383	1769.21	2245.31	1709.65	1386.62	1341.92
2241	ENSG00000225217	HSPA7	unprocessed_pseudogene	56.3557	1.93416	0.61392	3.15051	0.00162983	0.0279552	5.00705	58.1753	7.72823	50.5374	4.38909	133.15	36.605	34.4278	156.092	14.8552
19343	ENSG00000089876	DHX32	protein_coding	413.251	-0.889735	0.282419	-3.1504	0.00163045	0.0279552	595.004	413.939	592.264	536.211	531.08	330.301	297.183	311.415	364.215	170.835
17629	ENSG00000149260	CAPN5	protein_coding	1214.11	-0.762236	0.24198	-3.14999	0.00163275	0.0279706	1221.72	1394.71	1211.22	1293.42	1407.43	643.683	639.657	853.653	1075.74	663.532
7306	ENSG00000137440	FGFBP1	protein_coding	131.292	-1.88716	0.599216	-3.14939	0.00163614	0.0279807	409.743	157.372	102.575	95.9355	377.462	54.4372	17.9923	101.718	50.73	101.51
9194	ENSG00000249082	C5orf66-AS1	lincRNA	40.0468	-3.10222	0.984997	-3.14947	0.00163565	0.0279807	6.67606	5.96669	2.1077	6.85253	49.743	0	0.620424	4.6947	0.650384	4.95173
14194	ENSG00000104219	ZDHHC2	protein_coding	132.977	-1.43376	0.455374	-3.14854	0.00164088	0.0280183	151.88	271.485	270.488	311.79	79.0036	127.265	49.6339	174.486	93.6553	14.8552
20844	ENSG00000111275	ALDH2	protein_coding	1375.71	-0.973486	0.30924	-3.148	0.00164393	0.0280183	3076	1698.27	1499.28	1276.28	2222.34	1296.19	666.335	1451.44	715.423	908.642
25532	ENSG00000260252	AC009087.1	antisense	34.6214	-2.42021	0.768729	-3.14833	0.00164207	0.0280183	81.7818	21.6293	15.4565	16.2748	122.894	13.2415	4.34297	10.9543	8.45499	0
26085	ENSG00000174292	TNK1	protein_coding	121.809	-0.903102	0.286869	-3.14814	0.00164314	0.0280183	168.571	136.488	186.883	127.628	155.081	104.461	74.4508	120.497	67.6399	56.9449
7938	ENSG00000170917	NUDT6	protein_coding	49.5126	-1.25563	0.399067	-3.14642	0.00165282	0.0281458	68.4296	61.1586	74.4721	80.5173	73.1515	30.1611	24.8169	50.0768	40.3238	7.42759
14190	ENSG00000104723	TUSC3	protein_coding	65.5506	1.36504	0.433903	3.14596	0.00165545	0.0281523	19.1937	58.9211	46.3694	54.8203	14.6303	77.242	103.611	105.631	184.059	29.7104
18665	ENSG00000108176	DNAJC12	protein_coding	57.2647	-2.06417	0.656157	-3.14586	0.00165602	0.0281523	177.75	49.2252	103.98	161.035	55.5951	8.09201	22.9557	50.0768	25.365	22.2828
19006	ENSG00000138185	ENTPD1	protein_coding	274.582	1.21617	0.387193	3.14099	0.00168379	0.0286	77.6092	253.585	106.088	135.338	144.84	253.059	386.524	288.724	494.292	170.835
4520	ENSG00000123612	ACVR1C	protein_coding	46.8927	-2.04754	0.652174	-3.13955	0.00169205	0.0286918	49.236	103.671	94.1439	131.911	14.6303	24.276	17.9923	30.5155	5.20307	12.3793
24074	ENSG00000259291	ZNF710-AS1	antisense	102.801	-1.22997	0.391757	-3.13963	0.00169162	0.0286918	186.93	132.759	134.893	161.035	108.264	61.7936	88.1002	90.7642	95.6065	7.42759
7388	ENSG00000109790	KLHL5	protein_coding	77.1952	2.07616	0.66172	3.13752	0.00170386	0.0288354	9.17959	102.925	21.7796	40.2586	8.77818	123.587	263.68	128.322	206.172	17.3311
26369	ENSG00000166482	MFAP4	protein_coding	387.721	1.50824	0.480718	3.13747	0.00170411	0.0288354	34.2148	232.701	233.955	236.412	39.5018	347.221	481.449	385.748	987.283	71.8001
28619	ENSG00000132669	RIN2	protein_coding	234.674	1.38823	0.442485	3.13735	0.00170484	0.0288354	67.5951	186.459	194.611	149.043	71.6884	261.887	511.85	292.636	544.371	173.311
25220	ENSG00000198848	CES1	protein_coding	46.8667	1.79347	0.571822	3.13641	0.0017103	0.0289032	10.0141	36.546	23.1847	17.1313	2.92606	79.4489	31.0212	83.7221	85.2003	9.90346
30467	ENSG00000128011	LRFN1	protein_coding	7.13011	3.02042	0.963153	3.13598	0.00171283	0.0289216	0.834508	0	0.702567	0.856567	1.46303	0.735638	3.72254	10.9543	11.0565	4.95173
20399	ENSG00000177990	DPY19L2	protein_coding	4.70091	3.45724	1.1028	3.13495	0.00171881	0.028998	0.834508	2.23751	1.40513	0	0	12.5058	15.5106	4.6947	14.3085	2.47586
14929	ENSG00000164794	KCNV1	protein_coding	11.4545	-3.87794	1.23724	-3.13435	0.00172237	0.0290095	16.6902	22.3751	47.072	18.8445	23.4085	0.735638	1.24085	20.3437	0	0
24883	ENSG00000246465	AC138904.1	lincRNA	9.62578	2.73028	0.871086	3.13434	0.00172239	0.0290095	0.834508	0.745837	3.51283	1.71313	5.85212	0	4.96339	34.4278	37.0719	24.7586
6620	ENSG00000152952	PLOD2	protein_coding	366.951	1.71991	0.548781	3.13405	0.00172412	0.0290142	119.335	349.797	240.278	205.576	76.0775	598.073	641.518	478.859	678.351	433.276
7977	ENSG00000151012	SLC7A11	protein_coding	69.9012	1.34637	0.429818	3.13241	0.00173379	0.0291307	82.6163	46.2419	21.077	56.5334	43.8909	209.657	258.096	80.5923	94.9561	37.138
31227	ENSG00000198046	ZNF667	protein_coding	4.74676	3.20837	1.02426	3.13238	0.00173395	0.0291307	0.834508	2.23751	0.702567	0.856567	0	5.8851	14.2697	4.6947	19.5115	2.47586
19171	ENSG00000148841	ITPRIP	protein_coding	97.4753	1.37507	0.439181	3.131	0.00174214	0.0292437	75.1057	66.3795	75.8772	52.2506	40.9648	117.702	296.563	126.757	312.184	51.9932
20062	ENSG00000178401	DNAJC22	protein_coding	221.934	-0.870513	0.278174	-3.12938	0.00175175	0.0293803	251.187	272.976	285.945	246.691	282.365	153.013	132.15	203.437	81.9484	190.642
25857	ENSG00000167695	FAM57A	protein_coding	144.864	-0.850549	0.271829	-3.12899	0.00175411	0.0293953	379.701	141.709	176.344	205.576	232.622	123.587	106.092	100.936	148.938	121.317
4343	ENSG00000074047	GLI2	protein_coding	21.6497	2.91015	0.930367	3.12796	0.00176026	0.0294738	0	13.4251	0.702567	12.8485	2.92606	55.9085	65.7649	34.4278	91.0538	2.47586
9380	ENSG00000187678	SPRY4	protein_coding	158.094	1.7679	0.565524	3.12612	0.00177127	0.0295869	92.6304	180.493	71.6618	90.7961	26.3345	440.647	248.79	327.064	340.151	94.0829
26752	ENSG00000263818	AC091178.1	transcribed_processed_pseudogene	15.3373	1.94908	0.623488	3.12609	0.00177146	0.0295869	3.33803	7.45837	6.3231	11.9919	1.46303	30.1611	31.6416	19.5612	37.7223	0
32154	ENSG00000197182	MIRLET7BHG	lincRNA	73.8439	-1.95286	0.62466	-3.12628	0.00177033	0.0295869	71.7677	48.4794	22.4821	40.2586	231.159	12.5058	10.5472	15.649	13.0077	61.8966
25459	ENSG00000157315	TMED6	protein_coding	13.9659	-2.12471	0.67974	-3.12577	0.00177341	0.0295948	23.3662	14.1709	33.0206	10.2788	16.0933	2.20691	4.34297	12.5192	5.20307	2.47586
30725	ENSG00000170608	FOXA3	protein_coding	751.619	-1.56488	0.500715	-3.12529	0.00177628	0.029618	1047.31	202.122	434.186	346.91	2144.8	158.898	81.8959	309.068	224.383	505.076
26683	ENSG00000276085	CCL3L1	protein_coding	24.5038	1.68871	0.540439	3.1247	0.00177987	0.0296531	2.50352	9.69588	5.62053	2.5697	32.1866	2.94255	16.131	50.0768	25.365	61.8966
16570	ENSG00000230483	AC124057.1	antisense	49.5952	-3.04443	0.974451	-3.12425	0.00178258	0.0296736	89.2923	16.4084	9.83593	3.42627	308.699	4.41383	3.72254	4.6947	23.4138	0
30845	ENSG00000087074	PPP1R15A	protein_coding	560.478	1.38353	0.443006	3.12306	0.00178979	0.0297689	352.162	181.984	278.919	304.081	320.403	395.037	1012.53	728.461	1384.02	591.732
21707	ENSG00000169508	GPR183	protein_coding	86.0104	2.11182	0.676446	3.12193	0.00179667	0.0298585	1.66902	96.9588	25.2924	46.2546	13.1673	96.3685	121.603	148.665	186.66	66.8483
579	ENSG00000142751	GPN2	protein_coding	272.218	-0.909407	0.291352	-3.12133	0.00180037	0.0298951	343.817	211.072	295.781	226.99	460.854	181.703	140.216	122.062	148.938	205.497
627	ENSG00000130772	MED18	protein_coding	290.191	-1.34596	0.431403	-3.11996	0.00180877	0.02996	341.314	143.201	184.072	145.616	684.698	94.8973	59.5607	124.41	84.5499	180.738
689	ENSG00000160051	IQCC	protein_coding	74.1408	-1.41279	0.452776	-3.12028	0.0018068	0.02996	77.6092	38.7835	66.0413	70.2385	194.583	22.0691	34.1233	14.0841	26.6657	59.4207
29954	ENSG00000099330	OCEL1	protein_coding	193.753	-1.49014	0.477591	-3.12011	0.00180783	0.02996	408.074	116.351	109.6	114.78	362.831	88.2765	31.6416	71.2029	106.663	96.5587
19394	ENSG00000151650	VENTX	protein_coding	35.927	-2.40923	0.772501	-3.11874	0.00181629	0.03001	212.799	25.3585	49.8822	51.394	21.9454	37.5175	6.82466	4.6947	18.2108	4.95173
21132	ENSG00000111450	STX2	protein_coding	61.7696	1.49145	0.478151	3.1192	0.00181341	0.03001	11.6831	61.9045	37.9386	52.2506	19.0194	137.564	172.478	75.8976	109.915	44.5656
29199	ENSG00000275620	AL121827.2	antisense	4.26956	5.01325	1.60735	3.11896	0.00181488	0.03001	0	0	0.702567	0	0	16.9197	9.30636	1.5649	33.1696	0
30773	ENSG00000130751	NPAS1	protein_coding	16.837	-2.62785	0.84268	-3.11844	0.00181812	0.0300154	21.6972	4.47502	13.3488	7.7091	70.2254	0.735638	2.48169	1.5649	2.60154	12.3793
25274	ENSG00000135736	CCDC102A	protein_coding	36.01	1.50565	0.482932	3.11772	0.00182259	0.0300644	18.3592	16.4084	7.02567	35.1192	27.7976	44.8739	36.605	68.8556	91.0538	37.138
665	ENSG00000168528	SERINC2	protein_coding	2233.29	-1.36322	0.437462	-3.1162	0.00183199	0.0300954	3387.27	1376.07	1734.64	910.531	6099.37	701.063	830.127	1186.19	645.831	1339.44
1017	ENSG00000186564	FOXD2	protein_coding	123.47	-1.61909	0.519512	-3.11656	0.00182975	0.0300954	164.398	150.659	179.857	93.3658	238.474	26.483	92.4431	45.3821	59.8353	79.2277
9385	ENSG00000145819	ARHGAP26	protein_coding	367.312	-0.950123	0.30484	-3.11679	0.0018283	0.0300954	753.56	484.794	491.797	574.756	487.189	478.9	361.707	262.903	188.611	225.304
18117	ENSG00000150455	TIRAP	protein_coding	42.3055	-1.04221	0.334433	-3.11635	0.00183104	0.0300954	48.4014	90.9921	51.9899	56.5334	29.2606	31.6324	31.6416	25.8208	28.6169	14.8552
19397	ENSG00000151651	ADAM8	protein_coding	105.785	1.266	0.406149	3.11708	0.00182654	0.0300954	35.8838	98.4505	39.3437	79.6607	55.5951	175.082	165.033	131.452	199.018	69.3242
14224	ENSG00000061337	LZTS1	protein_coding	18.1443	3.04451	0.977286	3.11527	0.00183774	0.0301652	1.66902	17.1542	2.1077	0.856567	5.85212	43.4026	50.8747	28.1682	98.8584	9.90346
25171	ENSG00000167207	NOD2	protein_coding	28.3959	2.03941	0.654859	3.11427	0.00184399	0.030243	1.66902	35.8002	11.2411	12.8485	4.38909	133.886	51.4952	25.8208	40.9742	22.2828
11667	ENSG00000050344	NFE2L3	protein_coding	371.053	1.25413	0.402795	3.11358	0.00184833	0.0302894	307.933	280.435	322.478	231.273	194.583	1010.77	1457.38	383.4	452.667	425.849
13763	ENSG00000102024	PLS3	protein_coding	443.039	1.30892	0.420429	3.11329	0.00185012	0.0302938	214.468	402.752	458.776	322.926	179.953	930.582	1215.41	732.373	976.227	341.669
14315	ENSG00000168078	PBK	protein_coding	87.4852	-1.30499	0.419216	-3.11294	0.00185236	0.0303058	164.398	114.859	201.637	122.489	71.6884	38.9888	29.1599	93.894	33.1696	101.51
11863	ENSG00000002746	HECW1	protein_coding	4.18299	3.3553	1.07865	3.11065	0.00186675	0.0305162	1.66902	1.49167	0	0.856567	0	10.2989	12.4085	5.47715	11.0565	2.47586
25183	ENSG00000103460	TOX3	protein_coding	209.537	1.65975	0.533648	3.11019	0.00186964	0.0305324	60.0846	143.947	141.918	180.736	39.5018	1103.46	430.574	165.879	341.452	148.552
26193	ENSG00000133028	SCO1	protein_coding	307.725	-0.766253	0.246383	-3.11001	0.00187079	0.0305324	438.951	343.831	423.648	351.192	327.719	174.346	206.601	247.254	200.969	289.676
6300	ENSG00000172020	GAP43	protein_coding	7.44014	4.32445	1.39104	3.10879	0.00187855	0.0306121	1.66902	0	0	0	0	11.0346	2.48169	1.5649	17.5604	4.95173
20734	ENSG00000120820	GLT8D2	protein_coding	62.1734	2.02017	0.649832	3.10876	0.00187874	0.0306121	17.5247	49.9711	51.2874	59.9597	1.46303	105.196	147.04	111.108	195.766	27.2345
21881	ENSG00000165795	NDRG2	protein_coding	758.853	-1.15952	0.373032	-3.10835	0.00188133	0.0306294	625.046	842.796	1192.96	914.813	822.222	602.487	184.266	467.905	463.073	272.345
17620	ENSG00000137507	LRRC32	protein_coding	186.451	1.37947	0.44386	3.1079	0.00188424	0.0306518	79.2782	97.7046	106.088	93.3658	190.194	358.256	193.572	149.448	867.612	205.497
6322	ENSG00000144837	PLA1A	protein_coding	19.0738	2.42978	0.781931	3.1074	0.00188739	0.0306782	2.50352	26.8501	5.62053	17.9879	0	82.3914	13.0289	32.0804	75.4446	9.90346
19035	ENSG00000165886	UBTD1	protein_coding	33.404	1.81223	0.583741	3.10451	0.00190595	0.0309295	23.3662	26.8501	7.72823	5.1394	14.6303	47.0808	73.8304	28.1682	102.761	44.5656
25957	ENSG00000074370	ATP2A3	protein_coding	3148.54	-1.66758	0.537145	-3.10452	0.00190585	0.0309295	2709.65	2197.98	1804.19	2056.62	7904.75	1019.59	513.09	1342.68	771.356	522.407
23369	ENSG00000223572	CKMT1A	protein_coding	212.213	-2.07962	0.669945	-3.10417	0.00190813	0.0309398	308.768	101.434	155.267	53.1071	523.764	66.2074	3.10212	98.5887	6.50384	292.152
14188	ENSG00000164741	DLC1	protein_coding	77.6403	1.71506	0.552977	3.10151	0.00192536	0.031194	21.6972	73.8379	24.5898	53.1071	14.6303	85.334	170.617	134.581	201.619	29.7104
13877	ENSG00000184785	SMIM10	protein_coding	14.8205	2.29919	0.741392	3.10119	0.00192747	0.0312017	0	13.4251	12.6462	9.42224	0	29.4255	22.9557	21.9086	43.5757	17.3311
28973	ENSG00000101457	DNTTIP1	protein_coding	314.706	1.27396	0.410827	3.10096	0.00192896	0.0312017	252.021	129.776	233.252	268.962	228.233	435.498	743.888	224.563	679.001	693.242
12228	ENSG00000058091	CDK14	protein_coding	34.0033	2.10039	0.677636	3.09959	0.00193787	0.0313205	3.33803	50.7169	1.40513	17.1313	11.7042	80.9201	124.705	16.4314	96.2568	14.8552
7324	ENSG00000145147	SLIT2	protein_coding	30.992	2.19036	0.706789	3.09903	0.00194156	0.0313296	8.34508	7.45837	2.81027	32.5495	2.92606	97.1042	47.1522	18.7788	90.4034	4.95173
14431	ENSG00000176907	TCIM	protein_coding	375.758	2.27166	0.732987	3.09918	0.0019406	0.0313296	163.564	112.621	82.9029	191.014	58.5212	295.726	487.033	1523.43	641.279	180.738
7738	ENSG00000251095	AC097478.1	antisense	22.3469	-2.89763	0.935358	-3.09788	0.00194908	0.0314004	51.7395	3.72918	54.8002	88.2264	32.1866	66.2074	4.96339	2.34735	9.10538	0
14518	ENSG00000164736	SOX17	protein_coding	10.6961	2.00697	0.64783	3.09799	0.00194835	0.0314004	1.66902	5.22086	1.40513	8.56567	4.38909	14.7128	16.131	13.3016	26.6657	9.90346
19586	ENSG00000171860	C3AR1	protein_coding	87.9785	1.54818	0.499792	3.09764	0.00195068	0.0314008	13.3521	73.8379	49.8822	30.8364	14.6303	189.795	69.4875	107.196	152.19	34.6621
24760	ENSG00000005187	ACSM3	protein_coding	235.707	-1.56743	0.506157	-3.09673	0.00195665	0.0314716	306.264	409.464	571.187	356.332	169.711	177.289	77.553	230.04	174.953	9.90346
22024	ENSG00000187630	DHRS4L2	protein_coding	519.811	-1.75682	0.567451	-3.09599	0.00196155	0.0314997	810.307	176.763	205.149	233.843	1442.55	102.254	46.5318	187.006	129.426	413.469
23937	ENSG00000103888	CEMIP	protein_coding	500.228	-1.41414	0.456741	-3.09616	0.00196046	0.0314997	1337.72	1532.69	875.398	867.702	534.006	971.042	463.456	350.538	393.482	121.317
21829	ENSG00000283199	C13orf46	protein_coding	9.15327	-3.07849	0.99475	-3.09473	0.0019699	0.0316084	12.5176	11.1876	23.1847	4.28283	46.8169	0	9.30636	1.5649	1.95115	0
1152	ENSG00000232453	AC105277.1	lincRNA	15.5838	-1.92591	0.622411	-3.09428	0.0019729	0.0316312	22.5317	19.3918	24.5898	26.5536	32.1866	2.94255	16.7514	1.5649	7.80461	12.3793
5179	ENSG00000204128	C2orf72	protein_coding	239.641	-1.49716	0.483949	-3.09363	0.00197722	0.031675	200.282	313.251	296.483	274.958	229.696	91.2191	21.7148	273.857	74.1438	84.1794
11602	ENSG00000173467	AGR3	protein_coding	503.602	-2.04499	0.661104	-3.0933	0.00197947	0.0316858	882.075	400.514	746.126	597.027	633.492	225.841	4.34297	576.666	91.0538	180.738
8852	ENSG00000131730	CKMT2	protein_coding	40.1721	3.05434	0.987529	3.09291	0.00198206	0.0316875	5.00705	8.95004	17.5642	2.5697	5.85212	2.94255	4.34297	221.433	15.6092	309.483
23377	ENSG00000184716	SERINC4	protein_coding	115.094	-1.80382	0.583233	-3.0928	0.00198274	0.0316875	121.004	276.705	210.77	256.97	96.5599	115.495	72.5896	61.8135	80.6476	0
22377	ENSG00000126785	RHOJ	protein_coding	49.2377	1.48639	0.480729	3.09195	0.00198844	0.0317531	10.0141	57.4294	22.4821	24.8404	8.77818	50.0234	111.056	50.8592	135.28	12.3793
8517	ENSG00000112936	C7	protein_coding	107.243	2.41008	0.779772	3.09075	0.00199649	0.0318563	4.17254	2.98335	11.9436	6.85253	7.31515	47.0808	18.6127	31.298	245.195	2.47586
13736	ENSG00000197565	COL4A6	protein_coding	19.9975	-3.16678	1.02478	-3.09021	0.00200012	0.0318888	22.5317	61.9045	23.8873	51.394	5.85212	0.735638	0	11.7367	5.85346	0
31366	ENSG00000224060	ARSEP1	transcribed_unprocessed_pseudogene	3.98076	-4.0985	1.32675	-3.08913	0.00200747	0.0319804	5.84155	0.745837	2.81027	4.28283	16.0933	0	0	0.78245	0	0
4055	ENSG00000115042	FAHD2A	protein_coding	191.792	-0.775411	0.251088	-3.0882	0.00201372	0.0320545	275.388	153.642	218.498	210.715	296.995	128.737	77.553	166.662	162.596	143.6
16318	ENSG00000123453	SARDH	protein_coding	13.6425	1.78012	0.576475	3.08793	0.00201555	0.0320582	5.00705	2.98335	4.91797	8.56567	4.38909	23.5404	11.788	14.8665	21.4627	14.8552
19465	ENSG00000011105	TSPAN9	protein_coding	174.403	1.03944	0.336682	3.0873	0.00201984	0.0321008	127.68	126.046	98.3593	104.501	112.653	184.645	259.958	210.479	403.889	151.028
11252	ENSG00000120254	MTHFD1L	protein_coding	178.739	1.15502	0.37423	3.0864	0.00202599	0.0321659	244.511	69.3628	79.39	111.354	272.123	245.703	298.424	315.327	216.578	529.835
17628	ENSG00000198488	B3GNT6	protein_coding	132.708	-4.29705	1.39233	-3.08623	0.00202715	0.0321659	13.3521	246.126	370.253	719.516	11.7042	2.20691	3.72254	59.4662	23.4138	0
25242	ENSG00000198417	MT1F	protein_coding	394.773	-1.28705	0.417355	-3.08382	0.00204361	0.0324013	75.1057	59.6669	505.848	148.186	266.271	17.6553	37.2254	134.581	103.411	121.317
21024	ENSG00000256249	AC026333.3	lincRNA	5.37739	3.7919	1.22977	3.08342	0.00204634	0.0324191	0	1.49167	0	2.5697	1.46303	14.7128	32.262	14.8665	10.4061	0
4354	ENSG00000136732	GYPC	protein_coding	134.729	1.42395	0.462086	3.08157	0.0020591	0.0325696	25.0352	80.5504	30.2104	34.2627	38.0388	122.116	86.2389	82.1572	175.604	89.1311
19012	ENSG00000229417	NPM1P25	processed_pseudogene	14.0594	-2.31408	0.750938	-3.08158	0.00205903	0.0325696	15.8556	12.6792	38.6412	29.1233	10.2412	12.5058	5.58381	2.34735	7.15423	0
686	ENSG00000084652	TXLNA	protein_coding	591.663	-0.767909	0.249316	-3.08007	0.00206954	0.0326926	786.941	619.045	595.074	576.469	1231.87	422.992	410.1	387.313	483.235	450.607
8654	ENSG00000164197	RNF180	protein_coding	7.07479	2.59537	0.842724	3.07974	0.00207178	0.0326926	2.50352	2.23751	1.40513	0	2.92606	11.0346	19.8536	5.47715	16.2596	2.47586
22642	ENSG00000185070	FLRT2	protein_coding	30.6666	2.11201	0.685747	3.07986	0.00207096	0.0326926	0.834508	14.1709	8.4308	17.9879	7.31515	61.0579	62.0424	23.4735	103.411	7.42759
3460	ENSG00000152689	RASGRP3	protein_coding	80.7329	1.55521	0.505035	3.07942	0.00207404	0.0327025	6.67606	85.7712	17.5642	48.8243	35.1127	83.8627	145.8	75.1152	137.881	29.7104
21146	ENSG00000198598	MMP17	protein_coding	36.5041	1.99576	0.648381	3.07807	0.00208346	0.0328252	9.17959	4.47502	2.1077	5.1394	49.743	26.483	25.4374	28.9506	55.2826	24.7586
4465	ENSG00000075884	ARHGAP15	protein_coding	58.3003	1.50149	0.48792	3.07732	0.0020887	0.0328819	17.5247	47.7336	20.3744	24.8404	7.31515	70.6212	25.4374	82.1572	74.1438	64.3725
6406	ENSG00000189366	ALG1L	protein_coding	53.8721	-2.36728	0.769661	-3.07574	0.00209978	0.0330302	223.648	31.3251	37.9386	49.6809	288.217	37.5175	4.96339	33.6453	29.2673	9.90346
7739	ENSG00000145335	SNCA	protein_coding	14.2542	2.87332	0.935003	3.07306	0.00211876	0.0333026	0	11.1876	2.1077	1.71313	2.92606	63.2648	10.5472	13.3016	33.1696	2.47586
1831	ENSG00000203814	HIST2H2BF	protein_coding	9.34499	2.40301	0.782614	3.07049	0.00213709	0.0335381	5.00705	8.20421	2.1077	2.5697	0	7.35638	19.8536	11.7367	15.6092	56.9449
27668	ENSG00000171302	CANT1	protein_coding	1236.08	-0.86447	0.28153	-3.07061	0.00213619	0.0335381	1997.81	1275.38	1677.73	1552.1	1423.53	1078.44	704.801	1355.99	493.642	849.222
10229	ENSG00000196260	SFTA2	protein_coding	7.04786	3.19811	1.0417	3.07009	0.00213996	0.0335477	3.33803	0	0	0.856567	5.85212	7.35638	2.48169	8.60695	7.80461	66.8483
17561	ENSG00000149380	P4HA3	protein_coding	24.631	2.3749	0.773599	3.06993	0.00214106	0.0335477	2.50352	19.3918	24.5898	12.8485	0	37.5175	76.3121	25.8208	132.028	9.90346
21179	ENSG00000176894	PXMP2	protein_coding	119.642	-1.5458	0.503679	-3.06902	0.00214762	0.0336242	131.852	51.4627	61.1233	47.1112	194.583	14.7128	23.5761	42.2523	27.9665	69.3242
18544	ENSG00000204174	NPY4R	protein_coding	27.9994	-2.19102	0.714251	-3.06758	0.00215802	0.0337343	13.3521	25.3585	16.159	11.1354	29.2606	3.67819	3.10212	3.91225	5.20307	2.47586
28403	ENSG00000226742	HSBP1L1	protein_coding	252.155	-1.10511	0.360236	-3.06775	0.00215674	0.0337343	278.726	241.651	385.006	280.954	384.777	183.174	130.909	164.314	119.671	113.89
25182	ENSG00000279427	AC007490.1	TEC	14.9396	3.35733	1.095	3.06605	0.00216906	0.0338803	2.50352	3.72918	6.3231	8.56567	0	125.794	11.1676	6.2596	22.7634	19.8069
31377	ENSG00000176728	TTTY14	lincRNA	40.2081	-2.09338	0.683069	-3.06467	0.00217914	0.0340112	46.7324	0	66.7438	40.2586	98.023	19.1266	0	30.5155	3.9023	4.95173
27228	ENSG00000214226	C17orf67	protein_coding	13.6564	1.55771	0.508378	3.06407	0.00218347	0.0340522	13.3521	11.9334	4.2154	5.99597	5.85212	20.5979	25.4374	25.0384	18.8611	27.2345
14332	ENSG00000197892	KIF13B	protein_coding	554.19	-0.875672	0.285934	-3.0625	0.00219496	0.0342048	665.103	654.845	673.059	587.605	514.986	478.164	266.782	559.452	321.29	170.835
29490	ENSG00000223573	TINCR	protein_coding	38.6184	-2.67585	0.874	-3.06161	0.00220151	0.0342801	25.8697	5.96669	28.1027	9.42224	36.5757	0	0	11.7367	3.9023	17.3311
626	ENSG00000130766	SESN2	protein_coding	275.485	-1.05589	0.345174	-3.059	0.00222077	0.0343479	274.553	172.288	154.565	212.429	488.652	106.667	91.8227	133.016	94.3057	160.931
3369	ENSG00000138080	EMILIN1	protein_coding	835.441	1.39116	0.454786	3.05893	0.00222131	0.0343479	228.655	377.393	251.519	348.623	580.823	742.994	813.375	833.309	1772.3	376.331
11579	ENSG00000146530	VWDE	protein_coding	6.73101	2.95302	0.965057	3.05995	0.00221374	0.0343479	1.66902	0	0	3.42627	1.46303	29.4255	0.620424	13.3016	10.4061	2.47586
13878	ENSG00000212747	RTL8B	protein_coding	15.2462	1.79953	0.588165	3.05957	0.00221658	0.0343479	2.50352	11.1876	2.81027	16.2748	7.31515	23.5404	43.4297	17.2139	44.8765	7.42759
14820	ENSG00000180543	TSPYL5	protein_coding	18.8686	1.87604	0.613035	3.06025	0.00221153	0.0343479	9.17959	16.4084	7.72823	11.9919	1.46303	33.1037	44.0501	21.9086	65.0384	4.95173
16475	ENSG00000142089	IFITM3	protein_coding	2825.55	1.03054	0.336779	3.06	0.00221336	0.0343479	3251.24	1719.15	1157.13	2309.3	3604.9	4561.69	5433.67	3445.91	4730.24	5409.76
25352	ENSG00000172824	CES4A	protein_coding	39.1092	-1.46567	0.478856	-3.06078	0.00220763	0.0343479	60.0846	67.8712	30.9129	61.6728	58.5212	18.3909	69.4875	2.34735	18.8611	24.7586
29198	ENSG00000101198	NKAIN4	protein_coding	3.47286	4.26247	1.39323	3.05941	0.00221775	0.0343479	0	0	0	0	1.46303	8.82765	1.24085	1.5649	20.8123	2.47586
29609	ENSG00000142303	ADAMTS10	protein_coding	55.2768	1.89064	0.618065	3.05896	0.00222109	0.0343479	0.834508	38.0377	23.1847	41.1152	14.6303	75.035	89.9614	51.6417	157.393	19.8069
632	ENSG00000200087	SNORA73B	snoRNA	51.7694	3.23371	1.05738	3.05824	0.00222641	0.0344002	0	0.745837	4.2154	1.71313	1.46303	4.41383	4.34297	3.91225	3.25192	730.38
14485	ENSG00000224594	RPL29P19	processed_pseudogene	25.0038	-2.91463	0.953905	-3.05548	0.00224703	0.0346653	35.8838	8.20421	7.02567	5.1394	108.264	0.735638	1.24085	3.1298	7.15423	7.42759
15838	ENSG00000231806	PCAT7	antisense	213.781	-1.28824	0.421589	-3.05567	0.00224558	0.0346653	441.455	144.692	266.975	143.047	512.06	184.645	67.0058	116.585	176.904	59.4207
780	ENSG00000119535	CSF3R	protein_coding	81.0349	1.97545	0.646686	3.05473	0.00225261	0.0347245	13.3521	53.7003	18.2667	173.027	5.85212	84.5983	174.959	212.044	129.426	74.2759
13365	ENSG00000102001	CACNA1F	protein_coding	23.18	-1.40441	0.460041	-3.0528	0.00226714	0.0349216	23.3662	15.6626	13.3488	21.4142	36.5757	9.56329	5.58381	4.6947	10.4061	9.90346
5129	ENSG00000135919	SERPINE2	protein_coding	249.212	1.48265	0.485872	3.05152	0.00227684	0.035044	347.155	114.859	128.57	68.5253	235.548	851.868	477.106	363.057	688.106	165.883
20104	ENSG00000185432	METTL7A	protein_coding	737.75	-1.17208	0.384176	-3.05089	0.00228166	0.0350913	490.691	665.286	808.654	580.752	634.955	321.474	94.9248	471.035	362.914	232.731
13749	ENSG00000077274	CAPN6	protein_coding	27.2689	2.39822	0.786259	3.05016	0.00228716	0.0351489	5.84155	41.7669	8.4308	7.7091	0	179.496	24.1965	25.0384	38.3727	2.47586
3394	ENSG00000115226	FNDC4	protein_coding	13.3538	1.77866	0.583397	3.0488	0.00229758	0.0352818	5.00705	7.45837	4.91797	7.7091	5.85212	25.7473	32.262	5.47715	46.8277	12.3793
9392	ENSG00000183775	KCTD16	protein_coding	8.32665	-4.0663	1.33444	-3.04719	0.00230988	0.0354435	6.67606	2.98335	33.0206	65.0991	1.46303	1.47128	0.620424	0	0	7.42759
4577	ENSG00000169507	SLC38A11	protein_coding	36.2857	3.12655	1.02623	3.04663	0.00231422	0.0354469	0	2.23751	5.62053	3.42627	1.46303	8.82765	8.06551	392.79	8.45499	0
5294	ENSG00000232306	AC012485.2	lincRNA	4.65144	-3.98922	1.30927	-3.0469	0.00231213	0.0354469	3.33803	8.20421	6.3231	5.1394	5.85212	0	0	3.1298	0	0
9872	ENSG00000124785	NRN1	protein_coding	27.5126	2.10541	0.691121	3.04636	0.00231628	0.0354469	40.8909	8.20421	2.81027	8.56567	2.92606	130.208	6.82466	16.4314	29.2673	47.0414
16331	ENSG00000085265	FCN1	protein_coding	29.0917	1.71777	0.563898	3.04625	0.00231718	0.0354469	1.66902	6.71253	5.62053	54.8203	8.77818	34.575	22.9557	25.0384	66.9896	17.3311
27108	ENSG00000242207	HOXB-AS4	antisense	85.8194	-1.58587	0.5211	-3.04331	0.00233992	0.0357673	67.5951	88.0088	103.98	93.3658	174.1	41.9313	26.0578	22.691	20.8123	64.3725
2493	ENSG00000198860	TSEN15	protein_coding	143.715	0.974755	0.320489	3.04146	0.00235432	0.0359601	178.585	124.555	106.088	133.624	70.2254	228.783	169.996	286.377	229.586	237.683
14318	ENSG00000134014	ELP3	protein_coding	202.671	-0.951247	0.312865	-3.04044	0.00236231	0.0360545	312.94	176.018	254.329	169.6	305.773	152.277	95.5452	146.318	112.516	113.89
12690	ENSG00000221866	PLXNA4	protein_coding	8.86549	2.28075	0.750424	3.03929	0.0023714	0.0361656	3.33803	5.22086	3.51283	2.5697	1.46303	23.5404	20.474	3.91225	35.7711	7.42759
25753	ENSG00000103257	SLC7A5	protein_coding	316.504	1.66059	0.546633	3.03784	0.00238277	0.0363114	519.898	184.222	68.8515	146.473	339.423	381.06	1011.91	754.282	303.079	663.532
30223	ENSG00000130881	LRP3	protein_coding	121.43	1.3617	0.44848	3.03627	0.00239526	0.036474	131.018	61.1586	79.39	61.6728	80.4666	74.2994	279.811	225.346	215.928	250.062
16048	ENSG00000182752	PAPPA	protein_coding	25.3454	2.70424	0.890893	3.03542	0.00240198	0.0365223	2.50352	23.1209	1.40513	11.1354	1.46303	13.9771	173.098	15.649	56.5834	7.42759
27771	ENSG00000197063	MAFG	protein_coding	224.414	1.08861	0.358636	3.03541	0.00240209	0.0365223	159.391	198.393	207.96	184.162	81.9296	336.922	480.208	245.689	431.855	247.586
28209	ENSG00000184828	ZBTB7C	protein_coding	264.617	-2.15649	0.710589	-3.03479	0.00240704	0.0365699	445.627	217.039	195.314	286.093	538.395	165.518	1.24085	119.715	54.6323	94.0829
28086	ENSG00000265369	PCAT18	lincRNA	4.48093	-3.52438	1.16142	-3.03455	0.00240895	0.036571	1.66902	8.20421	2.1077	6.85253	13.1673	0	0	0.78245	1.30077	0
10337	ENSG00000204301	NOTCH4	protein_coding	71.4735	1.28681	0.424653	3.03026	0.00244346	0.0370388	29.2078	111.13	23.8873	70.2385	24.8715	116.966	163.792	73.5503	205.521	49.5173
22747	ENSG00000165959	CLMN	protein_coding	444.744	-1.03111	0.340251	-3.03043	0.00244202	0.0370388	426.433	685.424	604.207	691.249	346.738	239.818	302.146	394.355	196.416	210.448
4651	ENSG00000091436	MAP3K20	protein_coding	299.457	1.38462	0.457009	3.02975	0.00244754	0.0370684	121.004	189.443	337.232	350.336	92.1708	439.911	834.47	528.936	673.798	284.724
6768	ENSG00000114200	BCHE	protein_coding	9.32617	4.44156	1.46608	3.02956	0.00244912	0.0370684	0	0	0	0	0	1.47128	1.86127	3.91225	18.2108	0
7133	ENSG00000145214	DGKQ	protein_coding	441.754	-0.81138	0.267918	-3.02846	0.00245801	0.0371748	705.159	513.882	462.289	529.358	662.752	422.992	395.21	357.58	286.169	215.4
13342	ENSG00000102109	PCSK1N	protein_coding	462.397	2.43615	0.804557	3.02793	0.00246231	0.0372118	6.67606	2.98335	6.3231	5.99597	11.7042	79.4489	14.8902	36.7751	19.5115	14.8552
18976	ENSG00000186188	FFAR4	protein_coding	198.296	-2.13882	0.706681	-3.02657	0.00247348	0.0373524	491.525	176.763	208.662	245.835	386.24	11.0346	11.788	209.697	114.468	96.5587
27115	ENSG00000229637	PRAC2	protein_coding	45.1973	-3.57887	1.18264	-3.02617	0.0024767	0.0373728	38.3874	0	51.9899	11.1354	109.727	2.20691	0	24.2559	0	4.95173
2599	ENSG00000163431	LMOD1	protein_coding	209.078	1.38626	0.458725	3.02197	0.00251131	0.0378665	32.5458	90.2463	92.0362	78.8042	71.6884	178.76	175.58	142.406	552.826	74.2759
23619	ENSG00000074410	CA12	protein_coding	1075.56	-1.45314	0.480902	-3.02169	0.00251367	0.0378735	1367.76	1608.02	1489.44	1426.18	788.573	923.225	241.965	856	366.817	205.497
28188	ENSG00000152234	ATP5F1A	protein_coding	3555.76	-0.899033	0.297679	-3.02014	0.00252657	0.0380393	5087.16	4179.67	5117.49	4192.04	3577.11	2560.75	1781.24	3058.6	1892.62	2525.38
2313	ENSG00000143147	GPR161	protein_coding	54.709	1.31143	0.434569	3.01778	0.00254637	0.0383084	30.8768	41.021	33.0206	34.2627	19.0194	72.8281	102.37	69.638	155.442	22.2828
29109	ENSG00000132819	RBM38	protein_coding	304.387	1.01273	0.335742	3.0164	0.00255797	0.0384542	95.1339	125.301	209.365	125.915	196.046	164.047	248.79	395.137	258.202	492.697
16080	ENSG00000136848	DAB2IP	protein_coding	613.624	-0.685362	0.227333	-3.0148	0.00257152	0.0386287	711.001	868.154	878.208	916.527	605.694	448.739	647.102	568.841	535.916	324.338
15288	ENSG00000153707	PTPRD	protein_coding	163.198	-1.67219	0.554834	-3.01385	0.00257953	0.0387201	121.004	215.547	555.73	398.304	95.0969	25.7473	134.012	110.325	48.7788	81.7035
16232	ENSG00000233901	LINC01503	lincRNA	12.6831	2.15776	0.716065	3.01336	0.00258372	0.0387538	4.17254	2.23751	2.81027	2.5697	16.0933	24.276	22.9557	11.7367	19.5115	12.3793
31556	ENSG00000100023	PPIL2	protein_coding	494.92	-0.952909	0.3163	-3.01267	0.00258958	0.0388126	613.363	525.069	562.053	526.789	838.316	354.577	331.306	412.351	324.542	160.931
28272	ENSG00000198796	ALPK2	protein_coding	15.1103	2.55862	0.849554	3.01172	0.00259773	0.0389057	3.33803	10.4417	2.1077	10.2788	0	33.1037	76.3121	3.91225	26.0154	7.42759
6178	ENSG00000064225	ST3GAL6	protein_coding	28.4063	1.46002	0.484945	3.01069	0.00260659	0.0389509	2.50352	23.8668	16.8616	22.2707	4.38909	31.6324	62.0424	21.9086	57.2338	12.3793
25644	ENSG00000135697	BCO1	protein_coding	32.627	-2.41653	0.802603	-3.01086	0.00260505	0.0389509	18.3592	44.7502	58.313	51.394	16.0933	0.735638	3.10212	14.8665	7.80461	9.90346
26455	ENSG00000109101	FOXN1	protein_coding	11.7636	-3.0887	1.02582	-3.01096	0.00260422	0.0389509	24.2007	4.47502	2.1077	7.7091	49.743	1.47128	0.620424	1.5649	1.30077	2.47586
20307	ENSG00000110944	IL23A	protein_coding	10.6354	1.89786	0.630655	3.00934	0.00261813	0.0390942	9.17959	12.6792	2.81027	5.99597	2.92606	42.667	27.2986	14.8665	22.1131	12.3793
9816	ENSG00000112699	GMDS	protein_coding	1836.43	-1.14861	0.381811	-3.00832	0.00262692	0.0391508	6062.7	1513.3	1293.43	2100.3	4471.02	2091.42	890.928	716.724	562.582	2579.85
15913	ENSG00000106799	TGFBR1	protein_coding	219.158	1.086	0.361009	3.00822	0.00262779	0.0391508	97.6374	259.551	167.913	192.728	93.6339	381.796	496.339	298.113	412.344	165.883
22819	ENSG00000223403	MEG9	lincRNA	3.62236	4.50012	1.49572	3.00867	0.00262396	0.0391508	0	0	0	0.856567	0	7.35638	6.20424	1.5649	9.10538	2.47586
7834	ENSG00000138795	LEF1	protein_coding	77.3833	1.34179	0.446085	3.00791	0.00263047	0.0391615	85.1198	74.5837	36.5335	68.5253	23.4085	200.829	114.778	215.956	197.717	29.7104
25887	ENSG00000167705	RILP	protein_coding	255.048	-1.36694	0.454551	-3.00723	0.00263639	0.0392205	277.057	137.234	138.406	86.5133	466.706	75.035	32.8825	122.845	71.5423	123.793
379	ENSG00000235241	BX284668.4	processed_pseudogene	40.1136	-1.76321	0.586532	-3.00616	0.00264566	0.0393291	119.335	48.4794	65.3387	47.1112	70.2254	36.7819	19.8536	30.5155	28.6169	2.47586
9815	ENSG00000054598	FOXC1	protein_coding	12.9891	2.81044	0.935085	3.00555	0.00265102	0.0393504	0.834508	5.96669	0.702567	1.71313	7.31515	30.8968	86.8593	3.1298	31.8688	2.47586
14328	ENSG00000104299	INTS9	protein_coding	85.3986	-0.92668	0.308316	-3.00562	0.00265041	0.0393504	135.19	118.588	134.893	107.927	95.0969	71.3569	49.0135	86.8519	79.9972	34.6621
4068	ENSG00000158050	DUSP2	protein_coding	55.0434	2.03221	0.676624	3.00346	0.00266929	0.0395922	45.0634	16.4084	23.8873	29.1233	21.9454	33.8393	67.6262	86.8519	137.881	220.352
13462	ENSG00000147065	MSN	protein_coding	762.991	1.37164	0.456758	3.00299	0.00267341	0.0396239	157.722	814.454	338.637	603.88	231.159	1411.69	1743.39	1064.13	1597.34	252.538
28895	ENSG00000204103	MAFB	protein_coding	107.106	1.65355	0.550694	3.00267	0.00267621	0.039636	25.0352	98.4505	30.9129	34.2627	20.4824	324.416	94.9248	100.936	226.984	29.7104
22321	ENSG00000139971	ARMH4	protein_coding	9.27667	2.33038	0.776654	3.00054	0.00269503	0.0398636	0.834508	6.71253	7.72823	3.42627	1.46303	35.3106	28.5395	14.0841	16.91	7.42759
25347	ENSG00000166592	RRAD	protein_coding	44.6307	1.80668	0.602132	3.00048	0.00269556	0.0398636	7.51057	1.49167	6.3231	10.2788	71.6884	22.8048	32.8825	25.8208	63.7376	34.6621
9038	ENSG00000092421	SEMA6A	protein_coding	280.193	-1.24167	0.413893	-2.99997	0.0027001	0.0399012	122.673	393.056	408.191	280.954	228.233	36.0462	305.869	185.441	96.2568	66.8483
20987	ENSG00000089041	P2RX7	protein_coding	14.023	1.73683	0.579026	2.99957	0.0027036	0.0399235	1.66902	11.1876	7.02567	6.85253	2.92606	22.0691	28.5395	12.5192	27.9665	7.42759
615	ENSG00000227050	AL512288.1	antisense	111.455	-1.90994	0.636879	-2.99891	0.00270945	0.0399804	190.268	93.2296	145.431	64.2425	219.454	49.2877	26.6782	74.3327	48.7788	0
13294	ENSG00000130988	RGN	protein_coding	4.63813	3.09928	1.03402	2.99732	0.00272366	0.0401605	0.834508	0.745837	0.702567	2.5697	0	3.67819	8.06551	17.9963	10.4061	2.47586
906	ENSG00000179178	TMEM125	protein_coding	437.551	-1.0988	0.366873	-2.99504	0.00274409	0.0404319	677.62	270.739	433.484	292.946	931.95	172.875	161.31	320.804	199.018	351.573
24250	ENSG00000188536	HBA2	protein_coding	50.5918	-2.80847	0.937929	-2.99433	0.00275046	0.0404959	55.912	12.6792	6.3231	8.56567	207.75	0	6.20424	5.47715	3.25192	19.8069
19609	ENSG00000197614	MFAP5	protein_coding	57.78	2.03656	0.68039	2.99322	0.00276051	0.0406139	3.33803	22.3751	68.149	23.1273	0	61.7936	76.3121	44.5996	171.701	7.42759
8774	ENSG00000176928	GCNT4	protein_coding	31.2407	-1.99631	0.667051	-2.99274	0.00276486	0.0406481	31.7113	79.0587	22.4821	29.1233	16.0933	15.4484	7.44508	10.9543	6.50384	4.95173
13730	ENSG00000157514	TSC22D3	protein_coding	598.878	1.4616	0.48857	2.99158	0.00277538	0.0407429	125.176	216.293	103.277	210.715	179.953	1368.29	337.51	578.231	444.863	212.924
21679	ENSG00000102595	UGGT2	protein_coding	134.354	1.18121	0.394816	2.9918	0.00277337	0.0407429	69.2641	128.284	104.682	135.338	49.743	286.899	300.285	136.929	223.082	180.738
18422	ENSG00000237036	ZEB1-AS1	antisense	19.1457	1.38242	0.462469	2.98921	0.00279698	0.0410003	9.17959	27.596	9.13337	11.1354	5.85212	33.1037	37.8458	23.4735	35.1207	19.8069
31745	ENSG00000169184	MN1	protein_coding	13.1523	2.33074	0.779717	2.98921	0.00279702	0.0410003	0.834508	5.96669	4.91797	4.28283	4.38909	41.1957	45.9114	6.2596	42.9254	2.47586
28259	ENSG00000119547	ONECUT2	protein_coding	10.0917	2.76722	0.926473	2.98684	0.0028188	0.0412895	0.834508	2.23751	2.1077	0.856567	7.31515	4.41383	39.0867	34.4278	7.80461	7.42759
344	ENSG00000142627	EPHA2	protein_coding	247.609	1.50167	0.503107	2.98479	0.00283771	0.0415057	170.24	182.73	144.026	101.931	149.229	448.739	439.88	557.104	470.228	227.78
14254	ENSG00000158941	CCAR2	protein_coding	964.222	-1.14096	0.382237	-2.98494	0.00283629	0.0415057	1472.91	695.866	759.474	792.324	2013.13	614.993	306.489	579.013	545.672	406.042
4679	ENSG00000138435	CHRNA1	protein_coding	7.93166	3.11239	1.04295	2.9842	0.00284317	0.0415552	0	0.745837	1.40513	1.71313	1.46303	2.94255	5.58381	16.4314	13.6581	2.47586
13478	ENSG00000181191	PJA1	protein_coding	113.022	1.36781	0.458486	2.98333	0.00285135	0.0416442	74.2712	106.655	108.898	116.493	23.4085	262.623	241.345	146.318	198.367	138.648
18737	ENSG00000122863	CHST3	protein_coding	45.3025	1.53161	0.51353	2.98252	0.00285889	0.041724	34.2148	22.3751	20.3744	33.4061	17.5564	68.4143	99.2678	65.7258	126.825	14.8552
7225	ENSG00000074211	PPP2R2C	protein_coding	8.42971	3.50222	1.17448	2.98193	0.00286435	0.0417428	11.6831	0	0	0.856567	0	61.7936	1.86127	32.0804	3.9023	4.95173
32644	ENSG00000210135	MT-TN	Mt_tRNA	507.615	-2.95907	0.992297	-2.98204	0.00286333	0.0417428	292.912	26.8501	25.995	37.6889	1097.27	54.4372	3.10212	17.2139	13.0077	0
32051	ENSG00000100412	ACO2	protein_coding	1285.54	-1.15728	0.388182	-2.98129	0.0028704	0.0418004	1569.71	1446.18	1449.39	1193.2	1593.24	977.662	718.451	1082.13	745.991	158.455
20429	ENSG00000174099	MSRB3	protein_coding	96.1296	2.25612	0.756829	2.98102	0.00287291	0.0418066	2.50352	61.9045	56.2053	36.8324	8.77818	202.3	330.065	93.1115	359.662	17.3311
174	ENSG00000158286	RNF207	protein_coding	130.006	-1.29993	0.436332	-2.97923	0.0028897	0.0419899	191.102	173.034	165.806	214.998	137.525	68.4143	47.1522	149.448	116.419	14.8552
30843	ENSG00000087076	HSD17B14	protein_coding	43.3562	1.86753	0.626815	2.97939	0.00288823	0.0419899	9.17959	4.47502	4.91797	4.28283	29.2606	40.4601	14.2697	14.8665	55.933	32.1862
28267	ENSG00000049759	NEDD4L	protein_coding	1149.29	-1.29603	0.43517	-2.97822	0.00289928	0.0420985	727.691	443.773	1316.61	1023.6	1599.09	395.773	472.763	312.198	264.706	378.807
30007	ENSG00000130518	IQCN	protein_coding	69.2256	-1.63094	0.547849	-2.97699	0.0029109	0.0422366	24.2007	26.1043	40.7489	27.4101	45.3539	8.09201	2.48169	10.9543	37.0719	7.42759
5495	ENSG00000131368	MRPS25	protein_coding	912.389	-0.975628	0.328076	-2.97378	0.00294152	0.04265	1435.35	716.003	732.074	881.407	2014.59	555.406	410.72	543.02	565.184	747.711
18880	ENSG00000188373	C10orf99	protein_coding	1002.3	-1.76814	0.594949	-2.97192	0.00295948	0.0428792	1840.92	1733.32	1414.27	1290.85	866.113	556.878	108.574	388.878	343.403	529.835
2726	ENSG00000162897	FCAMR	protein_coding	18.7947	1.53076	0.515478	2.96958	0.00298203	0.0431747	16.6902	8.95004	4.91797	6.85253	7.31515	42.667	16.7514	8.60695	22.7634	49.5173
8295	ENSG00000073578	SDHA	protein_coding	1566.6	-0.854833	0.287968	-2.9685	0.0029926	0.0432964	1984.46	1844.45	1991.07	1451.02	2013.13	1002.67	658.27	1219.06	1120.61	1141.37
484	ENSG00000249087	ZNF436-AS1	antisense	41.0642	-1.21986	0.410999	-2.96804	0.00299709	0.04333	85.1198	17.1542	28.8052	100.218	45.3539	30.1611	16.7514	11.7367	23.4138	19.8069
6913	ENSG00000182580	EPHB3	protein_coding	1196.4	-1.3998	0.471741	-2.96731	0.00300416	0.0434009	2948.32	830.116	1583.59	2634.8	2479.83	1291.78	311.453	726.896	680.952	851.697
24165	ENSG00000251209	LINC00923	lincRNA	5.68239	-3.29537	1.11084	-2.96655	0.00301164	0.0434462	2.50352	14.9167	20.3744	22.2707	7.31515	0	1.24085	2.34735	3.25192	0
30428	ENSG00000188766	SPRED3	protein_coding	5.71905	2.41554	0.814204	2.96675	0.00300968	0.0434462	0.834508	2.23751	2.81027	2.5697	1.46303	12.5058	12.4085	4.6947	12.3573	12.3793
20865	ENSG00000111335	OAS2	protein_coding	187.431	1.52675	0.514737	2.96608	0.00301625	0.0434814	56.7465	224.497	77.2823	106.214	98.023	119.909	655.167	485.901	329.094	128.745
11616	ENSG00000183742	MACC1	protein_coding	246.302	1.71236	0.577384	2.96572	0.00301972	0.0435	106.817	105.909	219.201	135.338	71.6884	461.245	1198.04	203.437	342.102	264.918
24349	ENSG00000187535	IFT140	protein_coding	190.377	-1.1157	0.376297	-2.96495	0.00302735	0.0435786	347.155	218.53	278.919	310.077	305.773	187.588	71.3487	136.929	169.1	116.366
17854	ENSG00000137710	RDX	protein_coding	82.3148	1.87069	0.630983	2.96473	0.00302953	0.0435786	10.0141	124.555	47.072	56.5334	1.46303	121.38	197.295	132.234	180.807	19.8069
29276	ENSG00000267530	LINC01836	lincRNA	4.66225	3.91452	1.32064	2.9641	0.00303569	0.0436359	0	0	0	0.856567	5.85212	0.735638	22.3353	7.8245	7.15423	12.3793
16296	ENSG00000148288	GBGT1	protein_coding	32.9888	1.47572	0.498013	2.96322	0.00304438	0.0437294	20.0282	19.3918	18.9693	9.42224	11.7042	39.7244	42.1888	35.2102	51.3803	66.8483
19646	ENSG00000110852	CLEC2B	protein_coding	102.067	1.38729	0.468329	2.96221	0.00305437	0.0438413	29.2078	44.7502	22.4821	22.2707	52.6691	80.1845	60.8015	109.543	150.889	79.2277
5676	ENSG00000144659	SLC25A38	protein_coding	446.558	-1.03103	0.34811	-2.96178	0.00305866	0.0438714	744.381	413.194	460.181	344.34	907.078	266.301	193.572	317.675	269.909	336.718
8973	ENSG00000184349	EFNA5	protein_coding	42.5216	-2.07343	0.700184	-2.96126	0.00306381	0.0439139	71.7677	34.3085	54.0976	55.6768	86.3187	44.8739	4.96339	18.7788	11.0565	0
574	ENSG00000060642	PIGV	protein_coding	112.436	-0.946632	0.319761	-2.96044	0.003072	0.0439905	171.074	143.947	201.637	206.433	111.19	81.6558	76.9325	84.5046	88.4522	94.0829
5101	ENSG00000124006	OBSL1	protein_coding	169.352	1.54582	0.522185	2.96028	0.00307355	0.0439905	84.2853	105.909	41.4514	133.624	42.4278	524.51	273.607	118.932	385.027	32.1862
5108	ENSG00000272944	AC079834.2	antisense	6.40917	-4.12943	1.39598	-2.95809	0.00309551	0.0442731	5.00705	1.49167	3.51283	0.856567	23.4085	0	0	0.78245	0	0
14313	ENSG00000253875	AC013643.2	antisense	41.7037	-2.4265	0.820564	-2.95711	0.00310537	0.0443824	76.7747	10.4417	14.0513	14.5616	147.766	11.7702	1.24085	22.691	14.9588	0
9081	ENSG00000164904	ALDH7A1	protein_coding	412.899	-0.888161	0.30041	-2.9565	0.00311151	0.0444384	614.198	557.886	916.849	627.864	356.979	253.059	262.439	539.89	266.007	349.097
17509	ENSG00000184154	LRTOMT	protein_coding	39.9446	-1.03491	0.350094	-2.95609	0.00311566	0.0444659	50.905	31.3251	51.2874	35.1192	68.7624	16.9197	15.5106	28.1682	25.365	29.7104
22948	ENSG00000211896	IGHG1	IG_C_gene	13139.2	2.06789	0.69975	2.95519	0.00312478	0.0445207	2206.44	3486.79	966.029	3589.02	4146.22	90687.9	1180.67	4778.42	21536.8	10685.8
26383	ENSG00000264785	AC005722.3	antisense	37.2366	-2.91511	0.986483	-2.95505	0.00312617	0.0445207	101.81	10.4417	19.6719	7.7091	226.77	14.7128	0.620424	7.04205	21.4627	0
32245	ENSG00000275993	SIK1B	protein_coding	51.1584	2.61052	0.883342	2.95528	0.00312386	0.0445207	8.34508	9.69588	16.159	34.2627	4.38909	40.4601	62.6628	207.349	124.223	24.7586
10611	ENSG00000271857	AL096865.1	antisense	5.53468	3.02548	1.0241	2.95429	0.00313392	0.0445676	0.834508	5.22086	0	1.71313	0	13.2415	5.58381	12.5192	7.80461	7.42759
19125	ENSG00000269609	RPARP-AS1	processed_transcript	319.531	-1.45787	0.493469	-2.95432	0.00313354	0.0445676	420.592	137.98	202.339	195.297	920.245	91.9547	66.3853	91.5466	106.013	309.483
9780	ENSG00000250222	AC008443.5	antisense	46.5259	-2.24293	0.759314	-2.95388	0.00313804	0.0445945	84.2853	13.4251	25.995	11.9919	134.599	7.35638	2.48169	25.8208	5.20307	17.3311
236	ENSG00000171603	CLSTN1	protein_coding	1393.6	-0.89581	0.303336	-2.95319	0.00314507	0.0446405	1707.4	1364.14	1552.67	1408.2	2238.43	1053.43	603.052	1051.61	1030.21	658.58
31113	ENSG00000244482	LILRA6	protein_coding	9.28112	2.8745	0.973374	2.95313	0.00314574	0.0446405	0	5.96669	1.40513	10.2788	0	14.7128	16.7514	14.8665	39.6734	7.42759
17863	ENSG00000214290	COLCA2	protein_coding	49.4395	-1.85846	0.629479	-2.95238	0.00315331	0.0447162	73.4367	153.642	46.3694	159.321	14.6303	23.5404	17.9923	71.9854	17.5604	2.47586
13227	ENSG00000147041	SYTL5	protein_coding	70.871	-1.93252	0.654744	-2.95157	0.00316167	0.044802	130.183	57.4294	186.18	184.162	21.9454	18.3909	12.4085	79.0274	22.1131	14.8552
31696	ENSG00000284128	AP000356.3	transcribed_unprocessed_pseudogene	31.2436	-3.25638	1.10335	-2.95135	0.00316384	0.044802	8.34508	2.98335	2.81027	1.71313	111.19	0	0	4.6947	2.60154	2.47586
16030	ENSG00000157657	ZNF618	protein_coding	38.8571	1.30773	0.443234	2.95042	0.00317339	0.0449056	26.7042	36.546	16.8616	23.1273	14.6303	46.3452	82.5163	66.5082	74.7942	22.2828
15071	ENSG00000169427	KCNK9	protein_coding	3.5909	4.83446	1.63921	2.94926	0.0031854	0.0450118	0	0	0	0	0	6.62074	1.24085	0.78245	3.25192	39.6138
26310	ENSG00000171953	ATPAF2	protein_coding	118.553	-1.13635	0.385299	-2.94927	0.00318526	0.0450118	187.764	121.571	133.488	99.3618	260.419	64.7361	37.8458	57.9013	74.7942	146.076
87	ENSG00000215915	ATAD3C	protein_coding	51.7936	2.69795	0.914939	2.94878	0.00319034	0.045018	4.17254	6.71253	2.1077	0.856567	46.8169	116.231	19.2331	5.47715	39.6734	163.407
14576	ENSG00000180828	BHLHE22	protein_coding	8.66629	2.57999	0.8749	2.94889	0.00318914	0.045018	2.50352	5.96669	1.40513	5.1394	0	9.56329	16.7514	29.7331	32.5192	0
16928	ENSG00000244953	AC087521.1	lincRNA	51.7231	2.67808	0.908461	2.94793	0.00319907	0.0451093	9.17959	2.98335	1.40513	5.1394	45.3539	19.8622	71.3487	51.6417	157.393	2.47586
10659	ENSG00000012660	ELOVL5	protein_coding	192.699	1.99163	0.675698	2.94752	0.00320331	0.0451374	83.4508	172.288	75.1746	170.457	26.3345	511.268	598.088	175.269	368.768	279.773
949	ENSG00000173846	PLK3	protein_coding	80.6051	1.01295	0.343801	2.94632	0.00321582	0.0452818	33.3803	55.1919	36.5335	71.095	79.0036	79.4489	168.755	106.413	137.231	61.8966
11671	ENSG00000086300	SNX10	protein_coding	39.9681	2.10147	0.713315	2.94606	0.00321852	0.0452879	4.17254	24.6126	12.6462	41.1152	2.92606	68.4143	114.158	51.6417	66.9896	29.7104
907	ENSG00000253313	C1orf210	protein_coding	197.709	-0.925914	0.314471	-2.94435	0.00323629	0.0454771	217.807	127.538	214.283	186.732	191.657	99.3111	82.5163	168.227	87.1515	71.8001
1722	ENSG00000265531	FCGR1CP	unprocessed_pseudogene	3.36477	3.4197	1.16213	2.94261	0.00325462	0.0454771	0	0.745837	0	0.856567	1.46303	9.56329	6.20424	4.6947	10.4061	0
8119	ENSG00000109738	GLRB	protein_coding	6.81626	2.39604	0.814378	2.94217	0.00325924	0.0454771	3.33803	2.98335	2.1077	1.71313	2.92606	30.1611	11.788	6.2596	30.5681	2.47586
14233	ENSG00000158856	DMTN	protein_coding	209.228	-1.09508	0.372008	-2.94369	0.00324329	0.0454771	286.236	225.243	394.842	335.774	310.162	190.53	130.289	193.265	120.971	96.5587
14381	ENSG00000253414	AC124067.2	sense_intronic	44.4115	-2.1858	0.742477	-2.94393	0.00324077	0.0454771	188.599	15.6626	30.9129	29.9798	174.1	53.7016	1.86127	11.7367	3.25192	34.6621
15401	ENSG00000122711	SPINK4	protein_coding	2282.45	-2.65777	0.902945	-2.94345	0.00324581	0.0454771	13380.5	744.345	3946.32	1990.66	3441.04	16.184	32.8825	1560.99	345.354	1351.82
17899	ENSG00000149292	TTC12	protein_coding	146.107	-0.703896	0.239222	-2.94244	0.00325639	0.0454771	151.046	159.609	190.396	160.178	277.976	66.943	116.019	153.36	85.8507	175.786
19313	ENSG00000121898	CPXM2	protein_coding	37.397	1.77499	0.603184	2.9427	0.00325359	0.0454771	4.17254	27.596	10.5385	17.9879	10.2412	73.5638	47.7726	25.8208	117.069	4.95173
26222	ENSG00000153976	HS3ST3A1	protein_coding	6.84163	3.06251	1.04089	2.94221	0.00325877	0.0454771	0.834508	1.49167	4.2154	1.71313	0	11.0346	35.3641	7.8245	36.4215	0
26772	ENSG00000141736	ERBB2	protein_coding	1767.93	-0.790172	0.268519	-2.9427	0.0032536	0.0454771	2072.08	1358.17	1975.62	1707.99	3403.01	1243.23	974.065	1532.04	916.391	1228.03
30481	ENSG00000176401	EID2B	protein_coding	6.92375	3.05617	1.03826	2.94354	0.00324479	0.0454771	0	2.23751	1.40513	0.856567	0	11.0346	13.0289	1.5649	17.5604	2.47586
31986	ENSG00000221890	NPTXR	protein_coding	11.2089	2.43021	0.825775	2.94294	0.00325111	0.0454771	5.84155	2.23751	0.702567	0.856567	2.92606	4.41383	23.5761	13.3016	24.7146	2.47586
9522	ENSG00000055163	CYFIP2	protein_coding	298.652	-0.889861	0.302591	-2.9408	0.00327363	0.0456187	468.993	328.168	453.155	329.778	320.403	339.865	189.85	122.845	197.717	212.924
31380	ENSG00000131002	TXLNGY	transcribed_unprocessed_pseudogene	332.889	-1.53822	0.523066	-2.94077	0.00327395	0.0456187	413.916	0.745837	779.146	950.789	455.002	512.004	0.620424	403.744	139.182	64.3725
15533	ENSG00000137124	ALDH1B1	protein_coding	664.466	-0.761684	0.259165	-2.939	0.00329278	0.0458491	1180.83	839.812	1262.51	1086.13	831.001	659.867	573.892	535.978	749.893	532.311
28311	ENSG00000119541	VPS4B	protein_coding	490.056	-0.765682	0.260586	-2.93831	0.00330011	0.0458555	459.814	651.861	647.766	651.847	481.337	344.278	438.64	413.916	262.105	277.297
28591	ENSG00000125850	OVOL2	protein_coding	187.162	-1.22875	0.418128	-2.9387	0.00329587	0.0458555	313.775	76.0754	162.995	131.911	629.103	76.5063	42.8092	94.6764	65.6888	282.249
32659	ENSG00000198695	MT-ND6	protein_coding	17050	-1.50654	0.512708	-2.93841	0.00329906	0.0458555	21929.2	18227.5	26433.4	28963.1	16855.6	26831.6	1989.08	8545.92	5922.4	7184.96
14559	ENSG00000254777	AC022182.1	lincRNA	6.19287	-2.26428	0.770837	-2.93743	0.00330941	0.0459527	7.51057	13.4251	10.5385	6.85253	10.2412	2.20691	0.620424	3.91225	0.650384	4.95173
4088	ENSG00000168758	SEMA4C	protein_coding	202.197	1.03277	0.351683	2.93666	0.00331768	0.0460038	131.852	162.592	207.257	238.126	68.7624	396.509	352.401	402.179	396.084	128.745
6319	ENSG00000121594	CD80	protein_coding	9.42289	3.34343	1.13848	2.93675	0.0033167	0.0460038	0	14.9167	0	3.42627	0	11.0346	23.5761	21.9086	22.1131	9.90346
22924	ENSG00000184887	BTBD6	protein_coding	471.368	-1.10704	0.377236	-2.9346	0.00333976	0.0462778	963.856	392.31	507.956	471.968	841.242	308.968	216.528	314.545	346.655	282.249
18489	ENSG00000169826	CSGALNACT2	protein_coding	118.727	1.4599	0.497529	2.9343	0.00334298	0.0462904	19.1937	119.334	73.0669	110.497	23.4085	207.45	304.628	154.925	311.534	37.138
7574	ENSG00000173597	SULT1B1	protein_coding	905.529	-1.66686	0.568372	-2.93269	0.00336041	0.0464997	666.772	1775.84	1284.29	910.531	494.504	305.29	117.88	1312.17	161.295	170.835
28645	ENSG00000178726	THBD	protein_coding	66.1278	1.94684	0.664455	2.92998	0.00338984	0.0468744	14.1866	73.092	11.9436	36.8324	11.7042	102.254	150.763	104.848	176.254	27.2345
209	ENSG00000116285	ERRFI1	protein_coding	356.253	1.82817	0.624363	2.92805	0.0034109	0.0471331	133.521	204.359	204.447	101.075	93.6339	659.131	781.113	637.697	661.441	178.262
22538	ENSG00000119723	COQ6	protein_coding	344.064	-1.5085	0.515262	-2.92764	0.0034155	0.047164	489.022	269.247	351.986	244.122	512.06	202.3	113.538	218.304	167.149	19.8069
8661	ENSG00000049192	ADAMTS6	protein_coding	14.7229	3.05696	1.04435	2.92714	0.0034209	0.0472061	0	8.95004	4.2154	4.28283	0	50.0234	81.8959	9.3894	50.0796	2.47586
29185	ENSG00000101190	TCFL5	protein_coding	54.27	1.62237	0.554426	2.92621	0.00343121	0.0473157	18.3592	50.7169	39.3437	49.6809	17.5564	69.1499	201.638	43.0347	111.216	123.793
17811	ENSG00000149968	MMP3	protein_coding	566.706	2.71199	0.927261	2.92474	0.00344747	0.0474745	74.2712	64.8878	137.703	218.425	172.637	132.415	4531.57	336.453	2629.5	168.359
32000	ENSG00000100311	PDGFB	protein_coding	46.5953	2.14662	0.733928	2.92484	0.00344636	0.0474745	1.66902	30.5793	24.5898	25.697	11.7042	79.4489	166.274	79.8099	155.442	19.8069
2488	ENSG00000116701	NCF2	protein_coding	95.1641	1.61626	0.55291	2.92319	0.00346471	0.0476462	12.5176	118.588	43.5591	96.7921	14.6303	159.633	203.499	193.265	210.724	42.0897
17173	ENSG00000177363	LRRN4CL	protein_coding	19.2211	1.67545	0.573143	2.92327	0.00346374	0.0476462	10.0141	17.1542	9.83593	3.42627	4.38909	21.3335	17.3719	37.5576	44.2261	17.3311
21251	ENSG00000102678	FGF9	protein_coding	8.92065	-2.40251	0.822102	-2.9224	0.00347341	0.0477255	4.17254	12.6792	10.5385	10.2788	0	0.735638	0.620424	1.5649	3.25192	0
21866	ENSG00000214274	ANG	protein_coding	181.721	-1.28766	0.440641	-2.92224	0.00347524	0.0477255	330.465	91.7379	200.231	167.031	298.458	94.8973	24.1965	147.101	115.118	101.51
2337	ENSG00000188404	SELL	protein_coding	36.3099	2.64678	0.906119	2.92101	0.00348895	0.0478492	0.834508	22.3751	4.91797	52.2506	1.46303	67.6787	53.3564	69.638	39.023	37.138
30000	ENSG00000216490	IFI30	protein_coding	7.14095	3.03301	1.03834	2.92101	0.00348903	0.0478492	5.00705	0.745837	0	6.85253	0	8.09201	9.92678	16.4314	27.9665	7.42759
18759	ENSG00000166321	NUDT13	protein_coding	33.8562	-1.20062	0.411137	-2.92024	0.00349758	0.0479336	45.8979	42.5127	75.8772	59.1031	64.3733	30.8968	19.2331	32.0804	35.1207	9.90346
30033	ENSG00000105664	COMP	protein_coding	36.0195	3.6019	1.23356	2.91992	0.00350119	0.0479502	2.50352	1.49167	0.702567	0	36.5757	328.094	26.0578	0.78245	132.678	7.42759
27189	ENSG00000108846	ABCC3	protein_coding	1716.32	-0.927264	0.317597	-2.91963	0.00350451	0.0479629	2182.24	1978.71	1849.16	1385.07	3129.42	1312.38	1258.84	1141.59	636.076	1057.19
14258	ENSG00000179388	EGR3	protein_coding	36.4076	1.51935	0.520466	2.9192	0.00350929	0.0479954	18.3592	29.8335	14.0513	44.5415	5.85212	61.0579	126.566	47.7294	94.3057	9.90346
2490	ENSG00000143344	RGL1	protein_coding	94.0297	1.41665	0.485332	2.91893	0.00351238	0.048005	19.1937	59.6669	33.0206	49.6809	29.2606	129.472	160.069	131.452	134.63	22.2828
18606	ENSG00000226200	SGMS1-AS1	antisense	48.088	-1.57363	0.539531	-2.91666	0.00353802	0.0483224	28.3733	32.8168	42.154	48.8243	49.743	16.9197	18.6127	7.04205	6.50384	17.3311
15177	ENSG00000182325	FBXL6	protein_coding	331.629	0.687754	0.235851	2.91605	0.00354492	0.0483734	334.638	312.506	290.863	283.524	254.567	597.338	442.362	544.585	453.968	363.952
17263	ENSG00000168060	NAALADL1	protein_coding	153.225	1.65388	0.567194	2.9159	0.00354659	0.0483734	10.8486	11.9334	9.13337	15.4182	27.7976	39.7244	45.9114	17.2139	63.0873	69.3242
560	ENSG00000142669	SH3BGRL3	protein_coding	4271.11	-1.83543	0.629656	-2.91498	0.00355714	0.0484182	7606.54	1447.67	1284.99	1446.74	14424	1151.27	541.63	1152.55	1121.91	1297.35
6430	ENSG00000187715	KBTBD12	protein_coding	48.5155	-2.6634	0.913643	-2.91514	0.00355527	0.0484182	63.4226	2.23751	204.447	163.604	65.8363	10.2989	0	52.4241	4.55269	29.7104
25598	ENSG00000205078	SYCE1L	protein_coding	151.618	-2.20677	0.756942	-2.91537	0.00355269	0.0484182	125.176	25.3585	29.5078	14.5616	368.683	22.0691	3.72254	21.1261	14.9588	9.90346
20564	ENSG00000139220	PPFIA2	protein_coding	7.91924	2.30189	0.790192	2.91308	0.00357879	0.0486798	3.33803	6.71253	1.40513	4.28283	0	16.184	24.1965	8.60695	27.9665	0
32542	ENSG00000142178	SIK1	protein_coding	30.3212	2.68538	0.922437	2.91118	0.00360068	0.0489443	10.8486	21.6293	0	13.7051	1.46303	25.0117	78.7938	16.4314	81.9484	2.47586
18198	ENSG00000067082	KLF6	protein_coding	1094.22	1.01145	0.34762	2.90965	0.00361833	0.0491508	333.803	760.008	576.105	551.629	479.874	1141.71	1610	1189.32	880.62	680.863
11661	ENSG00000105928	GSDME	protein_coding	29.4338	3.06001	1.05262	2.90703	0.00364873	0.0495219	0	12.6792	11.9436	5.1394	0	38.9888	53.3564	29.7331	70.2415	9.90346
14312	ENSG00000147419	CCDC25	protein_coding	252.218	-1.08322	0.372641	-2.90687	0.00365059	0.0495219	267.042	346.814	412.407	325.495	270.66	172.875	99.2678	239.43	169.1	111.414
31524	ENSG00000237476	LINC01637	lincRNA	46.5402	-1.47692	0.5082	-2.90618	0.0036587	0.0495983	52.574	71.6003	67.4464	63.3859	80.4666	19.8622	34.1233	19.5612	20.8123	24.7586
28075	ENSG00000198795	ZNF521	protein_coding	29.3308	1.60794	0.553507	2.905	0.00367249	0.0497514	10.8486	44.7502	5.62053	12.8485	10.2412	33.1037	89.9614	33.6453	82.5988	7.42759
537	ENSG00000117643	MAN1C1	protein_coding	35.7594	1.50752	0.519358	2.90267	0.0037	0.0500564	15.8556	27.596	10.5385	23.9839	4.38909	54.4372	22.9557	58.6837	82.5988	12.3793
26149	ENSG00000178971	CTC1	protein_coding	287.719	-1.12193	0.3865	-2.90279	0.00369855	0.0500564	207.792	290.876	262.76	286.95	362.831	140.507	119.121	127.539	111.216	118.841
5476	ENSG00000180438	TPRXL	transcribed_processed_pseudogene	7.89298	3.68068	1.2683	2.90205	0.00370727	0.0501208	0	2.23751	0	0.856567	4.38909	38.9888	8.68593	0	53.3315	4.95173
1160	ENSG00000226476	LINC01748	lincRNA	22.944	2.54319	0.876438	2.90174	0.00371098	0.0501291	15.0211	2.23751	14.0513	9.42224	1.46303	192.001	27.2986	12.5192	26.6657	24.7586
2601	ENSG00000176393	RNPEP	protein_coding	772.206	-0.598044	0.206137	-2.90119	0.00371742	0.0501291	958.015	824.15	867.67	752.922	880.744	589.246	475.865	645.521	572.988	552.118
11465	ENSG00000225968	ELFN1	protein_coding	7.88152	2.7339	0.942416	2.90094	0.00372041	0.0501291	0.834508	2.23751	2.81027	7.7091	0	10.2989	14.2697	17.2139	31.2184	12.3793
20358	ENSG00000135502	SLC26A10	protein_coding	14.1605	2.51846	0.868057	2.90126	0.00371659	0.0501291	1.66902	3.72918	0.702567	9.42224	2.92606	18.3909	29.1599	7.8245	41.6246	0
28265	ENSG00000081923	ATP8B1	protein_coding	1170.16	-1.17466	0.4049	-2.90112	0.00371833	0.0501291	966.36	2637.28	2137.21	2117.43	441.835	724.603	1270.63	896.688	385.678	361.476
4589	ENSG00000169432	SCN9A	protein_coding	38.8036	-1.54924	0.534173	-2.90026	0.00372856	0.0501376	4.17254	78.3129	51.9899	60.8162	14.6303	6.62074	23.5761	7.8245	23.4138	2.47586
9680	ENSG00000160867	FGFR4	protein_coding	499.171	-0.897771	0.309508	-2.90064	0.00372401	0.0501376	763.575	416.177	378.683	627.864	1195.29	219.22	175.58	364.622	362.914	834.366
31012	ENSG00000171051	FPR1	protein_coding	38.6721	2.28322	0.787244	2.90027	0.00372841	0.0501376	3.33803	32.071	2.81027	38.5455	13.1673	108.874	67.6262	110.325	72.843	47.0414
5666	ENSG00000144655	CSRNP1	protein_coding	158.789	1.5904	0.548492	2.89958	0.0037366	0.0501446	51.7395	75.3295	74.4721	121.632	64.3733	108.139	285.395	315.327	346.004	146.076
27103	ENSG00000120075	HOXB5	protein_coding	391.352	-1.47897	0.510041	-2.8997	0.00373515	0.0501446	892.089	372.918	462.289	531.071	1075.33	623.821	86.8593	298.896	92.3545	240.159
32461	ENSG00000157551	KCNJ15	protein_coding	10.498	3.25786	1.12353	2.89966	0.0037357	0.0501446	0	5.96669	0	17.1313	0	11.0346	73.8304	4.6947	31.8688	7.42759
6228	ENSG00000144821	MYH15	protein_coding	13.3953	-1.97867	0.682479	-2.89923	0.00374075	0.0501667	7.51057	16.4084	36.5335	14.5616	2.92606	1.47128	3.10212	7.8245	3.9023	2.47586
30954	ENSG00000267968	AC011523.1	antisense	6.40797	-3.65525	1.26096	-2.8988	0.00374599	0.0502033	30.0423	2.98335	10.5385	14.5616	14.6303	4.41383	0	0	1.95115	0
30751	ENSG00000204851	PNMA8B	protein_coding	11.5878	3.00178	1.03575	2.89817	0.00375347	0.0502699	0	3.72918	1.40513	4.28283	0	13.9771	15.5106	7.8245	25.365	0
31014	ENSG00000187474	FPR3	protein_coding	111.325	1.79878	0.620767	2.89768	0.00375931	0.0503144	12.5176	126.046	59.0156	65.9556	14.6303	150.806	201.017	201.09	256.251	49.5173
1113	ENSG00000162390	ACOT11	protein_coding	679.929	-1.2621	0.435846	-2.89576	0.00378242	0.0505899	697.648	393.802	340.745	291.233	983.156	233.197	199.156	232.388	141.133	151.028
3742	ENSG00000115946	PNO1	protein_coding	127.584	0.943555	0.326034	2.89404	0.00380324	0.0507615	126.011	114.113	153.16	100.218	67.2993	188.323	215.907	211.261	199.018	217.876
9696	ENSG00000196923	PDLIM7	protein_coding	425.577	1.45383	0.50237	2.89395	0.00380425	0.0507615	293.747	165.576	145.431	123.346	424.278	634.12	586.3	356.015	1241.58	304.531
25055	ENSG00000099365	STX1B	protein_coding	7.75504	2.48099	0.85733	2.89386	0.0038054	0.0507615	1.66902	5.22086	0.702567	3.42627	0	11.0346	7.44508	7.04205	31.2184	7.42759
27044	ENSG00000108379	WNT3	protein_coding	15.9051	2.47756	0.855959	2.89449	0.00379779	0.0507615	5.84155	7.45837	4.91797	15.4182	0	26.483	41.5684	34.4278	19.5115	14.8552
7605	ENSG00000124875	CXCL6	protein_coding	46.654	3.47513	1.20096	2.89363	0.00380815	0.0507643	5.84155	6.71253	6.3231	82.2304	0	22.0691	131.53	92.3291	173.653	14.8552
28795	ENSG00000101000	PROCR	protein_coding	160.363	1.41016	0.487776	2.89101	0.0038401	0.0511562	153.549	148.422	59.7182	97.6486	55.5951	211.128	106.092	318.457	243.244	406.042
21801	ENSG00000057593	F7	protein_coding	6.03377	5.02059	1.73739	2.88973	0.00385567	0.0513294	0	0	0	0	0	0	6.20424	6.2596	61.1361	0
9222	ENSG00000146013	GFRA3	protein_coding	9.65229	2.5175	0.871265	2.88947	0.00385887	0.0513378	1.66902	0.745837	1.40513	0	1.46303	3.67819	1.86127	8.60695	14.3085	7.42759
5554	ENSG00000077092	RARB	protein_coding	14.7782	2.20597	0.763672	2.88864	0.00386914	0.0514403	5.84155	15.6626	3.51283	5.99597	4.38909	34.575	42.1888	21.9086	60.4857	4.95173
14288	ENSG00000277586	NEFL	protein_coding	7.27986	-3.35586	1.1621	-2.88776	0.00387996	0.0514951	44.2289	16.4084	8.4308	4.28283	2.92606	2.20691	0	0	4.55269	0
16835	ENSG00000176971	FIBIN	protein_coding	50.5008	2.51877	0.872189	2.88787	0.00387859	0.0514951	0.834508	23.1209	11.2411	41.9718	5.85212	178.024	134.012	91.5466	187.961	4.95173
25467	ENSG00000261602	AC092115.2	antisense	134.044	-2.00417	0.694043	-2.88768	0.00388098	0.0514951	401.398	335.627	201.637	230.416	122.894	217.749	37.8458	85.287	111.866	0
6959	ENSG00000136514	RTP4	protein_coding	77.2121	-0.872644	0.302286	-2.88682	0.00389159	0.0515675	110.155	67.8712	97.6568	77.091	133.136	45.6095	35.3641	78.245	50.0796	51.9932
25236	ENSG00000169715	MT1E	protein_coding	2026.36	-1.15353	0.399584	-2.88683	0.00389142	0.0515675	393.888	466.148	1894.82	822.304	1975.09	122.116	152.004	848.176	719.325	955.684
18514	ENSG00000107551	RASSF4	protein_coding	276.596	1.13665	0.393875	2.8858	0.00390415	0.0516996	78.4437	191.68	97.6568	174.74	98.023	667.223	241.965	161.967	453.318	136.173
18236	ENSG00000170525	PFKFB3	protein_coding	226.932	1.72107	0.596456	2.88549	0.00390809	0.0517175	64.2571	195.409	126.462	134.481	49.743	248.646	752.574	372.446	528.112	113.89
2107	ENSG00000272405	AL365181.3	antisense	158.737	-1.11388	0.386149	-2.8846	0.00391911	0.0517625	366.349	128.284	172.831	101.075	463.78	153.013	24.8169	97.0238	106.013	215.4
12268	ENSG00000242265	PEG10	protein_coding	5.61214	2.9527	1.02361	2.88459	0.00391924	0.0517625	0.834508	4.47502	2.1077	0.856567	0	4.41383	8.06551	8.60695	15.6092	14.8552
26878	ENSG00000177469	CAVIN1	protein_coding	1067.99	1.5357	0.532307	2.88499	0.00391428	0.0517625	272.05	383.36	234.657	304.081	1186.52	947.501	1415.19	730.026	1835.38	453.083
24618	ENSG00000185338	SOCS1	protein_coding	40.269	1.63541	0.567043	2.88409	0.00392542	0.0518098	17.5247	40.2752	9.13337	20.5576	20.4824	58.1154	44.6705	57.9013	78.6965	79.2277
17810	ENSG00000196611	MMP1	protein_coding	998.849	2.85242	0.989542	2.88257	0.00394446	0.0520268	156.887	107.401	109.6	283.524	623.25	150.07	7627.49	384.965	5013.16	307.007
5790	ENSG00000160796	NBEAL2	protein_coding	1271.88	-0.898013	0.311628	-2.88168	0.00395558	0.0521291	1870.13	1493.91	1278.67	1819.35	3338.63	881.294	1344.46	935.028	1009.4	769.994
10453	ENSG00000180316	PNPLA1	protein_coding	3.47363	4.91133	1.70441	2.88154	0.00395743	0.0521291	1.66902	0	0	0	0	0.735638	10.5472	0.78245	5.85346	22.2828
32551	ENSG00000215458	AATBC	antisense	24.7088	-1.92107	0.666794	-2.88106	0.00396338	0.0521732	95.1339	32.071	38.6412	35.9758	77.5405	12.5058	17.9923	10.9543	21.4627	14.8552
21309	ENSG00000139515	PDX1	protein_coding	35.0068	1.6374	0.568454	2.88044	0.00397117	0.0522414	17.5247	21.6293	2.81027	16.2748	52.6691	154.484	102.37	4.6947	26.6657	76.7518
2847	ENSG00000143507	DUSP10	protein_coding	47.4259	1.37204	0.476731	2.87801	0.00400191	0.0526111	25.8697	43.2585	48.4771	49.6809	7.31515	104.461	147.661	56.3364	106.663	34.6621
17170	ENSG00000214756	CSKMT	protein_coding	51.1951	-1.22347	0.42518	-2.87754	0.00400794	0.0526559	107.651	48.4794	47.072	41.9718	117.042	22.8048	10.5472	43.8172	26.0154	74.2759
26363	ENSG00000072134	EPN2	protein_coding	174.222	-0.666416	0.231632	-2.87704	0.00401419	0.0527033	277.057	191.68	222.714	218.425	248.715	156.691	142.697	139.276	151.539	138.648
17515	ENSG00000110195	FOLR1	protein_coding	11.5222	2.35765	0.819539	2.87681	0.00401723	0.0527087	5.84155	1.49167	3.51283	2.5697	17.5564	36.7819	3.72254	26.6033	29.2673	29.7104
9171	ENSG00000251169	LINC01843	lincRNA	63.8338	-1.65497	0.575416	-2.87613	0.00402581	0.0527866	101.81	44.7502	73.0669	45.398	144.84	26.483	13.0289	45.3821	3.25192	64.3725
14705	ENSG00000170323	FABP4	protein_coding	47.4962	2.20862	0.768306	2.87466	0.00404457	0.0529632	0	4.47502	5.62053	0.856567	5.85212	13.9771	6.20424	20.3437	27.3161	4.95173
22552	ENSG00000119681	LTBP2	protein_coding	155.327	1.70186	0.591979	2.87487	0.00404195	0.0529632	14.1866	167.813	61.8259	98.5052	84.8557	391.359	300.905	216.739	606.158	51.9932
24956	ENSG00000174992	ZG16	protein_coding	5670.46	-2.73366	0.951027	-2.87443	0.00404753	0.0529673	4648.21	985.996	1490.14	457.407	3479.08	13.9771	1.86127	1333.29	422.099	1188.41
14745	ENSG00000104312	RIPK2	protein_coding	81.3022	1.23004	0.428087	2.87334	0.00406156	0.0531162	64.2571	62.6503	90.6311	65.9556	39.5018	120.645	159.449	212.044	130.077	118.841
30958	ENSG00000167749	KLK4	protein_coding	5.36656	-2.88689	1.00515	-2.87211	0.0040774	0.0532885	6.67606	2.98335	21.7796	17.9879	11.7042	3.67819	0	1.5649	3.25192	0
25682	ENSG00000064270	ATP2C2	protein_coding	730.329	-0.952293	0.331814	-2.86996	0.00410526	0.0535827	605.853	750.312	1240.03	1532.4	336.497	445.061	652.686	418.611	433.806	212.924
28199	ENSG00000167216	KATNAL2	protein_coding	18.5596	-1.40332	0.488953	-2.87004	0.00410414	0.0535827	25.8697	30.5793	37.236	23.9839	17.5564	11.0346	6.20424	7.8245	11.7069	17.3311
19105	ENSG00000166169	POLL	protein_coding	273.453	-1.00591	0.350533	-2.86966	0.0041091	0.0535977	354.666	223.005	275.406	249.261	570.581	156.691	90.5819	143.971	148.938	336.718
505	ENSG00000142661	MYOM3	protein_coding	65.6451	1.4332	0.499705	2.8681	0.0041295	0.0537284	35.0493	12.6792	56.2053	24.8404	99.486	80.9201	122.223	131.452	70.8919	123.793
668	ENSG00000284543	LINC01226	processed_transcript	46.1447	-1.9138	0.66728	-2.86807	0.00412985	0.0537284	181.923	17.9001	46.3694	24.8404	163.859	39.7244	16.131	12.5192	5.20307	14.8552
3226	ENSG00000205795	CYS1	protein_coding	21.2427	1.79118	0.624516	2.86811	0.00412934	0.0537284	0.834508	5.22086	8.4308	5.99597	2.92606	11.7702	14.2697	7.04205	42.9254	9.90346
13148	ENSG00000169891	REPS2	protein_coding	199.336	-1.01207	0.352813	-2.86857	0.00412338	0.0537284	380.536	293.86	403.273	322.069	239.937	244.967	269.264	102.501	100.159	163.407
20999	ENSG00000212694	LINC01089	lincRNA	365.126	-1.5981	0.557395	-2.8671	0.00414256	0.0538587	499.87	167.067	187.585	218.425	778.332	115.495	62.0424	77.4625	111.216	232.731
25662	ENSG00000140945	CDH13	protein_coding	77.9422	1.3583	0.473814	2.86674	0.00414718	0.0538838	10.0141	134.251	41.4514	89.083	26.3345	115.495	250.031	90.7642	207.473	34.6621
6604	ENSG00000144935	TRPC1	protein_coding	14.1428	2.01135	0.701914	2.86552	0.0041632	0.0540567	0.834508	15.6626	3.51283	5.99597	1.46303	23.5404	39.0867	11.7367	29.2673	0
15727	ENSG00000197506	SLC28A3	protein_coding	59.4672	-2.10994	0.736511	-2.86477	0.00417311	0.0541503	43.3944	104.417	209.365	185.875	23.4085	52.9659	21.0944	105.631	13.6581	4.95173
28944	ENSG00000025772	TOMM34	protein_coding	302.16	1.08461	0.378665	2.8643	0.00417929	0.0541954	331.3	220.768	285.242	180.736	219.454	361.934	668.196	321.587	442.912	930.925
9586	ENSG00000254042	AC011365.1	antisense	28.8987	-2.08963	0.72965	-2.86388	0.00418485	0.0542167	60.9191	5.96669	26.6975	8.56567	57.0581	11.0346	5.58381	2.34735	9.75576	2.47586
31111	ENSG00000204577	LILRB3	protein_coding	56.7496	1.61433	0.56371	2.86377	0.00418636	0.0542167	13.3521	23.8668	2.81027	32.5495	39.5018	57.3797	51.4952	45.3821	65.0384	54.469
4268	ENSG00000144136	SLC20A1	protein_coding	472.313	0.857324	0.299491	2.86261	0.0042017	0.0543802	284.567	237.922	201.637	186.732	431.594	475.958	454.15	399.049	535.266	440.704
8128	ENSG00000171503	ETFDH	protein_coding	417.467	-1.23326	0.430905	-2.86204	0.00420929	0.0544432	493.194	372.918	396.248	346.91	446.224	167.725	215.907	262.121	144.385	66.8483
22035	ENSG00000259321	AL136295.2	lincRNA	55.1647	-1.89416	0.66187	-2.86183	0.00421201	0.0544432	136.859	26.1043	28.8052	37.6889	137.525	27.9542	5.58381	29.7331	22.7634	2.47586
2864	ENSG00000197520	FAM177B	protein_coding	27.6616	-2.23214	0.780145	-2.86118	0.00422068	0.0544857	32.5458	13.4251	54.8002	73.6647	2.92606	10.2989	0	21.9086	5.20307	4.95173
23622	ENSG00000140455	USP3	protein_coding	333.293	-0.680006	0.237667	-2.86118	0.00422074	0.0544857	387.212	387.835	583.833	427.427	362.831	240.554	329.445	397.485	273.812	143.6
24109	ENSG00000166965	RCCD1	protein_coding	222.868	-0.77346	0.270383	-2.86061	0.00422821	0.0545469	347.155	281.926	356.904	302.368	362.831	179.496	174.959	227.693	188.611	200.545
16522	ENSG00000214063	TSPAN4	protein_coding	231.444	1.3585	0.475019	2.85988	0.00423801	0.054638	90.9613	86.5171	49.8822	65.9556	92.1708	269.979	134.632	154.143	304.38	136.173
12102	ENSG00000106683	LIMK1	protein_coding	136.067	0.879594	0.307611	2.85944	0.00424391	0.0546438	95.1339	128.284	113.816	119.063	95.0969	202.3	218.389	211.261	304.38	99.0346
23651	ENSG00000241839	PLEKHO2	protein_coding	197.614	1.17157	0.409697	2.8596	0.00424182	0.0546438	55.912	134.251	50.5848	88.2264	166.785	206.714	161.31	192.483	279.665	183.214
31243	ENSG00000198300	PEG3	protein_coding	7.27455	2.77361	0.970207	2.85878	0.00425273	0.0547221	0	3.72918	2.1077	2.5697	0	11.7702	31.0212	3.91225	19.5115	2.47586
22156	ENSG00000129514	FOXA1	protein_coding	165.026	-1.85541	0.649341	-2.85738	0.00427154	0.0549289	288.74	284.164	429.268	359.758	95.0969	178.024	10.5472	320.804	63.0873	9.90346
25586	ENSG00000273971	AC009163.6	lincRNA	10.827	-3.66539	1.28305	-2.85678	0.00427957	0.0549967	15.0211	0	1.40513	2.5697	20.4824	0	0	1.5649	0	0
25167	ENSG00000278909	AC007608.4	TEC	22.1233	-3.39558	1.1888	-2.85632	0.00428588	0.0550424	86.7888	5.22086	9.13337	9.42224	115.579	8.09201	0	0	1.30077	61.8966
19094	ENSG00000236662	AL133215.1	antisense	184.828	-2.28703	0.800809	-2.8559	0.00429156	0.0550753	176.916	52.9544	55.5028	52.2506	517.912	28.6899	19.8536	39.1225	26.0154	0
27006	ENSG00000168517	HEXIM2	protein_coding	79.9941	-1.53176	0.53642	-2.85552	0.00429665	0.0550753	166.067	46.9877	54.0976	71.9516	232.622	41.1957	20.474	42.2523	50.73	17.3311
29210	ENSG00000130589	HELZ2	protein_coding	325.052	1.29455	0.453352	2.85552	0.0042967	0.0550753	134.356	332.643	236.765	237.269	114.116	378.853	1282.42	342.713	412.344	450.607
8091	ENSG00000137460	FHDC1	protein_coding	185.798	-1.71065	0.599361	-2.85412	0.00431562	0.0552471	208.627	319.218	448.94	650.134	62.9103	139.771	346.817	75.8976	37.0719	37.138
22189	ENSG00000185246	PRPF39	protein_coding	431.393	-0.949351	0.332619	-2.85417	0.00431501	0.0552471	770.251	403.498	476.34	513.94	719.81	381.06	338.131	377.141	285.519	148.552
499	ENSG00000179163	FUCA1	protein_coding	860.841	-0.842158	0.295116	-2.85365	0.00432198	0.0552932	907.944	826.387	1106.54	656.13	775.405	647.361	312.073	768.366	393.482	356.524
259	ENSG00000130940	CASZ1	protein_coding	213.758	-1.01858	0.357	-2.85317	0.00432849	0.0553411	230.324	319.964	243.791	307.508	140.451	83.1271	130.909	170.574	145.686	74.2759
15436	ENSG00000168913	ENHO	protein_coding	37.619	-2.27373	0.797024	-2.85277	0.00433398	0.0553759	22.5317	24.6126	7.72823	14.5616	45.3539	4.41383	0	12.5192	1.95115	12.3793
18423	ENSG00000148516	ZEB1	protein_coding	131.13	1.57333	0.552312	2.84862	0.00439094	0.0560679	29.2078	174.526	48.4771	107.927	35.1127	180.967	406.998	156.49	347.955	54.469
10211	ENSG00000204564	C6orf136	protein_coding	312.436	-1.08596	0.381315	-2.84794	0.00440025	0.0561509	463.152	211.072	238.873	220.994	519.375	114.024	89.9614	160.402	135.93	334.242
2035	ENSG00000169242	EFNA1	protein_coding	659.305	1.18417	0.415899	2.84725	0.00440994	0.0562387	501.539	273.722	565.566	364.897	408.185	1398.45	859.287	650.998	750.543	1027.48
5266	ENSG00000144476	ACKR3	protein_coding	127.464	2.02588	0.71176	2.84629	0.00442313	0.0563575	15.8556	97.7046	40.0463	107.071	17.5564	146.392	269.884	370.099	373.971	39.6138
14113	ENSG00000173295	FAM86B3P	transcribed_unprocessed_pseudogene	30.9011	-1.33493	0.469028	-2.84617	0.00442489	0.0563575	82.6163	34.3085	25.2924	39.4021	55.5951	16.184	21.0944	20.3437	9.75576	24.7586
4816	ENSG00000138378	STAT4	protein_coding	38.8854	1.0938	0.384357	2.84579	0.0044301	0.056388	12.5176	12.6792	13.3488	17.1313	5.85212	31.6324	19.2331	29.7331	35.7711	17.3311
19521	ENSG00000010295	IFFO1	protein_coding	109.1	1.16184	0.408374	2.84504	0.00444058	0.0564854	22.5317	111.13	54.8002	76.2345	45.3539	169.932	116.019	128.322	235.439	49.5173
19481	ENSG00000118971	CCND2	protein_coding	795.997	-0.928375	0.326472	-2.84366	0.0044599	0.0566952	1427.01	1000.91	1549.86	1440.75	709.569	519.36	675.641	841.134	877.368	324.338
1882	ENSG00000143437	ARNT	protein_coding	272.745	-0.683138	0.240308	-2.84276	0.00447254	0.0568149	267.042	340.847	446.832	382.885	277.976	184.645	276.709	201.872	228.935	175.786
2242	ENSG00000162747	FCGR3B	protein_coding	36.0469	3.14671	1.10699	2.84258	0.004475	0.0568149	1.66902	12.6792	4.2154	127.628	0	34.575	92.4431	129.887	57.8842	37.138
616	ENSG00000158156	XKR8	protein_coding	68.3658	-0.890023	0.31313	-2.84234	0.00447834	0.0568213	122.673	73.092	89.226	65.0991	105.338	63.2648	37.8458	51.6417	49.4292	42.0897
13769	ENSG00000268104	SLC6A14	protein_coding	82.6032	2.34171	0.824366	2.84062	0.00450264	0.0570934	24.2007	110.384	22.4821	43.6849	14.6303	106.667	145.179	464.775	161.946	49.5173
32605	ENSG00000182871	COL18A1	protein_coding	749.517	1.55063	0.54604	2.83977	0.00451456	0.0572083	222.814	349.052	212.175	402.586	749.071	877.616	1026.18	847.393	2643.81	225.304
10800	ENSG00000135324	MRAP2	protein_coding	93.799	-1.45304	0.511835	-2.83889	0.00452711	0.057331	166.067	173.034	102.575	177.309	172.637	135.357	13.6493	86.8519	54.6323	44.5656
18601	ENSG00000099290	WASHC2A	protein_coding	451.295	-0.711202	0.250621	-2.83776	0.00454312	0.0574973	425.599	827.133	621.771	507.944	437.446	333.244	413.823	296.549	418.197	240.159
18586	ENSG00000165633	VSTM4	protein_coding	76.3924	1.3884	0.489465	2.83656	0.00456028	0.0576416	10.0141	63.3961	30.9129	45.398	30.7236	71.3569	121.603	62.596	163.897	29.7104
25491	ENSG00000157368	IL34	protein_coding	53.5086	1.08367	0.382012	2.83675	0.00455758	0.0576416	16.6902	15.6626	9.13337	34.2627	35.1127	19.8622	39.7071	38.34	74.1438	49.5173
23338	ENSG00000140326	CDAN1	protein_coding	141.245	-0.851517	0.300375	-2.83484	0.00458483	0.0579154	178.585	130.521	159.483	184.162	282.365	80.9201	113.538	90.7642	104.061	108.938
6522	ENSG00000154917	RAB6B	protein_coding	17.3026	1.49943	0.529018	2.83437	0.00459168	0.0579653	20.8627	3.72918	6.3231	14.5616	2.92606	20.5979	26.0578	17.2139	36.4215	19.8069
22790	ENSG00000182218	HHIPL1	protein_coding	17.2478	2.33588	0.824209	2.83409	0.00459563	0.0579786	0.834508	11.9334	4.2154	0.856567	5.85212	31.6324	40.3275	6.2596	50.0796	7.42759
17298	ENSG00000173338	KCNK7	protein_coding	16.1858	-2.99107	1.05582	-2.83294	0.00461225	0.0581516	23.3662	2.23751	3.51283	2.5697	99.486	0	1.24085	2.34735	1.95115	2.47586
23243	ENSG00000248508	SRP14-AS1	lincRNA	22.9027	-1.2568	0.443779	-2.83204	0.0046252	0.0582781	37.5528	32.8168	37.9386	41.1152	24.8715	11.7702	9.92678	14.8665	22.7634	14.8552
6423	ENSG00000114554	PLXNA1	protein_coding	308.426	0.762843	0.269431	2.83131	0.00463573	0.0583517	285.402	293.114	267.678	283.524	250.178	564.97	613.599	360.709	441.611	415.945
15408	ENSG00000165271	NOL6	protein_coding	244.172	0.794694	0.280688	2.83123	0.00463688	0.0583517	216.138	243.143	199.529	271.532	127.284	441.383	592.505	327.847	318.688	222.828
1268	ENSG00000154027	AK5	protein_coding	5.05445	3.32514	1.17487	2.83022	0.00465153	0.0584626	0	1.49167	0	0	1.46303	0.735638	11.1676	2.34735	9.10538	4.95173
28161	ENSG00000134779	TPGS2	protein_coding	233.978	-0.714812	0.252558	-2.83029	0.00465062	0.0584626	326.293	289.385	425.053	346.053	269.197	243.496	179.923	194.048	182.758	212.924
13466	ENSG00000155659	VSIG4	protein_coding	77.7866	1.89158	0.668628	2.82904	0.00466874	0.058642	3.33803	42.5127	39.3437	28.2667	1.46303	163.312	47.1522	103.283	104.061	12.3793
2296	ENSG00000143167	GPA33	protein_coding	1939.45	-1.18056	0.417378	-2.82853	0.00467629	0.0587001	2093.78	2269.58	2897.38	1815.92	1803.92	668.695	943.044	2057.84	674.448	784.849
5335	ENSG00000006607	FARP2	protein_coding	398.652	-0.712558	0.251941	-2.82828	0.00467993	0.0587089	500.705	610.84	550.11	605.593	389.166	431.084	395.83	369.316	262.105	212.924
16938	ENSG00000175274	TP53I11	protein_coding	635.452	-0.969022	0.342749	-2.82721	0.00469562	0.0588689	717.677	796.554	1119.19	765.771	898.3	244.232	684.948	607.964	736.885	183.214
12678	ENSG00000226380	AC016831.1	lincRNA	9.64471	2.50078	0.884753	2.82653	0.00470548	0.0589556	2.50352	7.45837	0.702567	1.71313	14.6303	25.7473	12.4085	8.60695	24.7146	27.2345
18954	ENSG00000119938	PPP1R3C	protein_coding	11.1921	2.11243	0.748192	2.82339	0.00475193	0.059463	4.17254	9.69588	2.81027	3.42627	1.46303	30.8968	37.8458	4.6947	29.2673	0
19196	ENSG00000214413	BBIP1	protein_coding	583.701	-1.339	0.474237	-2.82348	0.00475047	0.059463	586.659	340.102	444.022	418.861	683.235	292.784	148.281	249.602	253.65	56.9449
23235	ENSG00000276107	AC037198.1	sense_intronic	4.47785	3.88871	1.37764	2.82273	0.00476174	0.0595485	0	0	0.702567	1.71313	0	0.735638	16.131	3.1298	7.80461	17.3311
12985	ENSG00000239911	PRKAG2-AS1	antisense	27.5589	-1.7825	0.631673	-2.82187	0.00477439	0.0596651	40.0564	14.1709	25.995	35.1192	46.8169	11.7702	3.10212	24.2559	11.7069	2.47586
23757	ENSG00000260173	AC020779.2	antisense	3.92245	-2.78648	0.987584	-2.82151	0.0047798	0.0596651	5.84155	13.4251	9.83593	4.28283	1.46303	0.735638	2.48169	2.34735	0	0
29175	ENSG00000101187	SLCO4A1	protein_coding	270.937	1.23335	0.437127	2.8215	0.00478001	0.0596651	302.092	162.592	167.913	192.728	223.843	807.73	867.973	107.196	364.215	564.497
7833	ENSG00000138796	HADH	protein_coding	944.189	-0.893146	0.316593	-2.82112	0.00478563	0.0596981	1173.32	974.063	1301.15	884.834	1002.18	473.015	362.948	756.629	478.032	829.415
19055	ENSG00000120053	GOT1	protein_coding	491.81	-0.871158	0.308902	-2.82017	0.00479978	0.0598373	733.532	565.344	509.361	414.578	624.713	299.405	204.119	290.289	324.542	430.8
16137	ENSG00000167081	PBX3	protein_coding	55.5401	1.46684	0.520303	2.81921	0.00481422	0.0599799	15.8556	30.5793	42.154	46.2546	8.77818	97.8398	91.2023	46.947	181.457	22.2828
1392	ENSG00000162676	GFI1	protein_coding	46.1869	-1.92941	0.684457	-2.81889	0.00481906	0.0600029	49.236	94.7213	85.0106	152.469	19.0194	33.8393	19.2331	33.6453	16.91	7.42759
16471	ENSG00000185201	IFITM2	protein_coding	568.466	0.875869	0.310754	2.81853	0.00482438	0.0600318	622.543	399.023	259.95	573.043	526.691	1662.54	885.345	695.598	831.841	510.028
9461	ENSG00000183876	ARSI	protein_coding	21.5035	2.52576	0.896363	2.81778	0.00483563	0.0601343	2.50352	5.96669	2.1077	7.7091	1.46303	13.2415	58.9402	0.78245	55.2826	9.90346
23665	ENSG00000138615	CILP	protein_coding	38.577	2.79961	0.993857	2.81692	0.00484868	0.0602592	1.66902	2.23751	10.5385	3.42627	0	2.94255	65.7649	7.04205	156.743	0
7569	ENSG00000171234	UGT2B7	protein_coding	56.5998	-2.1341	0.757934	-2.81568	0.0048674	0.0604543	42.5599	14.9167	63.231	85.6567	45.3539	0	4.96339	29.7331	12.3573	9.90346
17631	ENSG00000137474	MYO7A	protein_coding	51.2522	1.0295	0.365689	2.81524	0.00487409	0.060466	22.5317	39.5294	41.4514	40.2586	32.1866	55.9085	133.391	39.1225	87.1515	64.3725
18078	ENSG00000019102	VSIG2	protein_coding	1970.81	-2.53206	0.899419	-2.81522	0.00487439	0.060466	2622.86	1000.91	1216.14	847.145	4748.99	404.601	8.68593	767.583	295.925	641.249
31357	ENSG00000099725	PRKY	transcribed_unprocessed_pseudogene	106.278	-1.33676	0.475171	-2.81322	0.00490481	0.0608057	189.433	0	259.247	306.651	118.505	212.599	0	115.803	61.7865	24.7586
14964	ENSG00000170961	HAS2	protein_coding	52.7984	1.26218	0.448881	2.81185	0.00492579	0.0609902	7.51057	41.021	62.5284	36.8324	10.2412	47.0808	137.734	90.7642	69.5911	19.8069
28951	ENSG00000124102	PI3	protein_coding	1992.66	1.67985	0.597387	2.812	0.00492349	0.0609902	686.8	1434.24	280.324	1143.52	1331.36	2728.48	1245.19	1991.34	1704.66	12149.1
15155	ENSG00000178719	GRINA	protein_coding	829.293	1.00888	0.358866	2.81131	0.00493401	0.0610542	867.888	414.685	328.801	332.348	934.876	845.983	1038.59	821.572	932.651	1943.55
24694	ENSG00000133392	MYH11	protein_coding	1669.54	1.72996	0.615543	2.81046	0.00494709	0.0611782	116.831	822.658	862.752	501.948	311.625	1724.33	1824.05	1172.89	6911.63	217.876
5107	ENSG00000116106	EPHA4	protein_coding	64.5132	-1.55907	0.554974	-2.80926	0.00496554	0.0613685	80.9473	145.438	170.724	143.903	26.3345	39.7244	17.9923	56.3364	31.2184	22.2828
25215	ENSG00000260135	MMP2-AS1	lincRNA	8.96752	2.82051	1.00485	2.8069	0.00500203	0.0617745	3.33803	1.49167	0	1.71313	0	41.9313	3.10212	1.5649	25.365	0
32520	ENSG00000160183	TMPRSS3	protein_coding	57.6588	1.81706	0.647392	2.80674	0.00500457	0.0617745	20.8627	27.596	17.5642	60.8162	21.9454	60.3223	194.813	101.718	263.406	24.7586
2029	ENSG00000163354	DCST2	protein_coding	32.9506	-1.458	0.519609	-2.80595	0.00501688	0.0618883	31.7113	20.1376	13.3488	20.5576	67.2993	15.4484	4.34297	7.8245	11.7069	9.90346
22831	ENSG00000271780	AL118558.3	lincRNA	16.8951	-1.49601	0.533302	-2.80519	0.00502872	0.061996	17.5247	15.6626	17.5642	15.4182	29.2606	8.82765	2.48169	2.34735	9.75576	17.3311
31132	ENSG00000239998	LILRA2	protein_coding	7.19907	2.84947	1.01616	2.80415	0.005045	0.0621586	0	4.47502	0.702567	8.56567	0	4.41383	10.5472	18.7788	11.0565	7.42759
15696	ENSG00000106772	PRUNE2	protein_coding	245.623	-1.83103	0.653165	-2.80331	0.00505803	0.0622782	183.592	600.399	421.54	893.399	58.5212	470.808	110.435	60.2486	148.288	42.0897
25929	ENSG00000132361	CLUH	protein_coding	1807.85	-1.12431	0.40109	-2.80313	0.00506094	0.0622782	2383.35	1035.22	1114.27	971.347	4541.24	629.706	668.817	599.357	642.579	1775.19
16640	ENSG00000170955	CAVIN3	protein_coding	181.814	1.65493	0.59047	2.80273	0.00506722	0.0623172	44.2289	80.5504	54.0976	47.9677	257.493	222.898	254.374	180.746	636.726	126.269
26731	ENSG00000277363	SRCIN1	protein_coding	36.7096	1.40388	0.501165	2.80123	0.00509089	0.0625697	25.0352	11.1876	29.5078	15.4182	24.8715	31.6324	55.2177	84.5046	55.933	56.9449
12267	ENSG00000127990	SGCE	protein_coding	58.1051	1.59584	0.569814	2.80064	0.00510012	0.0626448	10.0141	73.8379	39.3437	42.8283	4.38909	46.3452	93.0636	102.501	171.051	29.7104
16987	ENSG00000066336	SPI1	protein_coding	127.213	1.10033	0.393047	2.79949	0.00511831	0.0628297	38.3874	99.1963	58.313	70.2385	61.4472	168.461	127.807	135.364	178.205	99.0346
30707	ENSG00000177464	GPR4	protein_coding	18.2774	1.8715	0.668742	2.79853	0.00513355	0.0629781	19.1937	10.4417	4.2154	7.7091	23.4085	26.483	57.079	32.8629	49.4292	14.8552
24804	ENSG00000140743	CDR2	protein_coding	168.002	1.29394	0.462409	2.79826	0.00513792	0.0629931	72.6022	143.201	168.616	116.493	43.8909	264.094	331.927	227.693	434.457	101.51
29940	ENSG00000072954	TMEM38A	protein_coding	60.7675	-1.56841	0.560547	-2.798	0.00514199	0.0630043	113.493	39.5294	51.2874	47.9677	131.673	13.9771	20.474	26.6033	46.1773	27.2345
8849	ENSG00000113319	RASGRF2	protein_coding	39.2007	1.59395	0.569842	2.79717	0.00515517	0.0630885	13.3521	44.0044	6.3231	17.1313	24.8715	64.0005	73.21	53.2066	79.3469	17.3311
22853	ENSG00000205436	EXOC3L4	protein_coding	388.546	-1.53307	0.548077	-2.79718	0.00515507	0.0630885	206.123	176.763	99.0619	113.067	744.682	89.0122	35.3641	103.283	48.7788	126.269
30061	ENSG00000250067	YJEFN3	protein_coding	240.734	-1.53583	0.549185	-2.79656	0.00516492	0.0631692	183.592	104.417	100.467	128.485	346.738	43.4026	25.4374	53.2066	87.1515	113.89
404	ENSG00000127463	EMC1	protein_coding	413.242	-0.727524	0.260181	-2.79622	0.00517041	0.0631977	520.733	375.902	511.468	395.734	719.81	262.623	285.395	266.815	322.591	349.097
15654	ENSG00000135063	FAM189A2	protein_coding	20.4122	-1.87762	0.671806	-2.79488	0.00519185	0.0634211	15.0211	38.0377	12.6462	11.9919	14.6303	1.47128	4.96339	16.4314	9.10538	0
24141	ENSG00000258754	LINC01579	lincRNA	3.40993	4.309	1.54196	2.79449	0.0051981	0.0634587	0	0.745837	0	0	1.46303	20.5979	9.92678	2.34735	7.15423	0
31938	ENSG00000100116	GCAT	protein_coding	444.128	-1.71466	0.613768	-2.79366	0.0052115	0.0635834	865.385	143.201	217.796	232.986	1398.66	109.61	116.019	71.9854	133.329	259.966
29695	ENSG00000130164	LDLR	protein_coding	331.685	1.2643	0.4526	2.79341	0.00521554	0.063594	93.4649	356.51	179.154	268.962	165.322	614.993	692.393	478.859	521.608	334.242
17851	ENSG00000110723	EXPH5	protein_coding	153.56	-1.23585	0.442503	-2.79286	0.0052245	0.0636144	224.483	152.151	214.985	226.134	200.435	69.8856	63.9036	137.711	47.478	151.028
18072	ENSG00000154144	TBRG1	protein_coding	366.6	-0.628444	0.22503	-2.79272	0.00522675	0.0636144	549.106	566.09	400.463	538.781	335.034	331.773	319.518	328.629	325.842	222.828
26732	ENSG00000273604	EPOP	protein_coding	47.1447	1.7111	0.612648	2.79296	0.00522279	0.0636144	37.5528	12.6792	28.1027	13.7051	33.6497	39.7244	44.0501	129.887	31.2184	287.2
28398	ENSG00000060069	CTDP1	protein_coding	260.862	-0.699836	0.250628	-2.79233	0.00523299	0.0636516	396.391	254.33	335.827	318.643	310.162	220.691	209.703	186.223	188.611	185.69
20265	ENSG00000123353	ORMDL2	protein_coding	454.587	-1.18853	0.425734	-2.79172	0.00524291	0.0637335	1023.11	511.644	403.273	369.18	904.152	496.555	201.638	347.408	245.845	131.221
18313	ENSG00000148468	FAM171A1	protein_coding	343.15	-0.767555	0.274992	-2.79119	0.00525142	0.0637982	332.134	413.939	412.407	409.439	513.523	228.048	227.075	395.137	191.863	190.642
31759	ENSG00000183762	KREMEN1	protein_coding	221.08	-1.33447	0.478248	-2.79033	0.00526551	0.0639306	287.071	498.965	334.422	589.318	149.229	278.071	186.748	212.826	116.419	42.0897
12282	ENSG00000231764	DLX6-AS1	antisense	9.04931	-4.40547	1.57895	-2.79012	0.00526881	0.0639319	73.4367	1.49167	4.2154	18.8445	19.0194	0.735638	0	17.9963	0	0
5396	ENSG00000125046	SSUH2	protein_coding	18.4608	2.38309	0.854244	2.78971	0.00527547	0.0639739	10.8486	5.22086	0.702567	8.56567	5.85212	10.2989	25.4374	13.3016	52.6811	34.6621
431	ENSG00000162543	UBXN10	protein_coding	85.1446	-1.86217	0.667648	-2.78916	0.00528453	0.0640444	204.454	88.7546	137	113.067	92.1708	0.735638	78.7938	44.5996	37.7223	44.5656
19278	ENSG00000203805	PLPP4	protein_coding	15.1382	8.01271	2.873	2.78896	0.00528769	0.0640444	0	0	0	0	0	64.0005	77.553	3.1298	76.7453	0
5967	ENSG00000162267	ITIH3	protein_coding	8.66271	2.92749	1.04989	2.78837	0.00529737	0.0640987	0.834508	2.98335	0.702567	0.856567	1.46303	25.0117	3.10212	7.8245	18.2108	0
26848	ENSG00000173805	HAP1	protein_coding	10.1945	2.16287	0.775695	2.7883	0.00529858	0.0640987	1.66902	2.23751	2.1077	1.71313	1.46303	2.20691	9.30636	8.60695	3.9023	37.138
27090	ENSG00000141293	SKAP1	protein_coding	55.9368	1.70703	0.612398	2.78744	0.00531257	0.0641903	24.2007	22.3751	17.5642	21.4142	27.7976	193.473	62.0424	81.3748	15.6092	49.5173
29113	ENSG00000124256	ZBP1	protein_coding	134.092	1.59058	0.570617	2.78748	0.00531203	0.0641903	10.8486	111.13	25.2924	29.1233	87.7818	151.541	173.719	108.761	79.3469	86.6553
16345	ENSG00000107147	KCNT1	protein_coding	6.96811	3.28202	1.17782	2.78652	0.00532776	0.0642259	2.50352	0.745837	0	0.856567	0	1.47128	8.06551	0	26.6657	44.5656
22228	ENSG00000125375	ATP5S	protein_coding	175.676	-0.755621	0.271156	-2.78667	0.0053253	0.0642259	199.447	257.314	232.55	232.13	215.065	128.001	119.742	167.444	141.133	116.366
25882	ENSG00000236618	PITPNA-AS1	antisense	50.4087	-1.56404	0.561255	-2.78668	0.00532502	0.0642259	110.99	38.0377	60.4207	41.1152	95.0969	31.6324	18.6127	26.6033	45.5269	2.47586
26777	ENSG00000073605	GSDMB	protein_coding	996.364	-0.988758	0.354841	-2.78648	0.00532835	0.0642259	1615.61	1126.96	647.064	998.757	1521.55	750.35	304.628	917.814	445.513	668.483
18979	ENSG00000148690	FRA10AC1	protein_coding	231.246	-0.955137	0.342803	-2.78626	0.00533204	0.0642317	387.212	166.322	176.344	214.142	469.632	129.472	112.297	74.3327	155.442	269.869
5895	ENSG00000012171	SEMA3B	protein_coding	1056.48	-1.05842	0.380032	-2.78507	0.0053517	0.0643264	1523.81	462.419	670.951	508.801	2725.62	222.898	234.52	453.039	598.353	1136.42
6046	ENSG00000163630	SYNPR	protein_coding	5.7349	4.98997	1.7915	2.78536	0.00534691	0.0643264	0	0	0	0	0	52.9659	0.620424	27.3857	0.650384	0
21343	ENSG00000132965	ALOX5AP	protein_coding	116.038	1.23538	0.443547	2.78522	0.0053491	0.0643264	50.0705	82.7879	47.7745	42.8283	93.6339	205.979	163.792	120.497	224.383	44.5656
21436	ENSG00000120659	TNFSF11	protein_coding	15.7019	2.51884	0.904473	2.78487	0.00535494	0.0643264	0.834508	7.45837	5.62053	36.8324	0	27.9542	28.5395	43.0347	61.1361	4.95173
32598	ENSG00000197381	ADARB1	protein_coding	75.1541	1.06074	0.380903	2.78481	0.00535598	0.0643264	54.243	76.8212	39.3437	73.6647	26.3345	72.0925	143.318	82.9397	114.468	123.793
27851	ENSG00000176890	TYMS	protein_coding	283.724	-1.02962	0.369791	-2.78434	0.00536373	0.0643809	442.289	343.085	616.853	637.286	219.454	169.197	161.931	377.923	222.431	165.883
6338	ENSG00000113924	HGD	protein_coding	110.513	-1.19224	0.428352	-2.78332	0.00538057	0.0645443	214.468	93.2296	115.221	103.645	79.0036	125.794	16.7514	101.718	27.3161	34.6621
23887	ENSG00000183476	SH2D7	protein_coding	99.5557	-2.3705	0.851741	-2.78312	0.00538385	0.0645449	32.5458	49.2252	9.13337	18.8445	152.155	7.35638	2.48169	19.5612	13.0077	0
26384	ENSG00000108602	ALDH3A1	protein_coding	150.652	-1.9774	0.710644	-2.78254	0.00539348	0.0646216	332.969	78.3129	167.211	84.8001	626.177	122.116	11.788	46.947	122.272	29.7104
9622	ENSG00000113719	ERGIC1	protein_coding	1394.65	-0.711085	0.255612	-2.78189	0.00540433	0.0647129	1870.97	1455.87	2300.2	1824.49	1226.02	1387.41	884.104	1377.89	1039.31	675.911
26321	ENSG00000177427	MIEF2	protein_coding	85.9876	-0.868342	0.312329	-2.78021	0.00543233	0.0650092	105.982	87.2629	96.9542	88.2264	125.821	52.9659	51.4952	50.8592	53.9819	66.8483
17379	ENSG00000173156	RHOD	protein_coding	95.2515	1.6644	0.598708	2.77998	0.00543615	0.0650161	40.8909	34.3085	25.2924	5.1394	96.5599	42.667	111.676	69.638	123.573	371.38
18555	ENSG00000204177	BMS1P1	transcribed_unprocessed_pseudogene	16.4642	-1.76215	0.634063	-2.77914	0.00545027	0.065146	12.5176	44.0044	30.2104	40.2586	21.9454	8.09201	15.5106	3.91225	9.75576	9.90346
24776	ENSG00000103316	CRYM	protein_coding	82.5699	-1.58107	0.569058	-2.7784	0.00546269	0.0652555	166.902	149.913	257.139	136.194	84.8557	103.725	13.6493	39.9049	53.9819	42.0897
26012	ENSG00000129250	KIF1C	protein_coding	1408.44	-0.839116	0.302051	-2.77806	0.00546849	0.0652858	2012	1420.07	1246.35	1260.87	2689.05	617.2	867.352	1179.93	1109.56	1032.44
29829	ENSG00000267519	AC020916.1	lincRNA	502.815	1.45843	0.525079	2.77755	0.00547705	0.065349	244.511	92.4838	91.3337	291.233	478.411	332.508	681.846	673.689	699.163	958.16
409	ENSG00000053371	AKR7A2	protein_coding	553.583	-0.871795	0.313945	-2.77691	0.00548789	0.0653665	782.768	425.873	630.905	389.738	890.985	303.083	191.711	348.19	303.079	616.49
16718	ENSG00000133800	LYVE1	protein_coding	40.2376	2.16702	0.780365	2.77693	0.00548746	0.0653665	2.50352	6.71253	10.5385	5.99597	0	11.7702	28.5395	25.0384	40.3238	4.95173
24898	ENSG00000196502	SULT1A1	protein_coding	1127.22	-1.09242	0.393398	-2.77688	0.00548832	0.0653665	394.722	912.158	258.545	210.715	1982.4	110.346	209.083	227.693	258.853	873.98
18055	ENSG00000200879	SNORD14E	snoRNA	5.30002	2.38913	0.860475	2.77653	0.00549423	0.065398	1.66902	2.98335	3.51283	4.28283	0	8.09201	11.1676	11.7367	21.4627	12.3793
4849	ENSG00000162944	RFTN2	protein_coding	21.679	1.4258	0.513601	2.77609	0.00550176	0.0654098	3.33803	20.8834	10.5385	15.4182	10.2412	16.9197	35.3641	38.34	48.1284	12.3793
17179	ENSG00000185670	ZBTB3	protein_coding	49.0212	-1.36845	0.492911	-2.77627	0.00549859	0.0654098	87.6233	38.7835	37.236	42.8283	117.042	10.2989	18.6127	22.691	20.8123	71.8001
18700	ENSG00000156510	HKDC1	protein_coding	272.041	2.0562	0.741012	2.77485	0.0055227	0.0656198	148.542	177.509	40.7489	59.1031	96.5599	244.232	634.073	269.163	329.094	289.676
11079	ENSG00000118507	AKAP7	protein_coding	101.889	-1.65113	0.595249	-2.77385	0.00553973	0.0657831	169.405	104.417	225.524	77.091	118.505	35.3106	24.1965	125.192	44.8765	19.8069
8678	ENSG00000229666	MAST4-AS1	antisense	4.84362	-2.75334	0.992895	-2.77304	0.00555349	0.0659074	7.51057	1.49167	18.2667	9.42224	23.4085	0	1.24085	2.34735	1.30077	2.47586
14378	ENSG00000253123	AC091182.1	processed_transcript	8.12476	2.73564	0.986604	2.77278	0.00555793	0.065921	0.834508	1.49167	1.40513	0.856567	0	3.67819	2.48169	10.9543	21.4627	0
23413	ENSG00000137860	SLC28A2	protein_coding	291.93	-2.70199	0.974538	-2.77259	0.00556125	0.0659212	134.356	711.528	951.978	491.669	46.8169	0.735638	0.620424	297.331	42.275	66.8483
31228	ENSG00000166770	ZNF667-AS1	lincRNA	12.4967	2.21366	0.798673	2.77168	0.00557685	0.066067	1.66902	12.6792	5.62053	1.71313	0	20.5979	18.6127	6.2596	47.478	2.47586
14818	ENSG00000104324	CPQ	protein_coding	126.492	1.40603	0.507394	2.77107	0.00558716	0.06615	29.2078	107.401	84.308	71.9516	20.4824	218.484	124.085	230.04	248.447	34.6621
16614	ENSG00000180785	OR51E1	protein_coding	11.0969	2.52401	0.911309	2.76966	0.00561154	0.0662883	0.834508	13.4251	1.40513	1.71313	4.38909	37.5175	37.8458	16.4314	20.1619	7.42759
18334	ENSG00000260314	MRC1	protein_coding	133.818	1.74409	0.62971	2.76968	0.00561122	0.0662883	8.34508	112.621	62.5284	54.8203	8.77818	186.116	230.177	156.49	148.938	59.4207
21506	ENSG00000136146	MED4	protein_coding	259.173	1.00121	0.361498	2.76962	0.00561209	0.0662883	226.986	195.409	274.704	228.703	98.023	570.855	395.21	284.812	385.027	346.621
29428	ENSG00000105289	TJP3	protein_coding	945.398	-0.820947	0.296384	-2.76988	0.00560778	0.0662883	1129.92	686.916	735.587	666.409	1360.62	436.969	544.112	730.808	325.192	559.545
2874	ENSG00000185495	AC138393.1	transcribed_unprocessed_pseudogene	46.8265	-1.0557	0.381236	-2.76914	0.00562039	0.066308	36.7183	60.4128	44.2617	65.9556	59.9842	37.5175	24.8169	10.1718	33.1696	27.2345
17427	ENSG00000255031	AP002807.1	antisense	158.235	-1.66029	0.599565	-2.76917	0.00561997	0.066308	374.694	158.117	171.426	180.736	204.824	90.4834	68.867	138.494	114.468	0
20845	ENSG00000234608	MAPKAPK5-AS1	lincRNA	327.606	-1.04785	0.378511	-2.76836	0.00563389	0.066389	580.817	255.076	332.314	356.332	664.215	199.358	160.69	205.784	169.75	316.911
30834	ENSG00000063180	CA11	protein_coding	43.9803	1.49044	0.538379	2.76838	0.00563351	0.066389	9.17959	4.47502	2.81027	11.1354	30.7236	16.9197	15.5106	37.5576	30.5681	29.7104
24089	ENSG00000196391	ZNF774	protein_coding	64.1253	-1.08706	0.392902	-2.76676	0.00566166	0.066677	85.1198	107.401	173.534	79.6607	80.4666	44.8739	91.8227	60.2486	26.0154	39.6138
15588	ENSG00000238113	LINC01410	lincRNA	11.0326	2.49141	0.90073	2.76599	0.00567508	0.0667957	2.50352	23.8668	4.2154	1.71313	0	25.0117	16.131	21.1261	14.3085	19.8069
9411	ENSG00000113657	DPYSL3	protein_coding	378.944	1.4489	0.523945	2.76537	0.00568591	0.066818	142.701	320.71	116.626	220.994	187.268	1015.18	849.98	250.384	1059.48	79.2277
20913	ENSG00000088992	TESC	protein_coding	113.334	1.29875	0.469691	2.76511	0.00569033	0.066818	117.666	29.8335	63.9336	53.1071	196.046	416.371	98.6474	252.731	81.298	220.352
26266	ENSG00000181350	LRRC75A	protein_coding	3238.64	-1.96294	0.709796	-2.7655	0.00568364	0.066818	6583.43	850.254	1895.52	1197.48	13433.5	1332.24	509.368	1254.27	809.728	153.504
29044	ENSG00000277449	CEBPB-AS1	antisense	28.377	1.74212	0.630017	2.7652	0.00568884	0.066818	8.34508	18.6459	21.7796	26.5536	1.46303	16.184	127.187	42.2523	99.5088	9.90346
1283	ENSG00000122420	PTGFR	protein_coding	14.1264	2.94595	1.06547	2.76492	0.00569369	0.0668182	1.66902	2.98335	8.4308	7.7091	0	3.67819	58.9402	21.1261	43.5757	12.3793
5524	ENSG00000154822	PLCL2	protein_coding	109.201	-1.23776	0.447721	-2.76458	0.00569965	0.0668489	60.9191	122.317	118.734	119.919	118.505	40.4601	16.7514	89.1993	61.7865	34.6621
20326	ENSG00000025423	HSD17B6	protein_coding	27.1466	1.78377	0.645386	2.76388	0.00571189	0.0669533	4.17254	21.6293	40.7489	18.8445	1.46303	45.6095	40.3275	29.7331	93.6553	19.8069
21001	ENSG00000274292	AC084018.2	lincRNA	34.1192	-1.51097	0.546782	-2.76338	0.00572054	0.0670154	22.5317	87.2629	46.3694	113.923	5.85212	17.6553	34.1233	19.5612	20.1619	2.47586
15405	ENSG00000165269	AQP7	protein_coding	110.473	-1.36722	0.494909	-2.76256	0.00573495	0.0670664	99.3064	32.071	113.113	61.6728	87.7818	10.2989	57.6994	32.0804	31.2184	19.8069
29827	ENSG00000132003	ZSWIM4	protein_coding	81.2831	1.20516	0.436225	2.76269	0.00573265	0.0670664	41.7254	60.4128	82.2003	77.091	29.2606	144.185	232.038	86.0695	198.367	44.5656
32492	ENSG00000183036	PCP4	protein_coding	20.1098	2.08218	0.753653	2.76279	0.00573101	0.0670664	12.5176	17.9001	9.83593	10.2788	1.46303	27.9542	9.92678	26.6033	148.938	27.2345
20122	ENSG00000050438	SLC4A8	protein_coding	40.0275	-1.21694	0.440684	-2.76147	0.00575416	0.0672435	52.574	107.401	77.2823	85.6567	64.3733	32.3681	34.7437	40.6874	26.0154	32.1862
32283	ENSG00000155307	SAMSN1	protein_coding	55.9613	1.89788	0.687309	2.76132	0.00575682	0.0672435	18.3592	58.9211	21.077	44.5415	0	128.737	74.4508	93.1115	78.6965	22.2828
2377	ENSG00000117586	TNFSF4	protein_coding	21.1808	3.22338	1.16796	2.75985	0.00578277	0.0674285	0	3.72918	1.40513	7.7091	10.2412	69.8856	62.0424	28.1682	101.46	0
9410	ENSG00000169302	STK32A	protein_coding	3.2338	4.48469	1.62487	2.76003	0.00577961	0.0674285	0	1.49167	0	0	0	13.2415	1.86127	15.649	7.80461	0
24569	ENSG00000103184	SEC14L5	protein_coding	6.26142	-3.59069	1.30099	-2.75996	0.0057808	0.0674285	2.50352	0.745837	6.3231	1.71313	5.85212	0	0	0	0.650384	0
23816	ENSG00000140497	SCAMP2	protein_coding	950.007	-0.621578	0.225301	-2.75888	0.0058	0.0675901	1029.78	1137.4	1288.51	1178.64	848.557	660.603	731.48	947.547	665.343	576.876
6248	ENSG00000144824	PHLDB2	protein_coding	72.5565	1.47318	0.534308	2.75717	0.00583046	0.067866	19.1937	67.8712	42.8566	83.087	11.7042	89.0122	169.376	219.868	141.784	22.2828
19264	ENSG00000119979	FAM45A	protein_coding	140.286	-0.826613	0.299793	-2.75728	0.00582848	0.067866	163.564	204.359	177.047	169.6	179.953	69.8856	134.632	115.02	126.825	71.8001
2846	ENSG00000136630	HLX	protein_coding	79.5425	1.44258	0.524247	2.75171	0.00592848	0.0689668	32.5458	32.8168	20.3744	21.4142	61.4472	104.461	69.4875	57.1188	167.799	47.0414
24175	ENSG00000182253	SYNM	protein_coding	111.032	1.40828	0.511859	2.75131	0.00593581	0.069012	50.0705	57.4294	27.4001	50.5374	35.1127	83.8627	169.996	51.6417	573.639	29.7104
13627	ENSG00000102359	SRPX2	protein_coding	285.408	1.28339	0.466774	2.74949	0.00596886	0.0693176	291.243	85.7712	170.021	160.178	326.256	716.511	525.499	172.921	418.847	552.118
17719	ENSG00000109861	CTSC	protein_coding	1162.47	0.823718	0.299591	2.74948	0.00596903	0.0693176	657.592	1167.98	762.987	974.773	479.874	1341.07	1161.43	1963.17	1639.62	955.684
10306	ENSG00000166278	C2	protein_coding	286.627	1.29611	0.471447	2.74921	0.00597382	0.0693331	142.701	111.13	40.0463	161.891	519.375	432.555	250.031	201.872	323.891	737.808
32467	ENSG00000205622	AP001043.1	lincRNA	37.8384	-1.7881	0.651015	-2.74663	0.00602103	0.0698	70.0986	31.3251	30.9129	29.9798	131.673	13.9771	5.58381	10.9543	5.85346	79.2277
32565	ENSG00000160224	AIRE	protein_coding	7.95749	2.49581	0.908671	2.74666	0.00602053	0.0698	1.66902	0.745837	0.702567	1.71313	0	3.67819	4.96339	2.34735	16.91	4.95173
30545	ENSG00000105329	TGFB1	protein_coding	295.556	1.01509	0.369675	2.74589	0.0060347	0.069918	83.4508	251.347	189.693	221.851	158.007	358.256	461.595	343.496	699.163	121.317
13858	ENSG00000213468	FIRRE	lincRNA	9.12732	2.78834	1.01584	2.74486	0.00605372	0.0700668	0	2.23751	4.91797	5.99597	1.46303	4.41383	53.3564	47.7294	7.15423	7.42759
24889	ENSG00000188603	CLN3	protein_coding	149.087	-1.59442	0.580884	-2.74481	0.00605455	0.0700668	70.9332	251.347	311.94	286.093	130.21	59.5867	58.3198	116.585	75.4446	9.90346
8114	ENSG00000260244	AC104083.1	sense_overlapping	38.7292	2.51792	0.917416	2.74458	0.00605891	0.0700767	1.66902	19.3918	11.2411	9.42224	2.92606	125.794	133.391	21.9086	182.108	0
27101	ENSG00000182742	HOXB4	protein_coding	37.1577	1.36834	0.498628	2.7442	0.00606577	0.0701155	35.0493	29.0876	15.4565	27.4101	7.31515	169.197	29.1599	66.5082	41.6246	27.2345
3586	ENSG00000239605	STPG4	protein_coding	5.77961	4.16502	1.51907	2.74181	0.00611013	0.0705716	0	1.49167	1.40513	0	0	16.184	29.7803	0	13.6581	9.90346
23880	ENSG00000169783	LINGO1	protein_coding	19.8889	1.63995	0.598153	2.7417	0.00611227	0.0705716	15.0211	3.72918	4.2154	7.7091	11.7042	17.6553	14.8902	34.4278	32.5192	32.1862
21239	ENSG00000165480	SKA3	protein_coding	93.3661	1.17771	0.429795	2.74016	0.00614097	0.070862	61.7536	58.9211	87.8208	65.0991	71.6884	111.081	157.588	121.28	98.8584	354.049
6033	ENSG00000198643	FAM3D	protein_coding	12518.5	-1.76793	0.645477	-2.73895	0.00616365	0.0710348	14493.7	3867.16	6204.37	5214.78	26333.1	3408.21	1609.38	3393.49	2732.26	2007.93
7419	ENSG00000248780	ARL4AP2	processed_pseudogene	5.19834	-4.23962	1.54799	-2.73879	0.0061666	0.0710348	17.5247	2.98335	9.13337	0	10.2412	0	0	0.78245	0.650384	2.47586
9807	ENSG00000164379	FOXQ1	protein_coding	165.267	1.41436	0.516391	2.73894	0.00616371	0.0710348	181.923	138.726	90.6311	95.0789	109.727	601.752	519.295	334.106	312.835	76.7518
30352	ENSG00000232677	LINC00665	lincRNA	16.7946	2.1585	0.78843	2.73772	0.0061866	0.0712242	5.00705	24.6126	9.13337	0	1.46303	15.4484	98.6474	17.2139	18.2108	4.95173
5843	ENSG00000178252	WDR6	protein_coding	1243.37	-1.15166	0.420737	-2.73724	0.00619574	0.0712884	2068.74	1425.29	1649.63	1588.07	2103.84	735.638	957.314	1222.19	1153.13	190.642
22001	ENSG00000235194	PPP1R3E	protein_coding	121.17	-0.896477	0.327603	-2.73648	0.00621007	0.0714122	121.838	179.747	139.108	160.178	166.785	102.989	48.393	69.638	120.971	81.7035
1461	ENSG00000162692	VCAM1	protein_coding	112.398	2.23733	0.817841	2.73566	0.0062256	0.0715497	6.67606	90.2463	75.1746	153.325	0	129.472	235.761	245.689	316.737	51.9932
31185	ENSG00000179954	SSC5D	protein_coding	71.1721	1.93501	0.707546	2.73483	0.00624134	0.0716895	3.33803	26.8501	10.5385	6.85253	29.2606	36.7819	102.37	7.8245	127.475	19.8069
18143	ENSG00000149418	ST14	protein_coding	5102.61	-0.971575	0.35539	-2.73383	0.00626032	0.0718662	7761.76	4008.87	3958.96	3164.16	10710.8	2795.42	1804.81	3459.21	1726.77	5503.85
19126	ENSG00000120055	C10orf95	protein_coding	24.9909	-1.31949	0.482751	-2.73326	0.00627102	0.0719477	35.8838	34.3085	47.7745	44.5415	40.9648	11.7702	16.7514	25.0384	27.3161	4.95173
14755	ENSG00000155099	PIP4P2	protein_coding	28.114	1.67029	0.61135	2.73214	0.0062925	0.0721527	18.3592	15.6626	26.6975	37.6889	0	47.0808	55.2177	54.7715	63.0873	24.7586
6830	ENSG00000228221	LINC00578	lincRNA	4.03466	3.71067	1.35881	2.73082	0.00631765	0.0722467	0	0.745837	2.1077	0.856567	0	4.41383	17.9923	2.34735	26.0154	2.47586
8503	ENSG00000145623	OSMR	protein_coding	88.2386	1.90414	0.697177	2.73122	0.00631008	0.0722467	12.5176	105.163	42.154	89.9395	2.92606	133.15	273.607	149.448	251.699	19.8069
11583	ENSG00000006747	SCIN	protein_coding	253.13	-1.65826	0.607197	-2.731	0.00631421	0.0722467	126.011	175.272	204.447	243.265	108.264	46.3452	43.4297	155.708	44.2261	29.7104
15437	ENSG00000230729	AL160270.1	antisense	9.21765	-2.15589	0.789287	-2.73144	0.00630576	0.0722467	5.00705	11.1876	10.5385	6.85253	8.77818	0	1.86127	8.60695	1.95115	0
30817	ENSG00000161558	TMEM143	protein_coding	56.419	-0.841367	0.308107	-2.73077	0.00631874	0.0722467	68.4296	82.7879	59.7182	62.5294	57.0581	33.8393	36.605	30.5155	54.6323	29.7104
4650	ENSG00000091428	RAPGEF4	protein_coding	16.5662	2.31441	0.847662	2.73035	0.00632679	0.0722561	33.3803	22.3751	0.702567	5.1394	0	13.9771	42.1888	33.6453	27.9665	7.42759
14206	ENSG00000078674	PCM1	protein_coding	521.277	-0.816222	0.298939	-2.7304	0.00632572	0.0722561	513.222	767.466	986.403	867.702	340.886	449.475	371.634	477.294	362.914	269.869
25237	ENSG00000205364	MT1M	protein_coding	790.705	-1.45913	0.534564	-2.72957	0.00634166	0.0723847	21.6972	36.546	243.791	61.6728	443.298	8.82765	7.44508	103.283	61.7865	94.0829
3608	ENSG00000243244	STON1	protein_coding	31.368	1.47261	0.539686	2.72864	0.00635961	0.0725481	11.6831	24.6126	22.4821	13.7051	11.7042	72.8281	79.4142	26.6033	63.7376	19.8069
3961	ENSG00000222041	CYTOR	lincRNA	91.6964	1.60834	0.589512	2.72825	0.00636717	0.072593	37.5528	20.1376	8.4308	16.2748	134.599	71.3569	77.553	68.8556	82.5988	203.021
19657	ENSG00000172243	CLEC7A	protein_coding	49.8039	1.85964	0.681736	2.72781	0.0063757	0.0726489	10.0141	44.0044	25.2924	29.9798	1.46303	97.1042	84.3776	78.245	76.7453	32.1862
1019	ENSG00000269113	TRABD2B	protein_coding	6.89367	2.41635	0.885902	2.72756	0.00638054	0.0726626	0.834508	1.49167	1.40513	4.28283	0	2.94255	4.96339	10.9543	24.7146	2.47586
26165	ENSG00000185156	MFSD6L	protein_coding	80.1268	-1.44037	0.528329	-2.72627	0.0064055	0.0729053	84.2853	28.3418	66.7438	29.9798	118.505	22.0691	4.34297	39.9049	25.365	49.5173
14782	ENSG00000164949	GEM	protein_coding	111.292	2.61798	0.960874	2.72458	0.00643833	0.0731606	5.84155	53.7003	57.6105	62.5294	5.85212	98.5754	478.347	197.96	539.819	29.7104
17507	ENSG00000137497	NUMA1	protein_coding	2068.08	-1.11814	0.410396	-2.72455	0.00643889	0.0731606	2003.65	2887.88	3911.19	3348.32	2298.42	1403.6	2000.25	1672.1	1846.44	267.393
30911	ENSG00000104951	IL4I1	protein_coding	56.3326	1.57029	0.576287	2.72483	0.00643341	0.0731606	23.3662	38.0377	11.9436	7.7091	61.4472	129.472	66.3853	57.9013	78.6965	34.6621
21662	ENSG00000215417	MIR17HG	processed_transcript	38.2559	1.23534	0.453464	2.72422	0.00644531	0.0731822	33.3803	14.1709	37.236	17.9879	42.4278	102.989	50.2543	47.7294	28.6169	121.317
22849	ENSG00000198752	CDC42BPB	protein_coding	705.351	-0.976697	0.358542	-2.72408	0.00644811	0.0731822	1013.93	980.03	808.654	778.619	795.888	537.751	632.212	681.514	491.69	108.938
4149	ENSG00000115590	IL1R2	protein_coding	214.148	-1.76942	0.649918	-2.72253	0.0064785	0.0733192	199.447	47.7336	216.391	71.095	248.715	31.6324	30.4008	93.894	55.933	37.138
5647	ENSG00000187091	PLCD1	protein_coding	305.711	-1.09002	0.400337	-2.72277	0.00647377	0.0733192	228.655	170.797	264.868	244.122	251.641	89.7478	67.0058	169.009	137.231	101.51
15363	ENSG00000147883	CDKN2B	protein_coding	189.057	1.22606	0.45031	2.7227	0.00647509	0.0733192	29.2078	89.5004	67.4464	113.067	30.7236	116.966	164.412	254.296	182.108	59.4207
22950	ENSG00000211898	IGHD	IG_C_gene	45.8104	3.15249	1.15771	2.72303	0.00646855	0.0733192	4.17254	14.9167	2.81027	1.71313	7.31515	85.334	1.86127	136.146	0	54.469
26729	ENSG00000275832	ARHGAP23	protein_coding	58.0388	1.49511	0.549105	2.72282	0.00647279	0.0733192	20.8627	49.2252	17.5642	62.5294	30.7236	47.0808	195.433	86.8519	182.758	39.6138
1237	ENSG00000116761	CTH	protein_coding	38.0457	-1.18224	0.434353	-2.72184	0.00649204	0.073348	46.7324	72.3462	78.6875	57.39	23.4085	16.184	44.0501	33.6453	22.7634	9.90346
25209	ENSG00000277559	AC018553.1	lincRNA	5.49228	-4.52195	1.66125	-2.72202	0.0064884	0.073348	9.17959	2.23751	14.0513	18.8445	26.3345	0	0	11.7367	0	0
30418	ENSG00000167641	PPP1R14A	protein_coding	70.6513	1.32158	0.485486	2.72218	0.00648519	0.073348	26.7042	25.3585	16.8616	17.1313	52.6691	64.7361	31.6416	80.5923	115.768	86.6553
2696	ENSG00000117280	RAB29	protein_coding	96.6494	1.10852	0.407352	2.72128	0.00650289	0.0734291	45.0634	105.909	59.7182	91.6527	35.1127	215.542	186.127	101.718	173.653	84.1794
3634	ENSG00000214595	EML6	protein_coding	29.7342	-1.92593	0.707943	-2.72046	0.00651916	0.0735713	19.1937	78.3129	48.4771	23.9839	17.5564	27.2186	11.1676	5.47715	8.45499	2.47586
13139	ENSG00000182287	AP1S2	protein_coding	102.943	1.14013	0.419143	2.72015	0.00652523	0.0735982	61.7536	89.5004	99.7645	73.6647	33.6497	219.956	188.609	101.718	147.637	123.793
1443	ENSG00000099260	PALMD	protein_coding	22.2769	1.7091	0.628422	2.71966	0.00653486	0.073644	5.84155	26.8501	9.83593	17.9879	0	59.5867	34.7437	34.4278	56.5834	2.47586
14385	ENSG00000183779	ZNF703	protein_coding	1226.75	-1.35997	0.500068	-2.71957	0.00653665	0.073644	2675.43	726.445	1057.36	920.809	4348.12	444.325	471.522	455.386	1127.12	1190.89
123	ENSG00000269896	AL513477.1	transcribed_processed_pseudogene	21.7462	-1.82152	0.669869	-2.71922	0.00654359	0.0736807	16.6902	20.1376	11.2411	22.2707	27.7976	5.14946	1.86127	13.3016	3.25192	7.42759
13761	ENSG00000130224	LRCH2	protein_coding	7.40785	3.15887	1.16216	2.7181	0.00656574	0.0738736	0.834508	0	5.62053	1.71313	0	13.2415	18.6127	14.0841	23.4138	0
26258	ENSG00000108474	PIGL	protein_coding	172.285	-0.985289	0.362507	-2.71798	0.0065681	0.0738736	241.173	158.117	172.129	203.863	400.87	137.564	128.428	100.154	143.735	64.3725
12616	ENSG00000135245	HILPDA	protein_coding	88.3644	1.06963	0.393605	2.71753	0.00657704	0.0739236	90.1268	49.2252	101.17	83.087	59.9842	247.174	168.135	110.325	199.018	106.462
25151	ENSG00000102935	ZNF423	protein_coding	23.0843	1.44646	0.532297	2.71739	0.00657993	0.0739236	10.8486	18.6459	16.8616	11.9919	4.38909	77.242	26.0578	18.7788	40.9742	22.2828
10642	ENSG00000112115	IL17A	protein_coding	4.07386	3.81288	1.40369	2.71634	0.0066009	0.074076	5.00705	2.23751	0	0	0	10.2989	19.8536	6.2596	3.9023	9.90346
26711	ENSG00000276023	DUSP14	protein_coding	42.966	1.70681	0.628323	2.71645	0.00659867	0.074076	32.5458	30.5793	30.9129	32.5495	14.6303	56.6441	150.143	67.2907	113.167	76.7518
10599	ENSG00000112759	SLC29A1	protein_coding	310.246	0.913871	0.336511	2.71573	0.00661305	0.0741707	237.835	259.551	451.048	330.635	178.49	372.968	691.152	604.834	552.826	453.083
5398	ENSG00000180914	OXTR	protein_coding	10.0631	1.78914	0.65892	2.71526	0.00662246	0.0742346	12.5176	3.72918	3.51283	4.28283	8.77818	20.5979	17.9923	17.9963	35.1207	14.8552
13369	ENSG00000049769	PPP1R3F	protein_coding	19.8391	1.47654	0.543902	2.71471	0.00663338	0.0742738	7.51057	9.69588	5.62053	23.1273	10.2412	16.9197	38.4663	8.60695	57.2338	37.138
18037	ENSG00000137709	POU2F3	protein_coding	17.0536	-1.9206	0.707449	-2.71482	0.00663117	0.0742738	13.3521	46.2419	9.83593	20.5576	36.5757	1.47128	1.86127	10.1718	9.75576	7.42759
7158	ENSG00000168936	TMEM129	protein_coding	469.674	-0.757198	0.279042	-2.71356	0.0066564	0.0744898	723.518	451.231	500.93	484.817	747.608	330.301	240.104	353.667	358.362	458.035
27460	ENSG00000154262	ABCA6	protein_coding	15.1452	2.2092	0.81419	2.71337	0.00666029	0.0744918	0.834508	2.98335	4.2154	5.99597	0	15.4484	6.82466	13.3016	30.5681	2.47586
26077	ENSG00000006047	YBX2	protein_coding	177.762	-0.998674	0.368181	-2.71245	0.00667873	0.0746563	223.648	220.022	139.108	256.113	272.123	116.231	99.8882	57.9013	116.419	178.262
11140	ENSG00000182747	SLC35D3	protein_coding	18.5052	3.43984	1.26838	2.71199	0.00668803	0.0747185	0.834508	4.47502	4.2154	0.856567	5.85212	74.2994	144.559	0.78245	40.9742	0
406	ENSG00000211454	AKR7L	polymorphic_pseudogene	60.8844	-1.18442	0.436827	-2.71142	0.00669949	0.0748048	95.1339	80.5504	55.5028	43.6849	87.7818	27.9542	22.3353	30.5155	39.023	32.1862
25078	ENSG00000169896	ITGAM	protein_coding	84.4992	1.73214	0.639022	2.71061	0.00671605	0.0749479	7.51057	64.142	23.8873	34.2627	27.7976	133.886	103.611	93.894	119.02	17.3311
17202	ENSG00000133328	HRASLS2	protein_coding	28.9153	3.00223	1.10819	2.70913	0.00674604	0.0752405	1.66902	1.49167	0	0	2.92606	3.67819	0	42.2523	16.91	4.95173
2822	ENSG00000092969	TGFB2	protein_coding	6.40515	2.91618	1.07657	2.70877	0.00675328	0.0752747	0	2.98335	0.702567	5.1394	0	17.6553	40.948	4.6947	14.9588	0
9999	ENSG00000111802	TDP2	protein_coding	1645.82	-0.888473	0.328018	-2.70861	0.00675663	0.0752747	1630.63	1112.04	1469.07	827.444	1758.56	776.098	272.366	1089.95	626.32	1074.53
7303	ENSG00000109743	BST1	protein_coding	39.3556	1.09598	0.405	2.70612	0.00680743	0.0757984	10.8486	20.8834	25.2924	19.701	10.2412	58.851	29.7803	50.0768	34.4704	17.3311
11851	ENSG00000175600	SUGCT	protein_coding	22.6466	1.50829	0.557498	2.70546	0.00682099	0.0759072	19.1937	5.96669	3.51283	4.28283	8.77818	33.8393	24.1965	12.5192	31.8688	9.90346
18881	ENSG00000148600	CDHR1	protein_coding	1538.48	-1.3033	0.481942	-2.70427	0.00684543	0.0761023	1345.23	1134.42	2500.43	2699.04	2052.63	351.635	1493.36	282.464	1402.88	869.028
22657	ENSG00000165521	EML5	protein_coding	122.472	-1.45115	0.53662	-2.70424	0.00684613	0.0761023	236.166	153.642	164.401	158.465	144.84	97.1042	78.7938	143.971	81.9484	0
14768	ENSG00000188343	FAM92A	protein_coding	127.561	1.18848	0.43956	2.70379	0.00685543	0.0761634	118.5	100.688	105.385	168.744	33.6497	241.289	272.366	225.346	156.092	207.973
28156	ENSG00000134759	ELP2	protein_coding	373.843	-0.606605	0.224371	-2.70358	0.0068596	0.0761674	476.504	375.902	618.259	464.259	500.356	356.784	301.526	350.538	256.902	321.862
14791	ENSG00000104413	ESRP1	protein_coding	952.341	-0.733503	0.271359	-2.70307	0.00687023	0.0762431	1198.35	1141.88	1547.75	1386.78	1066.55	886.443	769.946	980.41	461.773	750.187
10942	ENSG00000112290	WASF1	protein_coding	15.103	1.8113	0.670543	2.70124	0.00690812	0.0766211	10.0141	16.4084	6.3231	9.42224	2.92606	35.3106	24.1965	29.7331	35.7711	14.8552
7136	ENSG00000127418	FGFRL1	protein_coding	280.845	-0.984589	0.364556	-2.70079	0.00691752	0.0766829	370.521	517.611	592.264	712.664	226.77	445.061	311.453	122.062	334.948	106.462
15682	ENSG00000119121	TRPM6	protein_coding	309.462	1.25134	0.46366	2.69884	0.00695824	0.0770916	18.3592	30.5793	23.1847	42.8283	48.28	13.9771	130.909	190.135	76.0949	103.986
393	ENSG00000074964	ARHGEF10L	protein_coding	662.912	-0.719548	0.26664	-2.69858	0.0069637	0.0771094	794.451	774.925	977.973	1047.58	753.46	642.212	614.219	388.878	658.189	376.331
7531	ENSG00000245067	IGFBP7-AS1	antisense	381.582	2.21209	0.819931	2.6979	0.00697775	0.0772223	24.2007	330.406	149.647	256.113	7.31515	937.938	926.913	823.92	1694.9	2.47586
20031	ENSG00000174233	ADCY6	protein_coding	726.195	-0.851119	0.315523	-2.69749	0.00698648	0.0772761	657.592	1249.28	1188.04	1229.17	481.337	720.189	522.397	705.77	489.739	235.207
5383	ENSG00000235831	BHLHE40-AS1	antisense	20.0513	2.60642	0.966307	2.6973	0.00699051	0.0772779	0.834508	8.20421	12.6462	13.7051	0	37.5175	81.2755	37.5576	44.8765	7.42759
31863	ENSG00000185666	SYN3	protein_coding	3.63543	5.07867	1.88328	2.69672	0.00700269	0.0773698	0	0	4.2154	0	0	5.8851	15.5106	0	16.91	9.90346
19153	ENSG00000138172	CALHM2	protein_coding	51.4992	1.21176	0.449425	2.69625	0.0070124	0.0774344	12.5176	66.3795	20.3744	46.2546	20.4824	74.2994	89.9614	64.1609	129.426	19.8069
9476	ENSG00000197083	ZNF300P1	transcribed_unprocessed_pseudogene	13.6674	2.02177	0.749933	2.69593	0.00701924	0.0774671	0.834508	17.9001	7.72823	0.856567	0	19.1266	51.4952	10.1718	12.3573	0
30988	ENSG00000160318	CLDND2	protein_coding	61.3137	-2.37788	0.882693	-2.69389	0.00706244	0.077901	54.243	4.47502	6.3231	3.42627	138.988	4.41383	0.620424	4.6947	1.30077	32.1862
20357	ENSG00000224713	AC025165.1	antisense	33.5113	2.10448	0.781368	2.69332	0.00707435	0.0779464	5.00705	29.0876	14.7539	15.4182	1.46303	52.2303	50.8747	45.3821	160.645	0
23364	ENSG00000166762	CATSPER2	protein_coding	69.0589	-1.55303	0.576596	-2.69345	0.00707159	0.0779464	35.8838	17.9001	58.313	43.6849	98.023	20.5979	2.48169	27.3857	1.95115	94.0829
8833	ENSG00000249825	AC012636.1	antisense	13.5797	2.89271	1.07477	2.69147	0.00711384	0.0783162	3.33803	4.47502	6.3231	0	0	29.4255	17.3719	1.5649	121.622	4.95173
24768	ENSG00000188215	DCUN1D3	protein_coding	68.8442	0.942145	0.35006	2.69138	0.00711574	0.0783162	65.0916	49.2252	56.9079	41.9718	43.8909	92.6903	137.114	91.5466	149.588	47.0414
9645	ENSG00000120149	MSX2	protein_coding	64.763	-2.26451	0.842661	-2.68733	0.00720259	0.0792285	337.976	184.222	77.9849	112.21	19.0194	83.1271	77.553	3.1298	14.3085	39.6138
1442	ENSG00000117600	PLPPR4	protein_coding	7.20138	2.72664	1.01473	2.68706	0.00720848	0.0792497	2.50352	5.96669	2.1077	0.856567	0	13.2415	35.3641	7.04205	20.8123	0
22867	ENSG00000166165	CKB	protein_coding	17094.4	-2.38355	0.887247	-2.68646	0.00722147	0.0793489	24734.8	5103.76	8706.21	1667.74	39144.8	4527.11	294.701	3344.97	993.787	6273.84
14481	ENSG00000221869	CEBPD	protein_coding	406.494	1.13943	0.424185	2.68617	0.00722768	0.0793736	317.113	211.072	148.944	248.404	318.94	433.291	459.114	691.686	744.039	413.469
32160	ENSG00000130943	PKDREJ	protein_coding	5.64317	-2.43035	0.904866	-2.68586	0.00723425	0.0794021	10.0141	8.20421	7.02567	6.85253	17.5564	0.735638	1.24085	3.91225	0.650384	2.47586
15852	ENSG00000271384	AL161729.3	lincRNA	24.5709	-3.41219	1.27126	-2.6841	0.00727243	0.0797774	5.00705	4.47502	1.40513	1.71313	68.7624	0.735638	0	0	0.650384	9.90346
23360	ENSG00000168781	PPIP5K1	protein_coding	150.394	-0.986654	0.367687	-2.6834	0.00728771	0.0799013	136.859	209.58	236.062	196.154	200.435	109.61	71.3487	177.616	88.4522	74.2759
3859	ENSG00000144045	DQX1	protein_coding	155.98	-1.12937	0.421015	-2.68249	0.00730757	0.0800752	195.275	250.601	226.929	133.624	203.361	172.875	104.231	31.298	88.4522	96.5587
20500	ENSG00000127324	TSPAN8	protein_coding	6366.96	-1.21127	0.451648	-2.68188	0.00732095	0.0801778	11701.5	8643.5	12070.1	9371.7	7490.71	8101.58	2148.53	7268.96	2103.99	3941.58
3530	ENSG00000162882	HAAO	protein_coding	295.057	-1.0066	0.375518	-2.68055	0.00735004	0.0804524	313.775	183.476	140.513	114.78	801.74	88.2765	45.9114	122.845	100.81	482.794
11075	ENSG00000164483	SAMD3	protein_coding	8.20285	2.3314	0.870015	2.67973	0.00736818	0.0805627	0.834508	5.22086	4.91797	4.28283	0	13.9771	19.8536	17.9963	10.4061	7.42759
13876	ENSG00000101928	MOSPD1	protein_coding	84.1308	1.21511	0.453419	2.67988	0.00736484	0.0805627	62.5881	41.021	86.4157	42.8283	52.6691	94.1616	175.58	65.7258	134.63	210.448
827	ENSG00000163909	HEYL	protein_coding	54.5241	1.25102	0.466912	2.67935	0.00737657	0.0805799	23.3662	33.5627	47.072	40.2586	49.743	87.5409	123.464	44.5996	200.969	37.138
9400	ENSG00000156463	SH3RF2	protein_coding	386.438	-0.571034	0.213129	-2.67929	0.0073778	0.0805799	408.909	482.556	550.812	371.75	488.652	334.715	323.861	382.618	187.961	341.669
19849	ENSG00000276261	AC009509.4	antisense	5.86006	-3.27587	1.22275	-2.67909	0.00738228	0.0805849	4.17254	0.745837	4.2154	9.42224	1.46303	0	0.620424	0.78245	0	0
498	ENSG00000117305	HMGCL	protein_coding	689.964	-1.10207	0.41139	-2.67888	0.0073868	0.0805883	1094.87	377.393	541.679	340.914	1286	322.209	168.135	323.152	280.966	589.256
2593	ENSG00000134369	NAV1	protein_coding	131.761	1.0518	0.392732	2.67816	0.00740274	0.0805883	83.4508	178.255	85.7131	112.21	29.2606	219.22	307.73	107.978	241.293	111.414
13287	ENSG00000147119	CHST7	protein_coding	15.6108	1.64133	0.612784	2.67847	0.0073959	0.0805883	2.50352	11.1876	7.02567	12.8485	4.38909	12.5058	23.5761	35.9927	35.7711	9.90346
15024	ENSG00000212993	POU5F1B	protein_coding	18.0685	2.28132	0.851692	2.67857	0.00739364	0.0805883	9.17959	5.22086	9.13337	0	11.7042	3.67819	11.788	108.761	40.9742	59.4207
32617	ENSG00000142173	COL6A2	protein_coding	3715.17	1.40677	0.525245	2.67831	0.00739938	0.0805883	874.564	1187.37	663.925	1227.46	3413.25	2670.36	3674.77	2005.42	7050.81	1354.3
13074	ENSG00000157399	ARSE	protein_coding	497.338	-0.909577	0.339778	-2.67697	0.00742909	0.0808312	804.465	429.602	653.387	389.738	1068.01	376.646	160.69	429.565	236.089	648.677
22787	ENSG00000205476	CCDC85C	protein_coding	446.764	-0.968612	0.361898	-2.67648	0.00743998	0.0809057	635.06	526.561	583.13	553.342	493.041	306.025	376.597	497.638	372.02	71.8001
11092	ENSG00000079931	MOXD1	protein_coding	40.8045	2.05378	0.767597	2.67559	0.00745978	0.081077	0.834508	70.1087	25.2924	29.9798	1.46303	77.242	36.605	94.6764	169.75	9.90346
20794	ENSG00000076555	ACACB	protein_coding	315.054	-0.89907	0.336076	-2.6752	0.00746854	0.0811281	205.289	372.918	173.534	186.732	373.072	102.989	121.603	125.192	189.912	155.979
9439	ENSG00000145882	PCYOX1L	protein_coding	75.8092	-0.938461	0.35092	-2.67429	0.00748878	0.0811717	134.356	110.384	104.682	102.788	61.4472	90.4834	22.3353	74.3327	52.0307	44.5656
20801	ENSG00000110921	MVK	protein_coding	179.079	-0.72941	0.272734	-2.67444	0.00748553	0.0811717	205.289	190.188	167.913	173.883	384.777	100.047	104.231	146.318	126.175	188.166
21778	ENSG00000153487	ING1	protein_coding	157.125	0.718359	0.268614	2.67432	0.00748805	0.0811717	126.845	114.113	113.816	87.3698	200.435	253.795	214.046	143.971	173.653	255.014
22034	ENSG00000100908	EMC9	protein_coding	287.326	-1.37423	0.513828	-2.67449	0.00748428	0.0811717	519.898	134.996	110.303	95.0789	740.293	82.3914	45.2909	95.4589	81.298	311.959
754	ENSG00000142687	KIAA0319L	protein_coding	557.289	-0.645599	0.241465	-2.67367	0.00750258	0.0812773	524.905	531.036	643.551	728.938	624.713	422.992	418.786	372.446	350.557	359
25565	ENSG00000103089	FA2H	protein_coding	210.264	-1.01637	0.38021	-2.67318	0.00751349	0.0813514	363.011	137.234	182.667	169.6	450.613	83.8627	125.326	151.013	64.388	225.304
12961	ENSG00000164867	NOS3	protein_coding	58.1562	1.55807	0.583023	2.67239	0.00753122	0.0814993	18.3592	71.6003	12.6462	38.5455	29.2606	116.231	213.426	112.673	83.2492	9.90346
5062	ENSG00000135925	WNT10A	protein_coding	26.5459	2.28268	0.854377	2.67175	0.00754568	0.0815675	1.66902	33.5627	2.81027	9.42224	5.85212	15.4484	1.24085	64.1609	65.6888	47.0414
24069	ENSG00000242498	ARPIN	protein_coding	265.769	-0.922688	0.345346	-2.67178	0.00754507	0.0815675	246.18	372.918	451.75	411.152	226.77	135.357	279.191	229.258	158.694	121.317
4621	ENSG00000204335	SP5	protein_coding	36.6292	-2.00561	0.751161	-2.67002	0.00758463	0.0819443	75.9402	70.1087	61.1233	105.358	54.1321	22.8048	2.48169	122.062	10.4061	7.42759
19294	ENSG00000138162	TACC2	protein_coding	367.882	-0.83734	0.313635	-2.66979	0.00758978	0.0819557	690.972	442.281	577.51	470.255	495.967	265.565	321.379	265.251	376.572	274.821
8934	ENSG00000153113	CAST	protein_coding	1498.99	-0.67619	0.253325	-2.66925	0.007602	0.0820143	2117.98	2057.76	1870.93	1863.89	1452.79	2009.76	1176.94	1559.42	853.304	690.766
13469	ENSG00000169083	AR	protein_coding	13.6041	2.47451	0.927064	2.66919	0.0076034	0.0820143	7.51057	5.22086	0.702567	2.5697	2.92606	20.5979	14.2697	48.5119	24.7146	0
10436	ENSG00000007866	TEAD3	protein_coding	213.258	0.855857	0.320691	2.66879	0.00761255	0.0820687	90.9613	190.188	203.042	224.421	109.727	279.542	303.387	278.552	372.67	210.448
19934	ENSG00000188906	LRRK2	protein_coding	23.2717	2.38094	0.892726	2.66705	0.00765212	0.0824065	0.834508	24.6126	2.81027	19.701	0	28.6899	45.9114	39.1225	45.5269	9.90346
27413	ENSG00000075461	CACNG4	protein_coding	13.0901	3.64058	1.36501	2.66707	0.0076515	0.0824065	2.50352	1.49167	2.81027	0	2.92606	30.1611	0.620424	22.691	29.9177	61.8966
10302	ENSG00000204386	NEU1	protein_coding	482.375	0.981608	0.368078	2.66685	0.00765655	0.0824099	440.62	331.152	469.314	222.707	365.757	823.914	895.271	302.808	651.685	977.966
24859	ENSG00000103375	AQP8	protein_coding	1746.32	-2.779	1.0422	-2.66647	0.00766535	0.0824603	363.011	36.546	531.14	6.85253	1919.49	11.7702	9.92678	204.219	20.8123	217.876
17141	ENSG00000221968	FADS3	protein_coding	88.9793	1.10948	0.41633	2.6649	0.00770107	0.0828	55.912	49.9711	57.6105	40.2586	57.0581	59.5867	171.857	93.1115	227.634	84.1794
26014	ENSG00000132517	SLC52A1	protein_coding	34.5234	-2.20706	0.828647	-2.66345	0.00773442	0.0831138	5.00705	17.1542	0	8.56567	35.1127	2.20691	0	0.78245	1.95115	12.3793
713	ENSG00000121900	TMEM54	protein_coding	6342.96	-1.63602	0.614423	-2.66269	0.00775177	0.0832454	6052.68	1792.25	1606.07	1381.64	14135.8	1207.92	305.869	1957.69	727.129	4793.27
25243	ENSG00000125144	MT1G	protein_coding	2528.65	-1.31643	0.494423	-2.66256	0.00775499	0.0832454	229.49	208.088	1525.27	513.084	1296.24	34.575	31.0212	666.647	529.413	943.304
23819	ENSG00000178741	COX5A	protein_coding	1778.11	-1.05898	0.397893	-2.66146	0.00778023	0.0833993	3326.35	1284.33	1668.6	1561.52	3079.68	948.237	611.738	1327.82	664.693	1911.37
25088	ENSG00000140682	TGFB1I1	protein_coding	203.848	1.2685	0.476604	2.66153	0.00777856	0.0833993	51.7395	87.2629	71.6618	82.2304	191.657	199.358	210.944	141.623	436.408	106.462
26207	ENSG00000188803	SHISA6	protein_coding	19.6818	-2.09914	0.788737	-2.66139	0.00778182	0.0833993	11.6831	9.69588	147.539	65.9556	1.46303	1.47128	6.82466	40.6874	3.9023	0
27180	ENSG00000275897	AC021491.4	lincRNA	5.74885	-3.09022	1.16169	-2.66011	0.00781163	0.0836739	5.84155	0.745837	1.40513	7.7091	8.77818	0	0	0	2.60154	0
13683	ENSG00000182916	TCEAL7	protein_coding	10.6068	2.39942	0.902156	2.65965	0.00782208	0.083741	0	11.1876	5.62053	3.42627	0	7.35638	13.6493	22.691	28.6169	4.95173
14321	ENSG00000186918	ZNF395	protein_coding	516.681	-1.24278	0.467356	-2.65916	0.00783352	0.0838187	336.307	221.514	426.458	369.18	940.728	224.369	83.1368	204.219	178.205	146.076
21529	ENSG00000152213	ARL11	protein_coding	21.5636	1.99523	0.750797	2.65748	0.00787282	0.0841942	5.00705	8.20421	10.5385	46.2546	0	26.483	29.7803	39.9049	40.3238	39.6138
14551	ENSG00000251396	LINC01301	lincRNA	5.2675	-2.43037	0.914869	-2.65652	0.00789508	0.0843871	6.67606	6.71253	9.83593	41.1152	1.46303	0.735638	1.86127	2.34735	1.95115	2.47586
22764	ENSG00000100739	BDKRB1	protein_coding	14.7354	1.55156	0.584157	2.65607	0.00790562	0.0844546	2.50352	7.45837	4.2154	5.1394	4.38909	2.94255	10.5472	28.1682	27.9665	9.90346
24453	ENSG00000167978	SRRM2	protein_coding	4360.82	-0.607735	0.22894	-2.65456	0.00794109	0.0847883	4805.1	6878.11	4441.63	6426.82	4223.77	4165.92	3362.08	3163.45	3605.08	3146.82
958	ENSG00000162415	ZSWIM5	protein_coding	74.1769	-1.51144	0.569537	-2.65381	0.00795895	0.0848884	60.9191	122.317	171.426	189.301	21.9454	40.4601	102.37	56.3364	29.9177	4.95173
27667	ENSG00000108679	LGALS3BP	protein_coding	5462.63	-0.958294	0.361083	-2.65394	0.00795572	0.0848884	8644.67	3718.74	4968.55	3792.88	11955.9	3455.29	1979.15	4585.16	2288.7	4119.84
22285	ENSG00000020577	SAMD4A	protein_coding	69.0587	1.19686	0.451048	2.65351	0.00796604	0.0849187	32.5458	33.5627	66.7438	37.6889	48.28	102.254	166.894	66.5082	143.085	51.9932
3650	ENSG00000115380	EFEMP1	protein_coding	268.403	1.40602	0.530016	2.65279	0.00798286	0.0849364	31.7113	209.58	120.139	140.477	23.4085	434.762	184.886	207.349	543.721	44.5656
5308	ENSG00000218416	AC110619.1	processed_transcript	7.94017	-3.15193	1.18841	-2.65221	0.0079966	0.0849364	22.5317	0.745837	9.83593	6.85253	10.2412	1.47128	0.620424	0	1.30077	2.47586
5646	ENSG00000136059	VILL	protein_coding	1325.78	-1.03894	0.391803	-2.65169	0.00800898	0.0849364	1079.02	710.783	843.782	486.53	2481.3	331.773	238.863	940.505	520.307	646.201
10592	ENSG00000181577	C6orf223	protein_coding	108.574	1.71723	0.647446	2.65232	0.00799403	0.0849364	97.6374	73.8379	28.1027	17.9879	226.77	236.14	273.607	102.501	158.043	376.331
14957	ENSG00000187955	COL14A1	protein_coding	236.4	1.44175	0.543411	2.65315	0.00797442	0.0849364	18.3592	245.38	200.934	121.632	24.8715	322.945	446.705	223.781	376.572	106.462
20924	ENSG00000274859	AC131238.1	antisense	32.0708	-1.35167	0.509731	-2.65172	0.0080082	0.0849364	31.7113	29.8335	50.5848	43.6849	49.743	12.5058	30.4008	21.1261	16.2596	0
21458	ENSG00000237361	TUSC8	lincRNA	23.827	1.69497	0.639096	2.65213	0.00799852	0.0849364	9.17959	19.3918	0.702567	22.2707	24.8715	49.2877	36.605	14.8665	31.8688	39.6138
26230	ENSG00000266378	AC005224.3	lincRNA	33.8171	-4.01506	1.51418	-2.65164	0.00801015	0.0849364	7.51057	1.49167	0	4.28283	21.9454	0	0	0	0.650384	2.47586
31872	ENSG00000175329	ISX	protein_coding	287.452	-1.12057	0.422468	-2.65245	0.00799105	0.0849364	125.176	258.06	565.566	453.124	169.711	184.645	217.148	194.048	120.971	34.6621
32089	ENSG00000235568	NFAM1	protein_coding	69.5381	1.16276	0.438428	2.65211	0.00799911	0.0849364	18.3592	42.5127	21.077	30.8364	68.7624	61.0579	68.2466	75.8976	107.313	42.0897
561	ENSG00000158062	UBXN11	protein_coding	3330.48	-2.04845	0.772712	-2.65099	0.00802562	0.0850555	5108.86	513.136	562.756	626.15	11847.6	571.59	253.753	509.375	568.436	349.097
1760	ENSG00000271601	LIX1L	protein_coding	77.6407	0.99023	0.373558	2.65081	0.00802994	0.0850561	35.8838	46.2419	33.7232	64.2425	54.1321	129.472	117.26	75.1152	139.182	37.138
106	ENSG00000215790	SLC35E2A	protein_coding	115.083	-1.09001	0.411259	-2.65042	0.00803917	0.0851089	88.4578	149.913	153.862	271.532	204.824	80.1845	62.0424	77.4625	150.889	29.7104
18444	ENSG00000099250	NRP1	protein_coding	199.177	1.55255	0.585919	2.64977	0.00805474	0.0852286	20.0282	272.23	96.2516	111.354	35.1127	266.301	499.441	264.468	416.246	71.8001
9370	ENSG00000156453	PCDH1	protein_coding	451.522	-0.626004	0.236288	-2.64932	0.00806534	0.0852506	486.518	472.861	456.668	489.956	727.126	423.727	317.036	358.362	243.244	363.952
23314	ENSG00000137877	SPTBN5	protein_coding	113.756	1.60899	0.607282	2.64949	0.00806142	0.0852506	79.2782	65.6336	41.4514	47.1112	137.525	317.06	437.399	98.5887	232.187	47.0414
180	ENSG00000069812	HES2	protein_coding	190.629	-1.12021	0.423013	-2.64818	0.00809261	0.0854937	352.997	163.338	184.072	304.938	279.439	83.8627	160.69	63.3784	127.475	205.497
7438	ENSG00000151806	GUF1	protein_coding	276.187	-0.671093	0.253541	-2.64689	0.00812364	0.08567	388.881	293.86	333.017	275.815	493.041	155.955	279.811	225.346	159.344	316.911
7632	ENSG00000138744	NAAA	protein_coding	273.974	-0.747566	0.282418	-2.64701	0.00812059	0.08567	222.814	240.905	274.704	272.388	185.805	154.484	145.8	136.929	156.743	118.841
23786	ENSG00000205363	C15orf59	protein_coding	6.83367	2.30774	0.871909	2.64677	0.00812642	0.08567	0	4.47502	1.40513	5.99597	0	4.41383	12.4085	10.9543	26.0154	0
24838	ENSG00000134398	ERN2	protein_coding	2010.28	-1.34551	0.508339	-2.64687	0.00812401	0.08567	2570.28	1085.19	1320.83	1442.46	4444.68	916.605	296.563	740.98	1300.12	836.842
2497	ENSG00000135842	FAM129A	protein_coding	77.2639	1.76548	0.667215	2.64605	0.00814379	0.0858078	6.67606	130.521	28.1027	54.8203	2.92606	133.886	118.501	117.367	141.784	22.2828
8771	ENSG00000198780	FAM169A	protein_coding	25.2521	-1.73262	0.654981	-2.6453	0.00816193	0.0859516	54.243	26.1043	48.4771	70.2385	14.6303	41.9313	14.8902	28.1682	3.25192	0
29184	ENSG00000092758	COL9A3	protein_coding	79.8657	1.40911	0.532721	2.64513	0.00816602	0.0859516	117.666	90.2463	24.5898	33.4061	39.5018	214.806	152.004	83.7221	72.1926	188.166
5748	ENSG00000163812	ZDHHC3	protein_coding	950.79	-0.6507	0.246044	-2.64464	0.00817768	0.0859787	1400.3	931.55	1100.22	885.69	1405.97	598.073	944.905	903.73	575.59	638.773
5823	ENSG00000145040	UCN2	protein_coding	6.30841	3.67901	1.39129	2.64432	0.00818556	0.0859787	0	1.49167	0	3.42627	1.46303	3.67819	39.7071	3.1298	35.1207	2.47586
19239	ENSG00000266200	PNLIPRP2	polymorphic_pseudogene	59.0867	-2.4092	0.911089	-2.64431	0.00818578	0.0859787	15.0211	3.72918	4.91797	11.1354	20.4824	0	1.24085	0	7.15423	4.95173
21552	ENSG00000136104	RNASEH2B	protein_coding	304.832	0.804383	0.304159	2.64461	0.00817849	0.0859787	302.092	176.018	226.929	232.986	256.03	478.9	374.736	259.773	317.387	745.235
24067	ENSG00000157823	AP3S2	protein_coding	235.951	-1.00941	0.381817	-2.64369	0.00820074	0.0860906	227.821	199.138	136.298	149.899	375.999	82.3914	80.6551	128.322	98.8584	148.552
11083	ENSG00000154269	ENPP3	protein_coding	137.357	-1.37993	0.522052	-2.64327	0.0082109	0.086152	138.528	305.793	283.134	172.17	52.6691	372.968	138.354	58.6837	44.8765	7.42759
3804	ENSG00000003137	CYP26B1	protein_coding	11.5755	1.97989	0.749184	2.64272	0.00822419	0.0862462	2.50352	4.47502	4.91797	4.28283	5.85212	5.8851	48.393	20.3437	24.0642	4.95173
26564	ENSG00000131242	RAB11FIP4	protein_coding	480.374	-0.750953	0.284224	-2.64212	0.00823899	0.086311	510.719	487.777	558.54	400.017	901.226	304.554	307.11	410.786	167.799	519.932
29054	ENSG00000124171	PARD6B	protein_coding	64.6898	1.53782	0.582012	2.64225	0.00823581	0.086311	41.7254	43.2585	56.2053	30.8364	27.7976	90.4834	145.179	93.894	91.7042	131.221
14988	ENSG00000156804	FBXO32	protein_coding	221.967	1.09943	0.416212	2.64153	0.00825335	0.0864161	179.419	124.555	122.247	126.772	87.7818	428.877	349.919	275.422	419.498	84.1794
11320	ENSG00000112096	SOD2	protein_coding	1308.56	1.36879	0.518249	2.64117	0.00826196	0.0864611	403.067	1528.97	837.459	1310.55	258.956	2449.67	4839.3	1481.18	2349.84	844.27
12175	ENSG00000127947	PTPN12	protein_coding	323.381	1.0277	0.389314	2.63977	0.00829626	0.0867392	206.123	408.719	281.027	258.683	105.338	731.959	824.543	378.706	489.089	242.635
14847	ENSG00000147669	POLR2K	protein_coding	265.373	0.97107	0.367881	2.63963	0.00829971	0.0867392	264.539	220.022	255.734	242.408	134.599	463.452	334.408	491.379	369.418	438.228
26097	ENSG00000181222	POLR2A	protein_coding	627.001	-0.654478	0.24795	-2.63955	0.00830155	0.0867392	716.008	926.329	716.618	860.85	763.701	548.05	488.273	537.543	458.521	497.649
8969	ENSG00000112874	NUDT12	protein_coding	136.323	-0.935299	0.35446	-2.63866	0.00832341	0.0868316	141.866	193.918	193.206	174.74	193.12	81.6558	104.231	129.104	64.388	101.51
11698	ENSG00000243766	HOTTIP	antisense	203.93	-1.71974	0.651671	-2.63897	0.00831575	0.0868316	218.641	375.156	235.36	265.536	323.329	41.9313	143.938	107.196	87.8019	96.5587
22091	ENSG00000100473	COCH	protein_coding	28.3574	1.48296	0.561978	2.63883	0.00831934	0.0868316	4.17254	30.5793	15.4565	16.2748	29.2606	53.7016	47.1522	67.2907	55.933	17.3311
13224	ENSG00000165168	CYBB	protein_coding	361.957	1.28959	0.488901	2.63772	0.00834642	0.0868905	61.7536	489.269	188.288	214.142	76.0775	814.351	496.959	405.309	492.991	168.359
20765	ENSG00000120832	MTERF2	protein_coding	119.326	-1.49528	0.566831	-2.63797	0.00834049	0.0868905	175.247	164.83	229.037	245.835	165.322	130.208	78.7938	125.192	72.843	27.2345
27005	ENSG00000224505	AC138150.1	antisense	39.374	-1.21962	0.462367	-2.63777	0.0083452	0.0868905	97.6374	41.7669	41.4514	35.9758	32.1866	33.8393	16.131	32.8629	27.3161	2.47586
31119	ENSG00000167613	LAIR1	protein_coding	150.19	1.16076	0.440016	2.63799	0.00833982	0.0868905	23.3662	123.809	80.0926	70.2385	45.3539	200.093	109.195	181.528	184.709	76.7518
6405	ENSG00000171084	FAM86JP	transcribed_unprocessed_pseudogene	62.8981	-1.70255	0.645784	-2.63641	0.00837886	0.0870675	237	24.6126	27.4001	53.1071	324.792	38.9888	9.92678	28.9506	29.9177	51.9932
26684	ENSG00000276070	CCL4L2	protein_coding	23.4541	1.5924	0.604	2.63643	0.00837833	0.0870675	4.17254	24.6126	11.9436	10.2788	16.0933	14.7128	53.3564	50.0768	35.7711	39.6138
26949	ENSG00000108852	MPP2	protein_coding	10.8076	2.11879	0.803625	2.63654	0.00837564	0.0870675	1.66902	1.49167	5.62053	0	1.46303	5.14946	3.72254	7.8245	11.7069	22.2828
28468	ENSG00000088882	CPXM1	protein_coding	97.1297	2.08069	0.789238	2.63633	0.00838083	0.0870675	44.2289	129.03	1.40513	29.9798	86.3187	126.53	131.53	68.8556	398.035	79.2277
11046	ENSG00000111912	NCOA7	protein_coding	556.051	1.53998	0.584207	2.63603	0.00838833	0.0871002	191.937	457.198	351.283	374.32	200.435	735.638	1413.95	1391.2	933.952	435.752
15788	ENSG00000165030	NFIL3	protein_coding	112.524	1.0572	0.401119	2.63563	0.00839824	0.0871579	134.356	72.3462	87.1183	76.2345	52.6691	188.323	220.25	154.143	231.537	84.1794
15469	ENSG00000198853	RUSC2	protein_coding	70.0867	1.4043	0.532926	2.63507	0.00841201	0.0872555	19.1937	62.6503	28.1027	52.2506	32.1866	95.6329	203.499	97.0238	218.529	14.8552
12304	ENSG00000166448	TMEM130	protein_coding	4.56246	3.99228	1.51524	2.63475	0.00841981	0.0872911	0	0	0	0	0	5.14946	2.48169	0	10.4061	0
31879	ENSG00000100297	MCM5	protein_coding	440.632	-0.663091	0.2517	-2.63445	0.00842728	0.0873234	571.638	384.852	567.674	583.322	817.833	242.025	286.015	546.15	303.079	497.649
6739	ENSG00000283154	IQCJ-SCHIP1	protein_coding	4.80809	2.80854	1.06619	2.63418	0.00843402	0.087348	2.50352	0.745837	1.40513	2.5697	0	8.09201	26.0578	3.91225	16.2596	2.47586
1078	ENSG00000174348	PODN	protein_coding	137.849	1.68668	0.640455	2.63356	0.00844942	0.0874622	15.0211	90.9921	51.9899	47.9677	64.3733	170.668	124.085	180.746	359.662	17.3311
28230	ENSG00000154832	CXXC1	protein_coding	636.495	-0.98547	0.37424	-2.63325	0.0084571	0.0874965	831.17	478.081	432.781	513.084	1231.87	393.566	247.549	341.148	257.552	418.421
5515	ENSG00000131386	GALNT15	protein_coding	11.2055	2.4797	0.942358	2.63138	0.00850388	0.0879287	0	5.22086	4.91797	2.5697	0	7.35638	42.1888	4.6947	32.5192	0
8936	ENSG00000164307	ERAP1	protein_coding	909.629	-0.949747	0.360952	-2.63123	0.00850767	0.0879287	950.504	1399.94	1213.33	1329.39	629.103	968.099	839.433	1060.22	370.719	170.835
27576	ENSG00000161533	ACOX1	protein_coding	661.579	-0.651843	0.247762	-2.63092	0.0085154	0.0879632	683.462	707.053	738.397	477.964	722.736	591.453	509.988	337.236	258.853	510.028
27067	ENSG00000006025	OSBPL7	protein_coding	544.779	-1.03132	0.392143	-2.62996	0.00853945	0.0881661	857.874	471.369	408.191	460.833	959.747	347.221	163.171	333.324	340.151	351.573
19025	ENSG00000165879	FRAT1	protein_coding	80.2966	-0.940151	0.357558	-2.62936	0.00855449	0.0882758	154.384	60.4128	56.9079	71.095	122.894	62.5292	42.1888	31.298	39.023	59.4207
6027	ENSG00000168301	KCTD6	protein_coding	46.7742	1.13334	0.431523	2.62636	0.00863031	0.088952	33.3803	35.8002	42.154	47.1112	20.4824	68.4143	130.289	68.8556	89.753	47.0414
8962	ENSG00000145730	PAM	protein_coding	373.86	1.49981	0.571074	2.6263	0.00863198	0.088952	61.7536	275.214	337.935	304.081	51.206	1116.7	675.021	665.865	736.235	101.51
24736	ENSG00000103528	SYT17	protein_coding	39.5906	-1.38805	0.52853	-2.62624	0.00863335	0.088952	50.905	42.5127	56.2053	87.3698	52.6691	42.667	11.1676	32.8629	26.0154	4.95173
6581	ENSG00000158258	CLSTN2	protein_coding	6.48472	2.78565	1.06104	2.62539	0.00865486	0.0891277	0	4.47502	1.40513	1.71313	0	10.2989	7.44508	9.3894	17.5604	2.47586
19026	ENSG00000181274	FRAT2	protein_coding	356.952	-0.921228	0.351138	-2.62355	0.00870181	0.0895651	659.261	334.881	385.006	340.914	643.733	255.266	172.478	198.742	196.416	458.035
14193	ENSG00000155970	MICU3	protein_coding	4.73136	2.82334	1.07626	2.62328	0.00870864	0.0895893	2.50352	4.47502	0.702567	0.856567	0	8.09201	18.6127	4.6947	13.0077	2.47586
573	ENSG00000117713	ARID1A	protein_coding	419.705	-0.675268	0.257572	-2.62167	0.00875011	0.0899697	473.166	566.09	522.007	578.183	488.652	316.324	461.595	278.552	313.485	302.055
9536	ENSG00000164330	EBF1	protein_coding	53.887	2.02515	0.772833	2.62043	0.00878199	0.0901122	1.66902	21.6293	0	8.56567	13.1673	22.8048	34.1233	13.3016	39.6734	29.7104
12548	ENSG00000105974	CAV1	protein_coding	261.872	1.08892	0.415504	2.62071	0.00877461	0.0901122	109.321	368.443	112.411	216.711	102.412	259.68	424.37	494.508	562.582	158.455
24126	ENSG00000185442	FAM174B	protein_coding	235.448	-1.33887	0.51092	-2.6205	0.00878003	0.0901122	447.296	95.4671	187.585	202.15	598.379	107.403	116.019	89.9817	92.3545	99.0346
26838	ENSG00000171346	KRT15	protein_coding	49.4995	1.3102	0.499937	2.62073	0.00877427	0.0901122	34.2148	10.4417	11.9436	10.2788	36.5757	85.334	70.7283	55.5539	16.2596	34.6621
17055	ENSG00000166840	GLYATL1	protein_coding	10.4299	2.65687	1.014	2.62019	0.0087881	0.0901287	8.34508	4.47502	7.02567	3.42627	0	5.14946	8.68593	56.3364	33.1696	9.90346
1453	ENSG00000137992	DBT	protein_coding	146.744	-0.721479	0.275398	-2.61977	0.00879899	0.0901942	134.356	186.459	210.77	200.437	160.933	97.8398	83.7572	133.016	94.9561	141.124
16049	ENSG00000256040	PAPPA-AS1	antisense	8.88489	2.82125	1.07752	2.61829	0.00883717	0.0904945	1.66902	4.47502	0.702567	4.28283	1.46303	5.8851	67.0058	10.9543	22.7634	0
23267	ENSG00000169105	CHST14	protein_coding	47.2527	1.19645	0.456961	2.61828	0.00883734	0.0904945	17.5247	45.496	40.7489	53.1071	13.1673	111.817	88.7206	64.9433	98.208	32.1862
26616	ENSG00000108700	CCL8	protein_coding	17.3687	3.29761	1.25957	2.61805	0.00884348	0.0905111	0	0	1.40513	6.85253	2.92606	1.47128	13.6493	24.2559	42.9254	9.90346
23528	ENSG00000171016	PYGO1	protein_coding	8.67166	2.75382	1.05197	2.61777	0.00885063	0.0905379	0.834508	12.6792	0	8.56567	0	22.0691	17.9923	17.9963	15.6092	4.95173
17092	ENSG00000166928	MS4A14	protein_coding	10.8115	1.7698	0.676257	2.61705	0.00886944	0.0906377	1.66902	14.9167	3.51283	7.7091	1.46303	8.09201	11.1676	22.691	34.4704	7.42759
22923	ENSG00000185024	BRF1	protein_coding	299.14	-0.72029	0.27522	-2.61714	0.00886693	0.0906377	383.874	234.193	308.427	277.528	569.118	166.99	169.376	238.647	181.457	304.531
9720	ENSG00000175309	PHYKPL	protein_coding	841.384	-0.987619	0.377491	-2.61628	0.00888948	0.0907962	1139.94	792.825	754.557	700.672	1278.69	660.603	377.838	685.426	520.307	217.876
1186	ENSG00000079739	PGM1	protein_coding	455.936	-0.841924	0.321877	-2.61567	0.00890532	0.0909115	459.814	545.207	695.541	502.805	452.076	289.841	157.588	560.234	319.339	215.4
471	ENSG00000159189	C1QC	protein_coding	624.921	1.35505	0.518195	2.61494	0.00892432	0.091059	77.6092	607.111	374.468	262.966	130.21	908.513	335.649	968.673	996.388	289.676
28141	ENSG00000268573	AC011815.1	lincRNA	10.9453	-2.05495	0.786099	-2.61412	0.00894588	0.0912324	20.8627	21.6293	25.2924	22.2707	5.85212	5.14946	2.48169	4.6947	1.30077	12.3793
21292	ENSG00000132970	WASF3	protein_coding	11.0606	2.14231	0.819794	2.61323	0.00896896	0.0914213	0.834508	5.22086	7.02567	6.85253	1.46303	8.09201	42.1888	37.5576	18.8611	2.47586
5494	ENSG00000177463	NR2C2	protein_coding	431.124	-0.896912	0.34355	-2.61071	0.00903534	0.092051	509.884	615.315	585.238	731.508	411.111	384.739	565.206	353.667	359.662	86.6553
557	ENSG00000236155	AL355877.1	transcribed_unprocessed_pseudogene	5.33012	3.34755	1.28255	2.61007	0.00905228	0.092154	0.834508	0	0	1.71313	0	3.67819	2.48169	1.5649	1.30077	47.0414
4278	ENSG00000136689	IL1RN	protein_coding	67.7962	1.94108	0.743713	2.60998	0.00905467	0.092154	37.5528	48.4794	8.4308	13.7051	108.264	67.6787	238.863	180.746	115.768	37.138
9286	ENSG00000256453	DND1	protein_coding	87.9638	-1.43077	0.548272	-2.6096	0.00906473	0.0922095	166.902	115.605	118.031	175.596	86.3187	120.645	41.5684	61.0311	76.7453	0
4690	ENSG00000128710	HOXD10	protein_coding	36.8005	2.73357	1.04799	2.6084	0.0090967	0.0924877	1.66902	5.22086	20.3744	7.7091	14.6303	59.5867	54.5973	71.9854	29.2673	37.138
26904	ENSG00000197291	RAMP2-AS1	lincRNA	9.96075	2.35616	0.903433	2.60801	0.00910712	0.0925467	0.834508	12.6792	0.702567	11.1354	0	12.5058	27.2986	16.4314	26.0154	4.95173
4814	ENSG00000115415	STAT1	protein_coding	837.579	1.1099	0.425626	2.60769	0.00911559	0.0925857	384.708	1082.96	572.592	615.015	283.828	994.582	1757.04	1409.97	1473.12	562.021
9373	ENSG00000113555	PCDH12	protein_coding	65.0567	1.15007	0.441137	2.60707	0.00913208	0.0926913	41.7254	62.6503	20.3744	25.697	70.2254	86.8052	102.37	62.596	150.239	69.3242
13359	ENSG00000269313	MAGIX	protein_coding	136.706	-1.83001	0.701972	-2.60695	0.00913525	0.0926913	67.5951	9.69588	21.077	80.5173	465.243	9.56329	11.788	29.7331	15.6092	49.5173
10624	ENSG00000069122	ADGRF5	protein_coding	109.268	1.45039	0.556654	2.60555	0.00917268	0.0930239	29.2078	190.934	46.3694	79.6607	13.1673	120.645	423.749	129.104	226.334	37.138
29240	ENSG00000171700	RGS19	protein_coding	57.0506	1.55652	0.59754	2.60488	0.00919061	0.0931586	20.0282	70.1087	32.3181	48.8243	7.31515	86.8052	77.553	71.2029	91.0538	91.607
21739	ENSG00000134901	KDELC1	protein_coding	30.5674	1.57187	0.603729	2.60359	0.00922519	0.0934617	24.2007	34.3085	14.7539	19.701	10.2412	42.667	79.4142	39.9049	98.8584	32.1862
26488	ENSG00000266642	AC024267.6	antisense	70.229	-1.93862	0.744942	-2.60238	0.00925795	0.0937461	171.909	39.5294	49.8822	44.5415	200.435	18.3909	26.0578	40.6874	23.4138	0
26330	ENSG00000171916	LGALS9C	protein_coding	191.065	-1.00719	0.387127	-2.6017	0.00927636	0.093851	87.6233	63.3961	109.6	90.7961	64.3733	52.9659	15.5106	71.2029	44.8765	34.6621
29180	ENSG00000228705	LINC00659	antisense	7.16587	3.76545	1.44733	2.60165	0.00927769	0.093851	3.33803	0.745837	0	0	0	11.0346	3.10212	9.3894	0.650384	79.2277
2917	ENSG00000163050	COQ8A	protein_coding	829.115	-0.914172	0.351632	-2.5998	0.00932792	0.0943115	988.057	589.211	862.752	711.807	1887.31	458.302	404.516	389.66	515.104	807.132
28862	ENSG00000132821	VSTM2L	protein_coding	17.0563	2.28717	0.879826	2.59957	0.00933416	0.0943269	2.50352	6.71253	2.1077	2.5697	10.2412	17.6553	57.079	7.04205	98.8584	2.47586
11352	ENSG00000112541	PDE10A	protein_coding	10.5297	2.07806	0.799677	2.59862	0.00935997	0.0944923	4.17254	8.95004	4.2154	6.85253	0	27.9542	27.9191	10.1718	29.9177	4.95173
15766	ENSG00000148082	SHC3	protein_coding	11.2465	1.64094	0.631466	2.59862	0.00935984	0.0944923	6.67606	6.71253	2.81027	4.28283	4.38909	12.5058	20.474	5.47715	37.7223	12.3793
28835	ENSG00000131043	AAR2	protein_coding	264.963	0.626967	0.241323	2.59804	0.00937572	0.0946035	271.215	220.022	259.247	221.851	222.38	316.324	449.807	284.029	372.67	445.656
25124	ENSG00000155330	C16orf87	protein_coding	53.9382	1.2763	0.491431	2.59712	0.00940101	0.0948024	45.8979	60.4128	37.9386	51.394	13.1673	137.564	106.092	83.7221	68.9407	89.1311
28558	ENSG00000234900	AL135937.1	lincRNA	14.8943	-2.97725	1.14643	-2.59697	0.00940491	0.0948024	58.4155	18.6459	18.9693	6.85253	23.4085	3.67819	1.24085	14.0841	5.20307	0
16032	ENSG00000136883	KIF12	protein_coding	431.809	-1.32267	0.50936	-2.59672	0.00941179	0.094824	381.37	240.159	540.976	398.304	902.689	167.725	19.2331	428	427.953	173.311
17065	ENSG00000110042	DTX4	protein_coding	606.833	-0.795733	0.306507	-2.59613	0.00942799	0.0949394	828.666	545.207	712.403	741.787	735.904	308.968	585.06	410.786	488.438	307.007
8398	ENSG00000154124	OTULIN	protein_coding	148.958	0.833179	0.321007	2.59552	0.00944489	0.0950617	121.004	111.13	130.677	121.632	122.894	176.553	353.021	197.96	182.108	195.593
30536	ENSG00000197408	CYP2B6	protein_coding	67.5038	1.5484	0.596961	2.59381	0.00949195	0.0954874	63.4226	22.3751	30.9129	21.4142	105.338	70.6212	173.719	39.9049	141.784	133.697
2937	ENSG00000181873	IBA57	protein_coding	135.841	-1.00563	0.387819	-2.59304	0.00951314	0.0956525	185.261	99.9421	120.139	90.7961	308.699	34.575	63.2832	104.066	54.6323	168.359
27889	ENSG00000262001	DLGAP1-AS2	antisense	162.468	-1.60841	0.620333	-2.59282	0.00951937	0.095667	420.592	167.067	174.939	288.663	596.916	177.289	91.8227	89.9817	37.7223	106.462
23796	ENSG00000137868	STRA6	protein_coding	32.6013	1.97072	0.760324	2.59195	0.00954336	0.09586	13.3521	6.71253	22.4821	7.7091	49.743	64.7361	40.948	110.325	153.491	9.90346
12328	ENSG00000106258	CYP3A5	protein_coding	1425.71	-1.01194	0.390447	-2.59173	0.00954936	0.0958721	1116.57	939.754	1117.78	738.361	2703.68	1550.72	255.615	637.697	354.459	685.814
14078	ENSG00000176595	KBTBD11	protein_coding	183.506	-1.28308	0.495319	-2.5904	0.00958631	0.0961466	264.539	271.485	218.498	206.433	191.657	72.0925	60.8015	187.006	53.9819	116.366
15322	ENSG00000173068	BNC2	protein_coding	36.0496	1.58622	0.612342	2.59041	0.00958622	0.0961466	10.8486	44.0044	3.51283	26.5536	14.6303	55.1728	109.815	25.0384	109.265	7.42759
18344	ENSG00000120594	PLXDC2	protein_coding	226.104	1.24536	0.480811	2.59012	0.00959414	0.0961769	87.6233	211.072	141.216	222.707	52.6691	416.371	566.447	230.823	640.628	71.8001
1959	ENSG00000143546	S100A8	protein_coding	43.3948	1.86524	0.720281	2.5896	0.00960885	0.0962521	11.6831	32.8168	1.40513	57.39	29.2606	64.7361	57.079	108.761	52.0307	151.028
25202	ENSG00000103494	RPGRIP1L	protein_coding	50.9626	1.35137	0.521865	2.58951	0.00961126	0.0962521	39.2219	54.4461	40.0463	59.1031	8.77818	215.542	98.0269	73.5503	53.3315	71.8001
1290	ENSG00000117114	ADGRL2	protein_coding	77.5608	1.75617	0.678604	2.58791	0.00965596	0.0966513	8.34508	70.1087	34.4258	77.9476	5.85212	77.242	151.383	112.673	193.814	34.6621
[truncated: 30,683 more rows]

## Sheet: TN
	ENSEMBL	gene_name	gene_biotype	baseMean	log2FoldChange	lfcSE	stat	pvalue	padj	PN1	PN2	PN3	PN4	PN5	PT1	PT2	PT3	PT4	PT5
19158	ENSG00000107954	NEURL1	protein_coding	345.306	-4.57807	0.374718	-12.2174	2.51062e-34	5.18268e-30	252.997	333.225	558.015	631.985	1070.48	8.82765	12.4085	31.298	33.1696	32.1862
25244	ENSG00000205358	MT1H	protein_coding	482.24	-5.15767	0.424697	-12.1444	6.1453e-34	6.34287e-30	158.214	577.288	2405.67	1910.58	1518.23	4.41383	9.30636	64.9433	54.6323	66.8483
27523	ENSG00000183034	OTOP2	protein_coding	280.195	-9.81457	0.870496	-11.2747	1.74989e-29	1.2041e-25	32.0803	575.021	790.866	843.188	1950.54	0	0	0	0.650384	7.42759
26695	ENSG00000278535	DHRS11	protein_coding	738.519	-2.79201	0.257466	-10.8442	2.12495e-27	1.09663e-23	1544.23	1116.8	1697.47	1616.52	2290.21	185.381	158.208	247.254	187.311	482.794
948	ENSG00000142959	BEST4	protein_coding	308.866	-6.22655	0.585428	-10.6359	2.02894e-26	8.37667e-23	104.261	1375.22	1381.95	789.575	880.058	3.67819	13.6493	9.3894	11.7069	17.3311
25344	ENSG00000168748	CA7	protein_coding	365.058	-6.27857	0.598914	-10.4833	1.03128e-25	3.54813e-22	92.5954	1380.5	1561.06	939.042	1345.82	6.62074	2.48169	20.3437	18.8611	17.3311
23937	ENSG00000103888	CEMIP	protein_coding	500.228	5.6155	0.536898	10.4592	1.33024e-25	3.92288e-22	36.4549	13.601	2.75563	3.24928	0	971.042	463.456	350.538	393.482	121.317
31928	ENSG00000100079	LGALS2	protein_coding	966.993	-5.19724	0.501571	-10.3619	3.69492e-25	9.53429e-22	489.953	523.64	2916.83	4290.68	5311.23	19.1266	3.72254	178.399	59.185	227.78
9807	ENSG00000164379	FOXQ1	protein_coding	165.267	6.71035	0.660279	10.1629	2.90292e-24	6.65834e-21	7.29097	8.31174	0	0	2.57327	601.752	519.295	334.106	312.835	76.7518
25237	ENSG00000205364	MT1M	protein_coding	790.705	-5.31483	0.529249	-10.0422	9.94078e-24	2.05207e-20	75.8261	963.406	2708.78	3512.47	3517.66	8.82765	7.44508	103.283	61.7865	94.0829
9201	ENSG00000120708	TGFBI	protein_coding	2643.9	3.36731	0.336905	9.99485	1.60537e-23	3.0127e-20	737.847	738.989	498.769	303.808	177.556	13323.9	4589.89	3790.97	3925.72	1889.08
10015	ENSG00000146039	SLC17A4	protein_coding	354.328	-4.90327	0.49571	-9.89141	4.53598e-23	7.80303e-20	371.111	630.181	2025.39	1405.31	470.908	6.62074	8.68593	92.3291	30.5681	47.0414
27801	ENSG00000141574	SECTM1	protein_coding	801.981	-3.90469	0.401553	-9.72399	2.38257e-22	3.78335e-19	777.218	961.14	3301.24	1897.58	3589.71	47.8164	48.393	273.075	152.19	198.069
30932	ENSG00000269404	SPIB	protein_coding	336.127	-6.61037	0.684574	-9.65618	4.62784e-22	6.82375e-19	60.5151	497.193	845.978	1532.04	1904.22	7.35638	3.10212	14.0841	1.30077	19.8069
5331	ENSG00000146205	ANO7	protein_coding	446.682	-4.30567	0.446456	-9.6441	5.20651e-22	7.1652e-19	304.763	394.43	535.97	557.252	877.485	7.35638	12.4085	64.9433	37.7223	29.7104
12108	ENSG00000006704	GTF2IRD1	protein_coding	220.107	3.15074	0.327884	9.60932	7.30273e-22	9.42189e-19	55.4114	61.2046	42.7123	21.1203	33.4525	467.866	397.071	316.892	457.87	257.49
25440	ENSG00000062038	CDH3	protein_coding	143.828	6.12265	0.6427	9.52644	1.62767e-21	1.97647e-18	4.37458	11.3342	4.13345	0	0	152.277	326.963	492.161	211.375	242.635
5778	ENSG00000241186	TDGF1	protein_coding	90.0565	3.898	0.415843	9.37375	7.00031e-21	8.02818e-18	9.47827	17.3791	15.156	8.1232	0	180.231	198.536	166.662	163.246	47.0414
877	ENSG00000044012	GUCA2B	protein_coding	806.148	-7.40135	0.797027	-9.2862	1.59891e-20	1.73717e-17	216.542	538.752	6601.11	1590.52	2954.11	1.47128	0	46.1645	10.4061	49.5173
26954	ENSG00000131096	PYY	protein_coding	3544.75	-7.47549	0.8078	-9.25413	2.1599e-20	2.22934e-17	123.947	935.449	5347.3	19035.9	27171.1	2.94255	6.82466	75.8976	20.8123	180.738
11854	ENSG00000122641	INHBA	protein_coding	230.445	6.56389	0.729599	8.99658	2.32863e-19	2.28905e-16	16.0401	3.02245	0	6.49856	2.57327	400.923	1912.77	182.311	796.721	79.2277
24573	ENSG00000153446	C16orf89	protein_coding	53.366	-5.91665	0.658104	-8.99045	2.46216e-19	2.31029e-16	41.5586	63.4715	144.671	284.312	216.155	1.47128	0	5.47715	1.95115	4.95173
25243	ENSG00000125144	MT1G	protein_coding	2528.65	-4.43421	0.493533	-8.98463	2.59611e-19	2.33007e-16	1058.65	2844.88	10310.2	11200.3	6538.68	34.575	31.0212	666.647	529.413	943.304
17800	ENSG00000137673	MMP7	protein_coding	266.237	6.7986	0.760886	8.93511	4.06777e-19	3.49879e-16	5.83278	3.77806	0	4.87392	5.14654	178.76	1335.77	378.706	519.657	79.2277
26330	ENSG00000171916	LGALS9C	protein_coding	191.065	-3.38829	0.382675	-8.85422	8.42735e-19	6.90163e-16	193.211	309.801	620.017	526.384	581.559	52.9659	15.5106	71.2029	44.8765	34.6621
32528	ENSG00000160191	PDE9A	protein_coding	669.671	-3.58503	0.405053	-8.85076	8.69266e-19	6.90163e-16	1576.31	759.391	928.647	1353.33	2601.58	113.288	49.0135	96.2413	156.092	148.552
14893	ENSG00000164932	CTHRC1	protein_coding	190.09	6.06883	0.689757	8.7985	1.3866e-18	9.87018e-16	11.6656	17.3791	6.88908	1.62464	0	735.638	681.846	113.455	1168.74	29.7104
29282	ENSG00000197766	CFD	protein_coding	2023.25	-5.01771	0.570058	-8.80211	1.3427e-18	9.87018e-16	608.067	1101.68	6442.66	8529.36	11085.6	139.771	21.7148	202.655	130.727	311.959
31661	ENSG00000099953	MMP11	protein_coding	734.374	5.14751	0.584711	8.80352	1.32596e-18	9.87018e-16	29.893	49.1148	30.3119	76.3581	56.6119	2101.72	2270.75	509.375	5182.91	267.393
8322	ENSG00000174358	SLC6A19	protein_coding	468.613	-6.98641	0.796334	-8.77322	1.73627e-18	1.19473e-15	5832.78	442.789	321.031	196.581	200.715	2.94255	0.620424	11.7367	4.55269	4.95173
25242	ENSG00000198417	MT1F	protein_coding	394.773	-3.60712	0.414887	-8.69421	3.49249e-18	2.32566e-15	375.485	649.827	1709.87	1259.1	458.042	17.6553	37.2254	134.581	103.411	121.317
3270	ENSG00000163032	VSNL1	protein_coding	123.104	4.45918	0.515737	8.64622	5.32327e-18	3.43401e-15	1.45819	21.9128	15.156	19.4957	7.71981	205.243	328.825	189.353	453.968	198.069
26942	ENSG00000175832	ETV4	protein_coding	267.432	3.86866	0.45059	8.58575	9.0247e-18	5.47932e-15	51.0368	13.601	30.3119	11.3725	54.0387	844.512	298.424	203.437	172.352	1047.29
30491	ENSG00000275395	FCGBP	protein_coding	25490.8	-4.65072	0.541599	-8.58703	8.92458e-18	5.47932e-15	13675.7	10246.9	28734.3	46087.8	96304.6	641.476	160.069	2162.69	1062.73	5352.82
20144	ENSG00000167767	KRT80	protein_coding	85.7383	8.05654	0.940151	8.56941	1.04013e-17	6.13472e-15	1.45819	0.755613	0	0	0	157.426	280.432	121.28	144.385	126.269
11402	ENSG00000186340	THBS2	protein_coding	445.342	5.16197	0.606576	8.51001	1.73918e-17	9.97273e-15	52.495	28.7133	11.0225	35.7421	5.14654	1811.88	2400.42	94.6764	2044.81	91.607
10989	ENSG00000123500	COL10A1	protein_coding	145.717	9.0165	1.07598	8.37983	5.30058e-17	2.87947e-14	0	1.51123	0	0	0	406.072	1092.57	15.649	656.238	9.90346
24895	ENSG00000197165	SULT1A2	protein_coding	203.93	-4.85767	0.57964	-8.3805	5.27039e-17	2.87947e-14	462.977	327.18	766.065	524.759	676.77	7.35638	8.68593	29.7331	10.4061	66.8483
7607	ENSG00000163739	CXCL1	protein_coding	668.267	3.5423	0.424629	8.34213	7.29668e-17	3.86219e-14	307.679	166.99	39.9566	162.464	66.905	1271.92	1631.09	1030.49	1897.17	1844.52
10467	ENSG00000164530	PI16	protein_coding	91.2521	-5.88607	0.712465	-8.26156	1.43784e-16	7.42035e-14	18.9565	71.7832	96.4471	781.452	373.124	2.20691	1.86127	0	10.4061	2.47586
2153	ENSG00000162706	CADM3	protein_coding	82.8596	-4.46744	0.541866	-8.24456	1.65771e-16	8.34639e-14	104.99	142.055	197.028	324.928	388.564	8.09201	8.68593	8.60695	29.2673	0
19195	ENSG00000150593	PDCD4	protein_coding	1983.2	-2.07209	0.255457	-8.11132	5.00708e-16	2.46098e-13	2113.65	3942.79	4200.96	3492.98	2802.29	819.5	509.988	1147.85	779.811	698.194
8589	ENSG00000164283	ESM1	protein_coding	46.09	7.84429	0.973441	8.05831	7.73579e-16	3.71372e-13	1.45819	0.755613	0	0	0	111.817	165.033	167.444	151.539	71.8001
7604	ENSG00000169429	CXCL8	protein_coding	480.098	6.39905	0.796507	8.03389	9.44336e-16	4.43044e-13	47.3913	21.9128	5.51126	1.62464	2.57327	330.301	4101	502.333	1886.11	175.786
10014	ENSG00000079689	SCGN	protein_coding	67.9929	-5.49901	0.686084	-8.01507	1.10074e-15	5.03158e-13	30.6221	188.903	245.251	409.409	118.37	2.94255	0.620424	7.04205	9.75576	2.47586
25236	ENSG00000169715	MT1E	protein_coding	2026.36	-3.19793	0.399103	-8.0128	1.12122e-15	5.03158e-13	1225.61	2800.3	7630.34	7705.67	2683.92	122.116	152.004	848.176	719.325	955.684
878	ENSG00000197273	GUCA2A	protein_coding	5112.41	-6.1781	0.771589	-8.00699	1.17549e-15	5.05534e-13	1813.27	3974.52	26222.6	15047.4	26810.9	8.09201	16.131	693.251	148.938	866.553
25246	ENSG00000187193	MT1X	protein_coding	302.837	-3.5913	0.448376	-8.00957	1.15108e-15	5.05534e-13	159.672	371.762	1253.81	1333.83	576.412	25.7473	32.262	55.5539	51.3803	138.648
26824	ENSG00000108244	KRT23	protein_coding	65.0385	8.24814	1.03202	7.99223	1.3252e-15	5.58289e-13	0.729097	0.755613	0	0	0	257.473	14.2697	173.704	161.946	302.055
6963	ENSG00000157005	SST	protein_coding	163.708	-7.08159	0.891166	-7.94643	1.91967e-15	7.92556e-13	149.465	312.824	588.327	1229.85	146.676	0	0	4.6947	9.10538	9.90346
13838	ENSG00000171388	APLN	protein_coding	32.2481	6.46509	0.81571	7.92572	2.26821e-15	9.18092e-13	0.729097	0.755613	0	3.24928	0	26.483	140.216	89.9817	176.904	19.8069
26852	ENSG00000141756	FKBP10	protein_coding	556.981	2.46023	0.312989	7.86044	3.82798e-15	1.51963e-12	128.321	177.569	219.073	424.031	226.448	762.121	1207.34	1245.66	1326.13	1713.3
20978	ENSG00000122971	ACADS	protein_coding	1977.2	-3.71852	0.473876	-7.84705	4.25948e-15	1.65903e-12	1079.06	1074.48	3597.48	4804.06	10339.4	194.944	120.983	331.759	178.205	547.166
17811	ENSG00000149968	MMP3	protein_coding	566.706	7.8262	0.999367	7.83115	4.83413e-15	1.84364e-12	25.5184	3.02245	0	3.24928	2.57327	132.415	4531.57	336.453	2629.5	168.359
28663	ENSG00000170373	CST1	protein_coding	236.911	7.95948	1.01665	7.82914	4.91209e-15	1.84364e-12	1.45819	3.77806	0	1.62464	0	2526.18	190.47	590.75	59.185	89.1311
6977	ENSG00000163347	CLDN1	protein_coding	269.132	6.47006	0.835791	7.74124	9.84505e-15	3.62913e-12	77.2843	22.6684	0	0	0	1034.31	1185.01	263.686	665.343	373.856
21348	ENSG00000120694	HSPH1	protein_coding	844.86	2.71171	0.351486	7.71501	1.20975e-14	4.3812e-12	413.398	375.54	265.918	131.596	146.676	2193.67	2010.17	914.684	1120.61	2052.49
16442	ENSG00000188833	ENTPD8	protein_coding	869.021	-3.59554	0.478614	-7.51239	5.80584e-14	2.06638e-11	406.107	695.164	1871.07	2087.66	4323.09	62.5292	26.6782	230.823	171.701	309.483
22711	ENSG00000100604	CHGA	protein_coding	1821.97	-6.24233	0.832028	-7.50255	6.25881e-14	2.18984e-11	2182.92	3453.91	5606.33	10735.6	4261.33	6.62074	0.620424	358.362	98.8584	128.745
10592	ENSG00000181577	C6orf223	protein_coding	108.574	5.40004	0.728474	7.41281	1.23648e-13	4.25409e-11	29.893	1.51123	1.37782	4.87392	0	236.14	273.607	102.501	158.043	376.331
17933	ENSG00000110244	APOA4	protein_coding	393.571	-27.4294	3.71536	-7.38269	1.55126e-13	5.16494e-11	5886	0	0	0	0	0	0	0	0	0
32495	ENSG00000182240	BACE2	protein_coding	1006.18	1.74064	0.235758	7.38318	1.54554e-13	5.16494e-11	367.465	407.275	424.367	320.054	169.836	1228.51	1062.79	1266	1198.66	794.753
11667	ENSG00000050344	NFE2L3	protein_coding	371.053	3.02466	0.411878	7.34359	2.0794e-13	6.74149e-11	223.104	134.499	74.402	43.8653	23.1594	1010.77	1457.38	383.4	452.667	425.849
12557	ENSG00000105989	WNT2	protein_coding	44.9948	7.91116	1.07739	7.3429	2.09008e-13	6.74149e-11	0	0.755613	0	0	2.57327	139.771	155.106	57.9013	291.372	19.8069
1473	ENSG00000060718	COL11A1	protein_coding	166.947	7.20589	0.98191	7.33864	2.15768e-13	6.85246e-11	0.729097	3.02245	1.37782	3.24928	5.14654	875.409	921.329	29.7331	608.76	17.3311
20298	ENSG00000139540	SLC39A5	protein_coding	1251.58	-2.06336	0.281636	-7.32631	2.36568e-13	7.3992e-11	1491	1049.55	2401.53	2951.97	3610.3	386.21	372.875	449.909	528.762	933.401
18017	ENSG00000172367	PDZD3	protein_coding	373.205	-2.52021	0.347524	-7.2519	4.10961e-13	1.26619e-10	395.171	791.882	1077.45	526.384	694.783	55.9085	78.1734	327.064	128.776	84.1794
24898	ENSG00000196502	SULT1A1	protein_coding	1127.22	-2.84578	0.39283	-7.24428	4.34729e-13	1.31972e-10	673.686	2219.23	1800.8	1722.12	5053.9	110.346	209.083	227.693	258.853	873.98
24403	ENSG00000167964	RAB26	protein_coding	125.545	-3.58276	0.498435	-7.18802	6.5738e-13	1.96671e-10	90.4081	97.4741	250.762	284.312	319.085	19.1266	1.24085	21.9086	15.6092	47.0414
25165	ENSG00000140807	NKD1	protein_coding	564.495	4.22078	0.588736	7.16923	7.54206e-13	2.22415e-10	38.6422	19.6459	22.045	16.2464	28.306	1538.22	153.865	730.026	167.799	299.58
25938	ENSG00000167723	TRPV3	protein_coding	32.579	-3.49923	0.488777	-7.15916	8.11703e-13	2.33594e-10	84.5753	98.2297	2.75563	71.4842	128.663	5.14946	13.0289	0	7.15423	9.90346
30661	ENSG00000273777	CEACAM20	protein_coding	31.2742	-23.0002	3.21292	-7.15865	8.14744e-13	2.33594e-10	459.331	0	0	1.62464	0	0	0	0	0	0
2637	ENSG00000133048	CHI3L1	protein_coding	107.005	5.03177	0.704502	7.14231	9.17758e-13	2.59524e-10	11.6656	3.77806	2.75563	1.62464	7.71981	57.3797	652.065	291.854	138.532	108.938
28505	ENSG00000088826	SMOX	protein_coding	117.079	2.26105	0.31773	7.11628	1.10882e-12	3.09317e-10	37.184	33.247	35.8232	29.2435	56.6119	151.541	194.813	179.963	126.175	257.49
10599	ENSG00000112759	SLC29A1	protein_coding	310.246	2.41815	0.343722	7.03517	1.99017e-12	5.47774e-10	129.05	159.434	111.603	87.7306	33.4525	372.968	691.152	604.834	552.826	453.083
21745	ENSG00000125255	SLC10A2	protein_coding	148.639	-26.2814	3.73833	-7.03024	2.06174e-12	5.60006e-10	2229.58	0	0	0	0	0	0	0	0	0
332	ENSG00000162460	TMEM82	protein_coding	160.444	-4.25225	0.606124	-7.01547	2.29169e-12	6.14382e-10	183.003	64.2271	472.591	341.175	1070.48	1.47128	13.0289	34.4278	9.75576	34.6621
16954	ENSG00000165905	LARGE2	protein_coding	83.5357	4.04756	0.577508	7.00867	2.40586e-12	6.36721e-10	5.10368	16.6235	8.26689	25.9942	5.14654	266.301	290.979	226.128	97.5576	37.138
30443	ENSG00000171747	LGALS4	protein_coding	16482.8	-2.29428	0.328427	-6.98566	2.83517e-12	7.40841e-10	14054.1	24172.8	46932.5	27722.9	25900	4394.7	4084.87	9806.45	3907.51	6972.03
10517	ENSG00000112559	MDFI	protein_coding	118.38	4.71092	0.675548	6.97348	3.09196e-12	7.97841e-10	6.56188	10.5786	1.37782	16.2464	10.2931	142.714	183.025	161.967	215.277	539.738
15147	ENSG00000203499	IQANK1	protein_coding	98.4422	3.04916	0.439999	6.92991	4.21096e-12	1.07317e-09	17.4983	24.1796	15.156	9.74784	23.1594	131.679	189.229	323.934	65.0384	99.0346
7724	ENSG00000118777	ABCG2	protein_coding	95.3223	-4.32395	0.626202	-6.90505	5.01861e-12	1.2634e-09	802.736	281.088	152.937	55.2378	43.7456	12.5058	3.10212	19.5612	7.80461	4.95173
25809	ENSG00000178773	CPNE7	protein_coding	155.049	4.9671	0.719982	6.89892	5.23978e-12	1.30319e-09	24.7893	4.53368	5.51126	12.9971	2.57327	111.817	219.01	495.291	79.9972	787.325
25434	ENSG00000103056	SMPD3	protein_coding	454.251	-2.08805	0.302849	-6.89468	5.39872e-12	1.32673e-09	879.292	614.313	654.462	817.194	980.416	129.472	243.206	251.949	184.059	128.745
18802	ENSG00000122861	PLAU	protein_coding	371.692	3.6081	0.523543	6.89171	5.51269e-12	1.33881e-09	127.592	126.943	68.8908	40.616	18.0129	518.625	1462.34	856	1564.17	277.297
29067	ENSG00000101115	SALL4	protein_coding	56.6891	5.65039	0.820428	6.88713	5.69295e-12	1.36651e-09	1.45819	1.51123	0	9.74784	5.14654	211.128	330.686	79.0274	93.6553	37.138
12616	ENSG00000135245	HILPDA	protein_coding	88.3644	2.89952	0.421146	6.88482	5.78587e-12	1.37285e-09	34.9967	33.247	23.4229	11.3725	7.71981	247.174	168.135	110.325	199.018	106.462
17601	ENSG00000166391	MOGAT2	protein_coding	679.396	-2.75527	0.40057	-6.87837	6.05415e-12	1.42018e-09	2208.44	1085.06	761.932	833.441	851.752	149.334	64.5241	192.483	199.668	230.255
20155	ENSG00000185479	KRT6B	protein_coding	103.462	9.05978	1.32646	6.83005	8.48825e-12	1.9688e-09	0	0	0	0	0	993.111	173.719	15.649	48.1284	4.95173
32281	ENSG00000243064	ABCC13	transcribed_unprocessed_pseudogene	49.8379	-4.11114	0.603905	-6.8076	9.92425e-12	2.27629e-09	76.5552	77.8281	187.383	102.352	172.409	2.20691	1.24085	18.7788	5.20307	17.3311
16528	ENSG00000198788	MUC2	protein_coding	8167.39	-3.4293	0.504327	-6.79976	1.04791e-11	2.37715e-09	9833.34	5945.16	10540.3	8342.53	14783.4	197.151	318.898	2084.45	926.797	2059.92
6183	ENSG00000144810	COL8A1	protein_coding	191.829	6.0658	0.893386	6.78967	1.12392e-11	2.52187e-09	31.3512	21.1572	1.37782	0	0	638.534	939.321	169.792	957.365	54.469
25349	ENSG00000172831	CES2	protein_coding	3640.33	-2.89315	0.426413	-6.78487	1.16194e-11	2.57913e-09	7339.09	4057.64	6481.24	8202.81	16728.8	456.095	1106.22	1316.86	1301.42	948.256
701	ENSG00000225828	FAM229A	protein_coding	167.743	-2.68486	0.396127	-6.77777	1.22048e-11	2.67151e-09	102.074	99.7409	275.563	362.295	669.05	32.3681	17.3719	39.1225	55.933	56.9449
32445	ENSG00000159263	SIM2	protein_coding	40.7258	4.08159	0.602297	6.77671	1.22944e-11	2.67151e-09	2.91639	12.0898	9.64471	4.87392	0	64.7361	184.266	78.245	97.5576	111.414
24842	ENSG00000166869	CHP2	protein_coding	825.606	-3.76757	0.558218	-6.74928	1.48582e-11	3.19499e-09	2698.39	2610.64	2400.15	1260.72	1049.89	36.7819	67.6262	221.433	306.331	190.642
24755	ENSG00000169347	GP2	protein_coding	37.441	-5.34509	0.792235	-6.74685	1.51089e-11	3.21538e-09	106.448	43.0699	64.7573	115.349	190.422	0	0.620424	11.7367	5.85346	0
30007	ENSG00000130518	IQCN	protein_coding	69.2256	-3.63843	0.540729	-6.72876	1.71119e-11	3.6045e-09	39.3713	89.1623	147.426	246.945	285.633	8.09201	2.48169	10.9543	37.0719	7.42759
5697	ENSG00000114812	VIPR1	protein_coding	593.797	-2.30709	0.343248	-6.72133	1.80072e-11	3.75477e-09	495.057	1103.95	1065.05	969.91	1757.54	177.289	230.798	309.85	203.57	131.221
6900	ENSG00000145198	VWA5B2	protein_coding	30.8645	-5.47214	0.816633	-6.70086	2.07197e-11	4.27494e-09	29.1639	43.0699	77.1576	147.842	146.676	0	0.620424	3.91225	2.60154	2.47586
27484	ENSG00000180616	SSTR2	protein_coding	40.4701	-4.26457	0.636552	-6.69948	2.0916e-11	4.27494e-09	27.7057	18.1347	95.0692	199.831	200.715	2.94255	3.10212	3.1298	5.20307	9.90346
27800	ENSG00000173762	CD7	protein_coding	224.632	-3.3749	0.504757	-6.68619	2.29055e-11	4.63567e-09	115.197	104.275	458.812	917.922	1253.18	36.0462	25.4374	46.947	29.2673	69.3242
20332	ENSG00000166866	MYO1A	protein_coding	1320.71	-2.71276	0.40602	-6.68135	2.36754e-11	4.73306e-09	4657.47	1454.55	2334.02	1501.17	2961.83	289.106	106.713	680.731	310.233	779.897
29175	ENSG00000101187	SLCO4A1	protein_coding	270.937	2.98162	0.44633	6.6803	2.38453e-11	4.73306e-09	76.5552	57.4266	64.7573	63.361	41.1723	807.73	867.973	107.196	364.215	564.497
16499	ENSG00000099834	CDHR5	protein_coding	5588.88	-3.27233	0.490098	-6.67689	2.44064e-11	4.7983e-09	5837.88	3003.56	9309.9	12210.8	35917.7	783.454	817.718	1473.35	623.068	1485.52
9634	ENSG00000113739	STC2	protein_coding	73.4709	6.77567	1.01776	6.65744	2.78644e-11	5.42645e-09	10.9365	0	1.37782	0	5.14654	75.035	287.877	228.475	198.367	64.3725
5064	ENSG00000163497	FEV	protein_coding	60.0581	-7.55478	1.13641	-6.64794	2.9723e-11	5.73432e-09	10.2074	43.0699	112.981	427.28	301.072	0	0	3.91225	0	0
26670	ENSG00000275431	AC244100.2	antisense	53.0869	-3.68249	0.556456	-6.61776	3.64687e-11	6.97059e-09	69.2643	60.449	135.026	177.086	187.849	5.8851	3.10212	14.8665	26.6657	0
19239	ENSG00000266200	PNLIPRP2	polymorphic_pseudogene	59.0867	-5.89919	0.89316	-6.60485	3.97911e-11	7.53585e-09	505.265	112.586	13.7782	139.719	46.3188	0	1.24085	0	7.15423	4.95173
5353	ENSG00000204099	NEU4	protein_coding	452.365	-3.53918	0.536411	-6.5979	4.17025e-11	7.82604e-09	72.1806	565.954	832.2	1017.02	2292.78	8.82765	9.92678	145.536	124.874	146.076
30820	ENSG00000105464	GRIN2D	protein_coding	101.038	4.59704	0.697463	6.5911	4.36592e-11	8.11943e-09	9.47827	1.51123	0	16.2464	30.8792	170.668	129.669	82.9397	143.085	319.387
305	ENSG00000162493	PDPN	protein_coding	158.892	3.71762	0.56432	6.58779	4.4643e-11	8.18251e-09	65.6188	7.55613	11.0225	43.8653	25.7327	348.692	527.36	263.686	621.117	180.738
8592	ENSG00000145649	GZMA	protein_coding	95.3557	-2.36969	0.359736	-6.5873	4.47911e-11	8.18251e-09	175.712	167.746	279.696	198.206	221.301	52.9659	16.7514	50.0768	42.9254	54.469
18545	ENSG00000204175	GPRIN2	protein_coding	154.141	-2.81232	0.42821	-6.56761	5.11291e-11	9.2584e-09	72.9097	148.1	345.832	227.45	517.227	6.62074	29.1599	70.4205	20.1619	69.3242
21768	ENSG00000187498	COL4A1	protein_coding	1188.68	3.95217	0.60263	6.55821	5.44573e-11	9.77532e-09	760.449	255.397	89.558	69.8595	18.0129	2296.66	5126.56	2115.74	3976.45	418.421
6336	ENSG00000163430	FSTL1	protein_coding	926.873	2.62179	0.400331	6.54906	5.78996e-11	1.03036e-08	546.823	456.39	271.43	253.444	72.0515	2018.59	3162.92	1524.21	3426.87	398.614
26014	ENSG00000132517	SLC52A1	protein_coding	34.5234	-5.28126	0.807097	-6.54353	6.00833e-11	1.06009e-08	110.823	28.7133	20.6672	107.226	167.262	2.20691	0	0.78245	1.95115	12.3793
15682	ENSG00000119121	TRPM6	protein_coding	309.462	-2.94362	0.450099	-6.53994	6.15453e-11	1.07668e-08	110.823	1292.85	1249.68	651.481	658.757	13.9771	130.909	190.135	76.0949	103.986
382	ENSG00000117122	MFAP2	protein_coding	69.0753	3.72835	0.57084	6.53134	6.51845e-11	1.13076e-08	8.74917	27.2021	12.4003	12.9971	5.14654	228.048	169.996	94.6764	362.264	44.5656
31812	ENSG00000185339	TCN2	protein_coding	415.49	-2.70716	0.414932	-6.52434	6.83005e-11	1.17494e-08	826.797	396.697	723.353	908.174	1603.15	176.553	48.393	179.181	135.93	99.0346
22848	ENSG00000166126	AMN	protein_coding	2306.91	-2.89558	0.44479	-6.50998	7.51602e-11	1.28226e-08	1822.01	1539.94	5666.95	4646.47	9099.08	325.152	306.489	1035.96	519.657	510.028
27778	ENSG00000185269	NOTUM	protein_coding	81.9304	6.95505	1.06919	6.50496	7.77161e-11	1.31499e-08	1.45819	0	1.37782	0	0	290.577	7.44508	176.834	22.7634	32.1862
32649	ENSG00000210154	MT-TD	Mt_tRNA	21.9585	-4.0457	0.622528	-6.49883	8.09467e-11	1.35852e-08	18.2274	51.3817	41.3345	58.4871	36.0258	2.20691	3.10212	3.1298	2.60154	0
13342	ENSG00000102109	PCSK1N	protein_coding	462.397	-4.96421	0.764172	-6.49619	8.23788e-11	1.37141e-08	42.2877	218.372	1105.01	2916.23	2454.9	79.4489	14.8902	36.7751	19.5115	14.8552
11610	ENSG00000122691	TWIST1	protein_coding	20.0506	5.04695	0.77836	6.48409	8.92704e-11	1.47425e-08	1.45819	3.02245	0	1.62464	0	27.9542	118.501	10.1718	118.37	4.95173
13113	ENSG00000198759	EGFL6	protein_coding	21.5114	6.51793	1.00615	6.47812	9.28745e-11	1.52159e-08	1.45819	1.51123	0	0	0	60.3223	103.611	44.5996	65.6888	22.2828
386	ENSG00000117115	PADI2	protein_coding	1177.51	-3.95647	0.61095	-6.47592	9.42354e-11	1.53173e-08	156.027	2596.29	2467.67	3567.71	3944.82	107.403	28.5395	337.236	173.002	185.69
24859	ENSG00000103375	AQP8	protein_coding	1746.32	-6.73634	1.04141	-6.46846	9.90048e-11	1.59668e-08	5.83278	3722.15	12178.5	3986.87	2979.85	11.7702	9.92678	204.219	20.8123	217.876
17449	ENSG00000172927	MYEOV	protein_coding	67.6511	3.76193	0.582397	6.45939	1.05123e-10	1.68221e-08	3.64549	27.2021	13.7782	11.3725	10.2931	92.6903	271.746	169.792	152.19	141.124
30568	ENSG00000086548	CEACAM6	protein_coding	4819.9	3.0411	0.471596	6.44854	1.12932e-10	1.79327e-08	1111.87	3607.3	1322.7	552.378	298.499	19829.1	13708.9	4095.34	5650.54	7373.12
9489	ENSG00000113140	SPARC	protein_coding	3979.52	3.1042	0.482174	6.43793	1.21114e-10	1.90852e-08	1767.33	1528.6	624.15	919.547	252.18	10102.5	14734.4	4060.13	18952.8	1416.19
794	ENSG00000183317	EPHA10	protein_coding	351.356	-2.59627	0.4035	-6.43437	1.23983e-10	1.93893e-08	154.569	511.55	615.883	534.507	851.752	47.0808	53.9769	199.525	51.3803	101.51
8453	ENSG00000151388	ADAMTS12	protein_coding	108.063	6.06152	0.945596	6.41026	1.4527e-10	2.25474e-08	10.9365	10.5786	0	0	0	202.3	591.884	57.1188	654.286	29.7104
5751	ENSG00000163815	CLEC3B	protein_coding	124.468	-3.02657	0.473112	-6.39716	1.58293e-10	2.43854e-08	102.803	185.881	376.144	745.71	144.103	20.5979	19.2331	50.0768	28.6169	49.5173
5129	ENSG00000135919	SERPINE2	protein_coding	249.212	3.17266	0.496252	6.39324	1.62409e-10	2.48342e-08	110.094	92.1848	33.0676	38.9914	23.1594	851.868	477.106	363.057	688.106	165.883
27524	ENSG00000182938	OTOP3	protein_coding	15.1445	-7.90521	1.23717	-6.38975	1.66162e-10	2.52212e-08	29.1639	18.1347	38.5788	34.1175	105.504	0	0	0	0	0
4324	ENSG00000171227	TMEM37	protein_coding	395.015	-2.84751	0.446642	-6.37538	1.82511e-10	2.75006e-08	667.124	398.208	852.868	502.014	1574.84	46.3452	37.8458	201.09	54.6323	349.097
6809	ENSG00000163581	SLC2A2	protein_coding	24.3519	-23.7748	3.73835	-6.3597	2.02153e-10	3.02394e-08	365.278	0	0	0	0	0	0	0	0	0
15172	ENSG00000185000	DGAT1	protein_coding	1806.77	-2.06952	0.325497	-6.35803	2.04361e-10	3.03499e-08	2863.17	1116.04	2385	3137.18	7495.93	561.292	393.349	874.779	418.197	1691.02
21122	ENSG00000214039	LINC02418	lincRNA	19.7851	7.54081	1.19075	6.33281	2.40737e-10	3.54967e-08	0	0	0	0	0	93.426	132.771	18.7788	42.9254	7.42759
1880	ENSG00000143387	CTSK	protein_coding	481.806	2.76709	0.439631	6.29411	3.0916e-10	4.52623e-08	215.813	367.228	129.515	76.3581	33.4525	1202.03	1281.8	823.137	2008.39	173.311
17810	ENSG00000196611	MMP1	protein_coding	998.849	6.27659	1.00296	6.25806	3.89802e-10	5.66668e-08	175.712	10.5786	11.0225	19.4957	2.57327	150.07	7627.49	384.965	5013.16	307.007
26034	ENSG00000179314	WSCD1	protein_coding	107.473	-2.37409	0.379446	-6.25674	3.93102e-10	5.67469e-08	163.318	155.656	227.339	172.212	391.137	42.667	22.9557	36.7751	50.73	51.9932
486	ENSG00000204219	TCEA3	protein_coding	1397.36	-3.02087	0.483208	-6.25169	4.06039e-10	5.82074e-08	429.438	1110	3217.2	3158.3	3780.13	166.99	45.9114	528.936	266.007	601.635
9477	ENSG00000211445	GPX3	protein_coding	385.251	-2.36472	0.378385	-6.24951	4.11741e-10	5.84284e-08	559.947	426.166	800.511	1208.73	1368.98	188.323	109.195	121.28	234.138	138.648
31176	ENSG00000095752	IL11	protein_coding	61.6634	5.92451	0.948082	6.24894	4.13242e-10	5.84284e-08	0.729097	2.26684	5.51126	0	0	5.8851	429.333	81.3748	369.418	14.8552
32308	ENSG00000154646	TMPRSS15	protein_coding	17.4497	-23.353	3.73836	-6.24684	4.18829e-10	5.88155e-08	261.746	0	0	0	0	0	0	0	0	0
7160	ENSG00000068078	FGFR3	protein_coding	425.63	-3.09785	0.496191	-6.24327	4.2852e-10	5.93687e-08	160.401	434.477	713.708	731.088	1386.99	34.575	16.131	133.016	45.5269	299.58
10562	ENSG00000112655	PTK7	protein_coding	334.556	2.4009	0.384493	6.24432	4.25654e-10	5.93687e-08	148.007	159.434	63.3795	90.9799	41.1723	574.533	631.591	680.731	583.395	212.924
3430	ENSG00000162949	CAPN13	protein_coding	163.824	-3.85009	0.616918	-6.24085	4.3521e-10	5.98936e-08	253.726	351.36	300.364	352.547	249.607	0.735638	16.131	64.9433	27.9665	49.5173
15495	ENSG00000196196	HRCT1	protein_coding	641.286	-4.17144	0.668837	-6.23686	4.46452e-10	6.10338e-08	15.311	367.983	1315.81	789.575	5957.12	20.5979	31.0212	74.3327	11.0565	230.255
17597	ENSG00000149257	SERPINH1	protein_coding	1079.29	2.16815	0.347739	6.23501	4.51761e-10	6.13533e-08	406.836	507.016	516.681	407.785	293.353	1818.5	2508.99	1499.17	3138.1	916.07
25233	ENSG00000125148	MT2A	protein_coding	3219.42	-2.91746	0.468012	-6.23374	4.55443e-10	6.14491e-08	1413.72	2610.64	13267	12716.1	9528.82	484.785	598.709	744.892	1231.83	1059.67
9854	ENSG00000198721	ECI2	protein_coding	399.852	-1.544	0.248368	-6.21658	5.08092e-10	6.7668e-08	395.9	465.458	777.088	573.498	442.602	155.22	119.121	259.773	203.57	180.738
28537	ENSG00000101311	FERMT1	protein_coding	854.139	2.5198	0.405333	6.21662	5.07993e-10	6.7668e-08	179.358	400.475	161.204	108.851	74.6248	564.234	2196.92	618.918	677.05	1138.9
15450	ENSG00000172724	CCL19	protein_coding	105.114	-3.308	0.532814	-6.20856	5.3473e-10	7.07592e-08	195.398	112.586	161.204	477.644	334.525	16.184	2.48169	51.6417	66.9896	29.7104
28943	ENSG00000101104	PABPC1L	protein_coding	289.13	2.20266	0.355843	6.18999	6.01666e-10	7.91095e-08	109.365	151.123	114.359	113.725	38.599	626.763	642.759	305.155	312.835	420.897
25753	ENSG00000103257	SLC7A5	protein_coding	316.504	3.42239	0.554406	6.17307	6.69749e-10	8.7504e-08	186.649	70.272	22.045	64.9856	30.8792	381.06	1011.91	754.282	303.079	663.532
17809	ENSG00000166670	MMP10	protein_coding	30.2127	6.72521	1.08976	6.17128	6.77387e-10	8.79453e-08	2.18729	0	0	0	0	12.5058	94.3044	74.3327	141.133	27.2345
19658	ENSG00000173391	OLR1	protein_coding	22.3038	5.53999	0.898557	6.16544	7.02891e-10	9.06861e-08	1.45819	0	1.37782	1.62464	0	51.4946	147.04	15.649	107.313	2.47586
11252	ENSG00000120254	MTHFD1L	protein_coding	178.739	2.35841	0.382877	6.15972	7.28749e-10	9.34384e-08	55.4114	60.449	52.357	63.361	66.905	245.703	298.424	315.327	216.578	529.835
11965	ENSG00000146733	PSPH	protein_coding	93.0025	2.13153	0.347573	6.13263	8.64384e-10	1.10145e-07	40.1004	40.8031	38.5788	30.8682	18.0129	99.3111	212.805	126.757	148.938	151.028
10749	ENSG00000111799	COL12A1	protein_coding	1126.1	3.81772	0.62569	6.10161	1.05007e-09	1.32985e-07	528.596	134.499	82.6689	108.851	41.1723	2540.89	6663.97	850.523	3759.22	465.463
10416	ENSG00000124664	SPDEF	protein_coding	331.96	-3.45396	0.567121	-6.09033	1.12677e-09	1.41829e-07	261.017	300.734	527.703	638.484	710.222	8.82765	9.30636	143.971	78.0461	56.9449
2583	ENSG00000081277	PKP1	protein_coding	49.1063	4.72067	0.77589	6.0842	1.17074e-09	1.4647e-07	4.37458	0.755613	1.37782	6.49856	0	18.3909	88.1002	24.2559	88.4522	158.455
12549	ENSG00000105976	MET	protein_coding	556.689	2.57855	0.424143	6.07943	1.20611e-09	1.49088e-07	344.863	176.813	99.2027	77.9827	28.306	770.213	1093.81	477.294	468.927	735.332
18865	ENSG00000189129	PLAC9	protein_coding	374.077	-4.16186	0.684543	-6.07977	1.20357e-09	1.49088e-07	25.5184	86.8955	717.842	1519.04	2884.63	17.6553	13.6493	34.4278	48.1284	59.4207
10715	ENSG00000112280	COL9A1	protein_coding	65.3918	3.71558	0.612051	6.07071	1.27345e-09	1.55549e-07	8.02007	18.8903	9.64471	16.2464	2.57327	371.497	89.341	74.3327	271.21	32.1862
16418	ENSG00000176884	GRIN1	protein_coding	51.9499	-3.3383	0.549886	-6.0709	1.27199e-09	1.55549e-07	25.5184	37.7806	46.8457	47.1146	187.849	3.67819	1.86127	13.3016	4.55269	4.95173
4563	ENSG00000236841	AC007750.1	antisense	36.7071	4.16285	0.68598	6.06846	1.2914e-09	1.55897e-07	9.47827	3.02245	1.37782	12.9971	0	134.622	107.954	20.3437	251.699	0
22075	ENSG00000139910	NOVA1	protein_coding	70.0075	-5.01225	0.82591	-6.06876	1.28899e-09	1.55897e-07	19.6856	29.4689	194.272	493.891	236.741	2.20691	2.48169	3.91225	10.4061	7.42759
3278	ENSG00000143867	OSR1	protein_coding	24.9715	-4.55812	0.751359	-6.0665	1.30728e-09	1.562e-07	18.9565	41.5587	45.4679	79.6074	131.237	5.8851	1.24085	3.91225	1.30077	2.47586
11811	ENSG00000106483	SFRP4	protein_coding	189.061	5.77384	0.951791	6.06628	1.30905e-09	1.562e-07	8.02007	6.0449	1.37782	32.4928	0	818.765	590.643	37.5576	1324.83	7.42759
24045	ENSG00000157766	ACAN	protein_coding	24.1249	5.15272	0.850197	6.06062	1.35597e-09	1.60869e-07	0	1.51123	1.37782	1.62464	7.71981	44.1383	139.595	16.4314	98.8584	32.1862
9999	ENSG00000111802	TDP2	protein_coding	1645.82	-1.98619	0.327844	-6.05833	1.37539e-09	1.62242e-07	2468.72	2746.65	3695.3	2576.68	2562.98	776.098	272.366	1089.95	626.32	1074.53
25202	ENSG00000103494	RPGRIP1L	protein_coding	50.9626	3.48647	0.5767	6.04555	1.48902e-09	1.74647e-07	22.602	14.3566	5.51126	8.1232	0	215.542	98.0269	73.5503	53.3315	71.8001
7834	ENSG00000138795	LEF1	protein_coding	77.3833	2.87436	0.475612	6.04349	1.50817e-09	1.75893e-07	50.3077	26.4465	8.26689	25.9942	2.57327	200.829	114.778	215.956	197.717	29.7104
1244	ENSG00000172260	NEGR1	protein_coding	237.83	-3.14108	0.520559	-6.03406	1.59894e-09	1.85432e-07	62.7024	106.541	369.254	955.289	1487.35	16.9197	29.1599	52.4241	56.5834	71.8001
12671	ENSG00000106484	MEST	protein_coding	340.594	1.7752	0.294412	6.02963	1.64334e-09	1.89516e-07	174.983	191.926	216.317	82.8567	79.7713	589.246	387.144	570.406	451.367	462.987
20395	ENSG00000111110	PPM1H	protein_coding	111.674	2.81025	0.466344	6.02614	1.6792e-09	1.91513e-07	38.6422	34.7582	24.8007	11.3725	15.4396	258.209	304.628	162.75	98.208	76.7518
26843	ENSG00000128422	KRT17	protein_coding	108.46	6.71024	1.11339	6.02686	1.67171e-09	1.91513e-07	0.729097	0.755613	1.37782	3.24928	15.4396	32.3681	212.185	211.261	169.1	51.9932
24493	ENSG00000228146	CASP16P	transcribed_unitary_pseudogene	28.3779	-5.19842	0.862946	-6.02404	1.70121e-09	1.92957e-07	159.672	14.3566	33.0676	38.9914	159.543	0	0.620424	1.5649	3.25192	4.95173
2181	ENSG00000162734	PEA15	protein_coding	539.405	1.53837	0.255619	6.01823	1.76332e-09	1.98909e-07	397.358	355.138	297.608	276.189	211.008	1164.51	925.672	721.419	1211.02	514.98
2476	ENSG00000143333	RGS16	protein_coding	104.302	3.24504	0.539671	6.01299	1.82131e-09	2.04333e-07	16.0401	14.3566	20.6672	25.9942	59.1852	159.633	393.969	143.188	604.207	94.0829
24020	ENSG00000136383	ALPK3	protein_coding	42.5158	3.31175	0.552378	5.99545	2.0292e-09	2.26426e-07	13.1238	18.8903	2.75563	1.62464	15.4396	86.8052	55.8381	94.6764	91.7042	128.745
16473	ENSG00000185885	IFITM1	protein_coding	802.035	3.28853	0.548662	5.99372	2.0509e-09	2.27617e-07	652.542	324.914	201.161	37.3667	23.1594	1997.99	2571.66	1235.49	1287.11	965.587
26199	ENSG00000264016	AC015908.3	lincRNA	19.8855	-4.02702	0.672136	-5.99137	2.08077e-09	2.29697e-07	27.7057	12.0898	19.2894	42.2407	87.4911	2.94255	0.620424	0.78245	4.55269	0
1385	ENSG00000172031	EPHX4	protein_coding	20.3174	5.10351	0.852044	5.98973	2.10189e-09	2.30794e-07	3.64549	0	2.75563	0	0	60.3223	61.4219	46.1645	20.1619	27.2345
3500	ENSG00000143891	GALM	protein_coding	650.918	-1.83041	0.305641	-5.98876	2.11447e-09	2.30947e-07	589.84	499.46	1346.13	1298.09	1654.61	278.807	111.676	298.113	344.704	490.221
20988	ENSG00000135124	P2RX4	protein_coding	712.775	-2.2176	0.371569	-5.96821	2.39872e-09	2.60614e-07	399.545	831.93	1635.47	1327.33	2164.12	219.956	136.493	314.545	245.195	408.518
24066	ENSG00000166825	ANPEP	protein_coding	3264.09	-4.49067	0.754203	-5.95419	2.61356e-09	2.8247e-07	39248	715.565	2387.75	1293.21	3944.82	86.8052	230.798	123.627	182.108	146.076
4800	ENSG00000187699	C2orf88	protein_coding	245.82	-3.03448	0.510654	-5.94234	2.8099e-09	3.02108e-07	521.305	850.064	739.887	310.306	326.805	25.7473	24.1965	165.879	53.9819	96.5587
30266	ENSG00000089351	GRAMD1A	protein_coding	466.378	1.23212	0.207609	5.93483	2.94149e-09	3.14617e-07	265.391	255.397	186.005	298.934	229.021	612.051	688.67	470.252	693.309	438.228
22628	ENSG00000211448	DIO2	protein_coding	91.0931	3.77697	0.637028	5.92904	3.04711e-09	3.24234e-07	10.9365	34.7582	27.5563	8.1232	2.57327	288.37	240.724	104.848	400.637	101.51
21955	ENSG00000211829	TRDC	TR_C_gene	41.0605	-4.30843	0.727172	-5.92492	3.12457e-09	3.29084e-07	25.5184	42.3143	179.116	216.077	87.4911	2.94255	1.86127	14.0841	5.85346	2.47586
26664	ENSG00000271503	CCL5	protein_coding	554.476	-2.99781	0.505964	-5.92494	3.12409e-09	3.29084e-07	272.682	507.016	1696.09	3190.79	1121.95	196.415	63.2832	202.655	121.622	153.504
3815	ENSG00000163013	FBXO41	protein_coding	80.7131	2.04159	0.345364	5.91141	3.39182e-09	3.54418e-07	51.0368	42.3143	23.4229	38.9914	20.5862	189.059	156.347	115.803	138.532	116.366
15191	ENSG00000167701	GPT	protein_coding	1048.69	-4.2316	0.71595	-5.91047	3.41136e-09	3.54418e-07	372.569	683.074	1915.16	2415.84	5542.82	19.1266	14.8902	278.552	67.6399	311.959
23888	ENSG00000136425	CIB2	protein_coding	141.843	-2.35992	0.399295	-5.91022	3.41661e-09	3.54418e-07	100.615	98.2297	238.362	557.252	514.654	33.8393	20.474	78.245	55.933	64.3725
17936	ENSG00000235910	APOA1-AS	antisense	85.3905	-6.54361	1.10856	-5.90278	3.57436e-09	3.68927e-07	1165.83	3.77806	26.1785	4.87392	69.4783	0.735638	0.620424	0.78245	0	0
25722	ENSG00000269186	LINC01082	lincRNA	99.5109	-3.78524	0.642353	-5.89278	3.79751e-09	3.9001e-07	24.0602	87.6511	367.877	383.415	422.016	5.8851	2.48169	45.3821	35.7711	4.95173
5231	ENSG00000251791	SCARNA6	scaRNA	8.12075	21.7781	3.70019	5.88569	3.964e-09	4.05093e-07	0	0	0	0	0	0	0	0	1.30077	118.841
1572	ENSG00000116455	WDR77	protein_coding	193.986	1.32219	0.224709	5.88402	4.00429e-09	4.06589e-07	96.97	95.9628	86.8023	82.8567	95.211	263.358	176.2	268.38	187.961	272.345
4680	ENSG00000128656	CHN1	protein_coding	49.3282	3.2051	0.544915	5.88184	4.05742e-09	4.06589e-07	26.9766	23.424	8.26689	4.87392	2.57327	110.346	167.514	67.2907	189.262	19.8069
25694	ENSG00000135709	KIAA0513	protein_coding	185.085	-1.55047	0.263585	-5.88223	4.04774e-09	4.06589e-07	184.462	256.908	274.185	248.57	375.697	92.6903	89.341	75.1152	89.1026	101.51
27405	ENSG00000168646	AXIN2	protein_coding	593.924	3.20594	0.545049	5.88193	4.05507e-09	4.06589e-07	90.4081	278.066	52.357	21.1203	15.4396	970.306	666.335	611.093	236.089	396.138
18721	ENSG00000107719	PALD1	protein_coding	100.839	3.32852	0.566347	5.87718	4.17316e-09	4.16167e-07	36.4549	73.2944	37.201	16.2464	0	274.393	295.322	207.349	247.796	143.6
9552	ENSG00000135083	CCNJL	protein_coding	110.739	-2.35374	0.400722	-5.87373	4.26085e-09	4.22869e-07	102.074	112.586	235.606	159.215	126.09	23.5404	26.6782	21.1261	38.3727	34.6621
10617	ENSG00000172348	RCAN2	protein_coding	114.192	-1.84248	0.313819	-5.87115	4.32774e-09	4.25417e-07	169.151	247.085	201.161	230.699	198.142	59.5867	69.4875	52.4241	81.9484	27.2345
19218	ENSG00000197893	NRAP	protein_coding	44.0901	-4.75527	0.809856	-5.87174	4.31242e-09	4.25417e-07	2.91639	38.5363	60.6239	159.215	234.167	2.20691	0	7.8245	1.95115	4.95173
7769	ENSG00000172955	ADH6	protein_coding	142.677	-3.8162	0.650816	-5.86371	4.52637e-09	4.42834e-07	289.452	160.946	181.872	121.848	226.448	1.47128	2.48169	53.2066	18.2108	17.3311
1780	ENSG00000131781	FMO5	protein_coding	254.834	-2.45704	0.419253	-5.8605	4.61462e-09	4.49338e-07	483.392	351.36	351.343	295.685	633.024	55.1728	128.428	107.978	55.933	61.8966
16419	ENSG00000184709	LRRC26	protein_coding	226.165	-3.69245	0.630615	-5.85533	4.76074e-09	4.6139e-07	82.388	142.055	392.677	401.286	213.581	1.47128	6.82466	71.2029	14.3085	37.138
4562	ENSG00000115263	GCG	protein_coding	269.62	-5.52662	0.944668	-5.85033	4.90612e-09	4.73257e-07	1123.54	991.364	436.767	1057.64	229.021	0.735638	0	82.9397	24.7146	24.7586
28944	ENSG00000025772	TOMM34	protein_coding	302.16	2.2429	0.383633	5.84645	5.02163e-09	4.82147e-07	127.592	187.392	97.8249	84.4813	72.0515	361.934	668.196	321.587	442.912	930.925
10591	ENSG00000237686	AL109615.3	antisense	22.4577	4.55779	0.780591	5.8389	5.2548e-09	5.02198e-07	5.83278	0	0	1.62464	5.14654	44.8739	68.867	14.8665	31.8688	91.607
32165	ENSG00000075275	CELSR1	protein_coding	106.095	2.84623	0.487587	5.83738	5.30284e-09	5.04454e-07	22.602	71.7832	34.4454	24.3696	0	339.129	322	187.788	151.539	29.7104
13089	ENSG00000011201	ANOS1	protein_coding	37.5471	4.42887	0.758875	5.8361	5.34367e-09	5.06006e-07	8.02007	6.80052	2.75563	1.62464	0	104.461	219.63	32.0804	157.393	2.47586
25351	ENSG00000172828	CES3	protein_coding	947.023	-2.38199	0.408281	-5.8342	5.40493e-09	5.0947e-07	658.375	1516.52	1121.54	1694.5	2617.01	116.966	176.2	400.614	373.32	354.049
32645	ENSG00000210140	MT-TC	Mt_tRNA	481.065	-4.59763	0.78826	-5.83263	5.45608e-09	5.11954e-07	26.9766	36.2694	675.129	1447.55	3638.6	36.7819	9.30636	13.3016	10.4061	138.648
9123	ENSG00000233006	MIR3936HG	processed_transcript	43.7497	-2.34041	0.401412	-5.83044	5.52813e-09	5.12625e-07	81.6589	74.0501	48.2235	74.7335	108.077	14.7128	19.2331	14.8665	8.45499	19.8069
19537	ENSG00000089692	LAG3	protein_coding	111.599	-3.10637	0.532697	-5.8314	5.49658e-09	5.12625e-07	56.1405	52.8929	121.248	516.636	571.266	19.8622	3.10212	26.6033	24.7146	71.8001
28912	ENSG00000101049	SGK2	protein_coding	290.17	-2.07491	0.355894	-5.83015	5.53773e-09	5.12625e-07	258.1	572.755	450.546	435.404	643.317	172.139	90.5819	101.718	68.9407	160.931
23260	ENSG00000233041	PHGR1	protein_coding	12870.5	-3.37076	0.579484	-5.81683	5.99726e-09	5.52685e-07	5548.43	11270.7	52450.7	30670	28043.5	1123.32	1042.93	4405.19	1625.31	6135.19
12478	ENSG00000091127	PUS7	protein_coding	86.41	3.02918	0.520865	5.81567	6.039e-09	5.54058e-07	32.0803	43.0699	16.5338	9.74784	2.57327	123.587	231.418	170.574	138.532	94.0829
16399	ENSG00000176919	C8G	protein_coding	50.5318	-3.19687	0.550137	-5.81105	6.20821e-09	5.67062e-07	110.094	35.5138	119.87	89.3552	226.448	8.82765	4.96339	7.8245	14.9588	24.7586
17965	ENSG00000160593	JAML	protein_coding	523.42	-2.50629	0.431522	-5.80803	6.32117e-09	5.74837e-07	584.736	405.764	1029.23	1943.07	1636.6	205.243	78.1734	255.079	143.735	212.924
10511	ENSG00000124731	TREM1	protein_coding	16.804	5.63661	0.971614	5.80128	6.58099e-09	5.95839e-07	3.64549	1.51123	0	0	0	35.3106	75.6917	33.6453	63.0873	24.7586
14274	ENSG00000134013	LOXL2	protein_coding	253.479	3.08336	0.531679	5.79928	6.66018e-09	6.00376e-07	142.174	60.449	33.0676	38.9914	43.7456	454.624	845.017	446.779	962.568	108.938
1146	ENSG00000184292	TACSTD2	protein_coding	100.767	4.59209	0.792008	5.79803	6.7098e-09	6.02219e-07	6.56188	4.53368	15.156	6.49856	0	627.499	12.4085	525.024	48.7788	22.2828
15241	ENSG00000080608	PUM3	protein_coding	273.445	1.61083	0.277933	5.79576	6.80137e-09	6.07795e-07	137.07	168.502	169.471	112.1	97.7842	441.383	372.875	367.751	373.971	544.69
8049	ENSG00000151617	EDNRA	protein_coding	90.2803	3.04516	0.525646	5.79318	6.90664e-09	6.14542e-07	41.5586	37.025	20.6672	4.87392	12.8663	114.759	545.973	97.8062	224.383	131.221
21985	ENSG00000129474	AJUBA	protein_coding	78.4365	3.42768	0.59188	5.79118	6.9895e-09	6.19246e-07	10.9365	21.1572	12.4003	1.62464	30.8792	51.4946	312.073	161.185	204.221	64.3725
15008	ENSG00000104549	SQLE	protein_coding	284.592	2.98984	0.516665	5.78681	7.17362e-09	6.32842e-07	209.251	120.142	38.5788	47.1146	10.2931	735.638	383.422	545.368	425.351	497.649
4564	ENSG00000078098	FAP	protein_coding	95.5295	4.28982	0.743042	5.77332	7.77255e-09	6.8276e-07	13.8529	9.06735	1.37782	21.1203	5.14654	270.715	478.347	43.8172	554.778	2.47586
8767	ENSG00000171617	ENC1	protein_coding	761.98	2.0896	0.362201	5.76917	7.96637e-09	6.93881e-07	444.02	469.991	147.426	103.977	56.6119	1092.42	1386.65	894.34	753.145	346.621
19783	ENSG00000111700	SLCO1B3	protein_coding	26.5258	6.78287	1.17568	5.7693	7.96029e-09	6.93881e-07	1.45819	0	0	0	0	33.1037	130.909	89.1993	11.0565	4.95173
15405	ENSG00000165269	AQP7	protein_coding	110.473	-2.84148	0.492593	-5.76842	8.00205e-09	6.94061e-07	245.706	185.881	330.676	141.344	208.435	10.2989	57.6994	32.0804	31.2184	19.8069
11337	ENSG00000146477	SLC22A3	protein_coding	96.1441	4.43448	0.769161	5.76535	8.14908e-09	7.03856e-07	96.97	1.51123	2.75563	4.87392	0	270.715	198.536	71.2029	116.419	207.973
13763	ENSG00000102024	PLS3	protein_coding	443.039	2.44863	0.425055	5.76073	8.37485e-09	7.20342e-07	335.385	292.422	125.381	81.232	36.0258	930.582	1215.41	732.373	976.227	341.669
8318	ENSG00000145506	NKD2	protein_coding	85.9673	3.35856	0.583092	5.75991	8.41571e-09	7.20853e-07	22.602	9.06735	30.3119	11.3725	25.7327	175.082	165.033	117.367	180.156	282.249
14613	ENSG00000137573	SULF1	protein_coding	944.697	4.03533	0.701114	5.7556	8.63325e-09	7.34432e-07	211.438	112.586	63.3795	69.8595	61.7585	3127.93	5162.55	823.92	3627.19	141.124
31435	ENSG00000215193	PEX26	protein_coding	662.18	-1.61921	0.281339	-5.75537	8.64539e-09	7.34432e-07	910.643	1318.54	1197.32	672.601	1641.75	281.014	421.268	577.448	266.007	321.862
5647	ENSG00000187091	PLCD1	protein_coding	305.711	-2.2981	0.399512	-5.75227	8.80524e-09	7.44945e-07	140.716	681.563	686.152	583.246	769.407	89.7478	67.0058	169.009	137.231	101.51
28487	ENSG00000088827	SIGLEC1	protein_coding	183.951	-2.74673	0.477896	-5.74756	9.05419e-09	7.6288e-07	282.161	256.153	228.717	610.865	851.752	36.7819	76.3121	81.3748	89.1026	24.7586
21890	ENSG00000232070	TMEM253	protein_coding	119.601	-3.82438	0.665929	-5.74292	9.30593e-09	7.77742e-07	333.927	279.577	326.542	144.593	329.378	11.7702	6.82466	53.2066	45.5269	0
23302	ENSG00000137825	ITPKA	protein_coding	220.637	-2.80271	0.487994	-5.74332	9.28392e-09	7.77742e-07	180.816	319.624	701.308	589.744	730.808	18.3909	73.21	100.154	79.9972	76.7518
26196	ENSG00000187824	TMEM220	protein_coding	91.0607	-2.96538	0.516458	-5.74177	9.36925e-09	7.79877e-07	183.733	130.721	253.518	131.596	236.741	6.62074	13.6493	68.0731	29.9177	24.7586
7611	ENSG00000163734	CXCL3	protein_coding	342.583	3.59097	0.626597	5.73091	9.98961e-09	8.28175e-07	150.194	306.779	13.7782	8.1232	38.599	726.81	775.53	675.254	771.356	774.946
1031	ENSG00000142700	DMRTA2	protein_coding	13.168	17.9097	3.12631	5.72871	1.01196e-08	8.35599e-07	0	0	0	0	0	2.20691	7.44508	0	5.85346	0
27106	ENSG00000120068	HOXB8	protein_coding	233.303	3.22601	0.564084	5.71902	1.0714e-08	8.8092e-07	35.7258	34.7582	27.5563	22.745	12.8663	1517.62	87.4797	187.006	107.313	267.393
32161	ENSG00000075234	TTC38	protein_coding	754.26	-1.72623	0.301874	-5.71839	1.07539e-08	8.8092e-07	1091.46	855.354	1144.96	1181.11	1070.48	276.6	307.73	465.558	230.236	363.952
15019	ENSG00000254166	CASC19	processed_transcript	185.967	3.74288	0.655327	5.71147	1.12001e-08	9.13852e-07	7.29097	6.0449	15.156	55.2378	66.905	157.426	554.659	246.472	161.946	472.89
19445	ENSG00000151067	CACNA1C	protein_coding	96.9854	2.7004	0.473639	5.70137	1.18846e-08	9.65879e-07	22.602	28.7133	13.7782	19.4957	2.57327	232.462	98.6474	37.5576	207.473	59.4207
18018	ENSG00000248712	CCDC153	protein_coding	178.877	-3.27448	0.574456	-5.70014	1.19706e-08	9.69056e-07	68.5352	151.878	569.038	476.02	578.986	10.2989	16.131	76.6801	39.023	42.0897
14503	ENSG00000196711	ALKAL1	protein_coding	15.916	5.35996	0.941441	5.69335	1.2457e-08	1.00449e-06	2.18729	1.51123	0	0	0	105.932	39.7071	31.298	43.5757	2.47586
11152	ENSG00000112378	PERP	protein_coding	1708.48	2.15305	0.37859	5.68703	1.29264e-08	1.03829e-06	1134.48	1260.36	770.199	308.682	133.81	4331.43	3941.55	2806.65	1787.91	1329.54
20533	ENSG00000139289	PHLDA1	protein_coding	524.434	3.35185	0.589622	5.68475	1.31003e-08	1.04818e-06	363.82	173.791	75.7798	56.8624	5.14654	763.592	1611.24	1265.22	1311.82	222.828
22796	ENSG00000168350	DEGS2	protein_coding	545.899	-2.79473	0.492158	-5.67852	1.35867e-08	1.08289e-06	431.626	200.993	812.911	1486.55	1695.78	95.6329	35.3641	244.907	118.37	99.0346
899	ENSG00000117394	SLC2A1	protein_coding	395.386	2.56592	0.452092	5.67566	1.38157e-08	1.09691e-06	241.331	304.512	95.0692	73.1088	30.8792	1432.29	914.504	622.048	362.914	745.235
18734	ENSG00000107738	VSIR	protein_coding	593.154	-2.02166	0.357933	-5.64815	1.62186e-08	1.28276e-06	655.459	586.356	1065.05	1421.56	1927.38	262.623	143.938	346.625	280.316	259.966
27266	ENSG00000108375	RNF43	protein_coding	1254.33	1.97035	0.348891	5.64745	1.62842e-08	1.28303e-06	511.097	389.896	347.209	294.06	349.965	1477.16	2325.97	1255.05	666.644	1849.47
5994	ENSG00000114251	WNT5A	protein_coding	193.972	2.96581	0.525364	5.64524	1.64951e-08	1.29471e-06	165.505	65.7383	37.201	34.1175	10.2931	242.025	776.15	414.698	537.868	143.6
[truncated: 32,419 more rows]

## Sheet: AN
	ENSEMBL	gene_name	gene_biotype	baseMean	log2FoldChange	lfcSE	stat	pvalue	padj	PN1	PN2	PN3	PN4	PN5	PA1	PA2	PA3	PA4	PA5
[truncated: 32,682 more rows]
